# Supplementary material for: Gut microbiota contributes to lignocellulose deconstruction and nitrogen fixation of the larva of Apriona swainsoni
Source: Front Physiol. 2022 Dec 23;13:1072893. doi: 10.3389/fphys.2022.1072893 (PMC9816477; doi:10.3389/fphys.2022.1072893)
Supplement: Supplementary file 1 [file Table2.XLSX]

## Sheet: Lignocellulose Deconstruction
Lignin degrading enzyme
Peroxidase		Peroxidase
PHG bin.3
Gene_id	Database_NR	NR_anno	Database_swissport	swissport_anno	GO_Anno	Database_KEGG	KO	gene_name	KEGG_anno	Pathway	Pathway_definition	Portein name in COG	COG id	COG defination	Function code
gene3072 3240781 3241878 k141_364759_length_6669_cov_13.0000 12 1109	WP_115168044.1	c-type cytochrome [Providencia rettgeri]	P37197.1	RecName: Full=Probable cytochrome c peroxidase	Molecular Function: cytochrome-c peroxidase activity (GO:0004130);|Molecular Function: electron transfer activity (GO:0009055);|Molecular Function: heme binding (GO:0020037);|Biological Process: response to hydrogen peroxide (GO:0042542);|Molecular Function: metal ion binding (GO:0046872);	ses:SARI_03824	K00428	E1.11.1.5	cytochrome c peroxidase [EC:1.11.1.5]			STM3820	COG1858	Cytochrome c peroxidase
gene3073 3241939 3242187 k141_364759_length_6669_cov_13.0000_2 1170 1418	WP_109912769.1	MULTISPECIES: c-type cytochrome [Providencia]	P37197.1	RecName: Full=Probable cytochrome c peroxidase	Molecular Function: cytochrome-c peroxidase activity (GO:0004130);|Molecular Function: electron transfer activity (GO:0009055);|Molecular Function: heme binding (GO:0020037);|Biological Process: response to hydrogen peroxide (GO:0042542);|Molecular Function: metal ion binding (GO:0046872);	slq:M495_09560	K00428	E1.11.1.5	cytochrome c peroxidase [EC:1.11.1.5]			yhjA	COG1858	Cytochrome c peroxidase	[P]
Catalase-peroxidase
AHG_bin.1
gene0399 418670 417615 k141_27246_length_78455_cov_40.0548_16 13928 12873	WP_095098041.1	MULTISPECIES: catalase family peroxidase [Enterobacteriaceae]	Q55025.2	RecName: Full=Catalase-related peroxidase; AltName: Full=Protein SrpA; AltName: Full=Sulfur-regulated plasmid-encoded protein A; Flags: Precursor	Molecular Function: catalase activity (GO:0004096);|Molecular Function: peroxidase activity (GO:0004601);|Molecular Function: iron ion binding (GO:0005506);|Biological Process: response to oxidative stress (GO:0006979);|Molecular Function: heme binding (GO:0020037);|Cellular Component: periplasmic space (GO:0042597);|Biological Process: hydrogen peroxide metabolic process (GO:0042743);|Biological…	ron:TE10_10760	K03781	katE, CAT, catB, srpA	catalase [EC:1.11.1.6]	ko00380,ko00630,ko04011,ko04016,ko04068,ko04146,ko04211,ko04212,ko04213,ko05014	Tryptophan metabolism|Glyoxylate and dicarboxylate metabolism|MAPK signaling pathway - yeast|MAPK signaling pathway - plant|FoxO signaling pathway|Peroxisome|Longevity regulating pathway|Longevity regulating pathway - worm|Longevity regulating pathway - multiple species|Amyotrophic lateral sclerosis (ALS)	HP0485	COG0753	Catalase	[P]
AHG bin.4
gene1982 2141330 2139894 k141_223399_length_8599_cov_30.0000_7 7500 6064	WP_121553168.1	catalase [Gibbsiella quercinecans]	P42321.1	RecName: Full=Catalase	Molecular Function: catalase activity (GO:0004096);|Cellular Component: cytoplasm (GO:0005737);|Biological Process: response to oxidative stress (GO:0006979);|Molecular Function: heme binding (GO:0020037);|Biological Process: hydrogen peroxide catabolic process (GO:0042744);|Molecular Function: metal ion binding (GO:0046872);	sfw:WN53_25515	K03781	katE, CAT, catB, srpA	catalase [EC:1.11.1.6]	ko00380,ko00630,ko04011,ko04016,ko04068,ko04146,ko04211,ko04212,ko04213,ko05014	Tryptophan metabolism|Glyoxylate and dicarboxylate metabolism|MAPK signaling pathway - yeast|MAPK signaling pathway - plant|FoxO signaling pathway|Peroxisome|Longevity regulating pathway|Longevity regulating pathway - worm|Longevity regulating pathway - multiple species|Amyotrophic lateral sclerosis (ALS)	YPO1207	COG0753	Catalase	[P]
gene2489 2659444 2658176 k141_422007_length_6988_cov_44.2741 1270 2	WP_128822312.1	catalase [Yersinia rohdei]	Q59635.1	RecName: Full=Catalase; AltName: Full=Paraquat-inducible catalase isozyme B; Flags: Precursor	Molecular Function: catalase activity (GO:0004096);|Cellular Component: cytoplasm (GO:0005737);|Molecular Function: heme binding (GO:0020037);|Biological Process: response to hydrogen peroxide (GO:0042542);|Cellular Component: periplasmic space (GO:0042597);|Biological Process: hydrogen peroxide catabolic process (GO:0042744);|Molecular Function: metal ion binding (GO:0046872);	esc:Entcl_3773	K03781	katE, CAT, catB, srpA	catalase [EC:1.11.1.6]	ko00380,ko00630,ko04011,ko04016,ko04068,ko04146,ko04211,ko04212,ko04213,ko05014	Tryptophan metabolism|Glyoxylate and dicarboxylate metabolism|MAPK signaling pathway - yeast|MAPK signaling pathway - plant|FoxO signaling pathway|Peroxisome|Longevity regulating pathway|Longevity regulating pathway - worm|Longevity regulating pathway - multiple species|Amyotrophic lateral sclerosis (ALS)	PA4613	COG0753	Catalase	[P]
gene3791 3900170 3900700 k141_538361_length_2897_cov_35.0000 1 531	WP_050534536.1	catalase [Yersinia rohdei]	Q59635.1	RecName: Full=Catalase; AltName: Full=Paraquat-inducible catalase isozyme B; Flags: Precursor	Molecular Function: catalase activity (GO:0004096);|Cellular Component: cytoplasm (GO:0005737);|Molecular Function: heme binding (GO:0020037);|Biological Process: response to hydrogen peroxide (GO:0042542);|Cellular Component: periplasmic space (GO:0042597);|Biological Process: hydrogen peroxide catabolic process (GO:0042744);|Molecular Function: metal ion binding (GO:0046872);	edl:AAZ33_07050	K03781	katE, CAT, catB, srpA	catalase [EC:1.11.1.6]	ko00380,ko00630,ko04011,ko04016,ko04068,ko04146,ko04211,ko04212,ko04213,ko05014	Tryptophan metabolism|Glyoxylate and dicarboxylate metabolism|MAPK signaling pathway - yeast|MAPK signaling pathway - plant|FoxO signaling pathway|Peroxisome|Longevity regulating pathway|Longevity regulating pathway - worm|Longevity regulating pathway - multiple species|Amyotrophic lateral sclerosis (ALS)	PA4613	COG0753	Catalase	[P]
FG bin.1
gene4561 4736789 4735734 k141_28091_length_4068_cov_66.5635_5 3645 2590	WP_095098041.1	MULTISPECIES: catalase family peroxidase [Enterobacteriaceae]	Q55025.2	RecName: Full=Catalase-related peroxidase; AltName: Full=Protein SrpA; AltName: Full=Sulfur-regulated plasmid-encoded protein A; Flags: Precursor	Molecular Function: catalase activity (GO:0004096);|Molecular Function: peroxidase activity (GO:0004601);|Molecular Function: iron ion binding (GO:0005506);|Biological Process: response to oxidative stress (GO:0006979);|Molecular Function: heme binding (GO:0020037);|Cellular Component: periplasmic space (GO:0042597);|Biological Process: hydrogen peroxide metabolic process (GO:0042743);|Biological…	ron:TE10_10760	K03781	katE, CAT, catB, srpA	catalase [EC:1.11.1.6]	ko00380,ko00630,ko04011,ko04016,ko04068,ko04146,ko04211,ko04212,ko04213,ko05014	Tryptophan metabolism|Glyoxylate and dicarboxylate metabolism|MAPK signaling pathway - yeast|MAPK signaling pathway - plant|FoxO signaling pathway|Peroxisome|Longevity regulating pathway|Longevity regulating pathway - worm|Longevity regulating pathway - multiple species|Amyotrophic lateral sclerosis (ALS)	HP0485	COG0753	Catalase	[P]
MG bin.1
gene0450 473622 472567 k141_425640_length_25770_cov_10.0000_17 14057 13002	WP_095098041.1	MULTISPECIES: catalase family peroxidase [Enterobacteriaceae]	Q55025.2	RecName: Full=Catalase-related peroxidase; AltName: Full=Protein SrpA; AltName: Full=Sulfur-regulated plasmid-encoded protein A; Flags: Precursor	Molecular Function: catalase activity (GO:0004096);|Molecular Function: peroxidase activity (GO:0004601);|Molecular Function: iron ion binding (GO:0005506);|Biological Process: response to oxidative stress (GO:0006979);|Molecular Function: heme binding (GO:0020037);|Cellular Component: periplasmic space (GO:0042597);|Biological Process: hydrogen peroxide metabolic process (GO:0042743);|Biological…	ron:TE10_10760	K03781	katE, CAT, catB, srpA	catalase [EC:1.11.1.6]	ko00380,ko00630,ko04011,ko04016,ko04068,ko04146,ko04211,ko04212,ko04213,ko05014	Tryptophan metabolism|Glyoxylate and dicarboxylate metabolism|MAPK signaling pathway - yeast|MAPK signaling pathway - plant|FoxO signaling pathway|Peroxisome|Longevity regulating pathway|Longevity regulating pathway - worm|Longevity regulating pathway - multiple species|Amyotrophic lateral sclerosis (ALS)	HP0485	COG0753	Catalase	[P]
PHG bin.3
gene4018 4119087 4120526 k141_562568_length_4654_cov_11.0000 328 1767	WP_162598830.1	catalase [Providencia rettgeri]	P42321.1	RecName: Full=Catalase	Molecular Function: catalase activity (GO:0004096);|Cellular Component: cytoplasm (GO:0005737);|Biological Process: response to oxidative stress (GO:0006979);|Molecular Function: heme binding (GO:0020037);|Biological Process: hydrogen peroxide catabolic process (GO:0042744);|Molecular Function: metal ion binding (GO:0046872);	mmk:MU9_2537	K03781	katE, CAT, catB, srpA	catalase [EC:1.11.1.6]	ko00380,ko00630,ko04011,ko04016,ko04068,ko04146,ko04211,ko04212,ko04213,ko05014	Tryptophan metabolism|Glyoxylate and dicarboxylate metabolism|MAPK signaling pathway - yeast|MAPK signaling pathway - plant|FoxO signaling pathway|Peroxisome|Longevity regulating pathway|Longevity regulating pathway - worm|Longevity regulating pathway - multiple species|Amyotrophic lateral sclerosis (ALS)	YPO1207	COG0753	Catalase	[P]
PHG bin.4
gene4026 3983464 3984177 k141_509884_length_3343_cov_67.2252 1 714	WP_095098041.1	MULTISPECIES: catalase family peroxidase [Enterobacteriaceae]	Q55025.2	RecName: Full=Catalase-related peroxidase; AltName: Full=Protein SrpA; AltName: Full=Sulfur-regulated plasmid-encoded protein A; Flags: Precursor	Molecular Function: catalase activity (GO:0004096);|Molecular Function: peroxidase activity (GO:0004601);|Molecular Function: iron ion binding (GO:0005506);|Biological Process: response to oxidative stress (GO:0006979);|Molecular Function: heme binding (GO:0020037);|Cellular Component: periplasmic space (GO:0042597);|Biological Process: hydrogen peroxide metabolic process (GO:0042743);|Biological…	ron:TE10_10760	K03781	katE, CAT, catB, srpA	catalase [EC:1.11.1.6]	ko00380,ko00630,ko04011,ko04016,ko04068,ko04146,ko04211,ko04212,ko04213,ko05014	Tryptophan metabolism|Glyoxylate and dicarboxylate metabolism|MAPK signaling pathway - yeast|MAPK signaling pathway - plant|FoxO signaling pathway|Peroxisome|Longevity regulating pathway|Longevity regulating pathway - worm|Longevity regulating pathway - multiple species|Amyotrophic lateral sclerosis (ALS)	HP0485	COG0753	Catalase	[P]
Fe–Mn superoxide dismutase
AHG_bin.1
gene0287 299622 299002 k141_372894_length_79967_cov_98.2407_62 53566 52946	WP_095105368.1	MULTISPECIES: superoxide dismutase [Mn] [Enterobacteriaceae]	P66829.2	RecName: Full=Superoxide dismutase [Mn]; AltName: Full=MnSOD	Molecular Function: superoxide dismutase activity (GO:0004784);|Molecular Function: metal ion binding (GO:0046872);	ron:TE10_02730	K04564	SOD2	superoxide dismutase, Fe-Mn family [EC:1.15.1.1]	ko04013,ko04068,ko04146,ko04211,ko04212,ko04213,ko05016	MAPK signaling pathway - fly|FoxO signaling pathway|Peroxisome|Longevity regulating pathway|Longevity regulating pathway - worm|Longevity regulating pathway - multiple species|Huntington disease	ECs4834	COG0605	Superoxide dismutase	[P]
gene3903 4192481 4193062 k141_78152_length_18160_cov_43.2288_9 8692 9273	WP_095103048.1	MULTISPECIES: superoxide dismutase [Fe] [Enterobacteriaceae]	P0A2F4.2	RecName: Full=Superoxide dismutase [Fe]	Molecular Function: superoxide dismutase activity (GO:0004784);|Molecular Function: metal ion binding (GO:0046872);	ron:TE10_16615	K04564	SOD2	superoxide dismutase, Fe-Mn family [EC:1.15.1.1]	ko04013,ko04068,ko04146,ko04211,ko04212,ko04213,ko05016	MAPK signaling pathway - fly|FoxO signaling pathway|Peroxisome|Longevity regulating pathway|Longevity regulating pathway - worm|Longevity regulating pathway - multiple species|Huntington disease	STM1431	COG0605	Superoxide dismutase	[P]
AHG bin.4
gene1490 1627064 1626441 k141_54817_length_11245_cov_32.9170_8 7649 7026	WP_121525487.1	superoxide dismutase [Mn] [Gibbsiella quercinecans]	P53655.1	RecName: Full=Superoxide dismutase [Mn]	Molecular Function: superoxide dismutase activity (GO:0004784);|Molecular Function: metal ion binding (GO:0046872);	sers:SERRSCBI_00390	K04564	SOD2	superoxide dismutase, Fe-Mn family [EC:1.15.1.1]	ko04013,ko04068,ko04146,ko04211,ko04212,ko04213,ko05016	MAPK signaling pathway - fly|FoxO signaling pathway|Peroxisome|Longevity regulating pathway|Longevity regulating pathway - worm|Longevity regulating pathway - multiple species|Huntington disease	YPO4061	COG0605	Superoxide dismutase	[P]
gene3656 3783984 3783406 k141_29511_length_3507_cov_64.0000_4 3359 2781	WP_121552696.1	superoxide dismutase [Fe] [Gibbsiella quercinecans]	P0A2F4.2	RecName: Full=Superoxide dismutase [Fe]	Molecular Function: superoxide dismutase activity (GO:0004784);|Molecular Function: metal ion binding (GO:0046872);	smaf:D781_2060	K04564	SOD2	superoxide dismutase, Fe-Mn family [EC:1.15.1.1]	ko04013,ko04068,ko04146,ko04211,ko04212,ko04213,ko05016	MAPK signaling pathway - fly|FoxO signaling pathway|Peroxisome|Longevity regulating pathway|Longevity regulating pathway - worm|Longevity regulating pathway - multiple species|Huntington disease	YPO2386	COG0605	Superoxide dismutase	[P]
AHG bin.5
gene2261 2402144 2402749 k141_347830_length_7397_cov_33.0000_7 5255 5860	WP_010767211.1	superoxide dismutase [Enterococcus phoeniculicola]	Q838I4.1	RecName: Full=Superoxide dismutase [Fe]	Molecular Function: superoxide dismutase activity (GO:0004784);|Molecular Function: metal ion binding (GO:0046872);	ecas:ECBG_01925	K04564	SOD2	superoxide dismutase, Fe-Mn family [EC:1.15.1.1]	ko04013,ko04068,ko04146,ko04211,ko04212,ko04213,ko05016	MAPK signaling pathway - fly|FoxO signaling pathway|Peroxisome|Longevity regulating pathway|Longevity regulating pathway - worm|Longevity regulating pathway - multiple species|Huntington disease	lin1478	COG0605	Superoxide dismutase	[P]
FG bin.1
gene1485 1583791 1584411 k141_224786_length_21865_cov_59.7535_19 20433 21053	WP_095105368.1	MULTISPECIES: superoxide dismutase [Mn] [Enterobacteriaceae]	Q8Z2V9.3	RecName: Full=Superoxide dismutase [Mn]; AltName: Full=MnSOD	Molecular Function: superoxide dismutase activity (GO:0004784);|Molecular Function: metal ion binding (GO:0046872);	ron:TE10_02730	K04564	SOD2	superoxide dismutase, Fe-Mn family [EC:1.15.1.1]	ko04013,ko04068,ko04146,ko04211,ko04212,ko04213,ko05016	MAPK signaling pathway - fly|FoxO signaling pathway|Peroxisome|Longevity regulating pathway|Longevity regulating pathway - worm|Longevity regulating pathway - multiple species|Huntington disease	ECs4834	COG0605	Superoxide dismutase	[P]
gene3348 3556622 3556041 k141_96439_length_9725_cov_58.6354_6 5271 4690	WP_095103048.1	MULTISPECIES: superoxide dismutase [Fe] [Enterobacteriaceae]	P0A2F4.2	RecName: Full=Superoxide dismutase [Fe]	Molecular Function: superoxide dismutase activity (GO:0004784);|Molecular Function: metal ion binding (GO:0046872);	ron:TE10_16615	K04564	SOD2	superoxide dismutase, Fe-Mn family [EC:1.15.1.1]	ko04013,ko04068,ko04146,ko04211,ko04212,ko04213,ko05016	MAPK signaling pathway - fly|FoxO signaling pathway|Peroxisome|Longevity regulating pathway|Longevity regulating pathway - worm|Longevity regulating pathway - multiple species|Huntington disease	STM1431	COG0605	Superoxide dismutase	[P]
FG bin.2
gene1674 1859742 1859062 k141_563040_length_55306_cov_19.5781_23 19948 19268	XP_003073956.1	superoxide dismutase [Encephalitozoon intestinalis ATCC 50506]	P28760.2	RecName: Full=Superoxide dismutase [Mn]	Molecular Function: superoxide dismutase activity (GO:0004784);|Molecular Function: metal ion binding (GO:0046872);	ein:Eint_110960	K04564	SOD2	superoxide dismutase, Fe-Mn family [EC:1.15.1.1]	ko04013,ko04068,ko04146,ko04211,ko04212,ko04213,ko05016	MAPK signaling pathway - fly|FoxO signaling pathway|Peroxisome|Longevity regulating pathway|Longevity regulating pathway - worm|Longevity regulating pathway - multiple species|Huntington disease	ECU11g1080	COG0605	Superoxide dismutase	[P]
MG bin.1
gene1303 1350705 1350085 k141_279877_length_18024_cov_13.0000_12 10660 10040	WP_095105368.1	MULTISPECIES: superoxide dismutase [Mn] [Enterobacteriaceae]	Q8Z2V9.3	RecName: Full=Superoxide dismutase [Mn]; AltName: Full=MnSOD	Molecular Function: superoxide dismutase activity (GO:0004784);|Molecular Function: metal ion binding (GO:0046872);	ron:TE10_02730	K04564	SOD2	superoxide dismutase, Fe-Mn family [EC:1.15.1.1]	ko04013,ko04068,ko04146,ko04211,ko04212,ko04213,ko05016	MAPK signaling pathway - fly|FoxO signaling pathway|Peroxisome|Longevity regulating pathway|Longevity regulating pathway - worm|Longevity regulating pathway - multiple species|Huntington disease	ECs4834	COG0605	Superoxide dismutase	[P]
gene4999 4940034 4940615 k141_521233_length_4746_cov_10.0000_5 2864 3445	WP_095103048.1	MULTISPECIES: superoxide dismutase [Fe] [Enterobacteriaceae]	P0A2F4.2	RecName: Full=Superoxide dismutase [Fe]	Molecular Function: superoxide dismutase activity (GO:0004784);|Molecular Function: metal ion binding (GO:0046872);	ron:TE10_16615	K04564	SOD2	superoxide dismutase, Fe-Mn family [EC:1.15.1.1]	ko04013,ko04068,ko04146,ko04211,ko04212,ko04213,ko05016	MAPK signaling pathway - fly|FoxO signaling pathway|Peroxisome|Longevity regulating pathway|Longevity regulating pathway - worm|Longevity regulating pathway - multiple species|Huntington disease	STM1431	COG0605	Superoxide dismutase	[P]
PHG bin.2
gene2596 3014893 3014213 k141_70694_length_154970_cov_25.0000_52 70972 70292	EGK03883.1	hypothetical protein HMPREF9456_01424 [Dysgonomonas mossii DSM 22836]	P19665.2	RecName: Full=Superoxide dismutase [Mn/Fe]	Molecular Function: superoxide dismutase activity (GO:0004784);|Molecular Function: metal ion binding (GO:0046872);	pbt:ING2E5B_0013	K04564	SOD2	superoxide dismutase, Fe-Mn family [EC:1.15.1.1]	ko04013,ko04068,ko04146,ko04211,ko04212,ko04213,ko05016	MAPK signaling pathway - fly|FoxO signaling pathway|Peroxisome|Longevity regulating pathway|Longevity regulating pathway - worm|Longevity regulating pathway - multiple species|Huntington disease	RSc2526	COG0605	Superoxide dismutase	[P]
PHG bin.3
gene0459 494026 494787 k141_691904_length_22466_cov_12.0000_4 4445 5206	ROR49754.1	UNVERIFIED_ORG: Fe-Mn family superoxide dismutase [Providencia alcalifaciens]	P53655.1	RecName: Full=Superoxide dismutase [Mn]	Molecular Function: superoxide dismutase activity (GO:0004784);|Molecular Function: metal ion binding (GO:0046872);	psx:DR96_1164	K04564	SOD2	superoxide dismutase, Fe-Mn family [EC:1.15.1.1]	ko04013,ko04068,ko04146,ko04211,ko04212,ko04213,ko05016	MAPK signaling pathway - fly|FoxO signaling pathway|Peroxisome|Longevity regulating pathway|Longevity regulating pathway - worm|Longevity regulating pathway - multiple species|Huntington disease	YPO4061	COG0605	Superoxide dismutase	[P]
gene4124 4221178 4221756 k141_643707_length_4458_cov_8.0000_5 2499 3077	WP_102139696.1	MULTISPECIES: superoxide dismutase [Fe] [Providencia]	P0A2F4.2	RecName: Full=Superoxide dismutase [Fe]	Molecular Function: superoxide dismutase activity (GO:0004784);|Molecular Function: metal ion binding (GO:0046872);	psi:S70_19585	K04564	SOD2	superoxide dismutase, Fe-Mn family [EC:1.15.1.1]	ko04013,ko04068,ko04146,ko04211,ko04212,ko04213,ko05016	MAPK signaling pathway - fly|FoxO signaling pathway|Peroxisome|Longevity regulating pathway|Longevity regulating pathway - worm|Longevity regulating pathway - multiple species|Huntington disease	YPO2386	COG0605	Superoxide dismutase	[P]
PHG bin.4
gene1031 1059497 1060078 k141_802829_length_12768_cov_76.2678_2 1206 1787	WP_095103048.1	MULTISPECIES: superoxide dismutase [Fe] [Enterobacteriaceae]	P0A2F4.2	RecName: Full=Superoxide dismutase [Fe]	Molecular Function: superoxide dismutase activity (GO:0004784);|Molecular Function: metal ion binding (GO:0046872);	ron:TE10_16615	K04564	SOD2	superoxide dismutase, Fe-Mn family [EC:1.15.1.1]	ko04013,ko04068,ko04146,ko04211,ko04212,ko04213,ko05016	MAPK signaling pathway - fly|FoxO signaling pathway|Peroxisome|Longevity regulating pathway|Longevity regulating pathway - worm|Longevity regulating pathway - multiple species|Huntington disease	STM1431	COG0605	Superoxide dismutase	[P]
gene3414 3408145 3407525 k141_156781_length_4659_cov_102.5755_3 1707 1087	WP_095105368.1	MULTISPECIES: superoxide dismutase [Mn] [Enterobacteriaceae]	Q8Z2V9.3	RecName: Full=Superoxide dismutase [Mn]; AltName: Full=MnSOD	Molecular Function: superoxide dismutase activity (GO:0004784);|Molecular Function: metal ion binding (GO:0046872);	ron:TE10_02730	K04564	SOD2	superoxide dismutase, Fe-Mn family [EC:1.15.1.1]	ko04013,ko04068,ko04146,ko04211,ko04212,ko04213,ko05016	MAPK signaling pathway - fly|FoxO signaling pathway|Peroxisome|Longevity regulating pathway|Longevity regulating pathway - worm|Longevity regulating pathway - multiple species|Huntington disease	ECs4834	COG0605	Superoxide dismutase	[P]
PHG bin.6
gene3083 2844496 2845116 k141_208436_length_6313_cov_23.2777_2 738 1358	EUB40761.1	superoxide dismutase (Mn) [Klebsiella sp. AS10]	P43019.3	RecName: Full=Superoxide dismutase [Mn]	Molecular Function: superoxide dismutase activity (GO:0004784);|Molecular Function: metal ion binding (GO:0046872);	koy:J415_02515	K04564	SOD2	superoxide dismutase, Fe-Mn family [EC:1.15.1.1]	ko04013,ko04068,ko04146,ko04211,ko04212,ko04213,ko05016	MAPK signaling pathway - fly|FoxO signaling pathway|Peroxisome|Longevity regulating pathway|Longevity regulating pathway - worm|Longevity regulating pathway - multiple species|Huntington disease	STM4055	COG0605	Superoxide dismutase	[P]
PHG bin.9
gene0640 746620 747225 k141_487240_length_49988_cov_36.9890_3 1772 2377	WP_010767211.1	superoxide dismutase [Enterococcus phoeniculicola]	Q838I4.1	RecName: Full=Superoxide dismutase [Fe]	Molecular Function: superoxide dismutase activity (GO:0004784);|Molecular Function: metal ion binding (GO:0046872);	ecas:ECBG_01925	K04564	SOD2	superoxide dismutase, Fe-Mn family [EC:1.15.1.1]	ko04013,ko04068,ko04146,ko04211,ko04212,ko04213,ko05016	MAPK signaling pathway - fly|FoxO signaling pathway|Peroxisome|Longevity regulating pathway|Longevity regulating pathway - worm|Longevity regulating pathway - multiple species|Huntington disease	lin1478	COG0605	Superoxide dismutase	[P]
Protocatechuate dioxygenase		Protocatechuate dioxygenase
AHG_bin.1
gene1225 1334668 1335408 k141_197190_length_50833_cov_38.2174_44 46564 47304	WP_095097410.1	MULTISPECIES: protocatechuate 3,4-dioxygenase subunit beta [Enterobacteriaceae]	P20372.2	RecName: Full=Protocatechuate 3,4-dioxygenase beta chain; AltName: Full=3,4-PCD	Molecular Function: ferric iron binding (GO:0008199);|Molecular Function: protocatechuate 3,4-dioxygenase activity (GO:0018578);|Biological Process: 3,4-dihydroxybenzoate catabolic process (GO:0019619);|Biological Process: beta-ketoadipate pathway (GO:0042952);	ron:TE10_13340	K00449	pcaH	protocatechuate 3,4-dioxygenase, beta subunit [EC:1.13.11.3]	ko00362,ko00624	Benzoate degradation|Polycyclic aromatic hydrocarbon degradation	RSc1441	COG3485	Protocatechuate 3,4-dioxygenase beta subunit	[Q]
FG bin.1
gene3768 3974403 3973663 k141_27596_length_7965_cov_65.1926_6 6832 6092	WP_095097410.1	MULTISPECIES: protocatechuate 3,4-dioxygenase subunit beta [Enterobacteriaceae]	P20372.2	RecName: Full=Protocatechuate 3,4-dioxygenase beta chain; AltName: Full=3,4-PCD	Molecular Function: ferric iron binding (GO:0008199);|Molecular Function: protocatechuate 3,4-dioxygenase activity (GO:0018578);|Biological Process: 3,4-dihydroxybenzoate catabolic process (GO:0019619);|Biological Process: beta-ketoadipate pathway (GO:0042952);	ron:TE10_13340	K00449	pcaH	protocatechuate 3,4-dioxygenase, beta subunit [EC:1.13.11.3]	ko00362,ko00624	Benzoate degradation|Polycyclic aromatic hydrocarbon degradation	RSc1441	COG3485	Protocatechuate 3,4-dioxygenase beta subunit	[Q]
MG bin.1
gene6008 5818014 5818754 k141_169913_length_2129_cov_7.0000_2 1051 1791	WP_095097410.1	MULTISPECIES: protocatechuate 3,4-dioxygenase subunit beta [Enterobacteriaceae]	P20372.2	RecName: Full=Protocatechuate 3,4-dioxygenase beta chain; AltName: Full=3,4-PCD	Molecular Function: ferric iron binding (GO:0008199);|Molecular Function: protocatechuate 3,4-dioxygenase activity (GO:0018578);|Biological Process: 3,4-dihydroxybenzoate catabolic process (GO:0019619);|Biological Process: beta-ketoadipate pathway (GO:0042952);	ron:TE10_13340	K00449	pcaH	protocatechuate 3,4-dioxygenase, beta subunit [EC:1.13.11.3]	ko00362,ko00624	Benzoate degradation|Polycyclic aromatic hydrocarbon degradation	RSc1441	COG3485	Protocatechuate 3,4-dioxygenase beta subunit	[Q]
PHG bin.4
gene1485 1517370 1518110 k141_273678_length_10383_cov_69.0968_4 3616 4356	WP_095097410.1	MULTISPECIES: protocatechuate 3,4-dioxygenase subunit beta [Enterobacteriaceae]	P20372.2	RecName: Full=Protocatechuate 3,4-dioxygenase beta chain; AltName: Full=3,4-PCD	Molecular Function: ferric iron binding (GO:0008199);|Molecular Function: protocatechuate 3,4-dioxygenase activity (GO:0018578);|Biological Process: 3,4-dihydroxybenzoate catabolic process (GO:0019619);|Biological Process: beta-ketoadipate pathway (GO:0042952);	ron:TE10_13340	K00449	pcaH	protocatechuate 3,4-dioxygenase, beta subunit [EC:1.13.11.3]	ko00362,ko00624	Benzoate degradation|Polycyclic aromatic hydrocarbon degradation	RSc1441	COG3485	Protocatechuate 3,4-dioxygenase beta subunit	[Q]
AHG_bin.1
gene1226 1335405 1336025 k141_197190_length_50833_cov_38.2174_45 47301 47921	WP_095097407.1	MULTISPECIES: protocatechuate 3,4-dioxygenase subunit alpha [Enterobacteriaceae]	P20371.3	RecName: Full=Protocatechuate 3,4-dioxygenase alpha chain; AltName: Full=3,4-PCD	Molecular Function: ferric iron binding (GO:0008199);|Molecular Function: protocatechuate 3,4-dioxygenase activity (GO:0018578);|Biological Process: beta-ketoadipate pathway (GO:0042952);	ron:TE10_13335	K00448	pcaG	protocatechuate 3,4-dioxygenase, alpha subunit [EC:1.13.11.3]	ko00362,ko00624	Benzoate degradation|Polycyclic aromatic hydrocarbon degradation	RSc1442	COG3485	Protocatechuate 3,4-dioxygenase beta subunit	[Q]
FG bin.1
gene3767 3973666 3973046 k141_27596_length_7965_cov_65.1926_5 6095 5475	WP_095097407.1	MULTISPECIES: protocatechuate 3,4-dioxygenase subunit alpha [Enterobacteriaceae]	P20371.3	RecName: Full=Protocatechuate 3,4-dioxygenase alpha chain; AltName: Full=3,4-PCD	Molecular Function: ferric iron binding (GO:0008199);|Molecular Function: protocatechuate 3,4-dioxygenase activity (GO:0018578);|Biological Process: beta-ketoadipate pathway (GO:0042952);	ron:TE10_13335	K00448	pcaG	protocatechuate 3,4-dioxygenase, alpha subunit [EC:1.13.11.3]	ko00362,ko00624	Benzoate degradation|Polycyclic aromatic hydrocarbon degradation	RSc1442	COG3485	Protocatechuate 3,4-dioxygenase beta subunit	[Q]
MG bin.1
gene5918 5754617 5754342 k141_358010_length_2365_cov_9.0000_3 2364 2089	WP_095097407.1	MULTISPECIES: protocatechuate 3,4-dioxygenase subunit alpha [Enterobacteriaceae]	P20371.3	RecName: Full=Protocatechuate 3,4-dioxygenase alpha chain; AltName: Full=3,4-PCD	Molecular Function: ferric iron binding (GO:0008199);|Molecular Function: protocatechuate 3,4-dioxygenase activity (GO:0018578);|Biological Process: beta-ketoadipate pathway (GO:0042952);	ron:TE10_13335	K00448	pcaG	protocatechuate 3,4-dioxygenase, alpha subunit [EC:1.13.11.3]	ko00362,ko00624	Benzoate degradation|Polycyclic aromatic hydrocarbon degradation	RSc1442	COG3485	Protocatechuate 3,4-dioxygenase beta subunit	[Q]
gene6009 5818751 5819092 k141_169913_length_2129_cov_7.0000_3 1788 2129	WP_095097407.1	MULTISPECIES: protocatechuate 3,4-dioxygenase subunit alpha [Enterobacteriaceae]	P20371.3	RecName: Full=Protocatechuate 3,4-dioxygenase alpha chain; AltName: Full=3,4-PCD	Molecular Function: ferric iron binding (GO:0008199);|Molecular Function: protocatechuate 3,4-dioxygenase activity (GO:0018578);|Biological Process: beta-ketoadipate pathway (GO:0042952);	ron:TE10_13335	K00448	pcaG	protocatechuate 3,4-dioxygenase, alpha subunit [EC:1.13.11.3]	ko00362,ko00624	Benzoate degradation|Polycyclic aromatic hydrocarbon degradation	RSc1442	COG3485	Protocatechuate 3,4-dioxygenase beta subunit	[Q]
PHG bin.4
gene1486 1518107 1518727 k141_273678_length_10383_cov_69.0968_5 4353 4973	WP_095097407.1	MULTISPECIES: protocatechuate 3,4-dioxygenase subunit alpha [Enterobacteriaceae]	P20371.3	RecName: Full=Protocatechuate 3,4-dioxygenase alpha chain; AltName: Full=3,4-PCD	Molecular Function: ferric iron binding (GO:0008199);|Molecular Function: protocatechuate 3,4-dioxygenase activity (GO:0018578);|Biological Process: beta-ketoadipate pathway (GO:0042952);	ron:TE10_13335	K00448	pcaG	protocatechuate 3,4-dioxygenase, alpha subunit [EC:1.13.11.3]	ko00362,ko00624	Benzoate degradation|Polycyclic aromatic hydrocarbon degradation	RSc1442	COG3485	Protocatechuate 3,4-dioxygenase beta subunit	[Q]
AHG_bin.1
gene5017 5344502 5344206 k141_79238_length_3321_cov_55.2557_5 3321 3025	WP_004857568.1	MULTISPECIES: 3,4-dihydroxyphenylacetate 2,3-dioxygenase [Enterobacteriaceae]	Q05353.2	RecName: Full=3,4-dihydroxyphenylacetate 2,3-dioxygenase; AltName: Full=Homoprotocatechuate 2,3-dioxygenase; Short=HPC dioxygenase	Molecular Function: ferrous iron binding (GO:0008198);|Molecular Function: 3,4-dihydroxyphenylacetate 2,3-dioxygenase activity (GO:0008687);|Biological Process: aromatic compound catabolic process (GO:0019439);	ron:TE10_05485	K00455	hpaD, hpcB	3,4-dihydroxyphenylacetate 2,3-dioxygenase [EC:1.13.11.15]	ko00350	Tyrosine metabolism	STM1103	COG3384	Uncharacterized conserved protein	[S]
FG bin.1
gene3732 3941316 3940459 k141_558636_length_8160_cov_73.5790_7 6207 5350	WP_095103999.1	MULTISPECIES: 3,4-dihydroxyphenylacetate 2,3-dioxygenase [Enterobacteriaceae]	Q05353.2	RecName: Full=3,4-dihydroxyphenylacetate 2,3-dioxygenase; AltName: Full=Homoprotocatechuate 2,3-dioxygenase; Short=HPC dioxygenase	Molecular Function: ferrous iron binding (GO:0008198);|Molecular Function: 3,4-dihydroxyphenylacetate 2,3-dioxygenase activity (GO:0008687);|Biological Process: aromatic compound catabolic process (GO:0019439);	ror:RORB6_15535	K00455	hpaD, hpcB	3,4-dihydroxyphenylacetate 2,3-dioxygenase [EC:1.13.11.15]	ko00350	Tyrosine metabolism	STM1103	COG3384	Uncharacterized conserved protein	[S]
MG bin.1
gene0724 749867 749010 k141_367750_length_23152_cov_11.0000_17 17925 17068	WP_095103999.1	MULTISPECIES: 3,4-dihydroxyphenylacetate 2,3-dioxygenase [Enterobacteriaceae]	Q05353.2	RecName: Full=3,4-dihydroxyphenylacetate 2,3-dioxygenase; AltName: Full=Homoprotocatechuate 2,3-dioxygenase; Short=HPC dioxygenase	Molecular Function: ferrous iron binding (GO:0008198);|Molecular Function: 3,4-dihydroxyphenylacetate 2,3-dioxygenase activity (GO:0008687);|Biological Process: aromatic compound catabolic process (GO:0019439);	ror:RORB6_15535	K00455	hpaD, hpcB	3,4-dihydroxyphenylacetate 2,3-dioxygenase [EC:1.13.11.15]	ko00350	Tyrosine metabolism	STM1103	COG3384	Uncharacterized conserved protein	[S]
PHG bin.4
gene3207 3208499 3209356 k141_300026_length_5146_cov_104.1928_4 2401 3258	WP_095103999.1	MULTISPECIES: 3,4-dihydroxyphenylacetate 2,3-dioxygenase [Enterobacteriaceae]	Q05353.2	RecName: Full=3,4-dihydroxyphenylacetate 2,3-dioxygenase; AltName: Full=Homoprotocatechuate 2,3-dioxygenase; Short=HPC dioxygenase	Molecular Function: ferrous iron binding (GO:0008198);|Molecular Function: 3,4-dihydroxyphenylacetate 2,3-dioxygenase activity (GO:0008687);|Biological Process: aromatic compound catabolic process (GO:0019439);	ror:RORB6_15535	K00455	hpaD, hpcB	3,4-dihydroxyphenylacetate 2,3-dioxygenase [EC:1.13.11.15]	ko00350	Tyrosine metabolism	STM1103	COG3384	Uncharacterized conserved protein	[S]
PHG bin.3
gene4200 4290371 4289490 k141_559922_length_4287_cov_10.0000_3 1590 709	WP_004914293.1	MULTISPECIES: 3,4-dihydroxyphenylacetate 2,3-dioxygenase [Providencia]	Q05353.2	RecName: Full=3,4-dihydroxyphenylacetate 2,3-dioxygenase; AltName: Full=Homoprotocatechuate 2,3-dioxygenase; Short=HPC dioxygenase	Molecular Function: ferrous iron binding (GO:0008198);|Molecular Function: 3,4-dihydroxyphenylacetate 2,3-dioxygenase activity (GO:0008687);|Biological Process: aromatic compound catabolic process (GO:0019439);	psx:DR96_1980	K00455	hpaD, hpcB	3,4-dihydroxyphenylacetate 2,3-dioxygenase [EC:1.13.11.15]	ko00350	Tyrosine metabolism	STM1103	COG3384	Uncharacterized conserved protein	[S]
Catechol dioxygenase
AHG bin.5
gene1674 1793674 1794501 k141_370528_length_10029_cov_16.0085_4 3707 4534	WP_016624976.1	glyoxalase [Enterococcus faecalis]				efu:HMPREF0351_12318	K07104	catE	catechol 2,3-dioxygenase [EC:1.13.11.2]	ko00361,ko00362,ko00622,ko00643	Chlorocyclohexane and chlorobenzene degradation|Benzoate degradation|Xylene degradation|Styrene degradation	SP0073	COG2514	Predicted ring-cleavage extradiol dioxygenase	[R]
PHG bin.9
gene0540 627687 626818 k141_356714_length_57715_cov_44.9815_38 44068 43199	WP_016181685.1	MULTISPECIES: VOC family protein [Enterococcus]	P54721.2	RecName: Full=Catechol-2,3-dioxygenase; AltName: Full=Catechol-induced ring cleavage extradiol dioxygenase	Molecular Function: ferrous iron binding (GO:0008198);|Biological Process: response to toxic substance (GO:0009636);|Molecular Function: catechol 2,3-dioxygenase activity (GO:0018577);|Biological Process: aromatic compound catabolic process (GO:0019439);	ega:AL523_11745	K07104	catE	catechol 2,3-dioxygenase [EC:1.13.11.2]	ko00361,ko00362,ko00622,ko00643	Chlorocyclohexane and chlorobenzene degradation|Benzoate degradation|Xylene degradation|Styrene degradation	BH3305	COG2514	Predicted ring-cleavage extradiol dioxygenase	[R]
gene2371 2635331 2636158 k141_121093_length_13188_cov_94.8297_4 3680 4507	WP_016624976.1	glyoxalase [Enterococcus faecalis]				efu:HMPREF0351_12318	K07104	catE	catechol 2,3-dioxygenase [EC:1.13.11.2]	ko00361,ko00362,ko00622,ko00643	Chlorocyclohexane and chlorobenzene degradation|Benzoate degradation|Xylene degradation|Styrene degradation	SP0073	COG2514	Predicted ring-cleavage extradiol dioxygenase	[R]
AHG_bin.1
gene4397 4716558 4715560 k141_509674_length_12717_cov_46.9505_6 6692 5694	WP_095099636.1	MULTISPECIES: extradiol dioxygenase [Enterobacteriaceae]	A0R1T3.2	RecName: Full=2,3-dihydroxyphenylpropionate/2,3-dihydroxicinnamic acid 1,2-dioxygenase; AltName: Full=3-carboxyethylcatechol 2,3-dioxygenase	Molecular Function: ferrous iron binding (GO:0008198);|Biological Process: 3-phenylpropionate catabolic process (GO:0019380);|Molecular Function: 3-carboxyethylcatechol 2,3-dioxygenase activity (GO:0047070);	sod:Sant_0204	K05713	mhpB	2,3-dihydroxyphenylpropionate 1,2-dioxygenase [EC:1.13.11.16]	ko00360	Phenylalanine metabolism
FG bin.1
gene1304 1392085 1393083 k141_151826_length_22915_cov_64.9621_10 8500 9498	WP_095099636.1	MULTISPECIES: extradiol dioxygenase [Enterobacteriaceae]	A0R1T3.2	RecName: Full=2,3-dihydroxyphenylpropionate/2,3-dihydroxicinnamic acid 1,2-dioxygenase; AltName: Full=3-carboxyethylcatechol 2,3-dioxygenase	Molecular Function: ferrous iron binding (GO:0008198);|Biological Process: 3-phenylpropionate catabolic process (GO:0019380);|Molecular Function: 3-carboxyethylcatechol 2,3-dioxygenase activity (GO:0047070);	sod:Sant_0204	K05713	mhpB	2,3-dihydroxyphenylpropionate 1,2-dioxygenase [EC:1.13.11.16]	ko00360	Phenylalanine metabolism
MG bin.1
gene0486 512774 511776 k141_517662_length_25408_cov_15.8508_2 1945 947	WP_095099636.1	MULTISPECIES: extradiol dioxygenase [Enterobacteriaceae]	A0R1T3.2	RecName: Full=2,3-dihydroxyphenylpropionate/2,3-dihydroxicinnamic acid 1,2-dioxygenase; AltName: Full=3-carboxyethylcatechol 2,3-dioxygenase	Molecular Function: ferrous iron binding (GO:0008198);|Biological Process: 3-phenylpropionate catabolic process (GO:0019380);|Molecular Function: 3-carboxyethylcatechol 2,3-dioxygenase activity (GO:0047070);	sod:Sant_0204	K05713	mhpB	2,3-dihydroxyphenylpropionate 1,2-dioxygenase [EC:1.13.11.16]	ko00360	Phenylalanine metabolism
PHG bin.4
gene3071 3090874 3091872 k141_202112_length_5420_cov_90.9167_2 674 1672	WP_095099636.1	MULTISPECIES: extradiol dioxygenase [Enterobacteriaceae]	A0R1T3.2	RecName: Full=2,3-dihydroxyphenylpropionate/2,3-dihydroxicinnamic acid 1,2-dioxygenase; AltName: Full=3-carboxyethylcatechol 2,3-dioxygenase	Molecular Function: ferrous iron binding (GO:0008198);|Biological Process: 3-phenylpropionate catabolic process (GO:0019380);|Molecular Function: 3-carboxyethylcatechol 2,3-dioxygenase activity (GO:0047070);	sod:Sant_0204	K05713	mhpB	2,3-dihydroxyphenylpropionate 1,2-dioxygenase [EC:1.13.11.16]	ko00360	Phenylalanine metabolism
	苯甲酸酯加双氧酶	Benzoate dioxygenase
AHG_bin.1
gene1045 1125883 1124846 k141_473671_length_56391_cov_41.0319_55 55628 54591	WP_095100743.1	MULTISPECIES: gentisate 1,2-dioxygenase [Enterobacteriaceae]	Q7X284.1	RecName: Full=Gentisate 1,2-dioxygenase; Short=GDO	Biological Process: aromatic compound catabolic process (GO:0019439);|Molecular Function: gentisate 1,2-dioxygenase activity (GO:0047922);	ron:TE10_19740	K00450	E1.13.11.4	gentisate 1,2-dioxygenase [EC:1.13.11.4]	ko00350	Tyrosine metabolism	ECs3030	COG3435	Gentisate 1,2-dioxygenase	[Q]
Aromatic ring open chain plus dioxygenase
Xylose isomerase
AHG_bin.1
gene0759 820054 821376 k141_493839_length_64794_cov_55.0123_50 54132 55454	WP_095102751.1	MULTISPECIES: xylose isomerase [Enterobacteriaceae]	P29442.1	RecName: Full=Xylose isomerase; Short=XI	Cellular Component: cytoplasm (GO:0005737);|Biological Process: pentose-phosphate shunt (GO:0006098);|Molecular Function: xylose isomerase activity (GO:0009045);|Biological Process: D-xylose metabolic process (GO:0042732);|Molecular Function: metal ion binding (GO:0046872);	ron:TE10_01275	K01805	xylA	xylose isomerase [EC:5.3.1.5]	ko00040,ko00051	Pentose and glucuronate interconversions|Fructose and mannose metabolism	STM3661	COG2115	Xylose isomerase	[G]
FG bin.1
gene1881 2017257 2018579 k141_63245_length_18487_cov_63.8238_3 1526 2848	WP_095102751.1	MULTISPECIES: xylose isomerase [Enterobacteriaceae]	P29442.1	RecName: Full=Xylose isomerase; Short=XI	Cellular Component: cytoplasm (GO:0005737);|Biological Process: pentose-phosphate shunt (GO:0006098);|Molecular Function: xylose isomerase activity (GO:0009045);|Biological Process: D-xylose metabolic process (GO:0042732);|Molecular Function: metal ion binding (GO:0046872);	ron:TE10_01275	K01805	xylA	xylose isomerase [EC:5.3.1.5]	ko00040,ko00051	Pentose and glucuronate interconversions|Fructose and mannose metabolism	STM3661	COG2115	Xylose isomerase	[G]
MG bin.1
gene4806 4766829 4768151 k141_330015_length_5204_cov_14.0000_4 3634 4956	WP_095102751.1	MULTISPECIES: xylose isomerase [Enterobacteriaceae]	P29442.1	RecName: Full=Xylose isomerase; Short=XI	Cellular Component: cytoplasm (GO:0005737);|Biological Process: pentose-phosphate shunt (GO:0006098);|Molecular Function: xylose isomerase activity (GO:0009045);|Biological Process: D-xylose metabolic process (GO:0042732);|Molecular Function: metal ion binding (GO:0046872);	ron:TE10_01275	K01805	xylA	xylose isomerase [EC:5.3.1.5]	ko00040,ko00051	Pentose and glucuronate interconversions|Fructose and mannose metabolism	STM3661	COG2115	Xylose isomerase	[G]
PHG bin.2
gene2272 2595138 2593822 k141_776106_length_206780_cov_29.5341_47 40020 38704	WP_026626867.1	xylose isomerase [Dysgonomonas capnocytophagoides]	A6L792.1	RecName: Full=Xylose isomerase	Cellular Component: cytoplasm (GO:0005737);|Biological Process: pentose-phosphate shunt (GO:0006098);|Molecular Function: xylose isomerase activity (GO:0009045);|Biological Process: D-xylose metabolic process (GO:0042732);|Molecular Function: metal ion binding (GO:0046872);	bdo:EL88_13965	K01805	xylA	xylose isomerase [EC:5.3.1.5]	ko00040,ko00051	Pentose and glucuronate interconversions|Fructose and mannose metabolism	SMc03163	COG2115	Xylose isomerase	[G]
PHG bin.4
gene0381 380320 378998 k141_233531_length_20099_cov_83.8492 1393 71	WP_095102751.1	MULTISPECIES: xylose isomerase [Enterobacteriaceae]	P29442.1	RecName: Full=Xylose isomerase; Short=XI	Cellular Component: cytoplasm (GO:0005737);|Biological Process: pentose-phosphate shunt (GO:0006098);|Molecular Function: xylose isomerase activity (GO:0009045);|Biological Process: D-xylose metabolic process (GO:0042732);|Molecular Function: metal ion binding (GO:0046872);	ron:TE10_01275	K01805	xylA	xylose isomerase [EC:5.3.1.5]	ko00040,ko00051	Pentose and glucuronate interconversions|Fructose and mannose metabolism	STM3661	COG2115	Xylose isomerase	[G]
PHG bin.6
gene3020 2766841 2765516 k141_605057_length_6407_cov_41.5610_6 5886 4561	WP_139538312.1	xylose isomerase [Klebsiella michiganensis]	Q8ZL90.1	RecName: Full=Xylose isomerase	Cellular Component: cytoplasm (GO:0005737);|Biological Process: pentose-phosphate shunt (GO:0006098);|Molecular Function: xylose isomerase activity (GO:0009045);|Biological Process: D-xylose catabolic process (GO:0042843);|Molecular Function: metal ion binding (GO:0046872);	kom:HR38_04120	K01805	xylA	xylose isomerase [EC:5.3.1.5]	ko00040,ko00051	Pentose and glucuronate interconversions|Fructose and mannose metabolism	STM3661	COG2115	Xylose isomerase	[G]
Xylulose kinase
AHG_bin.1
gene4087 4384751 4383549 k141_37612_length_16492_cov_59.9500_8 8771 7569	WP_095103649.1	MULTISPECIES: 1-deoxy-D-xylulose-5-phosphate reductoisomerase [Enterobacteriaceae]	Q8X8Y1.1	RecName: Full=1-deoxy-D-xylulose 5-phosphate reductoisomerase; Short=DXP reductoisomerase; AltName: Full=1-deoxyxylulose-5-phosphate reductoisomerase; AltName: Full=2-C-methyl-D-erythritol 4-phosphate synthase	Biological Process: isopentenyl diphosphate biosynthetic process, methylerythritol 4-phosphate pathway (GO:0019288);|Molecular Function: 1-deoxy-D-xylulose-5-phosphate reductoisomerase activity (GO:0030604);|Molecular Function: metal ion binding (GO:0046872);|Molecular Function: NADPH binding (GO:0070402);	ron:TE10_06675	K00099	dxr	1-deoxy-D-xylulose-5-phosphate reductoisomerase [EC:1.1.1.267]	ko00900	Terpenoid backbone biosynthesis	ZyaeM	COG0743	1-deoxy-D-xylulose 5-phosphate reductoisomerase	[I]
AHG bin.4
gene0207 234932 233736 k141_401652_length_30473_cov_50.7041_25 26935 25739	WP_095847455.1	1-deoxy-D-xylulose-5-phosphate reductoisomerase [Gibbsiella quercinecans]	A8GIE2.1	RecName: Full=1-deoxy-D-xylulose 5-phosphate reductoisomerase; Short=DXP reductoisomerase; AltName: Full=1-deoxyxylulose-5-phosphate reductoisomerase; AltName: Full=2-C-methyl-D-erythritol 4-phosphate synthase	Biological Process: isopentenyl diphosphate biosynthetic process, methylerythritol 4-phosphate pathway (GO:0019288);|Molecular Function: 1-deoxy-D-xylulose-5-phosphate reductoisomerase activity (GO:0030604);|Molecular Function: metal ion binding (GO:0046872);|Molecular Function: NADPH binding (GO:0070402);	srs:SerAS12_3976	K00099	dxr	1-deoxy-D-xylulose-5-phosphate reductoisomerase [EC:1.1.1.267]	ko00900	Terpenoid backbone biosynthesis	YPO1048	COG0743	1-deoxy-D-xylulose 5-phosphate reductoisomerase	[I]
FG bin.1
gene0645 701977 703179 k141_79606_length_34817_cov_64.5369_21 22888 24090	WP_095103649.1	MULTISPECIES: 1-deoxy-D-xylulose-5-phosphate reductoisomerase [Enterobacteriaceae]	Q8X8Y1.1	RecName: Full=1-deoxy-D-xylulose 5-phosphate reductoisomerase; Short=DXP reductoisomerase; AltName: Full=1-deoxyxylulose-5-phosphate reductoisomerase; AltName: Full=2-C-methyl-D-erythritol 4-phosphate synthase	Biological Process: isopentenyl diphosphate biosynthetic process, methylerythritol 4-phosphate pathway (GO:0019288);|Molecular Function: 1-deoxy-D-xylulose-5-phosphate reductoisomerase activity (GO:0030604);|Molecular Function: metal ion binding (GO:0046872);|Molecular Function: NADPH binding (GO:0070402);	ron:TE10_06675	K00099	dxr	1-deoxy-D-xylulose-5-phosphate reductoisomerase [EC:1.1.1.267]	ko00900	Terpenoid backbone biosynthesis	ZyaeM	COG0743	1-deoxy-D-xylulose 5-phosphate reductoisomerase	[I]
MG bin.1
gene4089 4073361 4072159 k141_437066_length_7223_cov_13.0000_2 2350 1148	WP_095103649.1	MULTISPECIES: 1-deoxy-D-xylulose-5-phosphate reductoisomerase [Enterobacteriaceae]	Q8X8Y1.1	RecName: Full=1-deoxy-D-xylulose 5-phosphate reductoisomerase; Short=DXP reductoisomerase; AltName: Full=1-deoxyxylulose-5-phosphate reductoisomerase; AltName: Full=2-C-methyl-D-erythritol 4-phosphate synthase	Biological Process: isopentenyl diphosphate biosynthetic process, methylerythritol 4-phosphate pathway (GO:0019288);|Molecular Function: 1-deoxy-D-xylulose-5-phosphate reductoisomerase activity (GO:0030604);|Molecular Function: metal ion binding (GO:0046872);|Molecular Function: NADPH binding (GO:0070402);	ron:TE10_06675	K00099	dxr	1-deoxy-D-xylulose-5-phosphate reductoisomerase [EC:1.1.1.267]	ko00900	Terpenoid backbone biosynthesis	ZyaeM	COG0743	1-deoxy-D-xylulose 5-phosphate reductoisomerase	[I]
PHG bin.2
gene1333 1548248 1549399 k141_700252_length_295465_cov_28.0013_37 38859 40010	WP_165045472.1	1-deoxy-D-xylulose-5-phosphate reductoisomerase [Dysgonomonas sp. ZJ709]	Q8A684.1	RecName: Full=1-deoxy-D-xylulose 5-phosphate reductoisomerase; Short=DXP reductoisomerase; AltName: Full=1-deoxyxylulose-5-phosphate reductoisomerase; AltName: Full=2-C-methyl-D-erythritol 4-phosphate synthase	Molecular Function: manganese ion binding (GO:0030145);|Molecular Function: 1-deoxy-D-xylulose-5-phosphate reductoisomerase activity (GO:0030604);|Biological Process: isopentenyl diphosphate biosynthetic process, methylerythritol 4-phosphate pathway involved in terpenoid biosynthetic process (GO:0051484);|Molecular Function: NADPH binding (GO:0070402);	pdi:BDI_0480	K00099	dxr	1-deoxy-D-xylulose-5-phosphate reductoisomerase [EC:1.1.1.267]	ko00900	Terpenoid backbone biosynthesis	BS_yluB	COG0743	1-deoxy-D-xylulose 5-phosphate reductoisomerase	[I]
PHG bin.3
gene1878 1998085 1996892 k141_841022_length_10879_cov_10.0000_10 10154 8961	WP_004908768.1	MULTISPECIES: 1-deoxy-D-xylulose-5-phosphate reductoisomerase [Providencia]	Q7N8P3.1	RecName: Full=1-deoxy-D-xylulose 5-phosphate reductoisomerase; Short=DXP reductoisomerase; AltName: Full=1-deoxyxylulose-5-phosphate reductoisomerase; AltName: Full=2-C-methyl-D-erythritol 4-phosphate synthase	Biological Process: isopentenyl diphosphate biosynthetic process, methylerythritol 4-phosphate pathway (GO:0019288);|Molecular Function: 1-deoxy-D-xylulose-5-phosphate reductoisomerase activity (GO:0030604);|Molecular Function: metal ion binding (GO:0046872);|Molecular Function: NADPH binding (GO:0070402);	psi:S70_15035	K00099	dxr	1-deoxy-D-xylulose-5-phosphate reductoisomerase [EC:1.1.1.267]	ko00900	Terpenoid backbone biosynthesis	YPO1048	COG0743	1-deoxy-D-xylulose 5-phosphate reductoisomerase	[I]
PHG bin.4
gene2899 2928824 2927895 k141_63516_length_5720_cov_78.8018_5 5719 4790	WP_095103649.1	MULTISPECIES: 1-deoxy-D-xylulose-5-phosphate reductoisomerase [Enterobacteriaceae]	Q8X8Y1.1	RecName: Full=1-deoxy-D-xylulose 5-phosphate reductoisomerase; Short=DXP reductoisomerase; AltName: Full=1-deoxyxylulose-5-phosphate reductoisomerase; AltName: Full=2-C-methyl-D-erythritol 4-phosphate synthase	Biological Process: isopentenyl diphosphate biosynthetic process, methylerythritol 4-phosphate pathway (GO:0019288);|Molecular Function: 1-deoxy-D-xylulose-5-phosphate reductoisomerase activity (GO:0030604);|Molecular Function: metal ion binding (GO:0046872);|Molecular Function: NADPH binding (GO:0070402);	ron:TE10_06675	K00099	dxr	1-deoxy-D-xylulose-5-phosphate reductoisomerase [EC:1.1.1.267]	ko00900	Terpenoid backbone biosynthesis	ZyaeM	COG0743	1-deoxy-D-xylulose 5-phosphate reductoisomerase	[I]
PHG bin.6
gene4503 4123568 4122513 k141_593040_length_4355_cov_32.0000_4 4354 3299	WP_154931142.1	1-deoxy-D-xylulose-5-phosphate reductoisomerase [Klebsiella oxytoca]	Q8X8Y1.1	RecName: Full=1-deoxy-D-xylulose 5-phosphate reductoisomerase; Short=DXP reductoisomerase; AltName: Full=1-deoxyxylulose-5-phosphate reductoisomerase; AltName: Full=2-C-methyl-D-erythritol 4-phosphate synthase	Biological Process: isopentenyl diphosphate biosynthetic process, methylerythritol 4-phosphate pathway (GO:0019288);|Molecular Function: 1-deoxy-D-xylulose-5-phosphate reductoisomerase activity (GO:0030604);|Molecular Function: metal ion binding (GO:0046872);|Molecular Function: NADPH binding (GO:0070402);	eae:EAE_11660	K00099	dxr	1-deoxy-D-xylulose-5-phosphate reductoisomerase [EC:1.1.1.267]	ko00900	Terpenoid backbone biosynthesis	ZyaeM	COG0743	1-deoxy-D-xylulose 5-phosphate reductoisomerase	[I]
AHG_bin.1
gene3721 3995527 3994697 k141_402948_length_19722_cov_47.5140 833 3	WP_115193458.1	1-deoxy-D-xylulose-5-phosphate synthase [Raoultella terrigena]	B5Y0X1.1	RecName: Full=1-deoxy-D-xylulose-5-phosphate synthase; AltName: Full=1-deoxyxylulose-5-phosphate synthase; Short=DXP synthase; Short=DXPS	Molecular Function: 1-deoxy-D-xylulose-5-phosphate synthase activity (GO:0008661);|Biological Process: thiamine biosynthetic process (GO:0009228);|Biological Process: terpenoid biosynthetic process (GO:0016114);|Molecular Function: metal ion binding (GO:0046872);|Biological Process: 1-deoxy-D-xylulose 5-phosphate biosynthetic process (GO:0052865);	ror:RORB6_13360	K01662	dxs	1-deoxy-D-xylulose-5-phosphate synthase [EC:2.2.1.7]	ko00730,ko00900	Thiamine metabolism|Terpenoid backbone biosynthesis	Zdxs	COG1154	Deoxyxylulose-5-phosphate synthase	[HI]
gene4245 4560464 4561633 k141_45923_length_14056_cov_83.5879 2 1171	WP_095094361.1	MULTISPECIES: 1-deoxy-D-xylulose-5-phosphate synthase [Enterobacteriaceae]	B5Y0X1.1	RecName: Full=1-deoxy-D-xylulose-5-phosphate synthase; AltName: Full=1-deoxyxylulose-5-phosphate synthase; Short=DXP synthase; Short=DXPS	Molecular Function: 1-deoxy-D-xylulose-5-phosphate synthase activity (GO:0008661);|Biological Process: thiamine biosynthetic process (GO:0009228);|Biological Process: terpenoid biosynthetic process (GO:0016114);|Molecular Function: metal ion binding (GO:0046872);|Biological Process: 1-deoxy-D-xylulose 5-phosphate biosynthetic process (GO:0052865);	ron:TE10_07620	K01662	dxs	1-deoxy-D-xylulose-5-phosphate synthase [EC:2.2.1.7]	ko00730,ko00900	Thiamine metabolism|Terpenoid backbone biosynthesis	dxs	COG1154	Deoxyxylulose-5-phosphate synthase	[HI]
AHG bin.4
gene1926 2077534 2079399 k141_374244_length_8800_cov_209.5588_6 4680 6545	WP_121554165.1	1-deoxy-D-xylulose-5-phosphate synthase [Gibbsiella quercinecans]	A8GAP2.1	RecName: Full=1-deoxy-D-xylulose-5-phosphate synthase; AltName: Full=1-deoxyxylulose-5-phosphate synthase; Short=DXP synthase; Short=DXPS	Molecular Function: 1-deoxy-D-xylulose-5-phosphate synthase activity (GO:0008661);|Biological Process: thiamine biosynthetic process (GO:0009228);|Biological Process: terpenoid biosynthetic process (GO:0016114);|Molecular Function: metal ion binding (GO:0046872);|Biological Process: 1-deoxy-D-xylulose 5-phosphate biosynthetic process (GO:0052865);	serf:L085_23445	K01662	dxs	1-deoxy-D-xylulose-5-phosphate synthase [EC:2.2.1.7]	ko00730,ko00900	Thiamine metabolism|Terpenoid backbone biosynthesis	YPO3177	COG1154	Deoxyxylulose-5-phosphate synthase	[HI]
FG bin.1
gene3563 3772108 3773454 k141_351753_length_8776_cov_66.7151_9 7428 8774	WP_115193458.1	1-deoxy-D-xylulose-5-phosphate synthase [Raoultella terrigena]	B5Y0X1.1	RecName: Full=1-deoxy-D-xylulose-5-phosphate synthase; AltName: Full=1-deoxyxylulose-5-phosphate synthase; Short=DXP synthase; Short=DXPS	Molecular Function: 1-deoxy-D-xylulose-5-phosphate synthase activity (GO:0008661);|Biological Process: thiamine biosynthetic process (GO:0009228);|Biological Process: terpenoid biosynthetic process (GO:0016114);|Molecular Function: metal ion binding (GO:0046872);|Biological Process: 1-deoxy-D-xylulose 5-phosphate biosynthetic process (GO:0052865);	ron:TE10_07620	K01662	dxs	1-deoxy-D-xylulose-5-phosphate synthase [EC:2.2.1.7]	ko00730,ko00900	Thiamine metabolism|Terpenoid backbone biosynthesis	Zdxs	COG1154	Deoxyxylulose-5-phosphate synthase	[HI]
gene3842 4045979 4045467 k141_173140_length_7701_cov_61.0000_10 7700 7188	WP_095094361.1	MULTISPECIES: 1-deoxy-D-xylulose-5-phosphate synthase [Enterobacteriaceae]	A6T5F3.1	RecName: Full=1-deoxy-D-xylulose-5-phosphate synthase; AltName: Full=1-deoxyxylulose-5-phosphate synthase; Short=DXP synthase; Short=DXPS	Molecular Function: 1-deoxy-D-xylulose-5-phosphate synthase activity (GO:0008661);|Biological Process: thiamine biosynthetic process (GO:0009228);|Biological Process: terpenoid biosynthetic process (GO:0016114);|Molecular Function: metal ion binding (GO:0046872);|Biological Process: 1-deoxy-D-xylulose 5-phosphate biosynthetic process (GO:0052865);	ron:TE10_07620	K01662	dxs	1-deoxy-D-xylulose-5-phosphate synthase [EC:2.2.1.7]	ko00730,ko00900	Thiamine metabolism|Terpenoid backbone biosynthesis	dxs	COG1154	Deoxyxylulose-5-phosphate synthase	[HI]
MG bin.1
gene2851 2858084 2856222 k141_575524_length_11026_cov_9.0000_13 10639 8777	WP_095094361.1	MULTISPECIES: 1-deoxy-D-xylulose-5-phosphate synthase [Enterobacteriaceae]	B5Y0X1.1	RecName: Full=1-deoxy-D-xylulose-5-phosphate synthase; AltName: Full=1-deoxyxylulose-5-phosphate synthase; Short=DXP synthase; Short=DXPS	Molecular Function: 1-deoxy-D-xylulose-5-phosphate synthase activity (GO:0008661);|Biological Process: thiamine biosynthetic process (GO:0009228);|Biological Process: terpenoid biosynthetic process (GO:0016114);|Molecular Function: metal ion binding (GO:0046872);|Biological Process: 1-deoxy-D-xylulose 5-phosphate biosynthetic process (GO:0052865);	ron:TE10_07620	K01662	dxs	1-deoxy-D-xylulose-5-phosphate synthase [EC:2.2.1.7]	ko00730,ko00900	Thiamine metabolism|Terpenoid backbone biosynthesis	dxs	COG1154	Deoxyxylulose-5-phosphate synthase	[HI]
PHG bin.2
gene0666 789488 787509 k141_313111_length_415938_cov_34.1247_69 101358 99379	WP_165020947.1	1-deoxy-D-xylulose-5-phosphate synthase [Dysgonomonas sp. ZJ279]	A6LFB9.1	RecName: Full=1-deoxy-D-xylulose-5-phosphate synthase; AltName: Full=1-deoxyxylulose-5-phosphate synthase; Short=DXP synthase; Short=DXPS	Molecular Function: 1-deoxy-D-xylulose-5-phosphate synthase activity (GO:0008661);|Biological Process: thiamine biosynthetic process (GO:0009228);|Biological Process: terpenoid biosynthetic process (GO:0016114);|Molecular Function: metal ion binding (GO:0046872);|Biological Process: 1-deoxy-D-xylulose 5-phosphate biosynthetic process (GO:0052865);	pbt:ING2E5B_1127	K01662	dxs	1-deoxy-D-xylulose-5-phosphate synthase [EC:2.2.1.7]	ko00730,ko00900	Thiamine metabolism|Terpenoid backbone biosynthesis	aq_881	COG1154	Deoxyxylulose-5-phosphate synthase	[HI]
PHG bin.3
gene0542 577795 579660 k141_119806_length_20688_cov_12.0000_4 2092 3957	WP_004914577.1	MULTISPECIES: 1-deoxy-D-xylulose-5-phosphate synthase [Providencia]	Q7N0J7.1	RecName: Full=1-deoxy-D-xylulose-5-phosphate synthase; AltName: Full=1-deoxyxylulose-5-phosphate synthase; Short=DXP synthase; Short=DXPS	Molecular Function: 1-deoxy-D-xylulose-5-phosphate synthase activity (GO:0008661);|Biological Process: thiamine biosynthetic process (GO:0009228);|Biological Process: terpenoid biosynthetic process (GO:0016114);|Molecular Function: metal ion binding (GO:0046872);|Biological Process: 1-deoxy-D-xylulose 5-phosphate biosynthetic process (GO:0052865);	psi:S70_06865	K01662	dxs	1-deoxy-D-xylulose-5-phosphate synthase [EC:2.2.1.7]	ko00730,ko00900	Thiamine metabolism|Terpenoid backbone biosynthesis	dxs	COG1154	Deoxyxylulose-5-phosphate synthase	[HI]
PHG bin.4
gene3871 3848220 3849278 k141_138928_length_3747_cov_82.2493_4 2687 3745	WP_115193458.1	1-deoxy-D-xylulose-5-phosphate synthase [Raoultella terrigena]	B5Y0X1.1	RecName: Full=1-deoxy-D-xylulose-5-phosphate synthase; AltName: Full=1-deoxyxylulose-5-phosphate synthase; Short=DXP synthase; Short=DXPS	Molecular Function: 1-deoxy-D-xylulose-5-phosphate synthase activity (GO:0008661);|Biological Process: thiamine biosynthetic process (GO:0009228);|Biological Process: terpenoid biosynthetic process (GO:0016114);|Molecular Function: metal ion binding (GO:0046872);|Biological Process: 1-deoxy-D-xylulose 5-phosphate biosynthetic process (GO:0052865);	ror:RORB6_13360	K01662	dxs	1-deoxy-D-xylulose-5-phosphate synthase [EC:2.2.1.7]	ko00730,ko00900	Thiamine metabolism|Terpenoid backbone biosynthesis	Zdxs	COG1154	Deoxyxylulose-5-phosphate synthase	[HI]
gene4569 4459378 4458437 k141_372926_length_2130_cov_66.1041_3 2129 1188	WP_095094361.1	MULTISPECIES: 1-deoxy-D-xylulose-5-phosphate synthase [Enterobacteriaceae]	B5Y0X1.1	RecName: Full=1-deoxy-D-xylulose-5-phosphate synthase; AltName: Full=1-deoxyxylulose-5-phosphate synthase; Short=DXP synthase; Short=DXPS	Molecular Function: 1-deoxy-D-xylulose-5-phosphate synthase activity (GO:0008661);|Biological Process: thiamine biosynthetic process (GO:0009228);|Biological Process: terpenoid biosynthetic process (GO:0016114);|Molecular Function: metal ion binding (GO:0046872);|Biological Process: 1-deoxy-D-xylulose 5-phosphate biosynthetic process (GO:0052865);	ron:TE10_07620	K01662	dxs	1-deoxy-D-xylulose-5-phosphate synthase [EC:2.2.1.7]	ko00730,ko00900	Thiamine metabolism|Terpenoid backbone biosynthesis	dxs	COG1154	Deoxyxylulose-5-phosphate synthase	[HI]
PHG bin.6
gene4626 4236624 4234762 k141_584912_length_4141_cov_30.0000_2 2427 565	WP_004129698.1	MULTISPECIES: 1-deoxy-D-xylulose-5-phosphate synthase [Klebsiella]	B5Y0X1.1	RecName: Full=1-deoxy-D-xylulose-5-phosphate synthase; AltName: Full=1-deoxyxylulose-5-phosphate synthase; Short=DXP synthase; Short=DXPS	Molecular Function: 1-deoxy-D-xylulose-5-phosphate synthase activity (GO:0008661);|Biological Process: thiamine biosynthetic process (GO:0009228);|Biological Process: terpenoid biosynthetic process (GO:0016114);|Molecular Function: metal ion binding (GO:0046872);|Biological Process: 1-deoxy-D-xylulose 5-phosphate biosynthetic process (GO:0052865);	kom:HR38_11360	K01662	dxs	1-deoxy-D-xylulose-5-phosphate synthase [EC:2.2.1.7]	ko00730,ko00900	Thiamine metabolism|Terpenoid backbone biosynthesis	STM0422	COG1154	Deoxyxylulose-5-phosphate synthase	[HI]
AHG_bin.1
gene1641 1787558 1786881 k141_31044_length_45117_cov_60.3120_14 13439 12762	WP_095105275.1	MULTISPECIES: ribulose-phosphate 3-epimerase [Enterobacteriaceae]	P0AG09.1	RecName: Full=Ribulose-phosphate 3-epimerase; AltName: Full=Pentose-5-phosphate 3-epimerase; Short=PPE; AltName: Full=R5P3E	Molecular Function: ribulose-phosphate 3-epimerase activity (GO:0004750);|Biological Process: carbohydrate metabolic process (GO:0005975);|Biological Process: pentose-phosphate shunt (GO:0006098);|Molecular Function: metal ion binding (GO:0046872);	ron:TE10_00385	K01783	rpe, RPE	ribulose-phosphate 3-epimerase [EC:5.1.3.1]	ko00030,ko00040,ko00710	Pentose phosphate pathway|Pentose and glucuronate interconversions|Carbon fixation in photosynthetic organisms	STM3483	COG0036	Pentose-5-phosphate-3-epimerase	[G]
AHG bin.4
gene1281 1405983 1406660 k141_53546_length_12587_cov_50.2065_4 3109 3786	WP_095846753.1	ribulose-phosphate 3-epimerase [Gibbsiella quercinecans]	P0AG09.1	RecName: Full=Ribulose-phosphate 3-epimerase; AltName: Full=Pentose-5-phosphate 3-epimerase; Short=PPE; AltName: Full=R5P3E	Molecular Function: ribulose-phosphate 3-epimerase activity (GO:0004750);|Biological Process: carbohydrate metabolic process (GO:0005975);|Biological Process: pentose-phosphate shunt (GO:0006098);|Molecular Function: metal ion binding (GO:0046872);	srr:SerAS9_4693	K01783	rpe, RPE	ribulose-phosphate 3-epimerase [EC:5.1.3.1]	ko00030,ko00040,ko00710	Pentose phosphate pathway|Pentose and glucuronate interconversions|Carbon fixation in photosynthetic organisms	STM3483	COG0036	Pentose-5-phosphate-3-epimerase	[G]
AHG bin.5
gene0326 352055 352708 k141_147050_length_30181_cov_18.0000_23 22629 23282	WP_156234028.1	ribulose-phosphate 3-epimerase [Enterococcus gallinarum]	O34557.1	RecName: Full=Ribulose-phosphate 3-epimerase; AltName: Full=Pentose-5-phosphate 3-epimerase; Short=PPE; AltName: Full=R5P3E	Molecular Function: ribulose-phosphate 3-epimerase activity (GO:0004750);|Cellular Component: cytosol (GO:0005829);|Biological Process: pentose-phosphate shunt, non-oxidative branch (GO:0009052);|Biological Process: pentose catabolic process (GO:0019323);|Biological Process: cellular carbohydrate metabolic process (GO:0044262);|Molecular Function: metal ion binding (GO:0046872);	ega:AL523_04840	K01783	rpe, RPE	ribulose-phosphate 3-epimerase [EC:5.1.3.1]	ko00030,ko00040,ko00710	Pentose phosphate pathway|Pentose and glucuronate interconversions|Carbon fixation in photosynthetic organisms	lin1932	COG0036	Pentose-5-phosphate-3-epimerase	[G]
gene2981 3092339 3093052 k141_358762_length_4256_cov_11.0000_2 1580 2293	WP_086286166.1	ribulose-phosphate 3-epimerase [Enterococcus faecium]	Q43843.1	RecName: Full=Ribulose-phosphate 3-epimerase, chloroplastic; AltName: Full=Pentose-5-phosphate 3-epimerase; Short=PPE; AltName: Full=R5P3E; Short=RPE; Flags: Precursor	Molecular Function: ribulose-phosphate 3-epimerase activity (GO:0004750);|Biological Process: pentose-phosphate shunt (GO:0006098);|Cellular Component: chloroplast thylakoid membrane (GO:0009535);|Biological Process: reductive pentose-phosphate cycle (GO:0019253);|Molecular Function: metal ion binding (GO:0046872);	efm:M7W_1508	K01783	rpe, RPE	ribulose-phosphate 3-epimerase [EC:5.1.3.1]	ko00030,ko00040,ko00710	Pentose phosphate pathway|Pentose and glucuronate interconversions|Carbon fixation in photosynthetic organisms	lin1932	COG0036	Pentose-5-phosphate-3-epimerase	[G]
FG bin.1
gene4031 4233571 4234248 k141_385953_length_6823_cov_64.7770_3 1448 2125	WP_095105275.1	MULTISPECIES: ribulose-phosphate 3-epimerase [Enterobacteriaceae]	P0AG09.1	RecName: Full=Ribulose-phosphate 3-epimerase; AltName: Full=Pentose-5-phosphate 3-epimerase; Short=PPE; AltName: Full=R5P3E	Molecular Function: ribulose-phosphate 3-epimerase activity (GO:0004750);|Biological Process: carbohydrate metabolic process (GO:0005975);|Biological Process: pentose-phosphate shunt (GO:0006098);|Molecular Function: metal ion binding (GO:0046872);	ron:TE10_00385	K01783	rpe, RPE	ribulose-phosphate 3-epimerase [EC:5.1.3.1]	ko00030,ko00040,ko00710	Pentose phosphate pathway|Pentose and glucuronate interconversions|Carbon fixation in photosynthetic organisms	STM3483	COG0036	Pentose-5-phosphate-3-epimerase	[G]
FG bin.2
gene0224 244347 244988 k141_198742_length_358147_cov_17.4216_224 244347 244988	AGE95740.1	d-ribulose 5 phosphate 3 epimerase [Encephalitozoon cuniculi]	Q8SRP6.1	RecName: Full=Ribulose-phosphate 3-epimerase; AltName: Full=Pentose-5-phosphate 3-epimerase; Short=PPE; AltName: Full=RPE	Molecular Function: ribulose-phosphate 3-epimerase activity (GO:0004750);|Biological Process: carbohydrate metabolic process (GO:0005975);|Biological Process: pentose-phosphate shunt (GO:0006098);|Molecular Function: metal ion binding (GO:0046872);	ecu:ECU06_1040	K01783	rpe, RPE	ribulose-phosphate 3-epimerase [EC:5.1.3.1]	ko00030,ko00040,ko00710	Pentose phosphate pathway|Pentose and glucuronate interconversions|Carbon fixation in photosynthetic organisms	ECU06g1040	COG0036	Pentose-5-phosphate-3-epimerase	[G]
MG bin.1
gene3166 3180578 3181255 k141_81864_length_9978_cov_14.0000_7 6237 6914	WP_095105275.1	MULTISPECIES: ribulose-phosphate 3-epimerase [Enterobacteriaceae]	P0AG09.1	RecName: Full=Ribulose-phosphate 3-epimerase; AltName: Full=Pentose-5-phosphate 3-epimerase; Short=PPE; AltName: Full=R5P3E	Molecular Function: ribulose-phosphate 3-epimerase activity (GO:0004750);|Biological Process: carbohydrate metabolic process (GO:0005975);|Biological Process: pentose-phosphate shunt (GO:0006098);|Molecular Function: metal ion binding (GO:0046872);	ron:TE10_00385	K01783	rpe, RPE	ribulose-phosphate 3-epimerase [EC:5.1.3.1]	ko00030,ko00040,ko00710	Pentose phosphate pathway|Pentose and glucuronate interconversions|Carbon fixation in photosynthetic organisms	STM3483	COG0036	Pentose-5-phosphate-3-epimerase	[G]
PHG bin.2
gene2012 2329852 2329199 k141_544969_length_246703_cov_25.6337_212 240121 239468	WP_029905911.1	ribulose-phosphate 3-epimerase [Prevotella sp. 10(H)]	O34557.1	RecName: Full=Ribulose-phosphate 3-epimerase; AltName: Full=Pentose-5-phosphate 3-epimerase; Short=PPE; AltName: Full=R5P3E	Molecular Function: ribulose-phosphate 3-epimerase activity (GO:0004750);|Cellular Component: cytosol (GO:0005829);|Biological Process: pentose-phosphate shunt, non-oxidative branch (GO:0009052);|Biological Process: pentose catabolic process (GO:0019323);|Biological Process: cellular carbohydrate metabolic process (GO:0044262);|Molecular Function: metal ion binding (GO:0046872);	pdi:BDI_1695	K01783	rpe, RPE	ribulose-phosphate 3-epimerase [EC:5.1.3.1]	ko00030,ko00040,ko00710	Pentose phosphate pathway|Pentose and glucuronate interconversions|Carbon fixation in photosynthetic organisms	lin1932	COG0036	Pentose-5-phosphate-3-epimerase	[G]
PHG bin.3
gene0974 1033761 1033087 k141_651375_length_15733_cov_10.0000_8 8073 7399	WP_004263207.1	MULTISPECIES: ribulose-phosphate 3-epimerase [Enterobacterales]	P0AG09.1	RecName: Full=Ribulose-phosphate 3-epimerase; AltName: Full=Pentose-5-phosphate 3-epimerase; Short=PPE; AltName: Full=R5P3E	Molecular Function: ribulose-phosphate 3-epimerase activity (GO:0004750);|Biological Process: carbohydrate metabolic process (GO:0005975);|Biological Process: pentose-phosphate shunt (GO:0006098);|Molecular Function: metal ion binding (GO:0046872);	psx:DR96_1178	K01783	rpe, RPE	ribulose-phosphate 3-epimerase [EC:5.1.3.1]	ko00030,ko00040,ko00710	Pentose phosphate pathway|Pentose and glucuronate interconversions|Carbon fixation in photosynthetic organisms	YPO0155	COG0036	Pentose-5-phosphate-3-epimerase	[G]
PHG bin.4
gene1733 1785676 1786353 k141_181452_length_9189_cov_79.2305_6 5612 6289	WP_095105275.1	MULTISPECIES: ribulose-phosphate 3-epimerase [Enterobacteriaceae]	P0AG09.1	RecName: Full=Ribulose-phosphate 3-epimerase; AltName: Full=Pentose-5-phosphate 3-epimerase; Short=PPE; AltName: Full=R5P3E	Molecular Function: ribulose-phosphate 3-epimerase activity (GO:0004750);|Biological Process: carbohydrate metabolic process (GO:0005975);|Biological Process: pentose-phosphate shunt (GO:0006098);|Molecular Function: metal ion binding (GO:0046872);	ron:TE10_00385	K01783	rpe, RPE	ribulose-phosphate 3-epimerase [EC:5.1.3.1]	ko00030,ko00040,ko00710	Pentose phosphate pathway|Pentose and glucuronate interconversions|Carbon fixation in photosynthetic organisms	STM3483	COG0036	Pentose-5-phosphate-3-epimerase	[G]
PHG bin.6
gene0404 348088 348765 k141_2700_length_30426_cov_27.1098_4 3161 3838	WP_004126039.1	MULTISPECIES: ribulose-phosphate 3-epimerase [Klebsiella]	P0AG09.1	RecName: Full=Ribulose-phosphate 3-epimerase; AltName: Full=Pentose-5-phosphate 3-epimerase; Short=PPE; AltName: Full=R5P3E	Molecular Function: ribulose-phosphate 3-epimerase activity (GO:0004750);|Biological Process: carbohydrate metabolic process (GO:0005975);|Biological Process: pentose-phosphate shunt (GO:0006098);|Molecular Function: metal ion binding (GO:0046872);	kok:KONIH1_27110	K01783	rpe, RPE	ribulose-phosphate 3-epimerase [EC:5.1.3.1]	ko00030,ko00040,ko00710	Pentose phosphate pathway|Pentose and glucuronate interconversions|Carbon fixation in photosynthetic organisms	Zrpe	COG0036	Pentose-5-phosphate-3-epimerase	[G]
PHG bin.9
gene3088 3390083 3389430 k141_574842_length_4490_cov_45.7494_4 3222 2569	WP_156234028.1	ribulose-phosphate 3-epimerase [Enterococcus gallinarum]	O34557.1	RecName: Full=Ribulose-phosphate 3-epimerase; AltName: Full=Pentose-5-phosphate 3-epimerase; Short=PPE; AltName: Full=R5P3E	Molecular Function: ribulose-phosphate 3-epimerase activity (GO:0004750);|Cellular Component: cytosol (GO:0005829);|Biological Process: pentose-phosphate shunt, non-oxidative branch (GO:0009052);|Biological Process: pentose catabolic process (GO:0019323);|Biological Process: cellular carbohydrate metabolic process (GO:0044262);|Molecular Function: metal ion binding (GO:0046872);	ega:AL523_04840	K01783	rpe, RPE	ribulose-phosphate 3-epimerase [EC:5.1.3.1]	ko00030,ko00040,ko00710	Pentose phosphate pathway|Pentose and glucuronate interconversions|Carbon fixation in photosynthetic organisms	lin1932	COG0036	Pentose-5-phosphate-3-epimerase	[G]
AHG_bin.1
gene0739 797530 796670 k141_493839_length_64794_cov_55.0123_30 31608 30748	WP_047663584.1	MULTISPECIES: L-ribulose-5-phosphate 3-epimerase [Enterobacteriaceae]	P37679.2	RecName: Full=Putative L-ribulose-5-phosphate 3-epimerase SgbU; AltName: Full=L-xylulose-5-phosphate 3-epimerase	Molecular Function: DNA binding (GO:0003677);|Biological Process: DNA repair (GO:0006281);|Molecular Function: zinc ion binding (GO:0008270);|Molecular Function: intramolecular oxidoreductase activity, interconverting aldoses and ketoses (GO:0016861);|Biological Process: L-lyxose metabolic process (GO:0019324);|Molecular Function: L-ribulose-5-phosphate 3-epimerase activity (GO:0034015);	ron:TE10_01375	K03079	ulaE, sgaU, sgbU	L-ribulose-5-phosphate 3-epimerase [EC:5.1.3.22]	ko00040,ko00053	Pentose and glucuronate interconversions|Ascorbate and aldarate metabolism	STM3676	COG3623	Putative L-xylulose-5-phosphate 3-epimerase	[G]
AHG bin.4
gene1607 1745308 1746180 k141_386611_length_10254_cov_50.0500_10 6578 7450	WP_095846692.1	L-ribulose-5-phosphate 3-epimerase [Gibbsiella quercinecans]	Q8XDI5.1	RecName: Full=L-ribulose-5-phosphate 3-epimerase UlaE; AltName: Full=L-ascorbate utilization protein E; AltName: Full=L-xylulose-5-phosphate 3-epimerase	Molecular Function: intramolecular oxidoreductase activity, interconverting aldoses and ketoses (GO:0016861);|Biological Process: L-ascorbic acid catabolic process (GO:0019854);|Molecular Function: L-ribulose-5-phosphate 3-epimerase activity (GO:0034015);	sers:SERRSCBI_22210	K03079	ulaE, sgaU, sgbU	L-ribulose-5-phosphate 3-epimerase [EC:5.1.3.22]	ko00040,ko00053	Pentose and glucuronate interconversions|Ascorbate and aldarate metabolism	ECs5173	COG3623	Putative L-xylulose-5-phosphate 3-epimerase	[G]
AHG bin.5
gene2026 2156664 2155804 k141_274813_length_8442_cov_15.0000_8 6669 5809	WP_010756664.1	L-ribulose-5-phosphate 3-epimerase [Enterococcus pallens]	P37679.2	RecName: Full=Putative L-ribulose-5-phosphate 3-epimerase SgbU; AltName: Full=L-xylulose-5-phosphate 3-epimerase	Molecular Function: DNA binding (GO:0003677);|Biological Process: DNA repair (GO:0006281);|Molecular Function: zinc ion binding (GO:0008270);|Molecular Function: intramolecular oxidoreductase activity, interconverting aldoses and ketoses (GO:0016861);|Biological Process: L-lyxose metabolic process (GO:0019324);|Molecular Function: L-ribulose-5-phosphate 3-epimerase activity (GO:0034015);	efu:HMPREF0351_11027	K03079	ulaE, sgaU, sgbU	L-ribulose-5-phosphate 3-epimerase [EC:5.1.3.22]	ko00040,ko00053	Pentose and glucuronate interconversions|Ascorbate and aldarate metabolism	STM3676	COG3623	Putative L-xylulose-5-phosphate 3-epimerase	[G]
gene1796 1919099 1919959 k141_111701_length_19578_cov_65.9676_17 17574 18434	WP_047663584.1	MULTISPECIES: L-ribulose-5-phosphate 3-epimerase [Enterobacteriaceae]	P37679.2	RecName: Full=Putative L-ribulose-5-phosphate 3-epimerase SgbU; AltName: Full=L-xylulose-5-phosphate 3-epimerase	Molecular Function: DNA binding (GO:0003677);|Biological Process: DNA repair (GO:0006281);|Molecular Function: zinc ion binding (GO:0008270);|Molecular Function: intramolecular oxidoreductase activity, interconverting aldoses and ketoses (GO:0016861);|Biological Process: L-lyxose metabolic process (GO:0019324);|Molecular Function: L-ribulose-5-phosphate 3-epimerase activity (GO:0034015);	ron:TE10_01375	K03079	ulaE, sgaU, sgbU	L-ribulose-5-phosphate 3-epimerase [EC:5.1.3.22]	ko00040,ko00053	Pentose and glucuronate interconversions|Ascorbate and aldarate metabolism	STM3676	COG3623	Putative L-xylulose-5-phosphate 3-epimerase	[G]
MG bin.1
gene3874 3867650 3868486 k141_8056_length_7782_cov_12.0000 1 837	WP_047663584.1	MULTISPECIES: L-ribulose-5-phosphate 3-epimerase [Enterobacteriaceae]	P37679.2	RecName: Full=Putative L-ribulose-5-phosphate 3-epimerase SgbU; AltName: Full=L-xylulose-5-phosphate 3-epimerase	Molecular Function: DNA binding (GO:0003677);|Biological Process: DNA repair (GO:0006281);|Molecular Function: zinc ion binding (GO:0008270);|Molecular Function: intramolecular oxidoreductase activity, interconverting aldoses and ketoses (GO:0016861);|Biological Process: L-lyxose metabolic process (GO:0019324);|Molecular Function: L-ribulose-5-phosphate 3-epimerase activity (GO:0034015);	ron:TE10_01375	K03079	ulaE, sgaU, sgbU	L-ribulose-5-phosphate 3-epimerase [EC:5.1.3.22]	ko00040,ko00053	Pentose and glucuronate interconversions|Ascorbate and aldarate metabolism	sgbU	COG3623	Putative L-xylulose-5-phosphate 3-epimerase	[G]
PHG bin.3
gene1310 1401033 1400170 k141_277851_length_13317_cov_13.0000_3 2836 1973	WP_109912666.1	MULTISPECIES: L-ribulose-5-phosphate 3-epimerase [Providencia]	P37679.2	RecName: Full=Putative L-ribulose-5-phosphate 3-epimerase SgbU; AltName: Full=L-xylulose-5-phosphate 3-epimerase	Molecular Function: DNA binding (GO:0003677);|Biological Process: DNA repair (GO:0006281);|Molecular Function: zinc ion binding (GO:0008270);|Molecular Function: intramolecular oxidoreductase activity, interconverting aldoses and ketoses (GO:0016861);|Biological Process: L-lyxose metabolic process (GO:0019324);|Molecular Function: L-ribulose-5-phosphate 3-epimerase activity (GO:0034015);	cama:F384_21795	K03079	ulaE, sgaU, sgbU	L-ribulose-5-phosphate 3-epimerase [EC:5.1.3.22]	ko00040,ko00053	Pentose and glucuronate interconversions|Ascorbate and aldarate metabolism	YPO3333	COG3623	Putative L-xylulose-5-phosphate 3-epimerase	[G]
PHG bin.4
gene2609 2646054 2645194 k141_321559_length_6400_cov_74.5507_3 2522 1662	WP_047663584.1	MULTISPECIES: L-ribulose-5-phosphate 3-epimerase [Enterobacteriaceae]	P37679.2	RecName: Full=Putative L-ribulose-5-phosphate 3-epimerase SgbU; AltName: Full=L-xylulose-5-phosphate 3-epimerase	Molecular Function: DNA binding (GO:0003677);|Biological Process: DNA repair (GO:0006281);|Molecular Function: zinc ion binding (GO:0008270);|Molecular Function: intramolecular oxidoreductase activity, interconverting aldoses and ketoses (GO:0016861);|Biological Process: L-lyxose metabolic process (GO:0019324);|Molecular Function: L-ribulose-5-phosphate 3-epimerase activity (GO:0034015);	ron:TE10_01375	K03079	ulaE, sgaU, sgbU	L-ribulose-5-phosphate 3-epimerase [EC:5.1.3.22]	ko00040,ko00053	Pentose and glucuronate interconversions|Ascorbate and aldarate metabolism	STM3676	COG3623	Putative L-xylulose-5-phosphate 3-epimerase	[G]
PHG bin.6
gene2867 2617323 2618183 k141_365089_length_6685_cov_22.0000_2 703 1563	WP_001244040.1	MULTISPECIES: L-ribulose-5-phosphate 3-epimerase [Enterobacteriaceae]	P37679.2	RecName: Full=Putative L-ribulose-5-phosphate 3-epimerase SgbU; AltName: Full=L-xylulose-5-phosphate 3-epimerase	Molecular Function: DNA binding (GO:0003677);|Biological Process: DNA repair (GO:0006281);|Molecular Function: zinc ion binding (GO:0008270);|Molecular Function: intramolecular oxidoreductase activity, interconverting aldoses and ketoses (GO:0016861);|Biological Process: L-lyxose metabolic process (GO:0019324);|Molecular Function: L-ribulose-5-phosphate 3-epimerase activity (GO:0034015);	senb:BN855_37640	K03079	ulaE, sgaU, sgbU	L-ribulose-5-phosphate 3-epimerase [EC:5.1.3.22]	ko00040,ko00053	Pentose and glucuronate interconversions|Ascorbate and aldarate metabolism	STM3676	COG3623	Putative L-xylulose-5-phosphate 3-epimerase	[G]
PHG bin.9
gene2288 2537267 2536407 k141_607279_length_14164_cov_79.1518_4 1859 999	WP_010756664.1	L-ribulose-5-phosphate 3-epimerase [Enterococcus pallens]	P37679.2	RecName: Full=Putative L-ribulose-5-phosphate 3-epimerase SgbU; AltName: Full=L-xylulose-5-phosphate 3-epimerase	Molecular Function: DNA binding (GO:0003677);|Biological Process: DNA repair (GO:0006281);|Molecular Function: zinc ion binding (GO:0008270);|Molecular Function: intramolecular oxidoreductase activity, interconverting aldoses and ketoses (GO:0016861);|Biological Process: L-lyxose metabolic process (GO:0019324);|Molecular Function: L-ribulose-5-phosphate 3-epimerase activity (GO:0034015);	efu:HMPREF0351_11027	K03079	ulaE, sgaU, sgbU	L-ribulose-5-phosphate 3-epimerase [EC:5.1.3.22]	ko00040,ko00053	Pentose and glucuronate interconversions|Ascorbate and aldarate metabolism	STM3676	COG3623	Putative L-xylulose-5-phosphate 3-epimerase	[G]
Pyruvate kinase
AHG_bin.1
gene3351 3604601 3603159 k141_17748_length_22827_cov_47.0701_14 14679 13237	WP_095101692.1	MULTISPECIES: pyruvate kinase [Enterobacteriaceae]	Q8ZNW0.3	RecName: Full=Pyruvate kinase II; AltName: Full=PK-2	Molecular Function: magnesium ion binding (GO:0000287);|Molecular Function: pyruvate kinase activity (GO:0004743);|Molecular Function: ATP binding (GO:0005524);|Cellular Component: cytosol (GO:0005829);|Biological Process: glycolytic process (GO:0006096);|Molecular Function: kinase activity (GO:0016301);|Molecular Function: potassium ion binding (GO:0030955);	ron:TE10_18360	K00873	PK, pyk	pyruvate kinase [EC:2.7.1.40]	ko00010,ko00230,ko00620,ko04922,ko04930,ko05165,ko05203,ko05230	Glycolysis / Gluconeogenesis|Purine metabolism|Pyruvate metabolism|Glucagon signaling pathway|Type II diabetes mellitus|Human papillomavirus infection|Viral carcinogenesis|Central carbon metabolism in cancer	STM1888	COG0469	Pyruvate kinase	[G]
gene3506 3762324 3763736 k141_519419_length_21559_cov_40.5033_18 17541 18953	WP_095102096.1	MULTISPECIES: pyruvate kinase PykF [Enterobacteriaceae]	P0AD62.1	RecName: Full=Pyruvate kinase I; AltName: Full=PK-1	Molecular Function: magnesium ion binding (GO:0000287);|Molecular Function: pyruvate kinase activity (GO:0004743);|Molecular Function: ATP binding (GO:0005524);|Molecular Function: kinase activity (GO:0016301);|Molecular Function: potassium ion binding (GO:0030955);	ron:TE10_17205	K00873	PK, pyk	pyruvate kinase [EC:2.7.1.40]	ko00010,ko00230,ko00620,ko04922,ko04930,ko05165,ko05203,ko05230	Glycolysis / Gluconeogenesis|Purine metabolism|Pyruvate metabolism|Glucagon signaling pathway|Type II diabetes mellitus|Human papillomavirus infection|Viral carcinogenesis|Central carbon metabolism in cancer	ECs2383	COG0469	Pyruvate kinase	[G]
AHG bin.4
gene3473 3603202 3604644 k141_443932_length_4109_cov_68.0000_3 2180 3622	WP_095844529.1	pyruvate kinase [Gibbsiella quercinecans]	P21599.3	RecName: Full=Pyruvate kinase II; AltName: Full=PK-2	Molecular Function: magnesium ion binding (GO:0000287);|Molecular Function: pyruvate kinase activity (GO:0004743);|Molecular Function: ATP binding (GO:0005524);|Cellular Component: cytosol (GO:0005829);|Molecular Function: kinase activity (GO:0016301);|Molecular Function: potassium ion binding (GO:0030955);|Molecular Function: identical protein binding (GO:0042802);|Biological Process: protein ho…	spe:Spro_2770	K00873	PK, pyk	pyruvate kinase [EC:2.7.1.40]	ko00010,ko00230,ko00620,ko04922,ko04930,ko05165,ko05203,ko05230	Glycolysis / Gluconeogenesis|Purine metabolism|Pyruvate metabolism|Glucagon signaling pathway|Type II diabetes mellitus|Human papillomavirus infection|Viral carcinogenesis|Central carbon metabolism in cancer	YPO2064	COG0469	Pyruvate kinase	[G]
AHG bin.5
gene1518 1633950 1632928 k141_431057_length_10885_cov_13.0000_11 10676 9654	KKR18404.1	Pyruvate kinase [candidate division CPR2 bacterium GW2011_GWC2_39_35]	Q02499.2	RecName: Full=Pyruvate kinase; Short=PK	Molecular Function: magnesium ion binding (GO:0000287);|Molecular Function: pyruvate kinase activity (GO:0004743);|Molecular Function: ATP binding (GO:0005524);|Molecular Function: kinase activity (GO:0016301);|Molecular Function: potassium ion binding (GO:0030955);	abi:Aboo_0946	K00873	PK, pyk	pyruvate kinase [EC:2.7.1.40]	ko00010,ko00230,ko00620,ko04922,ko04930,ko05165,ko05203,ko05230	Glycolysis / Gluconeogenesis|Purine metabolism|Pyruvate metabolism|Glucagon signaling pathway|Type II diabetes mellitus|Human papillomavirus infection|Viral carcinogenesis|Central carbon metabolism in cancer	all2564	COG0469	Pyruvate kinase	[G]
gene3383 3437242 3437847 k141_498891_length_2771_cov_7.0000_3 2165 2770	WP_005472102.1	MULTISPECIES: pyruvate kinase [Enterococcus]	P34038.3	RecName: Full=Pyruvate kinase; Short=PK	Molecular Function: magnesium ion binding (GO:0000287);|Molecular Function: pyruvate kinase activity (GO:0004743);|Molecular Function: ATP binding (GO:0005524);|Molecular Function: kinase activity (GO:0016301);|Molecular Function: potassium ion binding (GO:0030955);	ega:AL523_09920	K00873	PK, pyk	pyruvate kinase [EC:2.7.1.40]	ko00010,ko00230,ko00620,ko04922,ko04930,ko05165,ko05203,ko05230	Glycolysis / Gluconeogenesis|Purine metabolism|Pyruvate metabolism|Glucagon signaling pathway|Type II diabetes mellitus|Human papillomavirus infection|Viral carcinogenesis|Central carbon metabolism in cancer	lin1605_1	COG0469	Pyruvate kinase	[G]
gene3479 3521135 3519939 k141_12957_length_2419_cov_8.0000_3 2419 1223	WP_134874629.1	pyruvate kinase [Enterococcus sp. HSIEG1]	P34038.3	RecName: Full=Pyruvate kinase; Short=PK	Molecular Function: magnesium ion binding (GO:0000287);|Molecular Function: pyruvate kinase activity (GO:0004743);|Molecular Function: ATP binding (GO:0005524);|Molecular Function: kinase activity (GO:0016301);|Molecular Function: potassium ion binding (GO:0030955);	ecas:ECBG_02946	K00873	PK, pyk	pyruvate kinase [EC:2.7.1.40]	ko00010,ko00230,ko00620,ko04922,ko04930,ko05165,ko05203,ko05230	Glycolysis / Gluconeogenesis|Purine metabolism|Pyruvate metabolism|Glucagon signaling pathway|Type II diabetes mellitus|Human papillomavirus infection|Viral carcinogenesis|Central carbon metabolism in cancer	lin1605_1	COG0469	Pyruvate kinase	[G]
FG bin.1
gene0403 428134 426722 k141_151144_length_37070_cov_62.1108_5 4151 2739	WP_095102096.1	MULTISPECIES: pyruvate kinase PykF [Enterobacteriaceae]	P0AD62.1	RecName: Full=Pyruvate kinase I; AltName: Full=PK-1	Molecular Function: magnesium ion binding (GO:0000287);|Molecular Function: pyruvate kinase activity (GO:0004743);|Molecular Function: ATP binding (GO:0005524);|Molecular Function: kinase activity (GO:0016301);|Molecular Function: potassium ion binding (GO:0030955);	ron:TE10_17205	K00873	PK, pyk	pyruvate kinase [EC:2.7.1.40]	ko00010,ko00230,ko00620,ko04922,ko04930,ko05165,ko05203,ko05230	Glycolysis / Gluconeogenesis|Purine metabolism|Pyruvate metabolism|Glucagon signaling pathway|Type II diabetes mellitus|Human papillomavirus infection|Viral carcinogenesis|Central carbon metabolism in cancer	ECs2383	COG0469	Pyruvate kinase	[G]
gene1414 1511252 1509810 k141_355995_length_22282_cov_65.4744_13 14181 12739	WP_095101692.1	MULTISPECIES: pyruvate kinase [Enterobacteriaceae]	Q8ZNW0.3	RecName: Full=Pyruvate kinase II; AltName: Full=PK-2	Molecular Function: magnesium ion binding (GO:0000287);|Molecular Function: pyruvate kinase activity (GO:0004743);|Molecular Function: ATP binding (GO:0005524);|Cellular Component: cytosol (GO:0005829);|Biological Process: glycolytic process (GO:0006096);|Molecular Function: kinase activity (GO:0016301);|Molecular Function: potassium ion binding (GO:0030955);	ron:TE10_18360	K00873	PK, pyk	pyruvate kinase [EC:2.7.1.40]	ko00010,ko00230,ko00620,ko04922,ko04930,ko05165,ko05203,ko05230	Glycolysis / Gluconeogenesis|Purine metabolism|Pyruvate metabolism|Glucagon signaling pathway|Type II diabetes mellitus|Human papillomavirus infection|Viral carcinogenesis|Central carbon metabolism in cancer	STM1888	COG0469	Pyruvate kinase	[G]
FG bin.2
gene0722 794631 795923 k141_233576_length_148931_cov_18.0015_40 34826 36118	KMV65427.1	pyruvate kinase [Encephalitozoon cuniculi EcunIII-L]	Q8SQP0.2	RecName: Full=Pyruvate kinase; Short=PK	Molecular Function: magnesium ion binding (GO:0000287);|Molecular Function: pyruvate kinase activity (GO:0004743);|Molecular Function: ATP binding (GO:0005524);|Molecular Function: kinase activity (GO:0016301);|Molecular Function: potassium ion binding (GO:0030955);	ecu:ECU09_0640	K00873	PK, pyk	pyruvate kinase [EC:2.7.1.40]	ko00010,ko00230,ko00620,ko04922,ko04930,ko05165,ko05203,ko05230	Glycolysis / Gluconeogenesis|Purine metabolism|Pyruvate metabolism|Glucagon signaling pathway|Type II diabetes mellitus|Human papillomavirus infection|Viral carcinogenesis|Central carbon metabolism in cancer	ECU09g0640	COG0469	Pyruvate kinase	[G]
MG bin.1
gene3861 3854933 3856375 k141_39443_length_7794_cov_10.0000_3 2870 4312	WP_095101692.1	MULTISPECIES: pyruvate kinase [Enterobacteriaceae]	Q8ZNW0.3	RecName: Full=Pyruvate kinase II; AltName: Full=PK-2	Molecular Function: magnesium ion binding (GO:0000287);|Molecular Function: pyruvate kinase activity (GO:0004743);|Molecular Function: ATP binding (GO:0005524);|Cellular Component: cytosol (GO:0005829);|Biological Process: glycolytic process (GO:0006096);|Molecular Function: kinase activity (GO:0016301);|Molecular Function: potassium ion binding (GO:0030955);	ron:TE10_18360	K00873	PK, pyk	pyruvate kinase [EC:2.7.1.40]	ko00010,ko00230,ko00620,ko04922,ko04930,ko05165,ko05203,ko05230	Glycolysis / Gluconeogenesis|Purine metabolism|Pyruvate metabolism|Glucagon signaling pathway|Type II diabetes mellitus|Human papillomavirus infection|Viral carcinogenesis|Central carbon metabolism in cancer	STM1888	COG0469	Pyruvate kinase	[G]
gene4219 4202700 4201288 k141_350610_length_6907_cov_10.0000_7 5124 3712	WP_095102096.1	MULTISPECIES: pyruvate kinase PykF [Enterobacteriaceae]	P0AD62.1	RecName: Full=Pyruvate kinase I; AltName: Full=PK-1	Molecular Function: magnesium ion binding (GO:0000287);|Molecular Function: pyruvate kinase activity (GO:0004743);|Molecular Function: ATP binding (GO:0005524);|Molecular Function: kinase activity (GO:0016301);|Molecular Function: potassium ion binding (GO:0030955);	ron:TE10_17205	K00873	PK, pyk	pyruvate kinase [EC:2.7.1.40]	ko00010,ko00230,ko00620,ko04922,ko04930,ko05165,ko05203,ko05230	Glycolysis / Gluconeogenesis|Purine metabolism|Pyruvate metabolism|Glucagon signaling pathway|Type II diabetes mellitus|Human papillomavirus infection|Viral carcinogenesis|Central carbon metabolism in cancer	ECs2383	COG0469	Pyruvate kinase	[G]
PHG bin.2
gene2435 2801236 2802702 k141_279813_length_182023_cov_27.0292_43 39338 40804	WP_165023719.1	MULTISPECIES: pyruvate kinase [unclassified Dysgonomonas]	O51323.1	RecName: Full=Pyruvate kinase; Short=PK	Molecular Function: magnesium ion binding (GO:0000287);|Molecular Function: pyruvate kinase activity (GO:0004743);|Molecular Function: ATP binding (GO:0005524);|Cellular Component: cytosol (GO:0005829);|Molecular Function: kinase activity (GO:0016301);|Molecular Function: potassium ion binding (GO:0030955);	pdi:BDI_3302	K00873	PK, pyk	pyruvate kinase [EC:2.7.1.40]	ko00010,ko00230,ko00620,ko04922,ko04930,ko05165,ko05203,ko05230	Glycolysis / Gluconeogenesis|Purine metabolism|Pyruvate metabolism|Glucagon signaling pathway|Type II diabetes mellitus|Human papillomavirus infection|Viral carcinogenesis|Central carbon metabolism in cancer	BB0348	COG0469	Pyruvate kinase	[G]
PHG bin.3
gene2271 2406815 2408227 k141_234833_length_9167_cov_20.0000_5 4401 5813	WP_004910422.1	MULTISPECIES: pyruvate kinase PykF [Providencia]	P77983.2	RecName: Full=Pyruvate kinase I; AltName: Full=PK-1	Molecular Function: magnesium ion binding (GO:0000287);|Molecular Function: pyruvate kinase activity (GO:0004743);|Molecular Function: ATP binding (GO:0005524);|Cellular Component: cytosol (GO:0005829);|Biological Process: glycolytic process (GO:0006096);|Molecular Function: kinase activity (GO:0016301);|Molecular Function: potassium ion binding (GO:0030955);	psx:DR96_2815	K00873	PK, pyk	pyruvate kinase [EC:2.7.1.40]	ko00010,ko00230,ko00620,ko04922,ko04930,ko05165,ko05203,ko05230	Glycolysis / Gluconeogenesis|Purine metabolism|Pyruvate metabolism|Glucagon signaling pathway|Type II diabetes mellitus|Human papillomavirus infection|Viral carcinogenesis|Central carbon metabolism in cancer	STM1378	COG0469	Pyruvate kinase	[G]
gene2341 2465798 2464611 k141_675763_length_8954_cov_7.0000_8 8953 7766	WP_109913282.1	MULTISPECIES: pyruvate kinase [Providencia]	P21599.3	RecName: Full=Pyruvate kinase II; AltName: Full=PK-2	Molecular Function: magnesium ion binding (GO:0000287);|Molecular Function: pyruvate kinase activity (GO:0004743);|Molecular Function: ATP binding (GO:0005524);|Cellular Component: cytosol (GO:0005829);|Molecular Function: kinase activity (GO:0016301);|Molecular Function: potassium ion binding (GO:0030955);|Molecular Function: identical protein binding (GO:0042802);|Biological Process: protein ho…	psi:S70_20325	K00873	PK, pyk	pyruvate kinase [EC:2.7.1.40]	ko00010,ko00230,ko00620,ko04922,ko04930,ko05165,ko05203,ko05230	Glycolysis / Gluconeogenesis|Purine metabolism|Pyruvate metabolism|Glucagon signaling pathway|Type II diabetes mellitus|Human papillomavirus infection|Viral carcinogenesis|Central carbon metabolism in cancer	YPO2064	COG0469	Pyruvate kinase	[G]
PHG bin.4
gene0744 752275 753717 k141_631146_length_14909_cov_78.4546_8 7868 9310	WP_095101692.1	MULTISPECIES: pyruvate kinase [Enterobacteriaceae]	Q8ZNW0.3	RecName: Full=Pyruvate kinase II; AltName: Full=PK-2	Molecular Function: magnesium ion binding (GO:0000287);|Molecular Function: pyruvate kinase activity (GO:0004743);|Molecular Function: ATP binding (GO:0005524);|Cellular Component: cytosol (GO:0005829);|Biological Process: glycolytic process (GO:0006096);|Molecular Function: kinase activity (GO:0016301);|Molecular Function: potassium ion binding (GO:0030955);	ron:TE10_18360	K00873	PK, pyk	pyruvate kinase [EC:2.7.1.40]	ko00010,ko00230,ko00620,ko04922,ko04930,ko05165,ko05203,ko05230	Glycolysis / Gluconeogenesis|Purine metabolism|Pyruvate metabolism|Glucagon signaling pathway|Type II diabetes mellitus|Human papillomavirus infection|Viral carcinogenesis|Central carbon metabolism in cancer	STM1888	COG0469	Pyruvate kinase	[G]
gene1610 1649201 1647789 k141_805763_length_9930_cov_121.5411_5 3744 2332	WP_095102096.1	MULTISPECIES: pyruvate kinase PykF [Enterobacteriaceae]	P0AD62.1	RecName: Full=Pyruvate kinase I; AltName: Full=PK-1	Molecular Function: magnesium ion binding (GO:0000287);|Molecular Function: pyruvate kinase activity (GO:0004743);|Molecular Function: ATP binding (GO:0005524);|Molecular Function: kinase activity (GO:0016301);|Molecular Function: potassium ion binding (GO:0030955);	ron:TE10_17205	K00873	PK, pyk	pyruvate kinase [EC:2.7.1.40]	ko00010,ko00230,ko00620,ko04922,ko04930,ko05165,ko05203,ko05230	Glycolysis / Gluconeogenesis|Purine metabolism|Pyruvate metabolism|Glucagon signaling pathway|Type II diabetes mellitus|Human papillomavirus infection|Viral carcinogenesis|Central carbon metabolism in cancer	ECs2383	COG0469	Pyruvate kinase	[G]
PHG bin.6
gene3100 2862085 2862675 k141_599431_length_6296_cov_19.0000_7 5704 6294	WP_154988230.1	pyruvate kinase PykF [Klebsiella oxytoca]	P77983.2	RecName: Full=Pyruvate kinase I; AltName: Full=PK-1	Molecular Function: magnesium ion binding (GO:0000287);|Molecular Function: pyruvate kinase activity (GO:0004743);|Molecular Function: ATP binding (GO:0005524);|Cellular Component: cytosol (GO:0005829);|Biological Process: glycolytic process (GO:0006096);|Molecular Function: kinase activity (GO:0016301);|Molecular Function: potassium ion binding (GO:0030955);	ses:SARI_01602	K00873	PK, pyk	pyruvate kinase [EC:2.7.1.40]	ko00010,ko00230,ko00620,ko04922,ko04930,ko05165,ko05203,ko05230	Glycolysis / Gluconeogenesis|Purine metabolism|Pyruvate metabolism|Glucagon signaling pathway|Type II diabetes mellitus|Human papillomavirus infection|Viral carcinogenesis|Central carbon metabolism in cancer	STM1378	COG0469	Pyruvate kinase	[G]
gene2303 2122385 2120943 k141_695898_length_8059_cov_18.0000_6 7859 6417	WP_138361484.1	MULTISPECIES: pyruvate kinase [unclassified Klebsiella]	Q8ZNW0.3	RecName: Full=Pyruvate kinase II; AltName: Full=PK-2	Molecular Function: magnesium ion binding (GO:0000287);|Molecular Function: pyruvate kinase activity (GO:0004743);|Molecular Function: ATP binding (GO:0005524);|Cellular Component: cytosol (GO:0005829);|Biological Process: glycolytic process (GO:0006096);|Molecular Function: kinase activity (GO:0016301);|Molecular Function: potassium ion binding (GO:0030955);	koe:A225_3666	K00873	PK, pyk	pyruvate kinase [EC:2.7.1.40]	ko00010,ko00230,ko00620,ko04922,ko04930,ko05165,ko05203,ko05230	Glycolysis / Gluconeogenesis|Purine metabolism|Pyruvate metabolism|Glucagon signaling pathway|Type II diabetes mellitus|Human papillomavirus infection|Viral carcinogenesis|Central carbon metabolism in cancer	STM1888	COG0469	Pyruvate kinase	[G]
PHG bin.9
gene1664 1869367 1871151 k141_383740_length_25324_cov_54.8646_13 17572 19356	WP_005472102.1	MULTISPECIES: pyruvate kinase [Enterococcus]	P34038.3	RecName: Full=Pyruvate kinase; Short=PK	Molecular Function: magnesium ion binding (GO:0000287);|Molecular Function: pyruvate kinase activity (GO:0004743);|Molecular Function: ATP binding (GO:0005524);|Molecular Function: kinase activity (GO:0016301);|Molecular Function: potassium ion binding (GO:0030955);	ecas:ECBG_02946	K00873	PK, pyk	pyruvate kinase [EC:2.7.1.40]	ko00010,ko00230,ko00620,ko04922,ko04930,ko05165,ko05203,ko05230	Glycolysis / Gluconeogenesis|Purine metabolism|Pyruvate metabolism|Glucagon signaling pathway|Type II diabetes mellitus|Human papillomavirus infection|Viral carcinogenesis|Central carbon metabolism in cancer	lin1605_1	COG0469	Pyruvate kinase	[G]
gene2485 2750644 2751666 k141_78804_length_12563_cov_53.5182_3 3126 4148	CCY62017.1	pyruvate kinase [Clostridium sp. CAG:967]	Q02499.2	RecName: Full=Pyruvate kinase; Short=PK	Molecular Function: magnesium ion binding (GO:0000287);|Molecular Function: pyruvate kinase activity (GO:0004743);|Molecular Function: ATP binding (GO:0005524);|Molecular Function: kinase activity (GO:0016301);|Molecular Function: potassium ion binding (GO:0030955);	abi:Aboo_0946	K00873	PK, pyk	pyruvate kinase [EC:2.7.1.40]	ko00010,ko00230,ko00620,ko04922,ko04930,ko05165,ko05203,ko05230	Glycolysis / Gluconeogenesis|Purine metabolism|Pyruvate metabolism|Glucagon signaling pathway|Type II diabetes mellitus|Human papillomavirus infection|Viral carcinogenesis|Central carbon metabolism in cancer	all2564	COG0469	Pyruvate kinase	[G]
AHG bin.5
gene2118 2246564 2243922 k141_425629_length_8153_cov_9.0242_4 4761 2119	WP_165716864.1	pyruvate, phosphate dikinase [Lactococcus petauri]	P22983.5	RecName: Full=Pyruvate, phosphate dikinase; AltName: Full=Pyruvate, orthophosphate dikinase	Molecular Function: ATP binding (GO:0005524);|Biological Process: pyruvate metabolic process (GO:0006090);|Molecular Function: kinase activity (GO:0016301);|Molecular Function: metal ion binding (GO:0046872);|Molecular Function: pyruvate, phosphate dikinase activity (GO:0050242);	lgr:LCGT_1058	K01006	ppdK	pyruvate, orthophosphate dikinase [EC:2.7.9.1]	ko00620,ko00710,ko00720	Pyruvate metabolism|Carbon fixation in photosynthetic organisms|Carbon fixation pathways in prokaryotes	lin1981	COG0574	Phosphoenolpyruvate synthase/pyruvate phosphate dikinase	[G]
PHG bin.9
gene2896 3194930 3192288 k141_392380_length_7484_cov_102.8374_2 2860 218	WP_165716864.1	pyruvate, phosphate dikinase [Lactococcus petauri]	P22983.5	RecName: Full=Pyruvate, phosphate dikinase; AltName: Full=Pyruvate, orthophosphate dikinase	Molecular Function: ATP binding (GO:0005524);|Biological Process: pyruvate metabolic process (GO:0006090);|Molecular Function: kinase activity (GO:0016301);|Molecular Function: metal ion binding (GO:0046872);|Molecular Function: pyruvate, phosphate dikinase activity (GO:0050242);	lgv:LCGL_0982	K01006	ppdK	pyruvate, orthophosphate dikinase [EC:2.7.9.1]	ko00620,ko00710,ko00720	Pyruvate metabolism|Carbon fixation in photosynthetic organisms|Carbon fixation pathways in prokaryotes	lin1981	COG0574	Phosphoenolpyruvate synthase/pyruvate phosphate dikinase	[G]
AHG_bin.1
gene4291 4607153 4609531 k141_172485_length_13917_cov_40.5823_5 4607 6985	WP_095102062.1	MULTISPECIES: phosphoenolpyruvate synthase [Enterobacteriaceae]	P23538.5	RecName: Full=Phosphoenolpyruvate synthase; Short=PEP synthase; AltName: Full=Pyruvate, water dikinase	Molecular Function: magnesium ion binding (GO:0000287);|Molecular Function: ATP binding (GO:0005524);|Cellular Component: cytosol (GO:0005829);|Biological Process: pyruvate metabolic process (GO:0006090);|Biological Process: gluconeogenesis (GO:0006094);|Molecular Function: pyruvate, water dikinase activity (GO:0008986);	ron:TE10_17290	K01007	pps, ppsA	pyruvate, water dikinase [EC:2.7.9.2]	ko00620,ko00680,ko00720	Pyruvate metabolism|Methane metabolism|Carbon fixation pathways in prokaryotes	ppsA	COG0574	Phosphoenolpyruvate synthase/pyruvate phosphate dikinase	[G]
FG bin.1
gene0171 193377 190999 k141_191277_length_42029_cov_62.7832_3 6624 4246	WP_095102062.1	MULTISPECIES: phosphoenolpyruvate synthase [Enterobacteriaceae]	P23538.5	RecName: Full=Phosphoenolpyruvate synthase; Short=PEP synthase; AltName: Full=Pyruvate, water dikinase	Molecular Function: magnesium ion binding (GO:0000287);|Molecular Function: ATP binding (GO:0005524);|Cellular Component: cytosol (GO:0005829);|Biological Process: pyruvate metabolic process (GO:0006090);|Biological Process: gluconeogenesis (GO:0006094);|Molecular Function: pyruvate, water dikinase activity (GO:0008986);	ron:TE10_17290	K01007	pps, ppsA	pyruvate, water dikinase [EC:2.7.9.2]	ko00620,ko00680,ko00720	Pyruvate metabolism|Methane metabolism|Carbon fixation pathways in prokaryotes	ppsA	COG0574	Phosphoenolpyruvate synthase/pyruvate phosphate dikinase	[G]
MG bin.1
gene3958 3949491 3947113 k141_78982_length_7582_cov_10.0000_3 5159 2781	WP_095102062.1	MULTISPECIES: phosphoenolpyruvate synthase [Enterobacteriaceae]	P23538.5	RecName: Full=Phosphoenolpyruvate synthase; Short=PEP synthase; AltName: Full=Pyruvate, water dikinase	Molecular Function: magnesium ion binding (GO:0000287);|Molecular Function: ATP binding (GO:0005524);|Cellular Component: cytosol (GO:0005829);|Biological Process: pyruvate metabolic process (GO:0006090);|Biological Process: gluconeogenesis (GO:0006094);|Molecular Function: pyruvate, water dikinase activity (GO:0008986);	ron:TE10_17290	K01007	pps, ppsA	pyruvate, water dikinase [EC:2.7.9.2]	ko00620,ko00680,ko00720	Pyruvate metabolism|Methane metabolism|Carbon fixation pathways in prokaryotes	ppsA	COG0574	Phosphoenolpyruvate synthase/pyruvate phosphate dikinase	[G]
PHG bin.3
gene2749 2895734 2898112 k141_155102_length_7519_cov_10.0000_2 786 3164	WP_109911260.1	MULTISPECIES: phosphoenolpyruvate synthase [Providencia]	P23538.5	RecName: Full=Phosphoenolpyruvate synthase; Short=PEP synthase; AltName: Full=Pyruvate, water dikinase	Molecular Function: magnesium ion binding (GO:0000287);|Molecular Function: ATP binding (GO:0005524);|Cellular Component: cytosol (GO:0005829);|Biological Process: pyruvate metabolic process (GO:0006090);|Biological Process: gluconeogenesis (GO:0006094);|Molecular Function: pyruvate, water dikinase activity (GO:0008986);	psi:S70_19470	K01007	pps, ppsA	pyruvate, water dikinase [EC:2.7.9.2]	ko00620,ko00680,ko00720	Pyruvate metabolism|Methane metabolism|Carbon fixation pathways in prokaryotes	YPO2409	COG0574	Phosphoenolpyruvate synthase/pyruvate phosphate dikinase	[G]
PHG bin.4
gene0938 960715 963093 k141_69439_length_13332_cov_64.4705_8 6761 9139	WP_095102062.1	MULTISPECIES: phosphoenolpyruvate synthase [Enterobacteriaceae]	P23538.5	RecName: Full=Phosphoenolpyruvate synthase; Short=PEP synthase; AltName: Full=Pyruvate, water dikinase	Molecular Function: magnesium ion binding (GO:0000287);|Molecular Function: ATP binding (GO:0005524);|Cellular Component: cytosol (GO:0005829);|Biological Process: pyruvate metabolic process (GO:0006090);|Biological Process: gluconeogenesis (GO:0006094);|Molecular Function: pyruvate, water dikinase activity (GO:0008986);	ron:TE10_17290	K01007	pps, ppsA	pyruvate, water dikinase [EC:2.7.9.2]	ko00620,ko00680,ko00720	Pyruvate metabolism|Methane metabolism|Carbon fixation pathways in prokaryotes	ppsA	COG0574	Phosphoenolpyruvate synthase/pyruvate phosphate dikinase	[G]
AHG_bin.1
gene4290 4606812 4605979 k141_172485_length_13917_cov_40.5823_4 4266 3433	WP_095102292.1	MULTISPECIES: kinase/pyrophosphorylase [Enterobacteriaceae]	B5XQE5.1	RecName: Full=Putative phosphoenolpyruvate synthase regulatory protein; Short=PEP synthase regulatory protein; Short=PSRP; AltName: Full=Pyruvate, water dikinase regulatory protein	Molecular Function: protein serine/threonine kinase activity (GO:0004674);|Molecular Function: ATP binding (GO:0005524);	ron:TE10_17295	K09773	ppsR	[pyruvate, water dikinase]-phosphate phosphotransferase / [pyruvate, water dikinase] kinase [EC:2.7.4.28 2.7.11.33]			STM1348	COG1806	Uncharacterized protein conserved in bacteria	[S]
AHG bin.4
gene3887 3982111 3981290 k141_501934_length_2310_cov_348.5795_2 2256 1435	WP_095848567.1	kinase/pyrophosphorylase [Gibbsiella quercinecans]	A1JPI0.1	RecName: Full=Putative phosphoenolpyruvate synthase regulatory protein; Short=PEP synthase regulatory protein; Short=PSRP; AltName: Full=Pyruvate, water dikinase regulatory protein	Molecular Function: DNA binding (GO:0003677);|Molecular Function: protein serine/threonine kinase activity (GO:0004674);|Molecular Function: ATP binding (GO:0005524);|Biological Process: regulation of transcription, DNA-templated (GO:0006355);	sfo:Z042_24195	K09773	ppsR	[pyruvate, water dikinase]-phosphate phosphotransferase / [pyruvate, water dikinase] kinase [EC:2.7.4.28 2.7.11.33]			YPO2410	COG1806	Uncharacterized protein conserved in bacteria	[S]
AHG bin.5
gene1959 2097477 2098325 k141_378325_length_8834_cov_11.0000_9 7708 8556	WP_124018802.1	kinase/pyrophosphorylase [Enterococcus gallinarum]	Q831T1.1	RecName: Full=Putative pyruvate, phosphate dikinase regulatory protein 2; Short=PPDK regulatory protein 2	Molecular Function: protein serine/threonine kinase activity (GO:0004674);|Molecular Function: ATP binding (GO:0005524);	ecas:ECBG_00708	K09773	ppsR	[pyruvate, water dikinase]-phosphate phosphotransferase / [pyruvate, water dikinase] kinase [EC:2.7.4.28 2.7.11.33]			lin1980	COG1806	Uncharacterized protein conserved in bacteria	[S]
gene2120 2247392 2248207 k141_425629_length_8153_cov_9.0242_6 5589 6404	WP_005232818.1	MULTISPECIES: kinase/pyrophosphorylase [Enterococcus]	Q836T1.1	RecName: Full=Putative pyruvate, phosphate dikinase regulatory protein 1; Short=PPDK regulatory protein 1	Molecular Function: protein serine/threonine kinase activity (GO:0004674);|Molecular Function: ATP binding (GO:0005524);	ega:AL523_05510	K09773	ppsR	[pyruvate, water dikinase]-phosphate phosphotransferase / [pyruvate, water dikinase] kinase [EC:2.7.4.28 2.7.11.33]			lin1980	COG1806	Uncharacterized protein conserved in bacteria	[S]
FG bin.1
gene0172 193718 194551 k141_191277_length_42029_cov_62.7832_4 6965 7798	WP_095102292.1	MULTISPECIES: kinase/pyrophosphorylase [Enterobacteriaceae]	B5XQE5.1	RecName: Full=Putative phosphoenolpyruvate synthase regulatory protein; Short=PEP synthase regulatory protein; Short=PSRP; AltName: Full=Pyruvate, water dikinase regulatory protein	Molecular Function: protein serine/threonine kinase activity (GO:0004674);|Molecular Function: ATP binding (GO:0005524);	ron:TE10_17295	K09773	ppsR	[pyruvate, water dikinase]-phosphate phosphotransferase / [pyruvate, water dikinase] kinase [EC:2.7.4.28 2.7.11.33]			STM1348	COG1806	Uncharacterized protein conserved in bacteria	[S]
MG bin.1
gene3959 3949832 3950665 k141_78982_length_7582_cov_10.0000_4 5500 6333	WP_095102292.1	MULTISPECIES: kinase/pyrophosphorylase [Enterobacteriaceae]	B5XQE5.1	RecName: Full=Putative phosphoenolpyruvate synthase regulatory protein; Short=PEP synthase regulatory protein; Short=PSRP; AltName: Full=Pyruvate, water dikinase regulatory protein	Molecular Function: protein serine/threonine kinase activity (GO:0004674);|Molecular Function: ATP binding (GO:0005524);	ron:TE10_17295	K09773	ppsR	[pyruvate, water dikinase]-phosphate phosphotransferase / [pyruvate, water dikinase] kinase [EC:2.7.4.28 2.7.11.33]			STM1348	COG1806	Uncharacterized protein conserved in bacteria	[S]
PHG bin.3
gene0900 945350 944991 k141_209733_length_16383_cov_11.0000_15 16382 16023	WP_112307419.1	kinase/pyrophosphorylase [Providencia rettgeri]	Q7N3T4.1	RecName: Full=Putative phosphoenolpyruvate synthase regulatory protein; Short=PEP synthase regulatory protein; Short=PSRP; AltName: Full=Pyruvate, water dikinase regulatory protein	Molecular Function: DNA binding (GO:0003677);|Molecular Function: protein serine/threonine kinase activity (GO:0004674);|Molecular Function: ATP binding (GO:0005524);|Biological Process: regulation of transcription, DNA-templated (GO:0006355);	psx:DR96_2802	K09773	ppsR	[pyruvate, water dikinase]-phosphate phosphotransferase / [pyruvate, water dikinase] kinase [EC:2.7.4.28 2.7.11.33]			YPO2410	COG1806	Uncharacterized protein conserved in bacteria	[S]
gene2748 2895471 2894950 k141_155102_length_7519_cov_10.0000 523 2	WP_110731880.1	MULTISPECIES: kinase/pyrophosphorylase [Providencia]	Q7N3T4.1	RecName: Full=Putative phosphoenolpyruvate synthase regulatory protein; Short=PEP synthase regulatory protein; Short=PSRP; AltName: Full=Pyruvate, water dikinase regulatory protein	Molecular Function: DNA binding (GO:0003677);|Molecular Function: protein serine/threonine kinase activity (GO:0004674);|Molecular Function: ATP binding (GO:0005524);|Biological Process: regulation of transcription, DNA-templated (GO:0006355);	psx:DR96_2802	K09773	ppsR	[pyruvate, water dikinase]-phosphate phosphotransferase / [pyruvate, water dikinase] kinase [EC:2.7.4.28 2.7.11.33]			STM1348	COG1806	Uncharacterized protein conserved in bacteria	[S]
PHG bin.4
gene0937 960374 959541 k141_69439_length_13332_cov_64.4705_7 6420 5587	WP_095102292.1	MULTISPECIES: kinase/pyrophosphorylase [Enterobacteriaceae]	B5XQE5.1	RecName: Full=Putative phosphoenolpyruvate synthase regulatory protein; Short=PEP synthase regulatory protein; Short=PSRP; AltName: Full=Pyruvate, water dikinase regulatory protein	Molecular Function: protein serine/threonine kinase activity (GO:0004674);|Molecular Function: ATP binding (GO:0005524);	ron:TE10_17295	K09773	ppsR	[pyruvate, water dikinase]-phosphate phosphotransferase / [pyruvate, water dikinase] kinase [EC:2.7.4.28 2.7.11.33]			STM1348	COG1806	Uncharacterized protein conserved in bacteria	[S]
PHG bin.9
gene2189 2442809 2443657 k141_292922_length_15754_cov_51.1726_13 13206 14054	WP_124018802.1	kinase/pyrophosphorylase [Enterococcus gallinarum]	Q831T1.1	RecName: Full=Putative pyruvate, phosphate dikinase regulatory protein 2; Short=PPDK regulatory protein 2	Molecular Function: protein serine/threonine kinase activity (GO:0004674);|Molecular Function: ATP binding (GO:0005524);	ecas:ECBG_00708	K09773	ppsR	[pyruvate, water dikinase]-phosphate phosphotransferase / [pyruvate, water dikinase] kinase [EC:2.7.4.28 2.7.11.33]			lin1980	COG1806	Uncharacterized protein conserved in bacteria	[S]
gene2898 3195758 3196573 k141_392380_length_7484_cov_102.8374_4 3688 4503	WP_005232818.1	MULTISPECIES: kinase/pyrophosphorylase [Enterococcus]	Q836T1.1	RecName: Full=Putative pyruvate, phosphate dikinase regulatory protein 1; Short=PPDK regulatory protein 1	Molecular Function: protein serine/threonine kinase activity (GO:0004674);|Molecular Function: ATP binding (GO:0005524);	ega:AL523_05510	K09773	ppsR	[pyruvate, water dikinase]-phosphate phosphotransferase / [pyruvate, water dikinase] kinase [EC:2.7.4.28 2.7.11.33]			lin1980	COG1806	Uncharacterized protein conserved in bacteria	[S]
AHG_bin.1
gene1656 1803558 1805180 k141_31044_length_45117_cov_60.3120_29 29439 31061	WP_095105293.1	MULTISPECIES: phosphoenolpyruvate carboxykinase (ATP) [Enterobacteriaceae]	Q8Z216.1	RecName: Full=Phosphoenolpyruvate carboxykinase (ATP); Short=PCK; Short=PEP carboxykinase; Short=PEPCK	Molecular Function: phosphoenolpyruvate carboxykinase (ATP) activity (GO:0004612);|Molecular Function: ATP binding (GO:0005524);|Cellular Component: cytoplasm (GO:0005737);|Biological Process: gluconeogenesis (GO:0006094);|Molecular Function: metal ion binding (GO:0046872);	ron:TE10_00465	K01610	E4.1.1.49, pckA	phosphoenolpyruvate carboxykinase (ATP) [EC:4.1.1.49]	ko00010,ko00020,ko00620,ko00710	Glycolysis / Gluconeogenesis|Citrate cycle (TCA cycle)|Pyruvate metabolism|Carbon fixation in photosynthetic organisms	STM3500	COG1866	Phosphoenolpyruvate carboxykinase (ATP)	[C]
gene4261 4575044 4576687 k141_84981_length_14018_cov_37.4943_2 526 2169	WP_095101933.1	MULTISPECIES: phosphoenolpyruvate carboxykinase (ATP) [Enterobacteriaceae]	B2VJU9.1	RecName: Full=Phosphoenolpyruvate carboxykinase (ATP); Short=PCK; Short=PEP carboxykinase; Short=PEPCK	Molecular Function: phosphoenolpyruvate carboxykinase (ATP) activity (GO:0004612);|Molecular Function: ATP binding (GO:0005524);|Cellular Component: cytoplasm (GO:0005737);|Biological Process: gluconeogenesis (GO:0006094);|Molecular Function: metal ion binding (GO:0046872);	ron:TE10_17880	K01610	E4.1.1.49, pckA	phosphoenolpyruvate carboxykinase (ATP) [EC:4.1.1.49]	ko00010,ko00020,ko00620,ko00710	Glycolysis / Gluconeogenesis|Citrate cycle (TCA cycle)|Pyruvate metabolism|Carbon fixation in photosynthetic organisms	pckA	COG1866	Phosphoenolpyruvate carboxykinase (ATP)	[C]
AHG bin.4
gene0225 251940 253559 k141_140300_length_28767_cov_52.4834_14 13470 15089	WP_121554294.1	phosphoenolpyruvate carboxykinase (ATP) [Gibbsiella quercinecans]	Q6CZP5.1	RecName: Full=Phosphoenolpyruvate carboxykinase (ATP); Short=PCK; Short=PEP carboxykinase; Short=PEPCK	Molecular Function: phosphoenolpyruvate carboxykinase (ATP) activity (GO:0004612);|Molecular Function: ATP binding (GO:0005524);|Cellular Component: cytoplasm (GO:0005737);|Biological Process: gluconeogenesis (GO:0006094);|Molecular Function: metal ion binding (GO:0046872);	sfw:WN53_06240	K01610	E4.1.1.49, pckA	phosphoenolpyruvate carboxykinase (ATP) [EC:4.1.1.49]	ko00010,ko00020,ko00620,ko00710	Glycolysis / Gluconeogenesis|Citrate cycle (TCA cycle)|Pyruvate metabolism|Carbon fixation in photosynthetic organisms	YPO0138	COG1866	Phosphoenolpyruvate carboxykinase (ATP)	[C]
FG bin.1
gene0826 885626 883983 k141_18560_length_30779_cov_67.5531_8 9082 7439	WP_095101933.1	MULTISPECIES: phosphoenolpyruvate carboxykinase (ATP) [Enterobacteriaceae]	B2VJU9.1	RecName: Full=Phosphoenolpyruvate carboxykinase (ATP); Short=PCK; Short=PEP carboxykinase; Short=PEPCK	Molecular Function: phosphoenolpyruvate carboxykinase (ATP) activity (GO:0004612);|Molecular Function: ATP binding (GO:0005524);|Cellular Component: cytoplasm (GO:0005737);|Biological Process: gluconeogenesis (GO:0006094);|Molecular Function: metal ion binding (GO:0046872);	ron:TE10_17880	K01610	E4.1.1.49, pckA	phosphoenolpyruvate carboxykinase (ATP) [EC:4.1.1.49]	ko00010,ko00020,ko00620,ko00710	Glycolysis / Gluconeogenesis|Citrate cycle (TCA cycle)|Pyruvate metabolism|Carbon fixation in photosynthetic organisms	pckA	COG1866	Phosphoenolpyruvate carboxykinase (ATP)	[C]
gene3893 4099526 4101148 k141_182226_length_7365_cov_58.7654_2 628 2250	WP_095105293.1	MULTISPECIES: phosphoenolpyruvate carboxykinase (ATP) [Enterobacteriaceae]	Q8Z216.1	RecName: Full=Phosphoenolpyruvate carboxykinase (ATP); Short=PCK; Short=PEP carboxykinase; Short=PEPCK	Molecular Function: phosphoenolpyruvate carboxykinase (ATP) activity (GO:0004612);|Molecular Function: ATP binding (GO:0005524);|Cellular Component: cytoplasm (GO:0005737);|Biological Process: gluconeogenesis (GO:0006094);|Molecular Function: metal ion binding (GO:0046872);	ron:TE10_00465	K01610	E4.1.1.49, pckA	phosphoenolpyruvate carboxykinase (ATP) [EC:4.1.1.49]	ko00010,ko00020,ko00620,ko00710	Glycolysis / Gluconeogenesis|Citrate cycle (TCA cycle)|Pyruvate metabolism|Carbon fixation in photosynthetic organisms	STM3500	COG1866	Phosphoenolpyruvate carboxykinase (ATP)	[C]
MG bin.1
gene0270 298743 297100 k141_335410_length_30209_cov_13.0000_6 7901 6258	WP_095101933.1	MULTISPECIES: phosphoenolpyruvate carboxykinase (ATP) [Enterobacteriaceae]	B2VJU9.1	RecName: Full=Phosphoenolpyruvate carboxykinase (ATP); Short=PCK; Short=PEP carboxykinase; Short=PEPCK	Molecular Function: phosphoenolpyruvate carboxykinase (ATP) activity (GO:0004612);|Molecular Function: ATP binding (GO:0005524);|Cellular Component: cytoplasm (GO:0005737);|Biological Process: gluconeogenesis (GO:0006094);|Molecular Function: metal ion binding (GO:0046872);	ron:TE10_17880	K01610	E4.1.1.49, pckA	phosphoenolpyruvate carboxykinase (ATP) [EC:4.1.1.49]	ko00010,ko00020,ko00620,ko00710	Glycolysis / Gluconeogenesis|Citrate cycle (TCA cycle)|Pyruvate metabolism|Carbon fixation in photosynthetic organisms	pckA	COG1866	Phosphoenolpyruvate carboxykinase (ATP)	[C]
gene5520 5414429 5412807 k141_1983_length_3392_cov_9.0000_2 2768 1146	WP_095105293.1	MULTISPECIES: phosphoenolpyruvate carboxykinase (ATP) [Enterobacteriaceae]	Q8Z216.1	RecName: Full=Phosphoenolpyruvate carboxykinase (ATP); Short=PCK; Short=PEP carboxykinase; Short=PEPCK	Molecular Function: phosphoenolpyruvate carboxykinase (ATP) activity (GO:0004612);|Molecular Function: ATP binding (GO:0005524);|Cellular Component: cytoplasm (GO:0005737);|Biological Process: gluconeogenesis (GO:0006094);|Molecular Function: metal ion binding (GO:0046872);	ron:TE10_00465	K01610	E4.1.1.49, pckA	phosphoenolpyruvate carboxykinase (ATP) [EC:4.1.1.49]	ko00010,ko00020,ko00620,ko00710	Glycolysis / Gluconeogenesis|Citrate cycle (TCA cycle)|Pyruvate metabolism|Carbon fixation in photosynthetic organisms	STM3500	COG1866	Phosphoenolpyruvate carboxykinase (ATP)	[C]
PHG bin.3
gene1185 1267589 1269208 k141_670926_length_13905_cov_11.0000_6 5702 7321	WP_004906570.1	MULTISPECIES: phosphoenolpyruvate carboxykinase (ATP) [Providencia]	Q7NA45.1	RecName: Full=Phosphoenolpyruvate carboxykinase (ATP); Short=PCK; Short=PEP carboxykinase; Short=PEPCK	Molecular Function: phosphoenolpyruvate carboxykinase (ATP) activity (GO:0004612);|Molecular Function: ATP binding (GO:0005524);|Cellular Component: cytoplasm (GO:0005737);|Biological Process: gluconeogenesis (GO:0006094);|Molecular Function: metal ion binding (GO:0046872);	psx:DR96_1192	K01610	E4.1.1.49, pckA	phosphoenolpyruvate carboxykinase (ATP) [EC:4.1.1.49]	ko00010,ko00020,ko00620,ko00710	Glycolysis / Gluconeogenesis|Citrate cycle (TCA cycle)|Pyruvate metabolism|Carbon fixation in photosynthetic organisms	YPO0138	COG1866	Phosphoenolpyruvate carboxykinase (ATP)	[C]
gene4468 4531416 4530670 k141_427532_length_3931_cov_23.0000_5 3931 3185	WP_133363532.1	phosphoenolpyruvate carboxykinase (ATP) [Weissella sp. 26KH-42]				ega:AL523_12080	K01610	E4.1.1.49, pckA	phosphoenolpyruvate carboxykinase (ATP) [EC:4.1.1.49]	ko00010,ko00020,ko00620,ko00710	Glycolysis / Gluconeogenesis|Citrate cycle (TCA cycle)|Pyruvate metabolism|Carbon fixation in photosynthetic organisms
PHG bin.4
gene0750 759502 761124 k141_193462_length_14706_cov_81.7247 186 1808	WP_095105293.1	MULTISPECIES: phosphoenolpyruvate carboxykinase (ATP) [Enterobacteriaceae]	Q8Z216.1	RecName: Full=Phosphoenolpyruvate carboxykinase (ATP); Short=PCK; Short=PEP carboxykinase; Short=PEPCK	Molecular Function: phosphoenolpyruvate carboxykinase (ATP) activity (GO:0004612);|Molecular Function: ATP binding (GO:0005524);|Cellular Component: cytoplasm (GO:0005737);|Biological Process: gluconeogenesis (GO:0006094);|Molecular Function: metal ion binding (GO:0046872);	ron:TE10_00465	K01610	E4.1.1.49, pckA	phosphoenolpyruvate carboxykinase (ATP) [EC:4.1.1.49]	ko00010,ko00020,ko00620,ko00710	Glycolysis / Gluconeogenesis|Citrate cycle (TCA cycle)|Pyruvate metabolism|Carbon fixation in photosynthetic organisms	STM3500	COG1866	Phosphoenolpyruvate carboxykinase (ATP)	[C]
PHG bin.6
gene2106 1952292 1953932 k141_563022_length_8448_cov_15.0000_5 3208 4848	WP_142463201.1	phosphoenolpyruvate carboxykinase (ATP) [Klebsiella michiganensis]	B2VJU9.1	RecName: Full=Phosphoenolpyruvate carboxykinase (ATP); Short=PCK; Short=PEP carboxykinase; Short=PEPCK	Molecular Function: phosphoenolpyruvate carboxykinase (ATP) activity (GO:0004612);|Molecular Function: ATP binding (GO:0005524);|Cellular Component: cytoplasm (GO:0005737);|Biological Process: gluconeogenesis (GO:0006094);|Molecular Function: metal ion binding (GO:0046872);	koy:J415_14275	K01610	E4.1.1.49, pckA	phosphoenolpyruvate carboxykinase (ATP) [EC:4.1.1.49]	ko00010,ko00020,ko00620,ko00710	Glycolysis / Gluconeogenesis|Citrate cycle (TCA cycle)|Pyruvate metabolism|Carbon fixation in photosynthetic organisms	pckA	COG1866	Phosphoenolpyruvate carboxykinase (ATP)	[C]
gene6120 5500143 5501174 k141_434914_length_2643_cov_41.4880 1 1032	WP_121554294.1	phosphoenolpyruvate carboxykinase (ATP) [Gibbsiella quercinecans]	Q664K7.1	RecName: Full=Phosphoenolpyruvate carboxykinase (ATP); Short=PCK; Short=PEP carboxykinase; Short=PEPCK	Molecular Function: phosphoenolpyruvate carboxykinase (ATP) activity (GO:0004612);|Molecular Function: ATP binding (GO:0005524);|Cellular Component: cytoplasm (GO:0005737);|Biological Process: gluconeogenesis (GO:0006094);|Molecular Function: metal ion binding (GO:0046872);	smw:SMWW4_v1c45710	K01610	E4.1.1.49, pckA	phosphoenolpyruvate carboxykinase (ATP) [EC:4.1.1.49]	ko00010,ko00020,ko00620,ko00710	Glycolysis / Gluconeogenesis|Citrate cycle (TCA cycle)|Pyruvate metabolism|Carbon fixation in photosynthetic organisms	YPO0138	COG1866	Phosphoenolpyruvate carboxykinase (ATP)	[C]
Pyruvate formate lyase
AHG_bin.1
gene1287 1399483 1399019 k141_309260_length_50206_cov_58.8348_13 10233 9769	WP_095104317.1	MULTISPECIES: anaerobic ribonucleoside-triphosphate reductase-activating protein [Enterobacteriaceae]	Q9L645.2	RecName: Full=Anaerobic ribonucleoside-triphosphate reductase-activating protein; AltName: Full=Class III anaerobic ribonucleotide reductase small component	Cellular Component: cytoplasm (GO:0005737);|Molecular Function: [formate-C-acetyltransferase]-activating enzyme activity (GO:0043365);|Molecular Function: metal ion binding (GO:0046872);|Molecular Function: 4 iron, 4 sulfur cluster binding (GO:0051539);	ron:TE10_04680	K04068	nrdG	anaerobic ribonucleoside-triphosphate reductase activating protein [EC:1.97.1.4]			STM4451	COG0602	Organic radical activating enzymes	[O]
AHG bin.4
gene0881 982366 982830 k141_470768_length_16299_cov_100.3830_14 14706 15170	WP_121553670.1	anaerobic ribonucleoside-triphosphate reductase-activating protein [Gibbsiella quercinecans]	P0A9N9.1	RecName: Full=Anaerobic ribonucleoside-triphosphate reductase-activating protein; AltName: Full=Class III anaerobic ribonucleotide reductase small component	Cellular Component: cytoplasm (GO:0005737);|Molecular Function: [formate-C-acetyltransferase]-activating enzyme activity (GO:0043365);|Molecular Function: metal ion binding (GO:0046872);|Molecular Function: 4 iron, 4 sulfur cluster binding (GO:0051539);	smar:SM39_4811	K04068	nrdG	anaerobic ribonucleoside-triphosphate reductase activating protein [EC:1.97.1.4]			ZnrdG	COG0602	Organic radical activating enzymes	[O]
AHG bin.5
gene0534 576446 575850 k141_496248_length_22371_cov_11.3249_8 9855 9259	WP_060814236.1	anaerobic ribonucleoside-triphosphate reductase activating protein [Enterococcus gallinarum]	Q9CM94.1	RecName: Full=Anaerobic ribonucleoside-triphosphate reductase-activating protein; AltName: Full=Class III anaerobic ribonucleotide reductase small component	Cellular Component: cytoplasm (GO:0005737);|Molecular Function: [formate-C-acetyltransferase]-activating enzyme activity (GO:0043365);|Molecular Function: metal ion binding (GO:0046872);|Molecular Function: 4 iron, 4 sulfur cluster binding (GO:0051539);	efi:OG1RF_12116	K04068	nrdG	anaerobic ribonucleoside-triphosphate reductase activating protein [EC:1.97.1.4]			L72609	COG0602	Organic radical activating enzymes	[O]
FG bin.1
gene3250 3455058 3454594 k141_39401_length_10334_cov_65.5199_4 4009 3545	WP_095104317.1	MULTISPECIES: anaerobic ribonucleoside-triphosphate reductase-activating protein [Enterobacteriaceae]	Q9L645.2	RecName: Full=Anaerobic ribonucleoside-triphosphate reductase-activating protein; AltName: Full=Class III anaerobic ribonucleotide reductase small component	Cellular Component: cytoplasm (GO:0005737);|Molecular Function: [formate-C-acetyltransferase]-activating enzyme activity (GO:0043365);|Molecular Function: metal ion binding (GO:0046872);|Molecular Function: 4 iron, 4 sulfur cluster binding (GO:0051539);	ron:TE10_04680	K04068	nrdG	anaerobic ribonucleoside-triphosphate reductase activating protein [EC:1.97.1.4]			STM4451	COG0602	Organic radical activating enzymes	[O]
MG bin.1
gene2713 2739990 2739526 k141_355956_length_11452_cov_14.0000_5 5252 4788	WP_095104317.1	MULTISPECIES: anaerobic ribonucleoside-triphosphate reductase-activating protein [Enterobacteriaceae]	Q9L645.2	RecName: Full=Anaerobic ribonucleoside-triphosphate reductase-activating protein; AltName: Full=Class III anaerobic ribonucleotide reductase small component	Cellular Component: cytoplasm (GO:0005737);|Molecular Function: [formate-C-acetyltransferase]-activating enzyme activity (GO:0043365);|Molecular Function: metal ion binding (GO:0046872);|Molecular Function: 4 iron, 4 sulfur cluster binding (GO:0051539);	ron:TE10_04680	K04068	nrdG	anaerobic ribonucleoside-triphosphate reductase activating protein [EC:1.97.1.4]			STM4451	COG0602	Organic radical activating enzymes	[O]
PHG bin.2
gene2149 2471820 2471275 k141_483246_length_218684_cov_27.0668_132 135386 134841	WP_087880869.1	anaerobic ribonucleoside-triphosphate reductase activating protein [Dysgonomonas capnocytophagoides]	P45080.1	RecName: Full=Anaerobic ribonucleoside-triphosphate reductase-activating protein; AltName: Full=Class III anaerobic ribonucleotide reductase small component	Cellular Component: cytoplasm (GO:0005737);|Molecular Function: [formate-C-acetyltransferase]-activating enzyme activity (GO:0043365);|Molecular Function: metal ion binding (GO:0046872);|Molecular Function: 4 iron, 4 sulfur cluster binding (GO:0051539);	bth:BT_1999	K04068	nrdG	anaerobic ribonucleoside-triphosphate reductase activating protein [EC:1.97.1.4]			CAC0481	COG0602	Organic radical activating enzymes	[O]
PHG bin.3
gene3508 3665675 3666139 k141_271616_length_5628_cov_18.0000_2 1918 2382	WP_004907505.1	MULTISPECIES: anaerobic ribonucleoside-triphosphate reductase-activating protein [Providencia]	P0A9N9.1	RecName: Full=Anaerobic ribonucleoside-triphosphate reductase-activating protein; AltName: Full=Class III anaerobic ribonucleotide reductase small component	Cellular Component: cytoplasm (GO:0005737);|Molecular Function: [formate-C-acetyltransferase]-activating enzyme activity (GO:0043365);|Molecular Function: metal ion binding (GO:0046872);|Molecular Function: 4 iron, 4 sulfur cluster binding (GO:0051539);	psi:S70_12285	K04068	nrdG	anaerobic ribonucleoside-triphosphate reductase activating protein [EC:1.97.1.4]			nrdG	COG0602	Organic radical activating enzymes	[O]
PHG bin.4
gene2719 2746123 2745659 k141_110813_length_6162_cov_119.0749_2 2017 1553	WP_095104317.1	MULTISPECIES: anaerobic ribonucleoside-triphosphate reductase-activating protein [Enterobacteriaceae]	Q9L645.2	RecName: Full=Anaerobic ribonucleoside-triphosphate reductase-activating protein; AltName: Full=Class III anaerobic ribonucleotide reductase small component	Cellular Component: cytoplasm (GO:0005737);|Molecular Function: [formate-C-acetyltransferase]-activating enzyme activity (GO:0043365);|Molecular Function: metal ion binding (GO:0046872);|Molecular Function: 4 iron, 4 sulfur cluster binding (GO:0051539);	ron:TE10_04680	K04068	nrdG	anaerobic ribonucleoside-triphosphate reductase activating protein [EC:1.97.1.4]			STM4451	COG0602	Organic radical activating enzymes	[O]
PHG bin.9
gene0234 275072 275668 k141_703374_length_90693_cov_48.4279_67 80696 81292	WP_060814236.1	anaerobic ribonucleoside-triphosphate reductase activating protein [Enterococcus gallinarum]	Q9CM94.1	RecName: Full=Anaerobic ribonucleoside-triphosphate reductase-activating protein; AltName: Full=Class III anaerobic ribonucleotide reductase small component	Cellular Component: cytoplasm (GO:0005737);|Molecular Function: [formate-C-acetyltransferase]-activating enzyme activity (GO:0043365);|Molecular Function: metal ion binding (GO:0046872);|Molecular Function: 4 iron, 4 sulfur cluster binding (GO:0051539);	efi:OG1RF_12116	K04068	nrdG	anaerobic ribonucleoside-triphosphate reductase activating protein [EC:1.97.1.4]			L72609	COG0602	Organic radical activating enzymes	[O]
AHG_bin.1
gene1606 1745924 1745184 k141_462725_length_45782_cov_44.8213_15 17587 16847	WP_041144788.1	MULTISPECIES: pyruvate formate lyase 1-activating protein [Enterobacteriaceae]	P0A9N6.2	RecName: Full=Pyruvate formate-lyase 1-activating enzyme; AltName: Full=Formate-C-acetyltransferase-activating enzyme 1; AltName: Full=PFL-activating enzyme 1	Cellular Component: cytoplasm (GO:0005737);|Biological Process: glucose metabolic process (GO:0006006);|Molecular Function: [formate-C-acetyltransferase]-activating enzyme activity (GO:0043365);|Molecular Function: metal ion binding (GO:0046872);|Molecular Function: 4 iron, 4 sulfur cluster binding (GO:0051539);	ron:TE10_10380	K04069	pflA, pflC, pflE	pyruvate formate lyase activating enzyme [EC:1.97.1.4]			pflA	COG1180	Pyruvate-formate lyase-activating enzyme	[O]
gene1711 1869993 1869094 k141_181868_length_42114_cov_42.7815_7 8637 7738	WP_095095431.1	MULTISPECIES: glycyl-radical enzyme activating protein [Enterobacteriaceae]	P75794.2	RecName: Full=Putative pyruvate formate-lyase 3-activating enzyme; AltName: Full=Formate-C-acetyltransferase-activating enzyme 3; AltName: Full=PFL-activating enzyme 3	Cellular Component: cytoplasm (GO:0005737);|Molecular Function: [formate-C-acetyltransferase]-activating enzyme activity (GO:0043365);|Molecular Function: metal ion binding (GO:0046872);|Molecular Function: 4 iron, 4 sulfur cluster binding (GO:0051539);	ron:TE10_10010	K04069	pflA, pflC, pflE	pyruvate formate lyase activating enzyme [EC:1.97.1.4]			ybiY	COG1180	Pyruvate-formate lyase-activating enzyme	[O]
gene2208 2408202 2409077 k141_155261_length_37845_cov_47.2306_14 16759 17634	WP_095096157.1	MULTISPECIES: [formate-C-acetyltransferase]-activating enzyme [Enterobacteriaceae]	P32675.2	RecName: Full=Pyruvate formate-lyase 2-activating enzyme; AltName: Full=Formate-C-acetyltransferase-activating enzyme 2; AltName: Full=PFL-activating enzyme 2	Cellular Component: cytoplasm (GO:0005737);|Biological Process: glucose metabolic process (GO:0006006);|Molecular Function: [formate-C-acetyltransferase]-activating enzyme activity (GO:0043365);|Molecular Function: metal ion binding (GO:0046872);|Molecular Function: 4 iron, 4 sulfur cluster binding (GO:0051539);	ron:TE10_10965	K04069	pflA, pflC, pflE	pyruvate formate lyase activating enzyme [EC:1.97.1.4]			STM4115	COG1180	Pyruvate-formate lyase-activating enzyme	[O]
AHG bin.4
gene0080 92449 93189 k141_276850_length_35667_cov_46.0347_11 15231 15971	WP_095848051.1	pyruvate formate lyase 1-activating protein [Gibbsiella quercinecans]	P0A9N6.2	RecName: Full=Pyruvate formate-lyase 1-activating enzyme; AltName: Full=Formate-C-acetyltransferase-activating enzyme 1; AltName: Full=PFL-activating enzyme 1	Cellular Component: cytoplasm (GO:0005737);|Biological Process: glucose metabolic process (GO:0006006);|Molecular Function: [formate-C-acetyltransferase]-activating enzyme activity (GO:0043365);|Molecular Function: metal ion binding (GO:0046872);|Molecular Function: 4 iron, 4 sulfur cluster binding (GO:0051539);	slq:M495_08010	K04069	pflA, pflC, pflE	pyruvate formate lyase activating enzyme [EC:1.97.1.4]			YPO1381	COG1180	Pyruvate-formate lyase-activating enzyme	[O]
gene3139 3286939 3287838 k141_210627_length_4979_cov_46.0221_2 1951 2850	WP_095848204.1	glycyl-radical enzyme activating protein [Gibbsiella quercinecans]	P75794.2	RecName: Full=Putative pyruvate formate-lyase 3-activating enzyme; AltName: Full=Formate-C-acetyltransferase-activating enzyme 3; AltName: Full=PFL-activating enzyme 3	Cellular Component: cytoplasm (GO:0005737);|Molecular Function: [formate-C-acetyltransferase]-activating enzyme activity (GO:0043365);|Molecular Function: metal ion binding (GO:0046872);|Molecular Function: 4 iron, 4 sulfur cluster binding (GO:0051539);	enc:ECL_02895	K04069	pflA, pflC, pflE	pyruvate formate lyase activating enzyme [EC:1.97.1.4]			STM0844	COG1180	Pyruvate-formate lyase-activating enzyme	[O]
gene3064 3213692 3212943 k141_308657_length_5238_cov_76.7822_5 5238 4489	WP_121552766.1	[formate-C-acetyltransferase]-activating enzyme [Gibbsiella quercinecans]	P32675.2	RecName: Full=Pyruvate formate-lyase 2-activating enzyme; AltName: Full=Formate-C-acetyltransferase-activating enzyme 2; AltName: Full=PFL-activating enzyme 2	Cellular Component: cytoplasm (GO:0005737);|Biological Process: glucose metabolic process (GO:0006006);|Molecular Function: [formate-C-acetyltransferase]-activating enzyme activity (GO:0043365);|Molecular Function: metal ion binding (GO:0046872);|Molecular Function: 4 iron, 4 sulfur cluster binding (GO:0051539);	sfw:WN53_09645	K04069	pflA, pflC, pflE	pyruvate formate lyase activating enzyme [EC:1.97.1.4]			STM4115	COG1180	Pyruvate-formate lyase-activating enzyme	[O]
gene3827 3930094 3930987 k141_83208_length_2749_cov_35.6354_2 1799 2692	WP_121552766.1	[formate-C-acetyltransferase]-activating enzyme [Gibbsiella quercinecans]	P32675.2	RecName: Full=Pyruvate formate-lyase 2-activating enzyme; AltName: Full=Formate-C-acetyltransferase-activating enzyme 2; AltName: Full=PFL-activating enzyme 2	Cellular Component: cytoplasm (GO:0005737);|Biological Process: glucose metabolic process (GO:0006006);|Molecular Function: [formate-C-acetyltransferase]-activating enzyme activity (GO:0043365);|Molecular Function: metal ion binding (GO:0046872);|Molecular Function: 4 iron, 4 sulfur cluster binding (GO:0051539);	sfw:WN53_09645	K04069	pflA, pflC, pflE	pyruvate formate lyase activating enzyme [EC:1.97.1.4]			pflC	COG1180	Pyruvate-formate lyase-activating enzyme	[O]
AHG bin.5
gene1142 1229593 1228652 k141_61792_length_13410_cov_14.9388_11 10029 9088	OTO15392.1	hypothetical protein A5875_004550 [Enterococcus sp. 3H8_DIV0648]	Q30W71.2	RecName: Full=Choline trimethylamine-lyase activating enzyme; AltName: Full=Choline utilization protein D; AltName: Full=GRE activase CutD; AltName: Full=Glycyl-radical enzyme activating enzyme CutD; Short=GRE activating enzyme CutD	Biological Process: choline catabolic process (GO:0042426);|Molecular Function: glycyl-radical enzyme activating activity (GO:0043364);|Molecular Function: metal ion binding (GO:0046872);|Molecular Function: 4 iron, 4 sulfur cluster binding (GO:0051539);|Molecular Function: radical SAM enzyme activity (GO:0070283);	cpas:Clopa_4022	K04069	pflA, pflC, pflE	pyruvate formate lyase activating enzyme [EC:1.97.1.4]			AF1450	COG1180	Pyruvate-formate lyase-activating enzyme	[O]
gene3572 3592352 3593125 k141_76597_length_2059_cov_7.0000_2 1284 2057	WP_161900780.1	pyruvate formate lyase-activating protein [Enterococcus sp. CU12B]	O68575.1	RecName: Full=Pyruvate formate-lyase-activating enzyme; Short=PFL-activating enzyme; AltName: Full=Formate-C-acetyltransferase-activating enzyme	Cellular Component: cytoplasm (GO:0005737);|Molecular Function: [formate-C-acetyltransferase]-activating enzyme activity (GO:0043365);|Molecular Function: metal ion binding (GO:0046872);|Molecular Function: 4 iron, 4 sulfur cluster binding (GO:0051539);	efi:OG1RF_11328	K04069	pflA, pflC, pflE	pyruvate formate lyase activating enzyme [EC:1.97.1.4]			SP1976	COG1180	Pyruvate-formate lyase-activating enzyme	[O]
FG bin.1
gene1170 1243880 1242981 k141_136339_length_25084_cov_68.2268_5 6738 5839	WP_095095431.1	MULTISPECIES: glycyl-radical enzyme activating protein [Enterobacteriaceae]	P75794.2	RecName: Full=Putative pyruvate formate-lyase 3-activating enzyme; AltName: Full=Formate-C-acetyltransferase-activating enzyme 3; AltName: Full=PFL-activating enzyme 3	Cellular Component: cytoplasm (GO:0005737);|Molecular Function: [formate-C-acetyltransferase]-activating enzyme activity (GO:0043365);|Molecular Function: metal ion binding (GO:0046872);|Molecular Function: 4 iron, 4 sulfur cluster binding (GO:0051539);	ron:TE10_10010	K04069	pflA, pflC, pflE	pyruvate formate lyase activating enzyme [EC:1.97.1.4]			ybiY	COG1180	Pyruvate-formate lyase-activating enzyme	[O]
gene3070 3275845 3274970 k141_127576_length_11345_cov_65.8137_8 7220 6345	WP_133597356.1	[formate-C-acetyltransferase]-activating enzyme [Raoultella sp. BIGb0149]	P32675.2	RecName: Full=Pyruvate formate-lyase 2-activating enzyme; AltName: Full=Formate-C-acetyltransferase-activating enzyme 2; AltName: Full=PFL-activating enzyme 2	Cellular Component: cytoplasm (GO:0005737);|Biological Process: glucose metabolic process (GO:0006006);|Molecular Function: [formate-C-acetyltransferase]-activating enzyme activity (GO:0043365);|Molecular Function: metal ion binding (GO:0046872);|Molecular Function: 4 iron, 4 sulfur cluster binding (GO:0051539);	ron:TE10_10965	K04069	pflA, pflC, pflE	pyruvate formate lyase activating enzyme [EC:1.97.1.4]			STM4115	COG1180	Pyruvate-formate lyase-activating enzyme	[O]
gene3547 3753887 3753147 k141_433664_length_8848_cov_93.5001_8 6876 6136	WP_041144788.1	MULTISPECIES: pyruvate formate lyase 1-activating protein [Enterobacteriaceae]	P0A9N6.2	RecName: Full=Pyruvate formate-lyase 1-activating enzyme; AltName: Full=Formate-C-acetyltransferase-activating enzyme 1; AltName: Full=PFL-activating enzyme 1	Cellular Component: cytoplasm (GO:0005737);|Biological Process: glucose metabolic process (GO:0006006);|Molecular Function: [formate-C-acetyltransferase]-activating enzyme activity (GO:0043365);|Molecular Function: metal ion binding (GO:0046872);|Molecular Function: 4 iron, 4 sulfur cluster binding (GO:0051539);	ron:TE10_10380	K04069	pflA, pflC, pflE	pyruvate formate lyase activating enzyme [EC:1.97.1.4]			pflA	COG1180	Pyruvate-formate lyase-activating enzyme	[O]
MG bin.1
gene0965 1002871 1001972 k141_521092_length_20073_cov_9.0000_7 9493 8594	WP_095095431.1	MULTISPECIES: glycyl-radical enzyme activating protein [Enterobacteriaceae]	P75794.2	RecName: Full=Putative pyruvate formate-lyase 3-activating enzyme; AltName: Full=Formate-C-acetyltransferase-activating enzyme 3; AltName: Full=PFL-activating enzyme 3	Cellular Component: cytoplasm (GO:0005737);|Molecular Function: [formate-C-acetyltransferase]-activating enzyme activity (GO:0043365);|Molecular Function: metal ion binding (GO:0046872);|Molecular Function: 4 iron, 4 sulfur cluster binding (GO:0051539);	ron:TE10_10010	K04069	pflA, pflC, pflE	pyruvate formate lyase activating enzyme [EC:1.97.1.4]			ybiY	COG1180	Pyruvate-formate lyase-activating enzyme	[O]
gene1843 1896546 1895671 k141_42113_length_15039_cov_15.6893_4 2521 1646	WP_133597356.1	[formate-C-acetyltransferase]-activating enzyme [Raoultella sp. BIGb0149]	P32675.2	RecName: Full=Pyruvate formate-lyase 2-activating enzyme; AltName: Full=Formate-C-acetyltransferase-activating enzyme 2; AltName: Full=PFL-activating enzyme 2	Cellular Component: cytoplasm (GO:0005737);|Biological Process: glucose metabolic process (GO:0006006);|Molecular Function: [formate-C-acetyltransferase]-activating enzyme activity (GO:0043365);|Molecular Function: metal ion binding (GO:0046872);|Molecular Function: 4 iron, 4 sulfur cluster binding (GO:0051539);	ron:TE10_10965	K04069	pflA, pflC, pflE	pyruvate formate lyase activating enzyme [EC:1.97.1.4]			STM4115	COG1180	Pyruvate-formate lyase-activating enzyme	[O]
gene4544 4519160 4518420 k141_589993_length_5821_cov_15.0000_4 2393 1653	WP_041144788.1	MULTISPECIES: pyruvate formate lyase 1-activating protein [Enterobacteriaceae]	P0A9N6.2	RecName: Full=Pyruvate formate-lyase 1-activating enzyme; AltName: Full=Formate-C-acetyltransferase-activating enzyme 1; AltName: Full=PFL-activating enzyme 1	Cellular Component: cytoplasm (GO:0005737);|Biological Process: glucose metabolic process (GO:0006006);|Molecular Function: [formate-C-acetyltransferase]-activating enzyme activity (GO:0043365);|Molecular Function: metal ion binding (GO:0046872);|Molecular Function: 4 iron, 4 sulfur cluster binding (GO:0051539);	ron:TE10_10380	K04069	pflA, pflC, pflE	pyruvate formate lyase activating enzyme [EC:1.97.1.4]			pflA	COG1180	Pyruvate-formate lyase-activating enzyme	[O]
PHG bin.2
gene0603 701283 702017 k141_313111_length_415938_cov_34.1247_6 13153 13887	WP_165021741.1	pyruvate formate lyase-activating protein [Dysgonomonas sp. ZJ279]	Q5HKI0.1	RecName: Full=Pyruvate formate-lyase-activating enzyme; Short=PFL-activating enzyme	Cellular Component: cytoplasm (GO:0005737);|Biological Process: glucose metabolic process (GO:0006006);|Molecular Function: [formate-C-acetyltransferase]-activating enzyme activity (GO:0043365);|Molecular Function: metal ion binding (GO:0046872);|Molecular Function: 4 iron, 4 sulfur cluster binding (GO:0051539);	leo:AMK43_08345	K04069	pflA, pflC, pflE	pyruvate formate lyase activating enzyme [EC:1.97.1.4]			FN0261	COG1180	Pyruvate-formate lyase-activating enzyme	[O]
PHG bin.3
gene4110 4209522 4209749 k141_593433_length_4470_cov_11.8526_4 4243 4470	EKT57849.1	pyruvate formate lyase-activating enzyme 1 [Providencia rettgeri Dmel1]	P0A9N6.2	RecName: Full=Pyruvate formate-lyase 1-activating enzyme; AltName: Full=Formate-C-acetyltransferase-activating enzyme 1; AltName: Full=PFL-activating enzyme 1	Cellular Component: cytoplasm (GO:0005737);|Biological Process: glucose metabolic process (GO:0006006);|Molecular Function: [formate-C-acetyltransferase]-activating enzyme activity (GO:0043365);|Molecular Function: metal ion binding (GO:0046872);|Molecular Function: 4 iron, 4 sulfur cluster binding (GO:0051539);	pvl:AOB99_05915	K04069	pflA, pflC, pflE	pyruvate formate lyase activating enzyme [EC:1.97.1.4]			YPO1381	COG1180	Pyruvate-formate lyase-activating enzyme	[O]
gene4169 4267259 4267894 k141_69726_length_4333_cov_12.0000 1 636	EKT57849.1	pyruvate formate lyase-activating enzyme 1 [Providencia rettgeri Dmel1]	P0A9N6.2	RecName: Full=Pyruvate formate-lyase 1-activating enzyme; AltName: Full=Formate-C-acetyltransferase-activating enzyme 1; AltName: Full=PFL-activating enzyme 1	Cellular Component: cytoplasm (GO:0005737);|Biological Process: glucose metabolic process (GO:0006006);|Molecular Function: [formate-C-acetyltransferase]-activating enzyme activity (GO:0043365);|Molecular Function: metal ion binding (GO:0046872);|Molecular Function: 4 iron, 4 sulfur cluster binding (GO:0051539);	psx:DR96_2376	K04069	pflA, pflC, pflE	pyruvate formate lyase activating enzyme [EC:1.97.1.4]			YPO1381	COG1180	Pyruvate-formate lyase-activating enzyme	[O]
PHG bin.4
gene1087 1121594 1121857 k141_77098_length_12414_cov_120.2099 1 264	WP_159236485.1	MULTISPECIES: [formate-C-acetyltransferase]-activating enzyme [unclassified Raoultella]	P32675.2	RecName: Full=Pyruvate formate-lyase 2-activating enzyme; AltName: Full=Formate-C-acetyltransferase-activating enzyme 2; AltName: Full=PFL-activating enzyme 2	Cellular Component: cytoplasm (GO:0005737);|Biological Process: glucose metabolic process (GO:0006006);|Molecular Function: [formate-C-acetyltransferase]-activating enzyme activity (GO:0043365);|Molecular Function: metal ion binding (GO:0046872);|Molecular Function: 4 iron, 4 sulfur cluster binding (GO:0051539);	ron:TE10_10965	K04069	pflA, pflC, pflE	pyruvate formate lyase activating enzyme [EC:1.97.1.4]			ECs4881	COG1180	Pyruvate-formate lyase-activating enzyme	[O]
gene1880 1936851 1937750 k141_621073_length_8517_cov_494.3155_6 6739 7638	WP_095095431.1	MULTISPECIES: glycyl-radical enzyme activating protein [Enterobacteriaceae]	P75794.2	RecName: Full=Putative pyruvate formate-lyase 3-activating enzyme; AltName: Full=Formate-C-acetyltransferase-activating enzyme 3; AltName: Full=PFL-activating enzyme 3	Cellular Component: cytoplasm (GO:0005737);|Molecular Function: [formate-C-acetyltransferase]-activating enzyme activity (GO:0043365);|Molecular Function: metal ion binding (GO:0046872);|Molecular Function: 4 iron, 4 sulfur cluster binding (GO:0051539);	ron:TE10_10010	K04069	pflA, pflC, pflE	pyruvate formate lyase activating enzyme [EC:1.97.1.4]			ybiY	COG1180	Pyruvate-formate lyase-activating enzyme	[O]
gene2099 2153680 2154285 k141_139219_length_7611_cov_69.9186_6 7004 7609	WP_095096157.1	MULTISPECIES: [formate-C-acetyltransferase]-activating enzyme [Enterobacteriaceae]	P32675.2	RecName: Full=Pyruvate formate-lyase 2-activating enzyme; AltName: Full=Formate-C-acetyltransferase-activating enzyme 2; AltName: Full=PFL-activating enzyme 2	Cellular Component: cytoplasm (GO:0005737);|Biological Process: glucose metabolic process (GO:0006006);|Molecular Function: [formate-C-acetyltransferase]-activating enzyme activity (GO:0043365);|Molecular Function: metal ion binding (GO:0046872);|Molecular Function: 4 iron, 4 sulfur cluster binding (GO:0051539);	ron:TE10_10965	K04069	pflA, pflC, pflE	pyruvate formate lyase activating enzyme [EC:1.97.1.4]			STM4115	COG1180	Pyruvate-formate lyase-activating enzyme	[O]
PHG bin.6
gene4353 3991825 3992724 k141_53320_length_4582_cov_14.6438_3 2032 2931	WP_004130791.1	MULTISPECIES: glycyl-radical enzyme activating protein [Klebsiella]	P75794.2	RecName: Full=Putative pyruvate formate-lyase 3-activating enzyme; AltName: Full=Formate-C-acetyltransferase-activating enzyme 3; AltName: Full=PFL-activating enzyme 3	Cellular Component: cytoplasm (GO:0005737);|Molecular Function: [formate-C-acetyltransferase]-activating enzyme activity (GO:0043365);|Molecular Function: metal ion binding (GO:0046872);|Molecular Function: 4 iron, 4 sulfur cluster binding (GO:0051539);	kom:HR38_14045	K04069	pflA, pflC, pflE	pyruvate formate lyase activating enzyme [EC:1.97.1.4]			STM0844	COG1180	Pyruvate-formate lyase-activating enzyme	[O]
PHG bin.9
gene0480 561776 562717 k141_604993_length_61791_cov_37.9217_31 39948 40889	OTO15392.1	hypothetical protein A5875_004550 [Enterococcus sp. 3H8_DIV0648]	Q30W71.2	RecName: Full=Choline trimethylamine-lyase activating enzyme; AltName: Full=Choline utilization protein D; AltName: Full=GRE activase CutD; AltName: Full=Glycyl-radical enzyme activating enzyme CutD; Short=GRE activating enzyme CutD	Biological Process: choline catabolic process (GO:0042426);|Molecular Function: glycyl-radical enzyme activating activity (GO:0043364);|Molecular Function: metal ion binding (GO:0046872);|Molecular Function: 4 iron, 4 sulfur cluster binding (GO:0051539);|Molecular Function: radical SAM enzyme activity (GO:0070283);	cpas:Clopa_4022	K04069	pflA, pflC, pflE	pyruvate formate lyase activating enzyme [EC:1.97.1.4]			AF1450	COG1180	Pyruvate-formate lyase-activating enzyme	[O]
gene0678 790793 791572 k141_487240_length_49988_cov_36.9890_41 45945 46724	WP_161900780.1	pyruvate formate lyase-activating protein [Enterococcus sp. CU12B]	O68575.1	RecName: Full=Pyruvate formate-lyase-activating enzyme; Short=PFL-activating enzyme; AltName: Full=Formate-C-acetyltransferase-activating enzyme	Cellular Component: cytoplasm (GO:0005737);|Molecular Function: [formate-C-acetyltransferase]-activating enzyme activity (GO:0043365);|Molecular Function: metal ion binding (GO:0046872);|Molecular Function: 4 iron, 4 sulfur cluster binding (GO:0051539);	efl:EF62_1994	K04069	pflA, pflC, pflE	pyruvate formate lyase activating enzyme [EC:1.97.1.4]			SP1976	COG1180	Pyruvate-formate lyase-activating enzyme	[O]
AHG_bin.1
gene1607 1748412 1746130 k141_462725_length_45782_cov_44.8213_16 20075 17793	WP_095095657.1	MULTISPECIES: formate C-acetyltransferase [Enterobacteriaceae]	P09373.2	RecName: Full=Formate acetyltransferase 1; AltName: Full=Pyruvate formate-lyase 1	Cellular Component: cytosol (GO:0005829);|Biological Process: glucose metabolic process (GO:0006006);|Biological Process: threonine catabolic process (GO:0006567);|Molecular Function: formate C-acetyltransferase activity (GO:0008861);|Cellular Component: membrane (GO:0016020);	ron:TE10_10385	K00656	E2.3.1.54, pflD	formate C-acetyltransferase [EC:2.3.1.54]	ko00620,ko00640,ko00650	Pyruvate metabolism|Propanoate metabolism|Butanoate metabolism	STM0973	COG1882	Pyruvate-formate lyase	[C]
gene1710 1869092 1866657 k141_181868_length_42114_cov_42.7815_6 7736 5301	WP_095097999.1	MULTISPECIES: formate C-acetyltransferase/glycerol dehydratase family glycyl radical enzyme [Enterobacteriaceae]	P75793.1	RecName: Full=Putative formate acetyltransferase 3; AltName: Full=Pyruvate formate-lyase 3	Cellular Component: cytosol (GO:0005829);|Biological Process: carbohydrate metabolic process (GO:0005975);|Molecular Function: formate C-acetyltransferase activity (GO:0008861);	ron:TE10_10005	K00656	E2.3.1.54, pflD	formate C-acetyltransferase [EC:2.3.1.54]	ko00620,ko00640,ko00650	Pyruvate metabolism|Propanoate metabolism|Butanoate metabolism	ybiW	COG1882	Pyruvate-formate lyase	[C]
gene2207 2405939 2408236 k141_155261_length_37845_cov_47.2306_13 14496 16793	WP_095096159.1	MULTISPECIES: formate C-acetyltransferase [Enterobacteriaceae]	P32674.1	RecName: Full=Formate acetyltransferase 2; AltName: Full=Pyruvate formate-lyase 2	Cellular Component: cytoplasm (GO:0005737);|Biological Process: metabolic process (GO:0008152);|Molecular Function: formate C-acetyltransferase activity (GO:0008861);	ron:TE10_10970	K00656	E2.3.1.54, pflD	formate C-acetyltransferase [EC:2.3.1.54]	ko00620,ko00640,ko00650	Pyruvate metabolism|Propanoate metabolism|Butanoate metabolism	pflD	COG1882	Pyruvate-formate lyase	[C]
AHG bin.4
gene0079 89768 92050 k141_276850_length_35667_cov_46.0347_10 12550 14832	WP_095848052.1	formate C-acetyltransferase [Gibbsiella quercinecans]	P09373.2	RecName: Full=Formate acetyltransferase 1; AltName: Full=Pyruvate formate-lyase 1	Cellular Component: cytosol (GO:0005829);|Biological Process: glucose metabolic process (GO:0006006);|Biological Process: threonine catabolic process (GO:0006567);|Molecular Function: formate C-acetyltransferase activity (GO:0008861);|Cellular Component: membrane (GO:0016020);	smaf:D781_1607	K00656	E2.3.1.54, pflD	formate C-acetyltransferase [EC:2.3.1.54]	ko00620,ko00640,ko00650	Pyruvate metabolism|Propanoate metabolism|Butanoate metabolism	pflB	COG1882	Pyruvate-formate lyase	[C]
gene3140 3287843 3289966 k141_210627_length_4979_cov_46.0221_3 2855 4978	WP_095848205.1	formate C-acetyltransferase/glycerol dehydratase family glycyl radical enzyme [Gibbsiella quercinecans]	P75793.1	RecName: Full=Putative formate acetyltransferase 3; AltName: Full=Pyruvate formate-lyase 3	Cellular Component: cytosol (GO:0005829);|Biological Process: carbohydrate metabolic process (GO:0005975);|Molecular Function: formate C-acetyltransferase activity (GO:0008861);	eci:UTI89_C0826	K00656	E2.3.1.54, pflD	formate C-acetyltransferase [EC:2.3.1.54]	ko00620,ko00640,ko00650	Pyruvate metabolism|Propanoate metabolism|Butanoate metabolism	ybiW	COG1882	Pyruvate-formate lyase	[C]
gene3214 3359536 3358679 k141_254839_length_4784_cov_71.0825 860 3	WP_095846303.1	formate C-acetyltransferase [Gibbsiella quercinecans]	P32674.1	RecName: Full=Formate acetyltransferase 2; AltName: Full=Pyruvate formate-lyase 2	Cellular Component: cytoplasm (GO:0005737);|Biological Process: metabolic process (GO:0008152);|Molecular Function: formate C-acetyltransferase activity (GO:0008861);	sfw:WN53_09650	K00656	E2.3.1.54, pflD	formate C-acetyltransferase [EC:2.3.1.54]	ko00620,ko00640,ko00650	Pyruvate metabolism|Propanoate metabolism|Butanoate metabolism	ECs4880	COG1882	Pyruvate-formate lyase	[C]
gene3826 3928296 3930128 k141_83208_length_2749_cov_35.6354 1 1833	WP_121552765.1	formate C-acetyltransferase [Gibbsiella quercinecans]	P32674.1	RecName: Full=Formate acetyltransferase 2; AltName: Full=Pyruvate formate-lyase 2	Cellular Component: cytoplasm (GO:0005737);|Biological Process: metabolic process (GO:0008152);|Molecular Function: formate C-acetyltransferase activity (GO:0008861);	sfw:WN53_09650	K00656	E2.3.1.54, pflD	formate C-acetyltransferase [EC:2.3.1.54]	ko00620,ko00640,ko00650	Pyruvate metabolism|Propanoate metabolism|Butanoate metabolism	ECs4880	COG1882	Pyruvate-formate lyase	[C]
AHG bin.5
gene3504 3541351 3542457 k141_216001_length_2349_cov_10.0000_2 1243 2349	WP_067624215.1	formate C-acetyltransferase [Enterococcus pseudoavium]	Q6GCQ0.1	RecName: Full=Formate acetyltransferase; AltName: Full=Pyruvate formate-lyase	Cellular Component: cytoplasm (GO:0005737);|Biological Process: glucose metabolic process (GO:0006006);|Molecular Function: formate C-acetyltransferase activity (GO:0008861);	cck:Ccar_13425	K00656	E2.3.1.54, pflD	formate C-acetyltransferase [EC:2.3.1.54]	ko00620,ko00640,ko00650	Pyruvate metabolism|Propanoate metabolism|Butanoate metabolism	SA0218	COG1882	Pyruvate-formate lyase	[C]
gene3571 3591069 3592157 k141_76597_length_2059_cov_7.0000 1 1089	WP_071131465.1	formate C-acetyltransferase [Enterococcus timonensis]	Q6GCQ0.1	RecName: Full=Formate acetyltransferase; AltName: Full=Pyruvate formate-lyase	Cellular Component: cytoplasm (GO:0005737);|Biological Process: glucose metabolic process (GO:0006006);|Molecular Function: formate C-acetyltransferase activity (GO:0008861);	bprl:CL2_09780	K00656	E2.3.1.54, pflD	formate C-acetyltransferase [EC:2.3.1.54]	ko00620,ko00640,ko00650	Pyruvate metabolism|Propanoate metabolism|Butanoate metabolism	lin1443	COG1882	Pyruvate-formate lyase	[C]
FG bin.1
gene1169 1242979 1240544 k141_136339_length_25084_cov_68.2268_4 5837 3402	WP_095097999.1	MULTISPECIES: formate C-acetyltransferase/glycerol dehydratase family glycyl radical enzyme [Enterobacteriaceae]	P75793.1	RecName: Full=Putative formate acetyltransferase 3; AltName: Full=Pyruvate formate-lyase 3	Cellular Component: cytosol (GO:0005829);|Biological Process: carbohydrate metabolic process (GO:0005975);|Molecular Function: formate C-acetyltransferase activity (GO:0008861);	ron:TE10_10005	K00656	E2.3.1.54, pflD	formate C-acetyltransferase [EC:2.3.1.54]	ko00620,ko00640,ko00650	Pyruvate metabolism|Propanoate metabolism|Butanoate metabolism	ybiW	COG1882	Pyruvate-formate lyase	[C]
gene2363 2520801 2520145 k141_117495_length_15229_cov_67.4568 657 1	WP_123707185.1	MULTISPECIES: formate C-acetyltransferase [Raoultella]	P09373.2	RecName: Full=Formate acetyltransferase 1; AltName: Full=Pyruvate formate-lyase 1	Cellular Component: cytosol (GO:0005829);|Biological Process: glucose metabolic process (GO:0006006);|Biological Process: threonine catabolic process (GO:0006567);|Molecular Function: formate C-acetyltransferase activity (GO:0008861);|Cellular Component: membrane (GO:0016020);	ron:TE10_10385	K00656	E2.3.1.54, pflD	formate C-acetyltransferase [EC:2.3.1.54]	ko00620,ko00640,ko00650	Pyruvate metabolism|Propanoate metabolism|Butanoate metabolism	STM0973	COG1882	Pyruvate-formate lyase	[C]
gene3071 3278108 3275811 k141_127576_length_11345_cov_65.8137_9 9483 7186	WP_159236484.1	MULTISPECIES: formate C-acetyltransferase [unclassified Raoultella]	P32674.1	RecName: Full=Formate acetyltransferase 2; AltName: Full=Pyruvate formate-lyase 2	Cellular Component: cytoplasm (GO:0005737);|Biological Process: metabolic process (GO:0008152);|Molecular Function: formate C-acetyltransferase activity (GO:0008861);	ron:TE10_10970	K00656	E2.3.1.54, pflD	formate C-acetyltransferase [EC:2.3.1.54]	ko00620,ko00640,ko00650	Pyruvate metabolism|Propanoate metabolism|Butanoate metabolism	pflD	COG1882	Pyruvate-formate lyase	[C]
gene3548 3755859 3754093 k141_433664_length_8848_cov_93.5001_9 8848 7082	WP_095095657.1	MULTISPECIES: formate C-acetyltransferase [Enterobacteriaceae]	P09373.2	RecName: Full=Formate acetyltransferase 1; AltName: Full=Pyruvate formate-lyase 1	Cellular Component: cytosol (GO:0005829);|Biological Process: glucose metabolic process (GO:0006006);|Biological Process: threonine catabolic process (GO:0006567);|Molecular Function: formate C-acetyltransferase activity (GO:0008861);|Cellular Component: membrane (GO:0016020);	ron:TE10_10385	K00656	E2.3.1.54, pflD	formate C-acetyltransferase [EC:2.3.1.54]	ko00620,ko00640,ko00650	Pyruvate metabolism|Propanoate metabolism|Butanoate metabolism	STM0973	COG1882	Pyruvate-formate lyase	[C]
MG bin.1
gene0964 1001970 999535 k141_521092_length_20073_cov_9.0000_6 8592 6157	WP_095097999.1	MULTISPECIES: formate C-acetyltransferase/glycerol dehydratase family glycyl radical enzyme [Enterobacteriaceae]	P75793.1	RecName: Full=Putative formate acetyltransferase 3; AltName: Full=Pyruvate formate-lyase 3	Cellular Component: cytosol (GO:0005829);|Biological Process: carbohydrate metabolic process (GO:0005975);|Molecular Function: formate C-acetyltransferase activity (GO:0008861);	ron:TE10_10005	K00656	E2.3.1.54, pflD	formate C-acetyltransferase [EC:2.3.1.54]	ko00620,ko00640,ko00650	Pyruvate metabolism|Propanoate metabolism|Butanoate metabolism	ybiW	COG1882	Pyruvate-formate lyase	[C]
gene1844 1898809 1896512 k141_42113_length_15039_cov_15.6893_5 4784 2487	WP_159236484.1	MULTISPECIES: formate C-acetyltransferase [unclassified Raoultella]	P32674.1	RecName: Full=Formate acetyltransferase 2; AltName: Full=Pyruvate formate-lyase 2	Cellular Component: cytoplasm (GO:0005737);|Biological Process: metabolic process (GO:0008152);|Molecular Function: formate C-acetyltransferase activity (GO:0008861);	ron:TE10_10970	K00656	E2.3.1.54, pflD	formate C-acetyltransferase [EC:2.3.1.54]	ko00620,ko00640,ko00650	Pyruvate metabolism|Propanoate metabolism|Butanoate metabolism	pflD	COG1882	Pyruvate-formate lyase	[C]
gene4545 4521648 4519366 k141_589993_length_5821_cov_15.0000_5 4881 2599	WP_095095657.1	MULTISPECIES: formate C-acetyltransferase [Enterobacteriaceae]	P09373.2	RecName: Full=Formate acetyltransferase 1; AltName: Full=Pyruvate formate-lyase 1	Cellular Component: cytosol (GO:0005829);|Biological Process: glucose metabolic process (GO:0006006);|Biological Process: threonine catabolic process (GO:0006567);|Molecular Function: formate C-acetyltransferase activity (GO:0008861);|Cellular Component: membrane (GO:0016020);	ron:TE10_10385	K00656	E2.3.1.54, pflD	formate C-acetyltransferase [EC:2.3.1.54]	ko00620,ko00640,ko00650	Pyruvate metabolism|Propanoate metabolism|Butanoate metabolism	STM0973	COG1882	Pyruvate-formate lyase	[C]
PHG bin.2
gene0602 698963 701191 k141_313111_length_415938_cov_34.1247_5 10833 13061	WP_165043666.1	formate C-acetyltransferase [Dysgonomonas sp. ZJ709]	Q6GCQ0.1	RecName: Full=Formate acetyltransferase; AltName: Full=Pyruvate formate-lyase	Cellular Component: cytoplasm (GO:0005737);|Biological Process: glucose metabolic process (GO:0006006);|Molecular Function: formate C-acetyltransferase activity (GO:0008861);	str:Sterm_2718	K00656	E2.3.1.54, pflD	formate C-acetyltransferase [EC:2.3.1.54]	ko00620,ko00640,ko00650	Pyruvate metabolism|Propanoate metabolism|Butanoate metabolism	FN0262	COG1882	Pyruvate-formate lyase	[C]
PHG bin.3
gene4109 4207117 4209399 k141_593433_length_4470_cov_11.8526_3 1838 4120	WP_109911031.1	MULTISPECIES: formate C-acetyltransferase [Providencia]	P09373.2	RecName: Full=Formate acetyltransferase 1; AltName: Full=Pyruvate formate-lyase 1	Cellular Component: cytosol (GO:0005829);|Biological Process: glucose metabolic process (GO:0006006);|Biological Process: threonine catabolic process (GO:0006567);|Molecular Function: formate C-acetyltransferase activity (GO:0008861);|Cellular Component: membrane (GO:0016020);	psi:S70_16590	K00656	E2.3.1.54, pflD	formate C-acetyltransferase [EC:2.3.1.54]	ko00620,ko00640,ko00650	Pyruvate metabolism|Propanoate metabolism|Butanoate metabolism	pflB	COG1882	Pyruvate-formate lyase	[C]
PHG bin.4
gene1881 1937752 1938627 k141_621073_length_8517_cov_494.3155_7 7640 8515	WP_095097999.1	MULTISPECIES: formate C-acetyltransferase/glycerol dehydratase family glycyl radical enzyme [Enterobacteriaceae]	P75793.1	RecName: Full=Putative formate acetyltransferase 3; AltName: Full=Pyruvate formate-lyase 3	Cellular Component: cytosol (GO:0005829);|Biological Process: carbohydrate metabolic process (GO:0005975);|Molecular Function: formate C-acetyltransferase activity (GO:0008861);	ron:TE10_10005	K00656	E2.3.1.54, pflD	formate C-acetyltransferase [EC:2.3.1.54]	ko00620,ko00640,ko00650	Pyruvate metabolism|Propanoate metabolism|Butanoate metabolism	STM0843	COG1882	Pyruvate-formate lyase	[C]
gene2098 2151417 2153714 k141_139219_length_7611_cov_69.9186_5 4741 7038	WP_159236484.1	MULTISPECIES: formate C-acetyltransferase [unclassified Raoultella]	P32674.1	RecName: Full=Formate acetyltransferase 2; AltName: Full=Pyruvate formate-lyase 2	Cellular Component: cytoplasm (GO:0005737);|Biological Process: metabolic process (GO:0008152);|Molecular Function: formate C-acetyltransferase activity (GO:0008861);	ron:TE10_10970	K00656	E2.3.1.54, pflD	formate C-acetyltransferase [EC:2.3.1.54]	ko00620,ko00640,ko00650	Pyruvate metabolism|Propanoate metabolism|Butanoate metabolism	pflD	COG1882	Pyruvate-formate lyase	[C]
gene4204 4137648 4139570 k141_83288_length_2956_cov_276.4757 1 1923	WP_095097999.1	MULTISPECIES: formate C-acetyltransferase/glycerol dehydratase family glycyl radical enzyme [Enterobacteriaceae]	P75793.1	RecName: Full=Putative formate acetyltransferase 3; AltName: Full=Pyruvate formate-lyase 3	Cellular Component: cytosol (GO:0005829);|Biological Process: carbohydrate metabolic process (GO:0005975);|Molecular Function: formate C-acetyltransferase activity (GO:0008861);	ron:TE10_10005	K00656	E2.3.1.54, pflD	formate C-acetyltransferase [EC:2.3.1.54]	ko00620,ko00640,ko00650	Pyruvate metabolism|Propanoate metabolism|Butanoate metabolism	ybiW	COG1882	Pyruvate-formate lyase	[C]
PHG bin.6
gene4354 3992729 3994375 k141_53320_length_4582_cov_14.6438_4 2936 4582	WP_009653794.1	MULTISPECIES: formate C-acetyltransferase/glycerol dehydratase family glycyl radical enzyme [Klebsiella]	P75793.1	RecName: Full=Putative formate acetyltransferase 3; AltName: Full=Pyruvate formate-lyase 3	Cellular Component: cytosol (GO:0005829);|Biological Process: carbohydrate metabolic process (GO:0005975);|Molecular Function: formate C-acetyltransferase activity (GO:0008861);	koe:A225_1876	K00656	E2.3.1.54, pflD	formate C-acetyltransferase [EC:2.3.1.54]	ko00620,ko00640,ko00650	Pyruvate metabolism|Propanoate metabolism|Butanoate metabolism	Z1046m	COG1882	Pyruvate-formate lyase	[C]
PHG bin.9
gene0677 788310 790598 k141_487240_length_49988_cov_36.9890_40 43462 45750	WP_067624215.1	formate C-acetyltransferase [Enterococcus pseudoavium]	Q6GCQ0.1	RecName: Full=Formate acetyltransferase; AltName: Full=Pyruvate formate-lyase	Cellular Component: cytoplasm (GO:0005737);|Biological Process: glucose metabolic process (GO:0006006);|Molecular Function: formate C-acetyltransferase activity (GO:0008861);	bprl:CL2_09780	K00656	E2.3.1.54, pflD	formate C-acetyltransferase [EC:2.3.1.54]	ko00620,ko00640,ko00650	Pyruvate metabolism|Propanoate metabolism|Butanoate metabolism	lin1443	COG1882	Pyruvate-formate lyase	[C]
Lactate dehydrogenase
AHG_bin.1
gene4548 4874481 4875425 k141_10482_length_9137_cov_55.8838_3 1225 2169	WP_095103404.1	MULTISPECIES: L-lactate dehydrogenase [Enterobacteriaceae]	Q71ZD6.1	RecName: Full=L-lactate dehydrogenase 2; Short=L-LDH 2	Molecular Function: L-lactate dehydrogenase activity (GO:0004459);|Cellular Component: cytoplasm (GO:0005737);|Biological Process: carbohydrate metabolic process (GO:0005975);|Biological Process: L(+)-lactate biosynthetic process from pyruvate (GO:0019246);	koe:A225_3114	K00016	LDH, ldh	L-lactate dehydrogenase [EC:1.1.1.27]	ko00010,ko00270,ko00620,ko00640,ko04066,ko04922,ko05230	Glycolysis / Gluconeogenesis|Cysteine and methionine metabolism|Pyruvate metabolism|Propanoate metabolism|HIF-1 signaling pathway|Glucagon signaling pathway|Central carbon metabolism in cancer	lin1569	COG0039	Malate/lactate dehydrogenases	[C]
AHG bin.5
gene0553 597422 598411 k141_411592_length_21741_cov_12.0000_8 8460 9449	WP_054117030.1	L-lactate dehydrogenase [Enterococcus sp. RIT-PI-f]	Q839C1.1	RecName: Full=L-lactate dehydrogenase 1; Short=L-LDH 1	Molecular Function: L-lactate dehydrogenase activity (GO:0004459);|Cellular Component: cytoplasm (GO:0005737);|Biological Process: carbohydrate metabolic process (GO:0005975);|Biological Process: carboxylic acid metabolic process (GO:0019752);	ecas:ECBG_03156	K00016	LDH, ldh	L-lactate dehydrogenase [EC:1.1.1.27]	ko00010,ko00270,ko00620,ko00640,ko04066,ko04922,ko05230	Glycolysis / Gluconeogenesis|Cysteine and methionine metabolism|Pyruvate metabolism|Propanoate metabolism|HIF-1 signaling pathway|Glucagon signaling pathway|Central carbon metabolism in cancer	SPy1151	COG0039	Malate/lactate dehydrogenases	[C]
gene3163 3249329 3248394 k141_440488_length_3578_cov_14.6023_4 3397 2462	WP_137636946.1	L-lactate dehydrogenase [Lactobacillus sp. 735-2]	P14295.3	RecName: Full=L-2-hydroxyisocaproate dehydrogenase; Short=L-HicDH	Molecular Function: L-lactate dehydrogenase activity (GO:0004459);|Biological Process: carbohydrate metabolic process (GO:0005975);|Biological Process: carboxylic acid metabolic process (GO:0019752);	lho:LOOC260_116780	K00016	LDH, ldh	L-lactate dehydrogenase [EC:1.1.1.27]	ko00010,ko00270,ko00620,ko00640,ko04066,ko04922,ko05230	Glycolysis / Gluconeogenesis|Cysteine and methionine metabolism|Pyruvate metabolism|Propanoate metabolism|HIF-1 signaling pathway|Glucagon signaling pathway|Central carbon metabolism in cancer	lin1775	COG0039	Malate/lactate dehydrogenases	[C]
FG bin.1
gene3487 3693107 3693412 k141_240253_length_9107_cov_65.3698 2 307	WP_133599697.1	L-lactate dehydrogenase [Raoultella sp. BIGb0149]	Q92BI0.1	RecName: Full=L-lactate dehydrogenase 2; Short=L-LDH 2	Molecular Function: L-lactate dehydrogenase activity (GO:0004459);|Cellular Component: cytoplasm (GO:0005737);|Biological Process: carbohydrate metabolic process (GO:0005975);|Biological Process: carboxylic acid metabolic process (GO:0019752);	koy:J415_16325	K00016	LDH, ldh	L-lactate dehydrogenase [EC:1.1.1.27]	ko00010,ko00270,ko00620,ko00640,ko04066,ko04922,ko05230	Glycolysis / Gluconeogenesis|Cysteine and methionine metabolism|Pyruvate metabolism|Propanoate metabolism|HIF-1 signaling pathway|Glucagon signaling pathway|Central carbon metabolism in cancer	lin1569	COG0039	Malate/lactate dehydrogenases	[C]
MG bin.1
gene3751 3748286 3747507 k141_430028_length_8157_cov_9.0000_12 8157 7378	WP_095103404.1	MULTISPECIES: L-lactate dehydrogenase [Enterobacteriaceae]	Q71ZD6.1	RecName: Full=L-lactate dehydrogenase 2; Short=L-LDH 2	Molecular Function: L-lactate dehydrogenase activity (GO:0004459);|Cellular Component: cytoplasm (GO:0005737);|Biological Process: carbohydrate metabolic process (GO:0005975);|Biological Process: L(+)-lactate biosynthetic process from pyruvate (GO:0019246);	koe:A225_3114	K00016	LDH, ldh	L-lactate dehydrogenase [EC:1.1.1.27]	ko00010,ko00270,ko00620,ko00640,ko04066,ko04922,ko05230	Glycolysis / Gluconeogenesis|Cysteine and methionine metabolism|Pyruvate metabolism|Propanoate metabolism|HIF-1 signaling pathway|Glucagon signaling pathway|Central carbon metabolism in cancer	lin1569	COG0039	Malate/lactate dehydrogenases	[C]
PHG bin.4
gene1426 1458800 1457856 k141_319249_length_10673_cov_79.6929_12 8364 7420	WP_095103404.1	MULTISPECIES: L-lactate dehydrogenase [Enterobacteriaceae]	Q8Y6Z6.1	RecName: Full=L-lactate dehydrogenase 2; Short=L-LDH 2	Molecular Function: L-lactate dehydrogenase activity (GO:0004459);|Cellular Component: cytoplasm (GO:0005737);|Biological Process: carbohydrate metabolic process (GO:0005975);|Biological Process: carboxylic acid metabolic process (GO:0019752);	koe:A225_3114	K00016	LDH, ldh	L-lactate dehydrogenase [EC:1.1.1.27]	ko00010,ko00270,ko00620,ko00640,ko04066,ko04922,ko05230	Glycolysis / Gluconeogenesis|Cysteine and methionine metabolism|Pyruvate metabolism|Propanoate metabolism|HIF-1 signaling pathway|Glucagon signaling pathway|Central carbon metabolism in cancer	lin1569	COG0039	Malate/lactate dehydrogenases	[C]
gene4810 4670285 4671373 k141_620864_length_1569_cov_54.0000 3 1091	NP_001129541.2	L-lactate dehydrogenase A chain isoform 2 [Mus musculus]	P06151.3	RecName: Full=L-lactate dehydrogenase A chain; Short=LDH-A; AltName: Full=LDH muscle subunit; Short=LDH-M	Molecular Function: lactate dehydrogenase activity (GO:0004457);|Molecular Function: L-lactate dehydrogenase activity (GO:0004459);|Cellular Component: mitochondrion (GO:0005739);|Cellular Component: cytosol (GO:0005829);|Biological Process: lactate biosynthetic process from pyruvate (GO:0019244);|Biological Process: glucose catabolic process to lactate via pyruvate (GO:0019661);|Biological Proce…	mmu:16828	K00016	LDH, ldh	L-lactate dehydrogenase [EC:1.1.1.27]	ko00010,ko00270,ko00620,ko00640,ko04066,ko04922,ko05230	Glycolysis / Gluconeogenesis|Cysteine and methionine metabolism|Pyruvate metabolism|Propanoate metabolism|HIF-1 signaling pathway|Glucagon signaling pathway|Central carbon metabolism in cancer	CAC0267	COG0039	Malate/lactate dehydrogenases	[C]
PHG bin.6
gene4320 3962052 3960988 k141_454677_length_4631_cov_9.0000_3 4584 3520	WP_121554496.1	Ldh family oxidoreductase [Gibbsiella quercinecans]	Q07251.1	RecName: Full=L-lactate dehydrogenase	Molecular Function: L-lactate dehydrogenase activity (GO:0004459);|Cellular Component: cytoplasm (GO:0005737);	ecv:APECO1_2404	K00016	LDH, ldh	L-lactate dehydrogenase [EC:1.1.1.27]	ko00010,ko00270,ko00620,ko00640,ko04066,ko04922,ko05230	Glycolysis / Gluconeogenesis|Cysteine and methionine metabolism|Pyruvate metabolism|Propanoate metabolism|HIF-1 signaling pathway|Glucagon signaling pathway|Central carbon metabolism in cancer	ZybiC	COG2055	Malate/L-lactate dehydrogenases	[C]
gene4392 4024162 4023218 k141_60076_length_4529_cov_11.0000_3 2477 1533	WP_112214264.1	L-lactate dehydrogenase [Klebsiella huaxiensis]	Q92BI0.1	RecName: Full=L-lactate dehydrogenase 2; Short=L-LDH 2	Molecular Function: L-lactate dehydrogenase activity (GO:0004459);|Cellular Component: cytoplasm (GO:0005737);|Biological Process: carbohydrate metabolic process (GO:0005975);|Biological Process: carboxylic acid metabolic process (GO:0019752);	koe:A225_3114	K00016	LDH, ldh	L-lactate dehydrogenase [EC:1.1.1.27]	ko00010,ko00270,ko00620,ko00640,ko04066,ko04922,ko05230	Glycolysis / Gluconeogenesis|Cysteine and methionine metabolism|Pyruvate metabolism|Propanoate metabolism|HIF-1 signaling pathway|Glucagon signaling pathway|Central carbon metabolism in cancer	lin1569	COG0039	Malate/lactate dehydrogenases	[C]
gene5432 4938206 4937142 k141_640029_length_3330_cov_17.4901_3 2452 1388	WP_058910880.1	Ldh family oxidoreductase [[Erwinia] teleogrylli]	Q07251.1	RecName: Full=L-lactate dehydrogenase	Molecular Function: L-lactate dehydrogenase activity (GO:0004459);|Cellular Component: cytoplasm (GO:0005737);	ecoi:ECOPMV1_04503	K00016	LDH, ldh	L-lactate dehydrogenase [EC:1.1.1.27]	ko00010,ko00270,ko00620,ko00640,ko04066,ko04922,ko05230	Glycolysis / Gluconeogenesis|Cysteine and methionine metabolism|Pyruvate metabolism|Propanoate metabolism|HIF-1 signaling pathway|Glucagon signaling pathway|Central carbon metabolism in cancer	ybiC	COG2055	Malate/L-lactate dehydrogenases	[C]
PHG bin.9
gene0201 239698 240633 k141_703374_length_90693_cov_48.4279_34 45322 46257	WP_137636946.1	L-lactate dehydrogenase [Lactobacillus sp. 735-2]	P14295.3	RecName: Full=L-2-hydroxyisocaproate dehydrogenase; Short=L-HicDH	Molecular Function: L-lactate dehydrogenase activity (GO:0004459);|Biological Process: carbohydrate metabolic process (GO:0005975);|Biological Process: carboxylic acid metabolic process (GO:0019752);	lho:LOOC260_116780	K00016	LDH, ldh	L-lactate dehydrogenase [EC:1.1.1.27]	ko00010,ko00270,ko00620,ko00640,ko04066,ko04922,ko05230	Glycolysis / Gluconeogenesis|Cysteine and methionine metabolism|Pyruvate metabolism|Propanoate metabolism|HIF-1 signaling pathway|Glucagon signaling pathway|Central carbon metabolism in cancer	lin1775	COG0039	Malate/lactate dehydrogenases	[C]
gene1384 1566047 1567036 k141_7665_length_29972_cov_39.3203_13 16600 17589	WP_054117030.1	L-lactate dehydrogenase [Enterococcus sp. RIT-PI-f]	Q839C1.1	RecName: Full=L-lactate dehydrogenase 1; Short=L-LDH 1	Molecular Function: L-lactate dehydrogenase activity (GO:0004459);|Cellular Component: cytoplasm (GO:0005737);|Biological Process: carbohydrate metabolic process (GO:0005975);|Biological Process: carboxylic acid metabolic process (GO:0019752);	ecas:ECBG_03156	K00016	LDH, ldh	L-lactate dehydrogenase [EC:1.1.1.27]	ko00010,ko00270,ko00620,ko00640,ko04066,ko04922,ko05230	Glycolysis / Gluconeogenesis|Cysteine and methionine metabolism|Pyruvate metabolism|Propanoate metabolism|HIF-1 signaling pathway|Glucagon signaling pathway|Central carbon metabolism in cancer	SPy1151	COG0039	Malate/lactate dehydrogenases	[C]
AHG_bin.1
gene2754 2976915 2977904 k141_50104_length_29369_cov_70.3197_12 14529 15518	WP_095097230.1	MULTISPECIES: 2-hydroxyacid dehydrogenase [Enterobacteriaceae]	P52643.1	RecName: Full=D-lactate dehydrogenase; Short=D-LDH; AltName: Full=Fermentative lactate dehydrogenase	Cellular Component: cytosol (GO:0005829);|Molecular Function: D-lactate dehydrogenase activity (GO:0008720);|Biological Process: response to heat (GO:0009408);|Biological Process: mixed acid fermentation (GO:0019664);|Molecular Function: NADH binding (GO:0070404);	ron:TE10_12925	K03778	ldhA	D-lactate dehydrogenase [EC:1.1.1.28]	ko00620	Pyruvate metabolism	STM1647	COG1052	Lactate dehydrogenase and related dehydrogenases	[CHR]
AHG bin.4
gene2136 2304279 2303287 k141_78061_length_7970_cov_48.0644_4 5145 4153	WP_095848772.1	2-hydroxyacid dehydrogenase [Gibbsiella quercinecans]	P52643.1	RecName: Full=D-lactate dehydrogenase; Short=D-LDH; AltName: Full=Fermentative lactate dehydrogenase	Cellular Component: cytosol (GO:0005829);|Molecular Function: D-lactate dehydrogenase activity (GO:0008720);|Biological Process: response to heat (GO:0009408);|Biological Process: mixed acid fermentation (GO:0019664);|Molecular Function: NADH binding (GO:0070404);	srr:SerAS9_2595	K03778	ldhA	D-lactate dehydrogenase [EC:1.1.1.28]	ko00620	Pyruvate metabolism	YPO2329	COG1052	Lactate dehydrogenase and related dehydrogenases	[CHR]
AHG bin.5
gene2681 2809721 2810692 k141_288556_length_5466_cov_9.0000_3 1801 2772	WP_087033467.1	lactate dehydrogenase [Trichococcus palustris]	G9EZR6.1	RecName: Full=Phenyllactate dehydrogenase	Biological Process: L-phenylalanine catabolic process (GO:0006559);|Molecular Function: oxidoreductase activity, acting on the CH-OH group of donors, NAD or NADP as acceptor (GO:0016616);|Molecular Function: NAD binding (GO:0051287);|Molecular Function: phenyllactate dehydrogenase activity (GO:0097256);	lme:LEUM_0373	K03778	ldhA	D-lactate dehydrogenase [EC:1.1.1.28]	ko00620	Pyruvate metabolism	SA2346	COG1052	Lactate dehydrogenase and related dehydrogenases	[CHR]
FG bin.1
gene4357 4540265 4540855 k141_327276_length_5079_cov_67.2211_6 4487 5077	WP_095097230.1	MULTISPECIES: 2-hydroxyacid dehydrogenase [Enterobacteriaceae]	P52643.1	RecName: Full=D-lactate dehydrogenase; Short=D-LDH; AltName: Full=Fermentative lactate dehydrogenase	Cellular Component: cytosol (GO:0005829);|Molecular Function: D-lactate dehydrogenase activity (GO:0008720);|Biological Process: response to heat (GO:0009408);|Biological Process: mixed acid fermentation (GO:0019664);|Molecular Function: NADH binding (GO:0070404);	ron:TE10_12925	K03778	ldhA	D-lactate dehydrogenase [EC:1.1.1.28]	ko00620	Pyruvate metabolism	STM1647	COG1052	Lactate dehydrogenase and related dehydrogenases	[CHR]
MG bin.1
gene5305 5214792 5213803 k141_573162_length_3907_cov_7.0000_2 1660 671	WP_095097230.1	MULTISPECIES: 2-hydroxyacid dehydrogenase [Enterobacteriaceae]	P52643.1	RecName: Full=D-lactate dehydrogenase; Short=D-LDH; AltName: Full=Fermentative lactate dehydrogenase	Cellular Component: cytosol (GO:0005829);|Molecular Function: D-lactate dehydrogenase activity (GO:0008720);|Biological Process: response to heat (GO:0009408);|Biological Process: mixed acid fermentation (GO:0019664);|Molecular Function: NADH binding (GO:0070404);	ron:TE10_12925	K03778	ldhA	D-lactate dehydrogenase [EC:1.1.1.28]	ko00620	Pyruvate metabolism	STM1647	COG1052	Lactate dehydrogenase and related dehydrogenases	[CHR]
PHG bin.2
gene0240 262006 263010 k141_744054_length_688130_cov_29.4006_240 262006 263010	WP_165020541.1	MULTISPECIES: 2-hydroxyacid dehydrogenase [unclassified Dysgonomonas]	P44501.1	RecName: Full=2-hydroxyacid dehydrogenase homolog	Molecular Function: oxidoreductase activity, acting on the CH-OH group of donors, NAD or NADP as acceptor (GO:0016616);|Molecular Function: NAD binding (GO:0051287);	bdh:GV66_13030	K03778	ldhA	D-lactate dehydrogenase [EC:1.1.1.28]	ko00620	Pyruvate metabolism	FN0511	COG1052	Lactate dehydrogenase and related dehydrogenases	[CHR]
PHG bin.3
gene3429 3591857 3590856 k141_42730_length_5793_cov_8.0000_3 2417 1416	SUC31478.1	D-lactate dehydrogenase [Providencia rettgeri]	P52643.1	RecName: Full=D-lactate dehydrogenase; Short=D-LDH; AltName: Full=Fermentative lactate dehydrogenase	Cellular Component: cytosol (GO:0005829);|Molecular Function: D-lactate dehydrogenase activity (GO:0008720);|Biological Process: response to heat (GO:0009408);|Biological Process: mixed acid fermentation (GO:0019664);|Molecular Function: NADH binding (GO:0070404);	psx:DR96_2998	K03778	ldhA	D-lactate dehydrogenase [EC:1.1.1.28]	ko00620	Pyruvate metabolism	YPO2329	COG1052	Lactate dehydrogenase and related dehydrogenases	[CHR]
PHG bin.4
gene2801 2835391 2835062 k141_167936_length_5979_cov_78.0759 332 3	WP_159872972.1	MULTISPECIES: 2-hydroxyacid dehydrogenase [unclassified Raoultella]	P52643.1	RecName: Full=D-lactate dehydrogenase; Short=D-LDH; AltName: Full=Fermentative lactate dehydrogenase	Cellular Component: cytosol (GO:0005829);|Molecular Function: D-lactate dehydrogenase activity (GO:0008720);|Biological Process: response to heat (GO:0009408);|Biological Process: mixed acid fermentation (GO:0019664);|Molecular Function: NADH binding (GO:0070404);	ron:TE10_12925	K03778	ldhA	D-lactate dehydrogenase [EC:1.1.1.28]	ko00620	Pyruvate metabolism	STM1647	COG1052	Lactate dehydrogenase and related dehydrogenases	[CHR]
gene4531 4424670 4423873 k141_186381_length_2212_cov_104.7958_3 2211 1414	WP_095097230.1	MULTISPECIES: 2-hydroxyacid dehydrogenase [Enterobacteriaceae]	P52643.1	RecName: Full=D-lactate dehydrogenase; Short=D-LDH; AltName: Full=Fermentative lactate dehydrogenase	Cellular Component: cytosol (GO:0005829);|Molecular Function: D-lactate dehydrogenase activity (GO:0008720);|Biological Process: response to heat (GO:0009408);|Biological Process: mixed acid fermentation (GO:0019664);|Molecular Function: NADH binding (GO:0070404);	kom:HR38_17505	K03778	ldhA	D-lactate dehydrogenase [EC:1.1.1.28]	ko00620	Pyruvate metabolism	STM1647	COG1052	Lactate dehydrogenase and related dehydrogenases	[CHR]
PHG bin.6
gene4722 4323546 4324196 k141_394153_length_4045_cov_11.0000_4 3394 4044	WP_139538051.1	2-hydroxyacid dehydrogenase [Klebsiella michiganensis]	P52643.1	RecName: Full=D-lactate dehydrogenase; Short=D-LDH; AltName: Full=Fermentative lactate dehydrogenase	Cellular Component: cytosol (GO:0005829);|Molecular Function: D-lactate dehydrogenase activity (GO:0008720);|Biological Process: response to heat (GO:0009408);|Biological Process: mixed acid fermentation (GO:0019664);|Molecular Function: NADH binding (GO:0070404);	kok:KONIH1_13245	K03778	ldhA	D-lactate dehydrogenase [EC:1.1.1.28]	ko00620	Pyruvate metabolism	STM1647	COG1052	Lactate dehydrogenase and related dehydrogenases	[CHR]
gene5401 4915718 4915581 k141_515011_length_3349_cov_15.0000_4 3349 3212	MXG37124.1	2-hydroxyacid dehydrogenase [Escherichia coli]	P52643.1	RecName: Full=D-lactate dehydrogenase; Short=D-LDH; AltName: Full=Fermentative lactate dehydrogenase	Cellular Component: cytosol (GO:0005829);|Molecular Function: D-lactate dehydrogenase activity (GO:0008720);|Biological Process: response to heat (GO:0009408);|Biological Process: mixed acid fermentation (GO:0019664);|Molecular Function: NADH binding (GO:0070404);	ror:RORB6_07620	K03778	ldhA	D-lactate dehydrogenase [EC:1.1.1.28]	ko00620	Pyruvate metabolism	STM1647	COG1052	Lactate dehydrogenase and related dehydrogenases	[CHR]
PHG bin.9
gene0841 957723 958694 k141_443839_length_44579_cov_37.2390_26 22683 23654	WP_087033467.1	lactate dehydrogenase [Trichococcus palustris]	G9EZR6.1	RecName: Full=Phenyllactate dehydrogenase	Biological Process: L-phenylalanine catabolic process (GO:0006559);|Molecular Function: oxidoreductase activity, acting on the CH-OH group of donors, NAD or NADP as acceptor (GO:0016616);|Molecular Function: NAD binding (GO:0051287);|Molecular Function: phenyllactate dehydrogenase activity (GO:0097256);	lme:LEUM_0373	K03778	ldhA	D-lactate dehydrogenase [EC:1.1.1.28]	ko00620	Pyruvate metabolism	SA2346	COG1052	Lactate dehydrogenase and related dehydrogenases	[CHR]
AHG_bin.1
gene4924 5264755 5266230 k141_475469_length_5480_cov_59.1852_3 1487 2962	WP_095105134.1	MULTISPECIES: ketol-acid reductoisomerase [Enterobacteriaceae]	A6TGG1.1	RecName: Full=Ketol-acid reductoisomerase (NADP(+)); Short=KARI; AltName: Full=Acetohydroxy-acid isomeroreductase; Short=AHIR; AltName: Full=Alpha-keto-beta-hydroxylacyl reductoisomerase; AltName: Full=Ketol-acid reductoisomerase type 2; AltName: Full=Ketol-acid reductoisomerase type II	Molecular Function: nucleotide binding (GO:0000166);|Molecular Function: ketol-acid reductoisomerase activity (GO:0004455);|Biological Process: isoleucine biosynthetic process (GO:0009097);|Biological Process: valine biosynthetic process (GO:0009099);|Molecular Function: metal ion binding (GO:0046872);	ron:TE10_02990	K00053	ilvC	ketol-acid reductoisomerase [EC:1.1.1.86]	ko00290,ko00770	Valine, leucine and isoleucine biosynthesis|Pantothenate and CoA biosynthesis	STM3909	COG0059	Ketol-acid reductoisomerase	[EH]
AHG bin.4
gene0907 1010043 1008568 k141_494478_length_15871_cov_43.9561_10 9947 8472	WP_095846662.1	ketol-acid reductoisomerase [Gibbsiella quercinecans]	A8GL54.1	RecName: Full=Ketol-acid reductoisomerase (NADP(+)); Short=KARI; AltName: Full=Acetohydroxy-acid isomeroreductase; Short=AHIR; AltName: Full=Alpha-keto-beta-hydroxylacyl reductoisomerase; AltName: Full=Ketol-acid reductoisomerase type 2; AltName: Full=Ketol-acid reductoisomerase type II	Molecular Function: nucleotide binding (GO:0000166);|Molecular Function: ketol-acid reductoisomerase activity (GO:0004455);|Biological Process: isoleucine biosynthetic process (GO:0009097);|Biological Process: valine biosynthetic process (GO:0009099);|Molecular Function: metal ion binding (GO:0046872);	smaf:D781_4410	K00053	ilvC	ketol-acid reductoisomerase [EC:1.1.1.86]	ko00290,ko00770	Valine, leucine and isoleucine biosynthesis|Pantothenate and CoA biosynthesis	YPO3888	COG0059	Ketol-acid reductoisomerase	[EH]
AHG bin.5
gene1765 1887715 1886861 k141_451322_length_9492_cov_11.0000_10 9490 8636	WP_081118784.1	ketol-acid reductoisomerase [Enterococcus casseliflavus]	A0AK91.1	RecName: Full=Ketol-acid reductoisomerase (NADP(+)); Short=KARI; AltName: Full=Acetohydroxy-acid isomeroreductase; Short=AHIR; AltName: Full=Alpha-keto-beta-hydroxylacyl reductoisomerase; AltName: Full=Ketol-acid reductoisomerase type 1; AltName: Full=Ketol-acid reductoisomerase type I	Molecular Function: ketol-acid reductoisomerase activity (GO:0004455);|Biological Process: isoleucine biosynthetic process (GO:0009097);|Biological Process: valine biosynthetic process (GO:0009099);|Molecular Function: metal ion binding (GO:0046872);|Molecular Function: NADP binding (GO:0050661);	ecas:ECBG_01828	K00053	ilvC	ketol-acid reductoisomerase [EC:1.1.1.86]	ko00290,ko00770	Valine, leucine and isoleucine biosynthesis|Pantothenate and CoA biosynthesis	lin2093	COG0059	Ketol-acid reductoisomerase	[EH]
FG bin.1
gene4677 4837029 4835554 k141_564951_length_3413_cov_52.3774_3 2500 1025	WP_095105134.1	MULTISPECIES: ketol-acid reductoisomerase [Enterobacteriaceae]	A6TGG1.1	RecName: Full=Ketol-acid reductoisomerase (NADP(+)); Short=KARI; AltName: Full=Acetohydroxy-acid isomeroreductase; Short=AHIR; AltName: Full=Alpha-keto-beta-hydroxylacyl reductoisomerase; AltName: Full=Ketol-acid reductoisomerase type 2; AltName: Full=Ketol-acid reductoisomerase type II	Molecular Function: nucleotide binding (GO:0000166);|Molecular Function: ketol-acid reductoisomerase activity (GO:0004455);|Biological Process: isoleucine biosynthetic process (GO:0009097);|Biological Process: valine biosynthetic process (GO:0009099);|Molecular Function: metal ion binding (GO:0046872);	ron:TE10_02990	K00053	ilvC	ketol-acid reductoisomerase [EC:1.1.1.86]	ko00290,ko00770	Valine, leucine and isoleucine biosynthesis|Pantothenate and CoA biosynthesis	STM3909	COG0059	Ketol-acid reductoisomerase	[EH]
MG bin.1
gene3253 3269918 3271393 k141_67956_length_9803_cov_12.0000_7 6515 7990	WP_095105134.1	MULTISPECIES: ketol-acid reductoisomerase [Enterobacteriaceae]	A6TGG1.1	RecName: Full=Ketol-acid reductoisomerase (NADP(+)); Short=KARI; AltName: Full=Acetohydroxy-acid isomeroreductase; Short=AHIR; AltName: Full=Alpha-keto-beta-hydroxylacyl reductoisomerase; AltName: Full=Ketol-acid reductoisomerase type 2; AltName: Full=Ketol-acid reductoisomerase type II	Molecular Function: nucleotide binding (GO:0000166);|Molecular Function: ketol-acid reductoisomerase activity (GO:0004455);|Biological Process: isoleucine biosynthetic process (GO:0009097);|Biological Process: valine biosynthetic process (GO:0009099);|Molecular Function: metal ion binding (GO:0046872);	ron:TE10_02990	K00053	ilvC	ketol-acid reductoisomerase [EC:1.1.1.86]	ko00290,ko00770	Valine, leucine and isoleucine biosynthesis|Pantothenate and CoA biosynthesis	STM3909	COG0059	Ketol-acid reductoisomerase	[EH]
PHG bin.2
gene2119 2432906 2431860 k141_483246_length_218684_cov_27.0668_102 96472 95426	WP_062183618.1	ketol-acid reductoisomerase [Dysgonomonas macrotermitis]	A8ZTR0.1	RecName: Full=Ketol-acid reductoisomerase (NAD(+)); Short=KARI; AltName: Full=Acetohydroxy-acid isomeroreductase; Short=AHIR; AltName: Full=Alpha-keto-beta-hydroxylacyl reductoisomerase	Molecular Function: ketol-acid reductoisomerase activity (GO:0004455);|Biological Process: isoleucine biosynthetic process (GO:0009097);|Biological Process: valine biosynthetic process (GO:0009099);|Molecular Function: isomerase activity (GO:0016853);|Molecular Function: metal ion binding (GO:0046872);	pbt:ING2E5B_0731	K00053	ilvC	ketol-acid reductoisomerase [EC:1.1.1.86]	ko00290,ko00770	Valine, leucine and isoleucine biosynthesis|Pantothenate and CoA biosynthesis	YLR355c	COG0059	Ketol-acid reductoisomerase	[EH]
PHG bin.3
gene2397 2528514 2527957 k141_632878_length_8749_cov_13.0000 560 3	WP_004907263.1	MULTISPECIES: ketol-acid reductoisomerase [Providencia]	Q66G37.1	RecName: Full=Ketol-acid reductoisomerase (NADP(+)); Short=KARI; AltName: Full=Acetohydroxy-acid isomeroreductase; Short=AHIR; AltName: Full=Alpha-keto-beta-hydroxylacyl reductoisomerase; AltName: Full=Ketol-acid reductoisomerase type 2; AltName: Full=Ketol-acid reductoisomerase type II	Molecular Function: nucleotide binding (GO:0000166);|Molecular Function: ketol-acid reductoisomerase activity (GO:0004455);|Biological Process: isoleucine biosynthetic process (GO:0009097);|Biological Process: valine biosynthetic process (GO:0009099);|Molecular Function: metal ion binding (GO:0046872);	psx:DR96_858	K00053	ilvC	ketol-acid reductoisomerase [EC:1.1.1.86]	ko00290,ko00770	Valine, leucine and isoleucine biosynthesis|Pantothenate and CoA biosynthesis	YPO3888	COG0059	Ketol-acid reductoisomerase	[EH]
gene4770 4804088 4803243 k141_49489_length_3379_cov_13.0000_3 3379 2534	WP_004907263.1	MULTISPECIES: ketol-acid reductoisomerase [Providencia]	B4F1U6.1	RecName: Full=Ketol-acid reductoisomerase (NADP(+)); Short=KARI; AltName: Full=Acetohydroxy-acid isomeroreductase; Short=AHIR; AltName: Full=Alpha-keto-beta-hydroxylacyl reductoisomerase; AltName: Full=Ketol-acid reductoisomerase type 2; AltName: Full=Ketol-acid reductoisomerase type II	Molecular Function: nucleotide binding (GO:0000166);|Molecular Function: ketol-acid reductoisomerase activity (GO:0004455);|Biological Process: isoleucine biosynthetic process (GO:0009097);|Biological Process: valine biosynthetic process (GO:0009099);|Molecular Function: metal ion binding (GO:0046872);	psx:DR96_858	K00053	ilvC	ketol-acid reductoisomerase [EC:1.1.1.86]	ko00290,ko00770	Valine, leucine and isoleucine biosynthesis|Pantothenate and CoA biosynthesis	ECs4708	COG0059	Ketol-acid reductoisomerase	[EH]
PHG bin.4
gene4288 4216646 4215171 k141_630430_length_2744_cov_150.0661_2 2296 821	WP_095105134.1	MULTISPECIES: ketol-acid reductoisomerase [Enterobacteriaceae]	A6TGG1.1	RecName: Full=Ketol-acid reductoisomerase (NADP(+)); Short=KARI; AltName: Full=Acetohydroxy-acid isomeroreductase; Short=AHIR; AltName: Full=Alpha-keto-beta-hydroxylacyl reductoisomerase; AltName: Full=Ketol-acid reductoisomerase type 2; AltName: Full=Ketol-acid reductoisomerase type II	Molecular Function: nucleotide binding (GO:0000166);|Molecular Function: ketol-acid reductoisomerase activity (GO:0004455);|Biological Process: isoleucine biosynthetic process (GO:0009097);|Biological Process: valine biosynthetic process (GO:0009099);|Molecular Function: metal ion binding (GO:0046872);	ron:TE10_02990	K00053	ilvC	ketol-acid reductoisomerase [EC:1.1.1.86]	ko00290,ko00770	Valine, leucine and isoleucine biosynthesis|Pantothenate and CoA biosynthesis	STM3909	COG0059	Ketol-acid reductoisomerase	[EH]
PHG bin.6
gene2093 1940576 1940067 k141_169143_length_8584_cov_20.0000_9 8584 8075	WP_151217281.1	ketol-acid reductoisomerase [Citrobacter freundii]	B5XYZ8.1	RecName: Full=Ketol-acid reductoisomerase (NADP(+)); Short=KARI; AltName: Full=Acetohydroxy-acid isomeroreductase; Short=AHIR; AltName: Full=Alpha-keto-beta-hydroxylacyl reductoisomerase; AltName: Full=Ketol-acid reductoisomerase type 2; AltName: Full=Ketol-acid reductoisomerase type II	Molecular Function: nucleotide binding (GO:0000166);|Molecular Function: ketol-acid reductoisomerase activity (GO:0004455);|Biological Process: isoleucine biosynthetic process (GO:0009097);|Biological Process: valine biosynthetic process (GO:0009099);|Molecular Function: metal ion binding (GO:0046872);	kom:HR38_29630	K00053	ilvC	ketol-acid reductoisomerase [EC:1.1.1.86]	ko00290,ko00770	Valine, leucine and isoleucine biosynthesis|Pantothenate and CoA biosynthesis	STM3909	COG0059	Ketol-acid reductoisomerase	[EH]
gene5931 5343687 5343139 k141_402924_length_2852_cov_30.0000 549 1	WP_126479476.1	ketol-acid reductoisomerase [Salmonella enterica]	Q8Z381.3	RecName: Full=Ketol-acid reductoisomerase (NADP(+)); Short=KARI; AltName: Full=Acetohydroxy-acid isomeroreductase; Short=AHIR; AltName: Full=Alpha-keto-beta-hydroxylacyl reductoisomerase; AltName: Full=Ketol-acid reductoisomerase type 2; AltName: Full=Ketol-acid reductoisomerase type II	Molecular Function: nucleotide binding (GO:0000166);|Molecular Function: ketol-acid reductoisomerase activity (GO:0004455);|Biological Process: isoleucine biosynthetic process (GO:0009097);|Biological Process: valine biosynthetic process (GO:0009099);|Molecular Function: metal ion binding (GO:0046872);	ror:RORB6_17990	K00053	ilvC	ketol-acid reductoisomerase [EC:1.1.1.86]	ko00290,ko00770	Valine, leucine and isoleucine biosynthesis|Pantothenate and CoA biosynthesis	STM3909	COG0059	Ketol-acid reductoisomerase	[EH]
PHG bin.9
gene2351 2610238 2611224 k141_108706_length_13239_cov_33.9937_4 5052 6038	WP_081118784.1	ketol-acid reductoisomerase [Enterococcus casseliflavus]	A0AK91.1	RecName: Full=Ketol-acid reductoisomerase (NADP(+)); Short=KARI; AltName: Full=Acetohydroxy-acid isomeroreductase; Short=AHIR; AltName: Full=Alpha-keto-beta-hydroxylacyl reductoisomerase; AltName: Full=Ketol-acid reductoisomerase type 1; AltName: Full=Ketol-acid reductoisomerase type I	Molecular Function: ketol-acid reductoisomerase activity (GO:0004455);|Biological Process: isoleucine biosynthetic process (GO:0009097);|Biological Process: valine biosynthetic process (GO:0009099);|Molecular Function: metal ion binding (GO:0046872);|Molecular Function: NADP binding (GO:0050661);	ecas:ECBG_01828	K00053	ilvC	ketol-acid reductoisomerase [EC:1.1.1.86]	ko00290,ko00770	Valine, leucine and isoleucine biosynthesis|Pantothenate and CoA biosynthesis	lin2093	COG0059	Ketol-acid reductoisomerase	[EH]
AHG_bin.1
gene0722 777869 776685 k141_493839_length_64794_cov_55.0123_13 11947 10763	WP_095102686.1	MULTISPECIES: FMN-dependent L-lactate dehydrogenase LldD [Enterobacteriaceae]	B5XMV0.1	RecName: Full=L-lactate dehydrogenase	Molecular Function: lactate dehydrogenase activity (GO:0004457);|Cellular Component: plasma membrane (GO:0005886);|Biological Process: lactate metabolic process (GO:0006089);|Molecular Function: FMN binding (GO:0010181);	ron:TE10_01445	K00101	lldD	L-lactate dehydrogenase (cytochrome) [EC:1.1.2.3]	ko00620	Pyruvate metabolism	STM3694	COG1304	L-lactate dehydrogenase (FMN-dependent) and related alpha-hydroxy acid dehydrogenases	[C]
AHG bin.4
gene2049 2210198 2211340 k141_267982_length_8247_cov_36.9375_2 708 1850	WP_095847394.1	FMN-dependent L-lactate dehydrogenase LldD [Gibbsiella quercinecans]	A8GIL1.1	RecName: Full=L-lactate dehydrogenase	Molecular Function: lactate dehydrogenase activity (GO:0004457);|Cellular Component: plasma membrane (GO:0005886);|Biological Process: lactate metabolic process (GO:0006089);|Molecular Function: FMN binding (GO:0010181);	smaf:D781_3619	K00101	lldD	L-lactate dehydrogenase (cytochrome) [EC:1.1.2.3]	ko00620	Pyruvate metabolism	YPO1569	COG1304	L-lactate dehydrogenase (FMN-dependent) and related alpha-hydroxy acid dehydrogenases	[C]
FG bin.1
gene2466 2639651 2639481 k141_106043_length_14666_cov_70.1429_16 14666 14496	WP_095102686.1	MULTISPECIES: FMN-dependent L-lactate dehydrogenase LldD [Enterobacteriaceae]	B5XMV0.1	RecName: Full=L-lactate dehydrogenase	Molecular Function: lactate dehydrogenase activity (GO:0004457);|Cellular Component: plasma membrane (GO:0005886);|Biological Process: lactate metabolic process (GO:0006089);|Molecular Function: FMN binding (GO:0010181);	ron:TE10_01445	K00101	lldD	L-lactate dehydrogenase (cytochrome) [EC:1.1.2.3]	ko00620	Pyruvate metabolism	ECs4483	COG1304	L-lactate dehydrogenase (FMN-dependent) and related alpha-hydroxy acid dehydrogenases	[C]
gene4771 4914598 4913444 k141_249884_length_2834_cov_69.9090 1155 1	WP_095102686.1	MULTISPECIES: FMN-dependent L-lactate dehydrogenase LldD [Enterobacteriaceae]	B5XMV0.1	RecName: Full=L-lactate dehydrogenase	Molecular Function: lactate dehydrogenase activity (GO:0004457);|Cellular Component: plasma membrane (GO:0005886);|Biological Process: lactate metabolic process (GO:0006089);|Molecular Function: FMN binding (GO:0010181);	ron:TE10_01445	K00101	lldD	L-lactate dehydrogenase (cytochrome) [EC:1.1.2.3]	ko00620	Pyruvate metabolism	STM3694	COG1304	L-lactate dehydrogenase (FMN-dependent) and related alpha-hydroxy acid dehydrogenases	[C]
MG bin.1
gene2393 2428430 2427246 k141_333838_length_12646_cov_14.0000_8 5834 4650	WP_095102686.1	MULTISPECIES: FMN-dependent L-lactate dehydrogenase LldD [Enterobacteriaceae]	B5XMV0.1	RecName: Full=L-lactate dehydrogenase	Molecular Function: lactate dehydrogenase activity (GO:0004457);|Cellular Component: plasma membrane (GO:0005886);|Biological Process: lactate metabolic process (GO:0006089);|Molecular Function: FMN binding (GO:0010181);	ron:TE10_01445	K00101	lldD	L-lactate dehydrogenase (cytochrome) [EC:1.1.2.3]	ko00620	Pyruvate metabolism	STM3694	COG1304	L-lactate dehydrogenase (FMN-dependent) and related alpha-hydroxy acid dehydrogenases	[C]
PHG bin.4
gene0198 192687 193871 k141_348837_length_24484_cov_101.8174_12 11173 12357	WP_095102686.1	MULTISPECIES: FMN-dependent L-lactate dehydrogenase LldD [Enterobacteriaceae]	B5XMV0.1	RecName: Full=L-lactate dehydrogenase	Molecular Function: lactate dehydrogenase activity (GO:0004457);|Cellular Component: plasma membrane (GO:0005886);|Biological Process: lactate metabolic process (GO:0006089);|Molecular Function: FMN binding (GO:0010181);	ron:TE10_01445	K00101	lldD	L-lactate dehydrogenase (cytochrome) [EC:1.1.2.3]	ko00620	Pyruvate metabolism	STM3694	COG1304	L-lactate dehydrogenase (FMN-dependent) and related alpha-hydroxy acid dehydrogenases	[C]
PHG bin.6
gene6185 5552306 5551236 k141_18845_length_2582_cov_22.0000_3 2582 1512	WP_112215940.1	MULTISPECIES: FMN-dependent L-lactate dehydrogenase LldD [Klebsiella]	A6TFK0.1	RecName: Full=L-lactate dehydrogenase	Molecular Function: lactate dehydrogenase activity (GO:0004457);|Cellular Component: plasma membrane (GO:0005886);|Biological Process: lactate metabolic process (GO:0006089);|Molecular Function: FMN binding (GO:0010181);	kok:KONIH1_28325	K00101	lldD	L-lactate dehydrogenase (cytochrome) [EC:1.1.2.3]	ko00620	Pyruvate metabolism	STM3694	COG1304	L-lactate dehydrogenase (FMN-dependent) and related alpha-hydroxy acid dehydrogenases	[C]
AHG_bin.1
gene1030 1107633 1109369 k141_473671_length_56391_cov_41.0319_40 37378 39114	WP_095100769.1	MULTISPECIES: D-lactate dehydrogenase [Enterobacteriaceae]	P06149.3	RecName: Full=D-lactate dehydrogenase; AltName: Full=Respiratory D-lactate dehydrogenase	Molecular Function: D-lactate dehydrogenase (cytochrome) activity (GO:0004458);|Cellular Component: plasma membrane (GO:0005886);|Cellular Component: integral component of plasma membrane (GO:0005887);|Molecular Function: electron transfer activity (GO:0009055);|Biological Process: aerobic respiration (GO:0009060);|Biological Process: anaerobic respiration (GO:0009061);|Molecular Function: oxidor…	ron:TE10_19665	K03777	dld	D-lactate dehydrogenase (quinone) [EC:1.1.5.12]	ko00620	Pyruvate metabolism	ECs3020	COG0277	FAD/FMN-containing dehydrogenases	[C]
AHG bin.4
gene0598 679277 677562 k141_157968_length_20693_cov_47.0163_4 3731 2016	WP_121553032.1	D-lactate dehydrogenase [Gibbsiella quercinecans]	P06149.3	RecName: Full=D-lactate dehydrogenase; AltName: Full=Respiratory D-lactate dehydrogenase	Molecular Function: D-lactate dehydrogenase (cytochrome) activity (GO:0004458);|Cellular Component: plasma membrane (GO:0005886);|Cellular Component: integral component of plasma membrane (GO:0005887);|Molecular Function: electron transfer activity (GO:0009055);|Biological Process: aerobic respiration (GO:0009060);|Biological Process: anaerobic respiration (GO:0009061);|Molecular Function: oxidor…	sry:M621_06960	K03777	dld	D-lactate dehydrogenase (quinone) [EC:1.1.5.12]	ko00620	Pyruvate metabolism	YPO1177	COG0277	FAD/FMN-containing dehydrogenases	[C]
FG bin.1
gene2411 2580201 2578465 k141_29442_length_14977_cov_61.6227_12 14593 12857	WP_095100769.1	MULTISPECIES: D-lactate dehydrogenase [Enterobacteriaceae]	P06149.3	RecName: Full=D-lactate dehydrogenase; AltName: Full=Respiratory D-lactate dehydrogenase	Molecular Function: D-lactate dehydrogenase (cytochrome) activity (GO:0004458);|Cellular Component: plasma membrane (GO:0005886);|Cellular Component: integral component of plasma membrane (GO:0005887);|Molecular Function: electron transfer activity (GO:0009055);|Biological Process: aerobic respiration (GO:0009060);|Biological Process: anaerobic respiration (GO:0009061);|Molecular Function: oxidor…	ron:TE10_19665	K03777	dld	D-lactate dehydrogenase (quinone) [EC:1.1.5.12]	ko00620	Pyruvate metabolism	Zdld	COG0277	FAD/FMN-containing dehydrogenases	[C]
MG bin.1
gene5218 5138491 5140227 k141_425081_length_4103_cov_8.0000_2 1606 3342	WP_095100769.1	MULTISPECIES: D-lactate dehydrogenase [Enterobacteriaceae]	P06149.3	RecName: Full=D-lactate dehydrogenase; AltName: Full=Respiratory D-lactate dehydrogenase	Molecular Function: D-lactate dehydrogenase (cytochrome) activity (GO:0004458);|Cellular Component: plasma membrane (GO:0005886);|Cellular Component: integral component of plasma membrane (GO:0005887);|Molecular Function: electron transfer activity (GO:0009055);|Biological Process: aerobic respiration (GO:0009060);|Biological Process: anaerobic respiration (GO:0009061);|Molecular Function: oxidor…	ron:TE10_19665	K03777	dld	D-lactate dehydrogenase (quinone) [EC:1.1.5.12]	ko00620	Pyruvate metabolism	Zdld	COG0277	FAD/FMN-containing dehydrogenases	[C]
PHG bin.3
gene2537 2666058 2667797 k141_674456_length_8285_cov_9.8922 393 2132	WP_117162368.1	D-lactate dehydrogenase [Providencia rettgeri]	P06149.3	RecName: Full=D-lactate dehydrogenase; AltName: Full=Respiratory D-lactate dehydrogenase	Molecular Function: D-lactate dehydrogenase (cytochrome) activity (GO:0004458);|Cellular Component: plasma membrane (GO:0005886);|Cellular Component: integral component of plasma membrane (GO:0005887);|Molecular Function: electron transfer activity (GO:0009055);|Biological Process: aerobic respiration (GO:0009060);|Biological Process: anaerobic respiration (GO:0009061);|Molecular Function: oxidor…	psx:DR96_3512	K03777	dld	D-lactate dehydrogenase (quinone) [EC:1.1.5.12]	ko00620	Pyruvate metabolism	dld	COG0277	FAD/FMN-containing dehydrogenases	[C]
PHG bin.4
gene2376 2421692 2423428 k141_48446_length_6928_cov_229.5704_4 4476 6212	WP_095100769.1	MULTISPECIES: D-lactate dehydrogenase [Enterobacteriaceae]	P06149.3	RecName: Full=D-lactate dehydrogenase; AltName: Full=Respiratory D-lactate dehydrogenase	Molecular Function: D-lactate dehydrogenase (cytochrome) activity (GO:0004458);|Cellular Component: plasma membrane (GO:0005886);|Cellular Component: integral component of plasma membrane (GO:0005887);|Molecular Function: electron transfer activity (GO:0009055);|Biological Process: aerobic respiration (GO:0009060);|Biological Process: anaerobic respiration (GO:0009061);|Molecular Function: oxidor…	ron:TE10_19665	K03777	dld	D-lactate dehydrogenase (quinone) [EC:1.1.5.12]	ko00620	Pyruvate metabolism	ECs3020	COG0277	FAD/FMN-containing dehydrogenases	[C]
PHG bin.6
gene4634 4244510 4246252 k141_548495_length_4129_cov_22.5218_2 2036 3778	WP_139536585.1	D-lactate dehydrogenase [Klebsiella michiganensis]	P06149.3	RecName: Full=D-lactate dehydrogenase; AltName: Full=Respiratory D-lactate dehydrogenase	Molecular Function: D-lactate dehydrogenase (cytochrome) activity (GO:0004458);|Cellular Component: plasma membrane (GO:0005886);|Cellular Component: integral component of plasma membrane (GO:0005887);|Molecular Function: electron transfer activity (GO:0009055);|Biological Process: aerobic respiration (GO:0009060);|Biological Process: anaerobic respiration (GO:0009061);|Molecular Function: oxidor…	kok:KONIH1_19915	K03777	dld	D-lactate dehydrogenase (quinone) [EC:1.1.5.12]	ko00620	Pyruvate metabolism	STM2167	COG0277	FAD/FMN-containing dehydrogenases	[C]
Acetate kinase
AHG_bin.1
gene2394 2598118 2596916 k141_62474_length_35507_cov_46.7165_24 20638 19436	WP_128877509.1	acetate kinase [Raoultella terrigena]	P63412.1	RecName: Full=Acetate kinase; AltName: Full=Acetokinase	Molecular Function: ATP binding (GO:0005524);|Cellular Component: cytoplasm (GO:0005737);|Biological Process: organic acid metabolic process (GO:0006082);|Biological Process: acetyl-CoA biosynthetic process (GO:0006085);|Molecular Function: acetate kinase activity (GO:0008776);|Molecular Function: metal ion binding (GO:0046872);	ron:TE10_20300	K00925	ackA	acetate kinase [EC:2.7.2.1]	ko00430,ko00620,ko00640,ko00680,ko00720	Taurine and hypotaurine metabolism|Pyruvate metabolism|Propanoate metabolism|Methane metabolism|Carbon fixation pathways in prokaryotes	STM2337	COG0282	Acetate kinase	[C]
AHG bin.4
gene2469 2639420 2638218 k141_405606_length_7042_cov_59.0100_2 2276 1074	WP_095847969.1	acetate kinase [Gibbsiella quercinecans]	A8GH24.1	RecName: Full=Acetate kinase; AltName: Full=Acetokinase	Molecular Function: ATP binding (GO:0005524);|Cellular Component: cytoplasm (GO:0005737);|Biological Process: organic acid metabolic process (GO:0006082);|Biological Process: acetyl-CoA biosynthetic process (GO:0006085);|Molecular Function: acetate kinase activity (GO:0008776);|Molecular Function: metal ion binding (GO:0046872);	smaf:D781_3106	K00925	ackA	acetate kinase [EC:2.7.2.1]	ko00430,ko00620,ko00640,ko00680,ko00720	Taurine and hypotaurine metabolism|Pyruvate metabolism|Propanoate metabolism|Methane metabolism|Carbon fixation pathways in prokaryotes	YPO2566	COG0282	Acetate kinase	[C]
AHG bin.5
gene1415 1525446 1524262 k141_29890_length_11834_cov_20.9328_5 5265 4081	WP_016175978.1	acetate kinase [Enterococcus saccharolyticus]	Q833H0.1	RecName: Full=Acetate kinase; AltName: Full=Acetokinase	Molecular Function: ATP binding (GO:0005524);|Cellular Component: cytoplasm (GO:0005737);|Biological Process: organic acid metabolic process (GO:0006082);|Biological Process: acetyl-CoA biosynthetic process (GO:0006085);|Molecular Function: acetate kinase activity (GO:0008776);|Molecular Function: metal ion binding (GO:0046872);	ecas:ECBG_02292	K00925	ackA	acetate kinase [EC:2.7.2.1]	ko00430,ko00620,ko00640,ko00680,ko00720	Taurine and hypotaurine metabolism|Pyruvate metabolism|Propanoate metabolism|Methane metabolism|Carbon fixation pathways in prokaryotes	lin1616	COG0282	Acetate kinase	[C]
FG bin.1
gene0721 780604 780903 k141_271022_length_33289_cov_72.5218_30 32988 33287	WP_138361380.1	MULTISPECIES: acetate kinase [unclassified Klebsiella]	P63412.1	RecName: Full=Acetate kinase; AltName: Full=Acetokinase	Molecular Function: ATP binding (GO:0005524);|Cellular Component: cytoplasm (GO:0005737);|Biological Process: organic acid metabolic process (GO:0006082);|Biological Process: acetyl-CoA biosynthetic process (GO:0006085);|Molecular Function: acetate kinase activity (GO:0008776);|Molecular Function: metal ion binding (GO:0046872);	ron:TE10_20300	K00925	ackA	acetate kinase [EC:2.7.2.1]	ko00430,ko00620,ko00640,ko00680,ko00720	Taurine and hypotaurine metabolism|Pyruvate metabolism|Propanoate metabolism|Methane metabolism|Carbon fixation pathways in prokaryotes	STM2337	COG0282	Acetate kinase	[C]
gene2652 2853408 2854448 k141_352430_length_13664_cov_64.8764 2 1042	HCR56946.1	acetate kinase [Raoultella sp.]	P63412.1	RecName: Full=Acetate kinase; AltName: Full=Acetokinase	Molecular Function: ATP binding (GO:0005524);|Cellular Component: cytoplasm (GO:0005737);|Biological Process: organic acid metabolic process (GO:0006082);|Biological Process: acetyl-CoA biosynthetic process (GO:0006085);|Molecular Function: acetate kinase activity (GO:0008776);|Molecular Function: metal ion binding (GO:0046872);	ron:TE10_20300	K00925	ackA	acetate kinase [EC:2.7.2.1]	ko00430,ko00620,ko00640,ko00680,ko00720	Taurine and hypotaurine metabolism|Pyruvate metabolism|Propanoate metabolism|Methane metabolism|Carbon fixation pathways in prokaryotes	STM2337	COG0282	Acetate kinase	[C]
MG bin.1
gene0369 391305 390103 k141_527610_length_27394_cov_12.0000_12 11337 10135	WP_128877509.1	acetate kinase [Raoultella terrigena]	P63412.1	RecName: Full=Acetate kinase; AltName: Full=Acetokinase	Molecular Function: ATP binding (GO:0005524);|Cellular Component: cytoplasm (GO:0005737);|Biological Process: organic acid metabolic process (GO:0006082);|Biological Process: acetyl-CoA biosynthetic process (GO:0006085);|Molecular Function: acetate kinase activity (GO:0008776);|Molecular Function: metal ion binding (GO:0046872);	ron:TE10_20300	K00925	ackA	acetate kinase [EC:2.7.2.1]	ko00430,ko00620,ko00640,ko00680,ko00720	Taurine and hypotaurine metabolism|Pyruvate metabolism|Propanoate metabolism|Methane metabolism|Carbon fixation pathways in prokaryotes	STM2337	COG0282	Acetate kinase	[C]
PHG bin.3
gene4243 4322925 4323497 k141_735997_length_4252_cov_9.0000 3 575	WP_004912276.1	MULTISPECIES: acetate kinase [Providencia]	Q7N2I1.1	RecName: Full=Acetate kinase; AltName: Full=Acetokinase	Molecular Function: ATP binding (GO:0005524);|Cellular Component: cytoplasm (GO:0005737);|Biological Process: organic acid metabolic process (GO:0006082);|Biological Process: acetyl-CoA biosynthetic process (GO:0006085);|Molecular Function: acetate kinase activity (GO:0008776);|Molecular Function: metal ion binding (GO:0046872);	psi:S70_02445	K00925	ackA	acetate kinase [EC:2.7.2.1]	ko00430,ko00620,ko00640,ko00680,ko00720	Taurine and hypotaurine metabolism|Pyruvate metabolism|Propanoate metabolism|Methane metabolism|Carbon fixation pathways in prokaryotes	STM2337	COG0282	Acetate kinase	[C]
PHG bin.9
gene2626 2904625 2903441 k141_80656_length_11012_cov_266.1016_2 2120 936	WP_016175978.1	acetate kinase [Enterococcus saccharolyticus]	Q833H0.1	RecName: Full=Acetate kinase; AltName: Full=Acetokinase	Molecular Function: ATP binding (GO:0005524);|Cellular Component: cytoplasm (GO:0005737);|Biological Process: organic acid metabolic process (GO:0006082);|Biological Process: acetyl-CoA biosynthetic process (GO:0006085);|Molecular Function: acetate kinase activity (GO:0008776);|Molecular Function: metal ion binding (GO:0046872);	ecas:ECBG_02292	K00925	ackA	acetate kinase [EC:2.7.2.1]	ko00430,ko00620,ko00640,ko00680,ko00720	Taurine and hypotaurine metabolism|Pyruvate metabolism|Propanoate metabolism|Methane metabolism|Carbon fixation pathways in prokaryotes	lin1616	COG0282	Acetate kinase	[C]
AHG_bin.1
gene1953 2129391 2128177 k141_255711_length_40579_cov_44.3128_11 18723 17509	WP_095098841.1	MULTISPECIES: acetate/propionate family kinase [Enterobacteriaceae]	A8AEL8.2	RecName: Full=Probable propionate kinase	Molecular Function: ATP binding (GO:0005524);|Cellular Component: intracellular (GO:0005622);|Molecular Function: propionate kinase activity (GO:0008980);|Biological Process: propionate catabolic process (GO:0019543);|Biological Process: propanediol catabolic process (GO:0051144);	kok:KONIH1_23980	K19697	pduW	propionate kinase [EC:2.7.2.15]	ko00640	Propanoate metabolism	STM2057	COG0282	Acetate kinase	[C]
FG bin.1
gene0050 41807 43021 k141_390512_length_48213_cov_74.3873_50 41807 43021	WP_095098841.1	MULTISPECIES: acetate/propionate family kinase [Enterobacteriaceae]	A8AEL8.2	RecName: Full=Probable propionate kinase	Molecular Function: ATP binding (GO:0005524);|Cellular Component: intracellular (GO:0005622);|Molecular Function: propionate kinase activity (GO:0008980);|Biological Process: propionate catabolic process (GO:0019543);|Biological Process: propanediol catabolic process (GO:0051144);	kok:KONIH1_23980	K19697	pduW	propionate kinase [EC:2.7.2.15]	ko00640	Propanoate metabolism	STM2057	COG0282	Acetate kinase	[C]
MG bin.1
gene0351 371053 372267 k141_205850_length_28968_cov_14.6140_24 20053 21267	WP_095098841.1	MULTISPECIES: acetate/propionate family kinase [Enterobacteriaceae]	A8AEL8.2	RecName: Full=Probable propionate kinase	Molecular Function: ATP binding (GO:0005524);|Cellular Component: intracellular (GO:0005622);|Molecular Function: propionate kinase activity (GO:0008980);|Biological Process: propionate catabolic process (GO:0019543);|Biological Process: propanediol catabolic process (GO:0051144);	kok:KONIH1_23980	K19697	pduW	propionate kinase [EC:2.7.2.15]	ko00640	Propanoate metabolism	STM2057	COG0282	Acetate kinase	[C]
PHG bin.4
gene0651 660450 661664 k141_363294_length_16243_cov_103.5504_15 9614 10828	WP_095098841.1	MULTISPECIES: acetate/propionate family kinase [Enterobacteriaceae]	A8AEL8.2	RecName: Full=Probable propionate kinase	Molecular Function: ATP binding (GO:0005524);|Cellular Component: intracellular (GO:0005622);|Molecular Function: propionate kinase activity (GO:0008980);|Biological Process: propionate catabolic process (GO:0019543);|Biological Process: propanediol catabolic process (GO:0051144);	kok:KONIH1_23980	K19697	pduW	propionate kinase [EC:2.7.2.15]	ko00640	Propanoate metabolism	STM2057	COG0282	Acetate kinase	[C]
PHG bin.9
gene2458 2269646 2268432 k141_104181_length_7541_cov_22.5755_5 6338 5124	WP_139540145.1	acetate/propionate family kinase [Klebsiella michiganensis]	P74879.2	RecName: Full=Probable propionate kinase	Molecular Function: ATP binding (GO:0005524);|Cellular Component: intracellular (GO:0005622);|Molecular Function: propionate kinase activity (GO:0008980);|Biological Process: propionate catabolic process (GO:0019543);|Biological Process: propanediol catabolic process (GO:0051144);	kok:KONIH1_23980	K19697	pduW	propionate kinase [EC:2.7.2.15]	ko00640	Propanoate metabolism	STM2057	COG0282	Acetate kinase	[C]
AHG_bin.1
gene1656 1803558 1805180 k141_31044_length_45117_cov_60.3120_29 29439 31061	WP_095105293.1	MULTISPECIES: phosphoenolpyruvate carboxykinase (ATP) [Enterobacteriaceae]	Q8Z216.1	RecName: Full=Phosphoenolpyruvate carboxykinase (ATP); Short=PCK; Short=PEP carboxykinase; Short=PEPCK	Molecular Function: phosphoenolpyruvate carboxykinase (ATP) activity (GO:0004612);|Molecular Function: ATP binding (GO:0005524);|Cellular Component: cytoplasm (GO:0005737);|Biological Process: gluconeogenesis (GO:0006094);|Molecular Function: metal ion binding (GO:0046872);	ron:TE10_00465	K01610	E4.1.1.49, pckA	phosphoenolpyruvate carboxykinase (ATP) [EC:4.1.1.49]	ko00010,ko00020,ko00620,ko00710	Glycolysis / Gluconeogenesis|Citrate cycle (TCA cycle)|Pyruvate metabolism|Carbon fixation in photosynthetic organisms	STM3500	COG1866	Phosphoenolpyruvate carboxykinase (ATP)	[C]
gene4261 4575044 4576687 k141_84981_length_14018_cov_37.4943_2 526 2169	WP_095101933.1	MULTISPECIES: phosphoenolpyruvate carboxykinase (ATP) [Enterobacteriaceae]	B2VJU9.1	RecName: Full=Phosphoenolpyruvate carboxykinase (ATP); Short=PCK; Short=PEP carboxykinase; Short=PEPCK	Molecular Function: phosphoenolpyruvate carboxykinase (ATP) activity (GO:0004612);|Molecular Function: ATP binding (GO:0005524);|Cellular Component: cytoplasm (GO:0005737);|Biological Process: gluconeogenesis (GO:0006094);|Molecular Function: metal ion binding (GO:0046872);	ron:TE10_17880	K01610	E4.1.1.49, pckA	phosphoenolpyruvate carboxykinase (ATP) [EC:4.1.1.49]	ko00010,ko00020,ko00620,ko00710	Glycolysis / Gluconeogenesis|Citrate cycle (TCA cycle)|Pyruvate metabolism|Carbon fixation in photosynthetic organisms	pckA	COG1866	Phosphoenolpyruvate carboxykinase (ATP)	[C]
AHG bin.4
gene0225 251940 253559 k141_140300_length_28767_cov_52.4834_14 13470 15089	WP_121554294.1	phosphoenolpyruvate carboxykinase (ATP) [Gibbsiella quercinecans]	Q6CZP5.1	RecName: Full=Phosphoenolpyruvate carboxykinase (ATP); Short=PCK; Short=PEP carboxykinase; Short=PEPCK	Molecular Function: phosphoenolpyruvate carboxykinase (ATP) activity (GO:0004612);|Molecular Function: ATP binding (GO:0005524);|Cellular Component: cytoplasm (GO:0005737);|Biological Process: gluconeogenesis (GO:0006094);|Molecular Function: metal ion binding (GO:0046872);	sfw:WN53_06240	K01610	E4.1.1.49, pckA	phosphoenolpyruvate carboxykinase (ATP) [EC:4.1.1.49]	ko00010,ko00020,ko00620,ko00710	Glycolysis / Gluconeogenesis|Citrate cycle (TCA cycle)|Pyruvate metabolism|Carbon fixation in photosynthetic organisms	YPO0138	COG1866	Phosphoenolpyruvate carboxykinase (ATP)	[C]
FG bin.1
gene0826 885626 883983 k141_18560_length_30779_cov_67.5531_8 9082 7439	WP_095101933.1	MULTISPECIES: phosphoenolpyruvate carboxykinase (ATP) [Enterobacteriaceae]	B2VJU9.1	RecName: Full=Phosphoenolpyruvate carboxykinase (ATP); Short=PCK; Short=PEP carboxykinase; Short=PEPCK	Molecular Function: phosphoenolpyruvate carboxykinase (ATP) activity (GO:0004612);|Molecular Function: ATP binding (GO:0005524);|Cellular Component: cytoplasm (GO:0005737);|Biological Process: gluconeogenesis (GO:0006094);|Molecular Function: metal ion binding (GO:0046872);	ron:TE10_17880	K01610	E4.1.1.49, pckA	phosphoenolpyruvate carboxykinase (ATP) [EC:4.1.1.49]	ko00010,ko00020,ko00620,ko00710	Glycolysis / Gluconeogenesis|Citrate cycle (TCA cycle)|Pyruvate metabolism|Carbon fixation in photosynthetic organisms	pckA	COG1866	Phosphoenolpyruvate carboxykinase (ATP)	[C]
gene3893 4099526 4101148 k141_182226_length_7365_cov_58.7654_2 628 2250	WP_095105293.1	MULTISPECIES: phosphoenolpyruvate carboxykinase (ATP) [Enterobacteriaceae]	Q8Z216.1	RecName: Full=Phosphoenolpyruvate carboxykinase (ATP); Short=PCK; Short=PEP carboxykinase; Short=PEPCK	Molecular Function: phosphoenolpyruvate carboxykinase (ATP) activity (GO:0004612);|Molecular Function: ATP binding (GO:0005524);|Cellular Component: cytoplasm (GO:0005737);|Biological Process: gluconeogenesis (GO:0006094);|Molecular Function: metal ion binding (GO:0046872);	ron:TE10_00465	K01610	E4.1.1.49, pckA	phosphoenolpyruvate carboxykinase (ATP) [EC:4.1.1.49]	ko00010,ko00020,ko00620,ko00710	Glycolysis / Gluconeogenesis|Citrate cycle (TCA cycle)|Pyruvate metabolism|Carbon fixation in photosynthetic organisms	STM3500	COG1866	Phosphoenolpyruvate carboxykinase (ATP)	[C]
MG bin.1
gene0270 298743 297100 k141_335410_length_30209_cov_13.0000_6 7901 6258	WP_095101933.1	MULTISPECIES: phosphoenolpyruvate carboxykinase (ATP) [Enterobacteriaceae]	B2VJU9.1	RecName: Full=Phosphoenolpyruvate carboxykinase (ATP); Short=PCK; Short=PEP carboxykinase; Short=PEPCK	Molecular Function: phosphoenolpyruvate carboxykinase (ATP) activity (GO:0004612);|Molecular Function: ATP binding (GO:0005524);|Cellular Component: cytoplasm (GO:0005737);|Biological Process: gluconeogenesis (GO:0006094);|Molecular Function: metal ion binding (GO:0046872);	ron:TE10_17880	K01610	E4.1.1.49, pckA	phosphoenolpyruvate carboxykinase (ATP) [EC:4.1.1.49]	ko00010,ko00020,ko00620,ko00710	Glycolysis / Gluconeogenesis|Citrate cycle (TCA cycle)|Pyruvate metabolism|Carbon fixation in photosynthetic organisms	pckA	COG1866	Phosphoenolpyruvate carboxykinase (ATP)	[C]
gene5520 5414429 5412807 k141_1983_length_3392_cov_9.0000_2 2768 1146	WP_095105293.1	MULTISPECIES: phosphoenolpyruvate carboxykinase (ATP) [Enterobacteriaceae]	Q8Z216.1	RecName: Full=Phosphoenolpyruvate carboxykinase (ATP); Short=PCK; Short=PEP carboxykinase; Short=PEPCK	Molecular Function: phosphoenolpyruvate carboxykinase (ATP) activity (GO:0004612);|Molecular Function: ATP binding (GO:0005524);|Cellular Component: cytoplasm (GO:0005737);|Biological Process: gluconeogenesis (GO:0006094);|Molecular Function: metal ion binding (GO:0046872);	ron:TE10_00465	K01610	E4.1.1.49, pckA	phosphoenolpyruvate carboxykinase (ATP) [EC:4.1.1.49]	ko00010,ko00020,ko00620,ko00710	Glycolysis / Gluconeogenesis|Citrate cycle (TCA cycle)|Pyruvate metabolism|Carbon fixation in photosynthetic organisms	STM3500	COG1866	Phosphoenolpyruvate carboxykinase (ATP)	[C]
PHG bin.3
gene1185 1267589 1269208 k141_670926_length_13905_cov_11.0000_6 5702 7321	WP_004906570.1	MULTISPECIES: phosphoenolpyruvate carboxykinase (ATP) [Providencia]	Q7NA45.1	RecName: Full=Phosphoenolpyruvate carboxykinase (ATP); Short=PCK; Short=PEP carboxykinase; Short=PEPCK	Molecular Function: phosphoenolpyruvate carboxykinase (ATP) activity (GO:0004612);|Molecular Function: ATP binding (GO:0005524);|Cellular Component: cytoplasm (GO:0005737);|Biological Process: gluconeogenesis (GO:0006094);|Molecular Function: metal ion binding (GO:0046872);	psx:DR96_1192	K01610	E4.1.1.49, pckA	phosphoenolpyruvate carboxykinase (ATP) [EC:4.1.1.49]	ko00010,ko00020,ko00620,ko00710	Glycolysis / Gluconeogenesis|Citrate cycle (TCA cycle)|Pyruvate metabolism|Carbon fixation in photosynthetic organisms	YPO0138	COG1866	Phosphoenolpyruvate carboxykinase (ATP)	[C]
gene4468 4531416 4530670 k141_427532_length_3931_cov_23.0000_5 3931 3185	WP_133363532.1	phosphoenolpyruvate carboxykinase (ATP) [Weissella sp. 26KH-42]				ega:AL523_12080	K01610	E4.1.1.49, pckA	phosphoenolpyruvate carboxykinase (ATP) [EC:4.1.1.49]	ko00010,ko00020,ko00620,ko00710	Glycolysis / Gluconeogenesis|Citrate cycle (TCA cycle)|Pyruvate metabolism|Carbon fixation in photosynthetic organisms
PHG bin.4
gene0750 759502 761124 k141_193462_length_14706_cov_81.7247 186 1808	WP_095105293.1	MULTISPECIES: phosphoenolpyruvate carboxykinase (ATP) [Enterobacteriaceae]	Q8Z216.1	RecName: Full=Phosphoenolpyruvate carboxykinase (ATP); Short=PCK; Short=PEP carboxykinase; Short=PEPCK	Molecular Function: phosphoenolpyruvate carboxykinase (ATP) activity (GO:0004612);|Molecular Function: ATP binding (GO:0005524);|Cellular Component: cytoplasm (GO:0005737);|Biological Process: gluconeogenesis (GO:0006094);|Molecular Function: metal ion binding (GO:0046872);	ron:TE10_00465	K01610	E4.1.1.49, pckA	phosphoenolpyruvate carboxykinase (ATP) [EC:4.1.1.49]	ko00010,ko00020,ko00620,ko00710	Glycolysis / Gluconeogenesis|Citrate cycle (TCA cycle)|Pyruvate metabolism|Carbon fixation in photosynthetic organisms	STM3500	COG1866	Phosphoenolpyruvate carboxykinase (ATP)	[C]
PHG bin.6
gene2106 1952292 1953932 k141_563022_length_8448_cov_15.0000_5 3208 4848	WP_142463201.1	phosphoenolpyruvate carboxykinase (ATP) [Klebsiella michiganensis]	B2VJU9.1	RecName: Full=Phosphoenolpyruvate carboxykinase (ATP); Short=PCK; Short=PEP carboxykinase; Short=PEPCK	Molecular Function: phosphoenolpyruvate carboxykinase (ATP) activity (GO:0004612);|Molecular Function: ATP binding (GO:0005524);|Cellular Component: cytoplasm (GO:0005737);|Biological Process: gluconeogenesis (GO:0006094);|Molecular Function: metal ion binding (GO:0046872);	koy:J415_14275	K01610	E4.1.1.49, pckA	phosphoenolpyruvate carboxykinase (ATP) [EC:4.1.1.49]	ko00010,ko00020,ko00620,ko00710	Glycolysis / Gluconeogenesis|Citrate cycle (TCA cycle)|Pyruvate metabolism|Carbon fixation in photosynthetic organisms	pckA	COG1866	Phosphoenolpyruvate carboxykinase (ATP)	[C]
gene6120 5500143 5501174 k141_434914_length_2643_cov_41.4880 1 1032	WP_121554294.1	phosphoenolpyruvate carboxykinase (ATP) [Gibbsiella quercinecans]	Q664K7.1	RecName: Full=Phosphoenolpyruvate carboxykinase (ATP); Short=PCK; Short=PEP carboxykinase; Short=PEPCK	Molecular Function: phosphoenolpyruvate carboxykinase (ATP) activity (GO:0004612);|Molecular Function: ATP binding (GO:0005524);|Cellular Component: cytoplasm (GO:0005737);|Biological Process: gluconeogenesis (GO:0006094);|Molecular Function: metal ion binding (GO:0046872);	smw:SMWW4_v1c45710	K01610	E4.1.1.49, pckA	phosphoenolpyruvate carboxykinase (ATP) [EC:4.1.1.49]	ko00010,ko00020,ko00620,ko00710	Glycolysis / Gluconeogenesis|Citrate cycle (TCA cycle)|Pyruvate metabolism|Carbon fixation in photosynthetic organisms	YPO0138	COG1866	Phosphoenolpyruvate carboxykinase (ATP)	[C]
AHG_bin.1
gene4904 5244074 5246029 k141_81887_length_5559_cov_52.6811_4 2919 4874	WP_041143640.1	MULTISPECIES: acetate--CoA ligase [Raoultella]	A8AN29.1	RecName: Full=Acetyl-coenzyme A synthetase; Short=AcCoA synthetase; Short=Acs; AltName: Full=Acetate--CoA ligase; AltName: Full=Acyl-activating enzyme	Molecular Function: acetate-CoA ligase activity (GO:0003987);|Molecular Function: ATP binding (GO:0005524);|Molecular Function: AMP binding (GO:0016208);|Biological Process: acetyl-CoA biosynthetic process from acetate (GO:0019427);|Molecular Function: metal ion binding (GO:0046872);	ron:TE10_03995	K01895	ACSS1_2, acs	acetyl-CoA synthetase [EC:6.2.1.1]	ko00010,ko00620,ko00630,ko00640,ko00680,ko00720	Glycolysis / Gluconeogenesis|Pyruvate metabolism|Glyoxylate and dicarboxylate metabolism|Propanoate metabolism|Methane metabolism|Carbon fixation pathways in prokaryotes	acs	COG0365	Acyl-coenzyme A synthetases/AMP-(fatty) acid ligases	[I]
AHG bin.4
gene3712 3831495 3831971 k141_293579_length_3302_cov_56.0000_4 2824 3300	WP_095846207.1	acetate--CoA ligase [Gibbsiella quercinecans]	A8G8G7.1	RecName: Full=Acetyl-coenzyme A synthetase; Short=AcCoA synthetase; Short=Acs; AltName: Full=Acetate--CoA ligase; AltName: Full=Acyl-activating enzyme	Molecular Function: acetate-CoA ligase activity (GO:0003987);|Molecular Function: ATP binding (GO:0005524);|Molecular Function: AMP binding (GO:0016208);|Biological Process: acetyl-CoA biosynthetic process from acetate (GO:0019427);|Molecular Function: metal ion binding (GO:0046872);	sfw:WN53_10035	K01895	ACSS1_2, acs	acetyl-CoA synthetase [EC:6.2.1.1]	ko00010,ko00620,ko00630,ko00640,ko00680,ko00720	Glycolysis / Gluconeogenesis|Pyruvate metabolism|Glyoxylate and dicarboxylate metabolism|Propanoate metabolism|Methane metabolism|Carbon fixation pathways in prokaryotes	YPO0253	COG0365	Acyl-coenzyme A synthetases/AMP-(fatty) acid ligases	[I]
FG bin.1
gene0817 875066 873111 k141_61242_length_31376_cov_71.6394_29 29898 27943	WP_041143640.1	MULTISPECIES: acetate--CoA ligase [Raoultella]	A8AN29.1	RecName: Full=Acetyl-coenzyme A synthetase; Short=AcCoA synthetase; Short=Acs; AltName: Full=Acetate--CoA ligase; AltName: Full=Acyl-activating enzyme	Molecular Function: acetate-CoA ligase activity (GO:0003987);|Molecular Function: ATP binding (GO:0005524);|Molecular Function: AMP binding (GO:0016208);|Biological Process: acetyl-CoA biosynthetic process from acetate (GO:0019427);|Molecular Function: metal ion binding (GO:0046872);	ron:TE10_03995	K01895	ACSS1_2, acs	acetyl-CoA synthetase [EC:6.2.1.1]	ko00010,ko00620,ko00630,ko00640,ko00680,ko00720	Glycolysis / Gluconeogenesis|Pyruvate metabolism|Glyoxylate and dicarboxylate metabolism|Propanoate metabolism|Methane metabolism|Carbon fixation pathways in prokaryotes	acs	COG0365	Acyl-coenzyme A synthetases/AMP-(fatty) acid ligases	[I]
FG bin.2
gene0653 723768 721870 k141_504958_length_197521_cov_17.8269_148 161484 159586	AGE95365.1	acetylcoenzyme a synthetase [Encephalitozoon cuniculi]	A4SJM6.1	RecName: Full=Acetyl-coenzyme A synthetase; Short=AcCoA synthetase; Short=Acs; AltName: Full=Acetate--CoA ligase; AltName: Full=Acyl-activating enzyme	Molecular Function: acetate-CoA ligase activity (GO:0003987);|Molecular Function: ATP binding (GO:0005524);|Molecular Function: AMP binding (GO:0016208);|Biological Process: acetyl-CoA biosynthetic process from acetate (GO:0019427);|Molecular Function: metal ion binding (GO:0046872);	ecu:ECU05_0310	K01895	ACSS1_2, acs	acetyl-CoA synthetase [EC:6.2.1.1]	ko00010,ko00620,ko00630,ko00640,ko00680,ko00720	Glycolysis / Gluconeogenesis|Pyruvate metabolism|Glyoxylate and dicarboxylate metabolism|Propanoate metabolism|Methane metabolism|Carbon fixation pathways in prokaryotes	ECU05g0310	COG0365	Acyl-coenzyme A synthetases/AMP-(fatty) acid ligases	[I]
MG bin.1
gene0076 81773 82531 k141_378041_length_38807_cov_20.0000 3 761	WP_076947840.1	acetate--CoA ligase [Raoultella terrigena]	Q8FAY8.1	RecName: Full=Acetyl-coenzyme A synthetase; Short=AcCoA synthetase; Short=Acs; AltName: Full=Acetate--CoA ligase; AltName: Full=Acyl-activating enzyme	Molecular Function: acetate-CoA ligase activity (GO:0003987);|Molecular Function: ATP binding (GO:0005524);|Molecular Function: AMP binding (GO:0016208);|Biological Process: acetyl-CoA biosynthetic process from acetate (GO:0019427);|Molecular Function: metal ion binding (GO:0046872);	ron:TE10_03995	K01895	ACSS1_2, acs	acetyl-CoA synthetase [EC:6.2.1.1]	ko00010,ko00620,ko00630,ko00640,ko00680,ko00720	Glycolysis / Gluconeogenesis|Pyruvate metabolism|Glyoxylate and dicarboxylate metabolism|Propanoate metabolism|Methane metabolism|Carbon fixation pathways in prokaryotes	acs	COG0365	Acyl-coenzyme A synthetases/AMP-(fatty) acid ligases	[I]
gene5169 5092364 5091063 k141_248933_length_4247_cov_12.3290 1304 3	WP_095104975.1	MULTISPECIES: acetate--CoA ligase [Enterobacteriaceae]	A8AN29.1	RecName: Full=Acetyl-coenzyme A synthetase; Short=AcCoA synthetase; Short=Acs; AltName: Full=Acetate--CoA ligase; AltName: Full=Acyl-activating enzyme	Molecular Function: acetate-CoA ligase activity (GO:0003987);|Molecular Function: ATP binding (GO:0005524);|Molecular Function: AMP binding (GO:0016208);|Biological Process: acetyl-CoA biosynthetic process from acetate (GO:0019427);|Molecular Function: metal ion binding (GO:0046872);	ron:TE10_03995	K01895	ACSS1_2, acs	acetyl-CoA synthetase [EC:6.2.1.1]	ko00010,ko00620,ko00630,ko00640,ko00680,ko00720	Glycolysis / Gluconeogenesis|Pyruvate metabolism|Glyoxylate and dicarboxylate metabolism|Propanoate metabolism|Methane metabolism|Carbon fixation pathways in prokaryotes	acs	COG0365	Acyl-coenzyme A synthetases/AMP-(fatty) acid ligases	[I]
PHG bin.2
gene2675 3106374 3104716 k141_695832_length_106527_cov_24.9980_4 7483 5825	WP_165023326.1	AMP-binding protein [Dysgonomonas sp. ZJ279]	Q3UNX5.2	RecName: Full=Acyl-coenzyme A synthetase ACSM3, mitochondrial; AltName: Full=Acyl-CoA synthetase medium-chain family member 3; AltName: Full=Butyrate--CoA ligase 3; AltName: Full=Butyryl-coenzyme A synthetase 3; AltName: Full=Middle-chain acyl-CoA synthetase 3; AltName: Full=Protein SA homolog; Flags: Precursor	Molecular Function: acyl-CoA ligase activity (GO:0003996);|Molecular Function: fatty-acyl-CoA synthase activity (GO:0004321);|Molecular Function: ATP binding (GO:0005524);|Cellular Component: mitochondrion (GO:0005739);|Cellular Component: mitochondrial matrix (GO:0005759);|Biological Process: fatty acid biosynthetic process (GO:0006633);|Biological Process: acyl-CoA metabolic process (GO:0006637…	pbt:ING2E5B_1296	K01895	ACSS1_2, acs	acetyl-CoA synthetase [EC:6.2.1.1]	ko00010,ko00620,ko00630,ko00640,ko00680,ko00720	Glycolysis / Gluconeogenesis|Pyruvate metabolism|Glyoxylate and dicarboxylate metabolism|Propanoate metabolism|Methane metabolism|Carbon fixation pathways in prokaryotes	MA2912	COG0365	Acyl-coenzyme A synthetases/AMP-(fatty) acid ligases	[I]
PHG bin.3
gene0458 493743 491788 k141_691904_length_22466_cov_12.0000_3 4162 2207	WP_115166313.1	acetate--CoA ligase [Providencia rettgeri]	Q7MBA6.1	RecName: Full=Acetyl-coenzyme A synthetase; Short=AcCoA synthetase; Short=Acs; AltName: Full=Acetate--CoA ligase; AltName: Full=Acyl-activating enzyme	Molecular Function: acetate-CoA ligase activity (GO:0003987);|Molecular Function: ATP binding (GO:0005524);|Molecular Function: AMP binding (GO:0016208);|Biological Process: acetyl-CoA biosynthetic process from acetate (GO:0019427);|Molecular Function: metal ion binding (GO:0046872);	psi:S70_10185	K01895	ACSS1_2, acs	acetyl-CoA synthetase [EC:6.2.1.1]	ko00010,ko00620,ko00630,ko00640,ko00680,ko00720	Glycolysis / Gluconeogenesis|Pyruvate metabolism|Glyoxylate and dicarboxylate metabolism|Propanoate metabolism|Methane metabolism|Carbon fixation pathways in prokaryotes	YPO0253	COG0365	Acyl-coenzyme A synthetases/AMP-(fatty) acid ligases	[I]
PHG bin.4
gene4062 4016826 4016491 k141_30499_length_3256_cov_98.1827 338 3	WP_095104975.1	MULTISPECIES: acetate--CoA ligase [Enterobacteriaceae]	A8AN29.1	RecName: Full=Acetyl-coenzyme A synthetase; Short=AcCoA synthetase; Short=Acs; AltName: Full=Acetate--CoA ligase; AltName: Full=Acyl-activating enzyme	Molecular Function: acetate-CoA ligase activity (GO:0003987);|Molecular Function: ATP binding (GO:0005524);|Molecular Function: AMP binding (GO:0016208);|Biological Process: acetyl-CoA biosynthetic process from acetate (GO:0019427);|Molecular Function: metal ion binding (GO:0046872);	ron:TE10_03995	K01895	ACSS1_2, acs	acetyl-CoA synthetase [EC:6.2.1.1]	ko00010,ko00620,ko00630,ko00640,ko00680,ko00720	Glycolysis / Gluconeogenesis|Pyruvate metabolism|Glyoxylate and dicarboxylate metabolism|Propanoate metabolism|Methane metabolism|Carbon fixation pathways in prokaryotes	Zacs	COG0365	Acyl-coenzyme A synthetases/AMP-(fatty) acid ligases	[I]
PHG bin.6
gene5521 5002573 5001515 k141_216751_length_3243_cov_18.0000 1061 3	WP_047724829.1	MULTISPECIES: acetate--CoA ligase [Klebsiella]	P27550.2	RecName: Full=Acetyl-coenzyme A synthetase; Short=AcCoA synthetase; Short=Acs; AltName: Full=Acetate--CoA ligase; AltName: Full=Acyl-activating enzyme	Molecular Function: acetate-CoA ligase activity (GO:0003987);|Molecular Function: ATP binding (GO:0005524);|Cellular Component: cytosol (GO:0005829);|Molecular Function: AMP binding (GO:0016208);|Biological Process: peptidyl-lysine acetylation (GO:0018394);|Biological Process: acetyl-CoA biosynthetic process from acetate (GO:0019427);|Molecular Function: protein deacetylase activity (GO:0033558);…	kom:HR38_07140	K01895	ACSS1_2, acs	acetyl-CoA synthetase [EC:6.2.1.1]	ko00010,ko00620,ko00630,ko00640,ko00680,ko00720	Glycolysis / Gluconeogenesis|Pyruvate metabolism|Glyoxylate and dicarboxylate metabolism|Propanoate metabolism|Methane metabolism|Carbon fixation pathways in prokaryotes	acs	COG0365	Acyl-coenzyme A synthetases/AMP-(fatty) acid ligases	[I]
Alcohol dehydrogenase
AHG_bin.1
gene2260 2457276 2459954 k141_59454_length_37762_cov_60.8046_30 27988 30666	WP_095102011.1	MULTISPECIES: bifunctional acetaldehyde-CoA/alcohol dehydrogenase [Enterobacteriaceae]	P0A9Q8.2	RecName: Full=Aldehyde-alcohol dehydrogenase; Includes: RecName: Full=Alcohol dehydrogenase; Short=ADH; Includes: RecName: Full=Acetaldehyde dehydrogenase [acetylating]; Short=ACDH; Includes: RecName: Full=Pyruvate-formate-lyase deactivase; Short=PFL deactivase	Molecular Function: alcohol dehydrogenase (NAD) activity (GO:0004022);|Biological Process: alcohol metabolic process (GO:0006066);|Molecular Function: acetaldehyde dehydrogenase (acetylating) activity (GO:0008774);|Biological Process: carbon utilization (GO:0015976);|Molecular Function: metal ion binding (GO:0046872);	ron:TE10_17475	K04072	adhE	acetaldehyde dehydrogenase / alcohol dehydrogenase [EC:1.2.1.10 1.1.1.1]	ko00010,ko00071,ko00350,ko00620,ko00625,ko00626,ko00650,ko05146	Glycolysis / Gluconeogenesis|Fatty acid degradation|Tyrosine metabolism|Pyruvate metabolism|Chloroalkane and chloroalkene degradation|Naphthalene degradation|Butanoate metabolism|Amoebiasis	adhE_1	COG1012	NAD-dependent aldehyde dehydrogenases	[C]
AHG bin.5
gene1020 1102329 1104920 k141_38539_length_14319_cov_18.0000_7 7044 9635	WP_060815662.1	bifunctional acetaldehyde-CoA/alcohol dehydrogenase [Enterococcus gallinarum]	Q24803.1	RecName: Full=Aldehyde-alcohol dehydrogenase 2; Includes: RecName: Full=Alcohol dehydrogenase; Short=ADH; Includes: RecName: Full=Acetaldehyde dehydrogenase; Short=ACDH	Molecular Function: fibronectin binding (GO:0001968);|Molecular Function: alcohol dehydrogenase (NAD) activity (GO:0004022);|Molecular Function: collagen binding (GO:0005518);|Biological Process: alcohol metabolic process (GO:0006066);|Molecular Function: acetaldehyde dehydrogenase (acetylating) activity (GO:0008774);|Biological Process: carbon utilization (GO:0015976);|Molecular Function: lamini…	ecas:ECBG_01601	K04072	adhE	acetaldehyde dehydrogenase / alcohol dehydrogenase [EC:1.2.1.10 1.1.1.1]	ko00010,ko00071,ko00350,ko00620,ko00625,ko00626,ko00650,ko05146	Glycolysis / Gluconeogenesis|Fatty acid degradation|Tyrosine metabolism|Pyruvate metabolism|Chloroalkane and chloroalkene degradation|Naphthalene degradation|Butanoate metabolism|Amoebiasis	SA0143_2	COG1454	Alcohol dehydrogenase, class IV	[C]
gene1190 1282391 1285084 k141_455333_length_12987_cov_17.0000_12 9857 12550	WP_161526125.1	bifunctional acetaldehyde-CoA/alcohol dehydrogenase [Enterococcus sp. JM9B]	P0A9Q8.2	RecName: Full=Aldehyde-alcohol dehydrogenase; Includes: RecName: Full=Alcohol dehydrogenase; Short=ADH; Includes: RecName: Full=Acetaldehyde dehydrogenase [acetylating]; Short=ACDH; Includes: RecName: Full=Pyruvate-formate-lyase deactivase; Short=PFL deactivase	Molecular Function: alcohol dehydrogenase (NAD) activity (GO:0004022);|Biological Process: alcohol metabolic process (GO:0006066);|Molecular Function: acetaldehyde dehydrogenase (acetylating) activity (GO:0008774);|Biological Process: carbon utilization (GO:0015976);|Molecular Function: metal ion binding (GO:0046872);	lsj:LSJ_2149c	K04072	adhE	acetaldehyde dehydrogenase / alcohol dehydrogenase [EC:1.2.1.10 1.1.1.1]	ko00010,ko00071,ko00350,ko00620,ko00625,ko00626,ko00650,ko05146	Glycolysis / Gluconeogenesis|Fatty acid degradation|Tyrosine metabolism|Pyruvate metabolism|Chloroalkane and chloroalkene degradation|Naphthalene degradation|Butanoate metabolism|Amoebiasis	L13145_1	COG1012	NAD-dependent aldehyde dehydrogenases	[C]
FG bin.1
gene0206 225843 228521 k141_191277_length_42029_cov_62.7832_38 39090 41768	WP_095102011.1	MULTISPECIES: bifunctional acetaldehyde-CoA/alcohol dehydrogenase [Enterobacteriaceae]	P0A9Q8.2	RecName: Full=Aldehyde-alcohol dehydrogenase; Includes: RecName: Full=Alcohol dehydrogenase; Short=ADH; Includes: RecName: Full=Acetaldehyde dehydrogenase [acetylating]; Short=ACDH; Includes: RecName: Full=Pyruvate-formate-lyase deactivase; Short=PFL deactivase	Molecular Function: alcohol dehydrogenase (NAD) activity (GO:0004022);|Biological Process: alcohol metabolic process (GO:0006066);|Molecular Function: acetaldehyde dehydrogenase (acetylating) activity (GO:0008774);|Biological Process: carbon utilization (GO:0015976);|Molecular Function: metal ion binding (GO:0046872);	ron:TE10_17475	K04072	adhE	acetaldehyde dehydrogenase / alcohol dehydrogenase [EC:1.2.1.10 1.1.1.1]	ko00010,ko00071,ko00350,ko00620,ko00625,ko00626,ko00650,ko05146	Glycolysis / Gluconeogenesis|Fatty acid degradation|Tyrosine metabolism|Pyruvate metabolism|Chloroalkane and chloroalkene degradation|Naphthalene degradation|Butanoate metabolism|Amoebiasis	adhE_1	COG1012	NAD-dependent aldehyde dehydrogenases	[C]
MG bin.1
gene2210 2248123 2245445 k141_261162_length_13507_cov_13.0195_8 9933 7255	WP_095102011.1	MULTISPECIES: bifunctional acetaldehyde-CoA/alcohol dehydrogenase [Enterobacteriaceae]	P0A9Q8.2	RecName: Full=Aldehyde-alcohol dehydrogenase; Includes: RecName: Full=Alcohol dehydrogenase; Short=ADH; Includes: RecName: Full=Acetaldehyde dehydrogenase [acetylating]; Short=ACDH; Includes: RecName: Full=Pyruvate-formate-lyase deactivase; Short=PFL deactivase	Molecular Function: alcohol dehydrogenase (NAD) activity (GO:0004022);|Biological Process: alcohol metabolic process (GO:0006066);|Molecular Function: acetaldehyde dehydrogenase (acetylating) activity (GO:0008774);|Biological Process: carbon utilization (GO:0015976);|Molecular Function: metal ion binding (GO:0046872);	ron:TE10_17475	K04072	adhE	acetaldehyde dehydrogenase / alcohol dehydrogenase [EC:1.2.1.10 1.1.1.1]	ko00010,ko00071,ko00350,ko00620,ko00625,ko00626,ko00650,ko05146	Glycolysis / Gluconeogenesis|Fatty acid degradation|Tyrosine metabolism|Pyruvate metabolism|Chloroalkane and chloroalkene degradation|Naphthalene degradation|Butanoate metabolism|Amoebiasis	adhE_1	COG1012	NAD-dependent aldehyde dehydrogenases	[C]
PHG bin.3
gene3022 3186884 3187582 k141_639196_length_6785_cov_11.0000 3 701	WP_109913226.1	MULTISPECIES: bifunctional acetaldehyde-CoA/alcohol dehydrogenase [Providencia]	P0A9Q8.2	RecName: Full=Aldehyde-alcohol dehydrogenase; Includes: RecName: Full=Alcohol dehydrogenase; Short=ADH; Includes: RecName: Full=Acetaldehyde dehydrogenase [acetylating]; Short=ACDH; Includes: RecName: Full=Pyruvate-formate-lyase deactivase; Short=PFL deactivase	Molecular Function: alcohol dehydrogenase (NAD) activity (GO:0004022);|Biological Process: alcohol metabolic process (GO:0006066);|Molecular Function: acetaldehyde dehydrogenase (acetylating) activity (GO:0008774);|Biological Process: carbon utilization (GO:0015976);|Molecular Function: metal ion binding (GO:0046872);	psi:S70_00650	K04072	adhE	acetaldehyde dehydrogenase / alcohol dehydrogenase [EC:1.2.1.10 1.1.1.1]	ko00010,ko00071,ko00350,ko00620,ko00625,ko00626,ko00650,ko05146	Glycolysis / Gluconeogenesis|Fatty acid degradation|Tyrosine metabolism|Pyruvate metabolism|Chloroalkane and chloroalkene degradation|Naphthalene degradation|Butanoate metabolism|Amoebiasis	ECs1741_2	COG1454	Alcohol dehydrogenase, class IV	[C]
gene5512 5404113 5403769 k141_625204_length_1800_cov_12.0000 347 3	WP_166184431.1	bifunctional acetaldehyde-CoA/alcohol dehydrogenase [Providencia sp. M-8]	P0A9Q8.2	RecName: Full=Aldehyde-alcohol dehydrogenase; Includes: RecName: Full=Alcohol dehydrogenase; Short=ADH; Includes: RecName: Full=Acetaldehyde dehydrogenase [acetylating]; Short=ACDH; Includes: RecName: Full=Pyruvate-formate-lyase deactivase; Short=PFL deactivase	Molecular Function: alcohol dehydrogenase (NAD) activity (GO:0004022);|Biological Process: alcohol metabolic process (GO:0006066);|Molecular Function: acetaldehyde dehydrogenase (acetylating) activity (GO:0008774);|Biological Process: carbon utilization (GO:0015976);|Molecular Function: metal ion binding (GO:0046872);	psx:DR96_3274	K04072	adhE	acetaldehyde dehydrogenase / alcohol dehydrogenase [EC:1.2.1.10 1.1.1.1]	ko00010,ko00071,ko00350,ko00620,ko00625,ko00626,ko00650,ko05146	Glycolysis / Gluconeogenesis|Fatty acid degradation|Tyrosine metabolism|Pyruvate metabolism|Chloroalkane and chloroalkene degradation|Naphthalene degradation|Butanoate metabolism|Amoebiasis	YPO2180_1	COG1012	NAD-dependent aldehyde dehydrogenases	[C]
PHG bin.9
gene0199 236258 238951 k141_703374_length_90693_cov_48.4279_32 41882 44575	WP_161526125.1	bifunctional acetaldehyde-CoA/alcohol dehydrogenase [Enterococcus sp. JM9B]	P0A9Q8.2	RecName: Full=Aldehyde-alcohol dehydrogenase; Includes: RecName: Full=Alcohol dehydrogenase; Short=ADH; Includes: RecName: Full=Acetaldehyde dehydrogenase [acetylating]; Short=ACDH; Includes: RecName: Full=Pyruvate-formate-lyase deactivase; Short=PFL deactivase	Molecular Function: alcohol dehydrogenase (NAD) activity (GO:0004022);|Biological Process: alcohol metabolic process (GO:0006066);|Molecular Function: acetaldehyde dehydrogenase (acetylating) activity (GO:0008774);|Biological Process: carbon utilization (GO:0015976);|Molecular Function: metal ion binding (GO:0046872);	lsj:LSJ_2149c	K04072	adhE	acetaldehyde dehydrogenase / alcohol dehydrogenase [EC:1.2.1.10 1.1.1.1]	ko00010,ko00071,ko00350,ko00620,ko00625,ko00626,ko00650,ko05146	Glycolysis / Gluconeogenesis|Fatty acid degradation|Tyrosine metabolism|Pyruvate metabolism|Chloroalkane and chloroalkene degradation|Naphthalene degradation|Butanoate metabolism|Amoebiasis	L13145_1	COG1012	NAD-dependent aldehyde dehydrogenases	[C]
gene3027 3331556 3328965 k141_619590_length_5518_cov_55.5617_4 5131 2540	WP_060815662.1	bifunctional acetaldehyde-CoA/alcohol dehydrogenase [Enterococcus gallinarum]	Q24803.1	RecName: Full=Aldehyde-alcohol dehydrogenase 2; Includes: RecName: Full=Alcohol dehydrogenase; Short=ADH; Includes: RecName: Full=Acetaldehyde dehydrogenase; Short=ACDH	Molecular Function: fibronectin binding (GO:0001968);|Molecular Function: alcohol dehydrogenase (NAD) activity (GO:0004022);|Molecular Function: collagen binding (GO:0005518);|Biological Process: alcohol metabolic process (GO:0006066);|Molecular Function: acetaldehyde dehydrogenase (acetylating) activity (GO:0008774);|Biological Process: carbon utilization (GO:0015976);|Molecular Function: lamini…	ecas:ECBG_01601	K04072	adhE	acetaldehyde dehydrogenase / alcohol dehydrogenase [EC:1.2.1.10 1.1.1.1]	ko00010,ko00071,ko00350,ko00620,ko00625,ko00626,ko00650,ko05146	Glycolysis / Gluconeogenesis|Fatty acid degradation|Tyrosine metabolism|Pyruvate metabolism|Chloroalkane and chloroalkene degradation|Naphthalene degradation|Butanoate metabolism|Amoebiasis	SA0143_2	COG1454	Alcohol dehydrogenase, class IV	[C]
AHG_bin.1
gene0298 311409 312557 k141_372894_length_79967_cov_98.2407_73 65353 66501	WP_095105342.1	MULTISPECIES: lactaldehyde reductase [Enterobacteriaceae]	P37686.4	RecName: Full=Probable alcohol dehydrogenase	Molecular Function: alcohol dehydrogenase (NAD) activity (GO:0004022);|Molecular Function: L-threonine 3-dehydrogenase activity (GO:0008743);|Molecular Function: metal ion binding (GO:0046872);	ron:TE10_02675	K00001	E1.1.1.1, adh	alcohol dehydrogenase [EC:1.1.1.1]	ko00010,ko00071,ko00350,ko00625,ko00626,ko00830,ko00980,ko00982	Glycolysis / Gluconeogenesis|Fatty acid degradation|Tyrosine metabolism|Chloroalkane and chloroalkene degradation|Naphthalene degradation|Retinol metabolism|Metabolism of xenobiotics by cytochrome P450|Drug metabolism - cytochrome P450	STM4044	COG1454	Alcohol dehydrogenase, class IV	[C]
AHG bin.4
gene0857 956611 955463 k141_259765_length_16414_cov_44.6335_5 5365 4217	WP_095846879.1	lactaldehyde reductase [Gibbsiella quercinecans]	P37686.4	RecName: Full=Probable alcohol dehydrogenase	Molecular Function: alcohol dehydrogenase (NAD) activity (GO:0004022);|Molecular Function: L-threonine 3-dehydrogenase activity (GO:0008743);|Molecular Function: metal ion binding (GO:0046872);	senj:CFSAN001992_13475	K00001	E1.1.1.1, adh	alcohol dehydrogenase [EC:1.1.1.1]	ko00010,ko00071,ko00350,ko00625,ko00626,ko00830,ko00980,ko00982	Glycolysis / Gluconeogenesis|Fatty acid degradation|Tyrosine metabolism|Chloroalkane and chloroalkene degradation|Naphthalene degradation|Retinol metabolism|Metabolism of xenobiotics by cytochrome P450|Drug metabolism - cytochrome P450	STM4044	COG1454	Alcohol dehydrogenase, class IV	[C]
FG bin.1
gene1474 1572004 1570856 k141_224786_length_21865_cov_59.7535_8 8646 7498	WP_095105342.1	MULTISPECIES: lactaldehyde reductase [Enterobacteriaceae]	P37686.4	RecName: Full=Probable alcohol dehydrogenase	Molecular Function: alcohol dehydrogenase (NAD) activity (GO:0004022);|Molecular Function: L-threonine 3-dehydrogenase activity (GO:0008743);|Molecular Function: metal ion binding (GO:0046872);	ron:TE10_02675	K00001	E1.1.1.1, adh	alcohol dehydrogenase [EC:1.1.1.1]	ko00010,ko00071,ko00350,ko00625,ko00626,ko00830,ko00980,ko00982	Glycolysis / Gluconeogenesis|Fatty acid degradation|Tyrosine metabolism|Chloroalkane and chloroalkene degradation|Naphthalene degradation|Retinol metabolism|Metabolism of xenobiotics by cytochrome P450|Drug metabolism - cytochrome P450	STM4044	COG1454	Alcohol dehydrogenase, class IV	[C]
MG bin.1
gene3766 3762051 3760903 k141_368812_length_8123_cov_14.0000_7 5610 4462	WP_095105342.1	MULTISPECIES: lactaldehyde reductase [Enterobacteriaceae]	P37686.4	RecName: Full=Probable alcohol dehydrogenase	Molecular Function: alcohol dehydrogenase (NAD) activity (GO:0004022);|Molecular Function: L-threonine 3-dehydrogenase activity (GO:0008743);|Molecular Function: metal ion binding (GO:0046872);	ron:TE10_02675	K00001	E1.1.1.1, adh	alcohol dehydrogenase [EC:1.1.1.1]	ko00010,ko00071,ko00350,ko00625,ko00626,ko00830,ko00980,ko00982	Glycolysis / Gluconeogenesis|Fatty acid degradation|Tyrosine metabolism|Chloroalkane and chloroalkene degradation|Naphthalene degradation|Retinol metabolism|Metabolism of xenobiotics by cytochrome P450|Drug metabolism - cytochrome P450	STM4044	COG1454	Alcohol dehydrogenase, class IV	[C]
PHG bin.4
gene2195 2239534 2240682 k141_122854_length_7424_cov_86.3365_4 2693 3841	WP_095105342.1	MULTISPECIES: lactaldehyde reductase [Enterobacteriaceae]	P37686.4	RecName: Full=Probable alcohol dehydrogenase	Molecular Function: alcohol dehydrogenase (NAD) activity (GO:0004022);|Molecular Function: L-threonine 3-dehydrogenase activity (GO:0008743);|Molecular Function: metal ion binding (GO:0046872);	ron:TE10_02675	K00001	E1.1.1.1, adh	alcohol dehydrogenase [EC:1.1.1.1]	ko00010,ko00071,ko00350,ko00625,ko00626,ko00830,ko00980,ko00982	Glycolysis / Gluconeogenesis|Fatty acid degradation|Tyrosine metabolism|Chloroalkane and chloroalkene degradation|Naphthalene degradation|Retinol metabolism|Metabolism of xenobiotics by cytochrome P450|Drug metabolism - cytochrome P450	STM4044	COG1454	Alcohol dehydrogenase, class IV	[C]
PHG bin.6
gene0733 687071 688219 k141_745156_length_17468_cov_22.2545_2 658 1806	WP_110276121.1	lactaldehyde reductase [Klebsiella oxytoca]	P37686.4	RecName: Full=Probable alcohol dehydrogenase	Molecular Function: alcohol dehydrogenase (NAD) activity (GO:0004022);|Molecular Function: L-threonine 3-dehydrogenase activity (GO:0008743);|Molecular Function: metal ion binding (GO:0046872);	kom:HR38_05710	K00001	E1.1.1.1, adh	alcohol dehydrogenase [EC:1.1.1.1]	ko00010,ko00071,ko00350,ko00625,ko00626,ko00830,ko00980,ko00982	Glycolysis / Gluconeogenesis|Fatty acid degradation|Tyrosine metabolism|Chloroalkane and chloroalkene degradation|Naphthalene degradation|Retinol metabolism|Metabolism of xenobiotics by cytochrome P450|Drug metabolism - cytochrome P450	STM4044	COG1454	Alcohol dehydrogenase, class IV	[C]
AHG_bin.1
gene2332 2538723 2539841 k141_371546_length_36837_cov_46.2078_32 34550 35668	WP_095097398.1	MULTISPECIES: S-(hydroxymethyl)glutathione dehydrogenase/class III alcohol dehydrogenase [Enterobacteriaceae]	P39450.1	RecName: Full=S-(hydroxymethyl)glutathione dehydrogenase; AltName: Full=Alcohol dehydrogenase class-3; AltName: Full=Alcohol dehydrogenase class-III; AltName: Full=Glutathione-dependent formaldehyde dehydrogenase; Short=FALDH; Short=FDH; Short=GSH-FDH	Molecular Function: alcohol dehydrogenase (NAD) activity (GO:0004022);|Cellular Component: cytoplasm (GO:0005737);|Biological Process: ethanol oxidation (GO:0006069);|Molecular Function: zinc ion binding (GO:0008270);|Molecular Function: S-(hydroxymethyl)glutathione dehydrogenase activity (GO:0051903);	ron:TE10_13315	K00121	frmA, ADH5, adhC	S-(hydroxymethyl)glutathione dehydrogenase / alcohol dehydrogenase [EC:1.1.1.284 1.1.1.1]	ko00010,ko00071,ko00350,ko00625,ko00626,ko00680,ko00830,ko00980,ko00982,ko05204	Glycolysis / Gluconeogenesis|Fatty acid degradation|Tyrosine metabolism|Chloroalkane and chloroalkene degradation|Naphthalene degradation|Methane metabolism|Retinol metabolism|Metabolism of xenobiotics by cytochrome P450|Drug metabolism - cytochrome P450|Chemical carcinogenesis	STM1627	COG1062	Zn-dependent alcohol dehydrogenases, class III	[C]
AHG bin.4
gene3029 3180322 3181446 k141_113176_length_5316_cov_261.6587_5 3528 4652	WP_095845261.1	S-(hydroxymethyl)glutathione dehydrogenase/class III alcohol dehydrogenase [Gibbsiella quercinecans]	P39450.1	RecName: Full=S-(hydroxymethyl)glutathione dehydrogenase; AltName: Full=Alcohol dehydrogenase class-3; AltName: Full=Alcohol dehydrogenase class-III; AltName: Full=Glutathione-dependent formaldehyde dehydrogenase; Short=FALDH; Short=FDH; Short=GSH-FDH	Molecular Function: alcohol dehydrogenase (NAD) activity (GO:0004022);|Cellular Component: cytoplasm (GO:0005737);|Biological Process: ethanol oxidation (GO:0006069);|Molecular Function: zinc ion binding (GO:0008270);|Molecular Function: S-(hydroxymethyl)glutathione dehydrogenase activity (GO:0051903);	smac:SMDB11_0823	K00121	frmA, ADH5, adhC	S-(hydroxymethyl)glutathione dehydrogenase / alcohol dehydrogenase [EC:1.1.1.284 1.1.1.1]	ko00010,ko00071,ko00350,ko00625,ko00626,ko00680,ko00830,ko00980,ko00982,ko05204	Glycolysis / Gluconeogenesis|Fatty acid degradation|Tyrosine metabolism|Chloroalkane and chloroalkene degradation|Naphthalene degradation|Methane metabolism|Retinol metabolism|Metabolism of xenobiotics by cytochrome P450|Drug metabolism - cytochrome P450|Chemical carcinogenesis	YPO1502	COG1062	Zn-dependent alcohol dehydrogenases, class III	[C]
FG bin.1
gene3764 3967982 3969100 k141_27596_length_7965_cov_65.1926_2 411 1529	WP_095097398.1	MULTISPECIES: S-(hydroxymethyl)glutathione dehydrogenase/class III alcohol dehydrogenase [Enterobacteriaceae]	P39450.1	RecName: Full=S-(hydroxymethyl)glutathione dehydrogenase; AltName: Full=Alcohol dehydrogenase class-3; AltName: Full=Alcohol dehydrogenase class-III; AltName: Full=Glutathione-dependent formaldehyde dehydrogenase; Short=FALDH; Short=FDH; Short=GSH-FDH	Molecular Function: alcohol dehydrogenase (NAD) activity (GO:0004022);|Cellular Component: cytoplasm (GO:0005737);|Biological Process: ethanol oxidation (GO:0006069);|Molecular Function: zinc ion binding (GO:0008270);|Molecular Function: S-(hydroxymethyl)glutathione dehydrogenase activity (GO:0051903);	ron:TE10_13315	K00121	frmA, ADH5, adhC	S-(hydroxymethyl)glutathione dehydrogenase / alcohol dehydrogenase [EC:1.1.1.284 1.1.1.1]	ko00010,ko00071,ko00350,ko00625,ko00626,ko00680,ko00830,ko00980,ko00982,ko05204	Glycolysis / Gluconeogenesis|Fatty acid degradation|Tyrosine metabolism|Chloroalkane and chloroalkene degradation|Naphthalene degradation|Methane metabolism|Retinol metabolism|Metabolism of xenobiotics by cytochrome P450|Drug metabolism - cytochrome P450|Chemical carcinogenesis	STM1627	COG1062	Zn-dependent alcohol dehydrogenases, class III	[C]
mG bin.1
gene4987 4924686 4925804 k141_164070_length_4767_cov_9.0000_5 1795 2913	WP_095097398.1	MULTISPECIES: S-(hydroxymethyl)glutathione dehydrogenase/class III alcohol dehydrogenase [Enterobacteriaceae]	P39450.1	RecName: Full=S-(hydroxymethyl)glutathione dehydrogenase; AltName: Full=Alcohol dehydrogenase class-3; AltName: Full=Alcohol dehydrogenase class-III; AltName: Full=Glutathione-dependent formaldehyde dehydrogenase; Short=FALDH; Short=FDH; Short=GSH-FDH	Molecular Function: alcohol dehydrogenase (NAD) activity (GO:0004022);|Cellular Component: cytoplasm (GO:0005737);|Biological Process: ethanol oxidation (GO:0006069);|Molecular Function: zinc ion binding (GO:0008270);|Molecular Function: S-(hydroxymethyl)glutathione dehydrogenase activity (GO:0051903);	ron:TE10_13315	K00121	frmA, ADH5, adhC	S-(hydroxymethyl)glutathione dehydrogenase / alcohol dehydrogenase [EC:1.1.1.284 1.1.1.1]	ko00010,ko00071,ko00350,ko00625,ko00626,ko00680,ko00830,ko00980,ko00982,ko05204	Glycolysis / Gluconeogenesis|Fatty acid degradation|Tyrosine metabolism|Chloroalkane and chloroalkene degradation|Naphthalene degradation|Methane metabolism|Retinol metabolism|Metabolism of xenobiotics by cytochrome P450|Drug metabolism - cytochrome P450|Chemical carcinogenesis	STM1627	COG1062	Zn-dependent alcohol dehydrogenases, class III	[C]
PHG bin.3
gene2310 2434728 2435840 k141_99616_length_9017_cov_8.0000_6 4906 6018	WP_004912967.1	MULTISPECIES: S-(hydroxymethyl)glutathione dehydrogenase/class III alcohol dehydrogenase [Providencia]	P39450.1	RecName: Full=S-(hydroxymethyl)glutathione dehydrogenase; AltName: Full=Alcohol dehydrogenase class-3; AltName: Full=Alcohol dehydrogenase class-III; AltName: Full=Glutathione-dependent formaldehyde dehydrogenase; Short=FALDH; Short=FDH; Short=GSH-FDH	Molecular Function: alcohol dehydrogenase (NAD) activity (GO:0004022);|Cellular Component: cytoplasm (GO:0005737);|Biological Process: ethanol oxidation (GO:0006069);|Molecular Function: zinc ion binding (GO:0008270);|Molecular Function: S-(hydroxymethyl)glutathione dehydrogenase activity (GO:0051903);	psi:S70_20825	K00121	frmA, ADH5, adhC	S-(hydroxymethyl)glutathione dehydrogenase / alcohol dehydrogenase [EC:1.1.1.284 1.1.1.1]	ko00010,ko00071,ko00350,ko00625,ko00626,ko00680,ko00830,ko00980,ko00982,ko05204	Glycolysis / Gluconeogenesis|Fatty acid degradation|Tyrosine metabolism|Chloroalkane and chloroalkene degradation|Naphthalene degradation|Methane metabolism|Retinol metabolism|Metabolism of xenobiotics by cytochrome P450|Drug metabolism - cytochrome P450|Chemical carcinogenesis	ECs0411	COG1062	Zn-dependent alcohol dehydrogenases, class III	[C]
PHG bin.4
gene1489 1523787 1522669 k141_273678_length_10383_cov_69.0968_8 10033 8915	WP_095097398.1	MULTISPECIES: S-(hydroxymethyl)glutathione dehydrogenase/class III alcohol dehydrogenase [Enterobacteriaceae]	P39450.1	RecName: Full=S-(hydroxymethyl)glutathione dehydrogenase; AltName: Full=Alcohol dehydrogenase class-3; AltName: Full=Alcohol dehydrogenase class-III; AltName: Full=Glutathione-dependent formaldehyde dehydrogenase; Short=FALDH; Short=FDH; Short=GSH-FDH	Molecular Function: alcohol dehydrogenase (NAD) activity (GO:0004022);|Cellular Component: cytoplasm (GO:0005737);|Biological Process: ethanol oxidation (GO:0006069);|Molecular Function: zinc ion binding (GO:0008270);|Molecular Function: S-(hydroxymethyl)glutathione dehydrogenase activity (GO:0051903);	ron:TE10_13315	K00121	frmA, ADH5, adhC	S-(hydroxymethyl)glutathione dehydrogenase / alcohol dehydrogenase [EC:1.1.1.284 1.1.1.1]	ko00010,ko00071,ko00350,ko00625,ko00626,ko00680,ko00830,ko00980,ko00982,ko05204	Glycolysis / Gluconeogenesis|Fatty acid degradation|Tyrosine metabolism|Chloroalkane and chloroalkene degradation|Naphthalene degradation|Methane metabolism|Retinol metabolism|Metabolism of xenobiotics by cytochrome P450|Drug metabolism - cytochrome P450|Chemical carcinogenesis	STM1627	COG1062	Zn-dependent alcohol dehydrogenases, class III	[C]
PHG bin.6
gene1293 1208759 1209460 k141_109901_length_11782_cov_51.5926_12 11080 11781	WP_049115543.1	MULTISPECIES: S-(hydroxymethyl)glutathione dehydrogenase/class III alcohol dehydrogenase [Klebsiella]	P25437.3	RecName: Full=S-(hydroxymethyl)glutathione dehydrogenase; AltName: Full=Alcohol dehydrogenase class-3; AltName: Full=Alcohol dehydrogenase class-III; AltName: Full=Glutathione-dependent formaldehyde dehydrogenase; Short=FALDH; Short=FDH; Short=GSH-FDH	Molecular Function: alcohol dehydrogenase activity, zinc-dependent (GO:0004024);|Cellular Component: cytoplasm (GO:0005737);|Cellular Component: cytosol (GO:0005829);|Biological Process: ethanol oxidation (GO:0006069);|Molecular Function: zinc ion binding (GO:0008270);|Molecular Function: identical protein binding (GO:0042802);|Biological Process: formaldehyde catabolic process (GO:0046294);|Mole…	koy:J415_18030	K00121	frmA, ADH5, adhC	S-(hydroxymethyl)glutathione dehydrogenase / alcohol dehydrogenase [EC:1.1.1.284 1.1.1.1]	ko00010,ko00071,ko00350,ko00625,ko00626,ko00680,ko00830,ko00980,ko00982,ko05204	Glycolysis / Gluconeogenesis|Fatty acid degradation|Tyrosine metabolism|Chloroalkane and chloroalkene degradation|Naphthalene degradation|Methane metabolism|Retinol metabolism|Metabolism of xenobiotics by cytochrome P450|Drug metabolism - cytochrome P450|Chemical carcinogenesis	STM1627	COG1062	Zn-dependent alcohol dehydrogenases, class III	[C]
gene5175 4718331 4718654 k141_310738_length_3595_cov_10.0000 1 324	WP_109213333.1	MULTISPECIES: S-(hydroxymethyl)glutathione dehydrogenase/class III alcohol dehydrogenase [Klebsiella]	P39450.1	RecName: Full=S-(hydroxymethyl)glutathione dehydrogenase; AltName: Full=Alcohol dehydrogenase class-3; AltName: Full=Alcohol dehydrogenase class-III; AltName: Full=Glutathione-dependent formaldehyde dehydrogenase; Short=FALDH; Short=FDH; Short=GSH-FDH	Molecular Function: alcohol dehydrogenase (NAD) activity (GO:0004022);|Cellular Component: cytoplasm (GO:0005737);|Biological Process: ethanol oxidation (GO:0006069);|Molecular Function: zinc ion binding (GO:0008270);|Molecular Function: S-(hydroxymethyl)glutathione dehydrogenase activity (GO:0051903);	kok:KONIH1_13660	K00121	frmA, ADH5, adhC	S-(hydroxymethyl)glutathione dehydrogenase / alcohol dehydrogenase [EC:1.1.1.284 1.1.1.1]	ko00010,ko00071,ko00350,ko00625,ko00626,ko00680,ko00830,ko00980,ko00982,ko05204	Glycolysis / Gluconeogenesis|Fatty acid degradation|Tyrosine metabolism|Chloroalkane and chloroalkene degradation|Naphthalene degradation|Methane metabolism|Retinol metabolism|Metabolism of xenobiotics by cytochrome P450|Drug metabolism - cytochrome P450|Chemical carcinogenesis	STM1627	COG1062	Zn-dependent alcohol dehydrogenases, class III	[C]
AHG_bin.1
gene0426 443191 444237 k141_27246_length_78455_cov_40.0548_43 38449 39495	WP_095095926.1	MULTISPECIES: alcohol dehydrogenase AdhP [Enterobacteriaceae]	P20368.2	RecName: Full=Alcohol dehydrogenase 1; AltName: Full=Alcohol dehydrogenase I; Short=ADH I	Molecular Function: alcohol dehydrogenase (NAD) activity (GO:0004022);|Molecular Function: zinc ion binding (GO:0008270);|Biological Process: ethanol biosynthetic process involved in glucose fermentation to ethanol (GO:0043458);	cama:F384_04835	K13953	adhP	alcohol dehydrogenase, propanol-preferring [EC:1.1.1.1]	ko00010,ko00071,ko00350,ko00625,ko00626,ko00830,ko00980,ko00982	Glycolysis / Gluconeogenesis|Fatty acid degradation|Tyrosine metabolism|Chloroalkane and chloroalkene degradation|Naphthalene degradation|Retinol metabolism|Metabolism of xenobiotics by cytochrome P450|Drug metabolism - cytochrome P450	SP0285	COG1064	Zn-dependent alcohol dehydrogenases	[R]
gene1485 1616013 1615003 k141_137665_length_47824_cov_47.6509_23 27996 26986	WP_045855299.1	alcohol dehydrogenase AdhP [Raoultella terrigena]	P39451.1	RecName: Full=Alcohol dehydrogenase, propanol-preferring	Molecular Function: alcohol dehydrogenase (NAD) activity (GO:0004022);|Biological Process: cellular response to DNA damage stimulus (GO:0006974);|Molecular Function: zinc ion binding (GO:0008270);|Biological Process: response to ethanol (GO:0045471);|Biological Process: acetaldehyde catabolic process (GO:0046187);	ron:TE10_13910	K13953	adhP	alcohol dehydrogenase, propanol-preferring [EC:1.1.1.1]	ko00010,ko00071,ko00350,ko00625,ko00626,ko00830,ko00980,ko00982	Glycolysis / Gluconeogenesis|Fatty acid degradation|Tyrosine metabolism|Chloroalkane and chloroalkene degradation|Naphthalene degradation|Retinol metabolism|Metabolism of xenobiotics by cytochrome P450|Drug metabolism - cytochrome P450	STM1567	COG1064	Zn-dependent alcohol dehydrogenases	[R]
AHG bin.4
gene0292 339946 338921 k141_269174_length_26099_cov_64.4975_16 18625 17600	WP_121555263.1	alcohol dehydrogenase AdhP [Gibbsiella quercinecans]	O31186.1	RecName: Full=Alcohol dehydrogenase	Molecular Function: alcohol dehydrogenase (NAD) activity (GO:0004022);|Molecular Function: zinc ion binding (GO:0008270);	ccon:AFK62_10260	K13953	adhP	alcohol dehydrogenase, propanol-preferring [EC:1.1.1.1]	ko00010,ko00071,ko00350,ko00625,ko00626,ko00830,ko00980,ko00982	Glycolysis / Gluconeogenesis|Fatty acid degradation|Tyrosine metabolism|Chloroalkane and chloroalkene degradation|Naphthalene degradation|Retinol metabolism|Metabolism of xenobiotics by cytochrome P450|Drug metabolism - cytochrome P450	BMEI1746	COG1064	Zn-dependent alcohol dehydrogenases	[R]
gene2101 2266853 2266092 k141_425409_length_8142_cov_45.3988_7 8141 7380	WP_095845114.1	alcohol dehydrogenase AdhP [Gibbsiella quercinecans]	P39451.1	RecName: Full=Alcohol dehydrogenase, propanol-preferring	Molecular Function: alcohol dehydrogenase (NAD) activity (GO:0004022);|Biological Process: cellular response to DNA damage stimulus (GO:0006974);|Molecular Function: zinc ion binding (GO:0008270);|Biological Process: response to ethanol (GO:0045471);|Biological Process: acetaldehyde catabolic process (GO:0046187);	kok:KONIH1_14155	K13953	adhP	alcohol dehydrogenase, propanol-preferring [EC:1.1.1.1]	ko00010,ko00071,ko00350,ko00625,ko00626,ko00830,ko00980,ko00982	Glycolysis / Gluconeogenesis|Fatty acid degradation|Tyrosine metabolism|Chloroalkane and chloroalkene degradation|Naphthalene degradation|Retinol metabolism|Metabolism of xenobiotics by cytochrome P450|Drug metabolism - cytochrome P450	ZadhP	COG1064	Zn-dependent alcohol dehydrogenases	[R]
gene3041 3192040 3192672 k141_212754_length_5281_cov_49.0000_5 4648 5280	WP_095845114.1	alcohol dehydrogenase AdhP [Gibbsiella quercinecans]	P39451.1	RecName: Full=Alcohol dehydrogenase, propanol-preferring	Molecular Function: alcohol dehydrogenase (NAD) activity (GO:0004022);|Biological Process: cellular response to DNA damage stimulus (GO:0006974);|Molecular Function: zinc ion binding (GO:0008270);|Biological Process: response to ethanol (GO:0045471);|Biological Process: acetaldehyde catabolic process (GO:0046187);	koy:J415_17530	K13953	adhP	alcohol dehydrogenase, propanol-preferring [EC:1.1.1.1]	ko00010,ko00071,ko00350,ko00625,ko00626,ko00830,ko00980,ko00982	Glycolysis / Gluconeogenesis|Fatty acid degradation|Tyrosine metabolism|Chloroalkane and chloroalkene degradation|Naphthalene degradation|Retinol metabolism|Metabolism of xenobiotics by cytochrome P450|Drug metabolism - cytochrome P450	STM1567	COG1064	Zn-dependent alcohol dehydrogenases	[R]
FG bin.1
gene0622 676827 675817 k141_74113_length_35847_cov_77.1856_28 33585 32575	WP_045855299.1	alcohol dehydrogenase AdhP [Raoultella terrigena]	P39451.1	RecName: Full=Alcohol dehydrogenase, propanol-preferring	Molecular Function: alcohol dehydrogenase (NAD) activity (GO:0004022);|Biological Process: cellular response to DNA damage stimulus (GO:0006974);|Molecular Function: zinc ion binding (GO:0008270);|Biological Process: response to ethanol (GO:0045471);|Biological Process: acetaldehyde catabolic process (GO:0046187);	ron:TE10_13910	K13953	adhP	alcohol dehydrogenase, propanol-preferring [EC:1.1.1.1]	ko00010,ko00071,ko00350,ko00625,ko00626,ko00830,ko00980,ko00982	Glycolysis / Gluconeogenesis|Fatty acid degradation|Tyrosine metabolism|Chloroalkane and chloroalkene degradation|Naphthalene degradation|Retinol metabolism|Metabolism of xenobiotics by cytochrome P450|Drug metabolism - cytochrome P450	STM1567	COG1064	Zn-dependent alcohol dehydrogenases	[R]
gene1924 2058399 2059445 k141_371112_length_18253_cov_63.4426_9 5827 6873	WP_095095926.1	MULTISPECIES: alcohol dehydrogenase AdhP [Enterobacteriaceae]	P20368.2	RecName: Full=Alcohol dehydrogenase 1; AltName: Full=Alcohol dehydrogenase I; Short=ADH I	Molecular Function: alcohol dehydrogenase (NAD) activity (GO:0004022);|Molecular Function: zinc ion binding (GO:0008270);|Biological Process: ethanol biosynthetic process involved in glucose fermentation to ethanol (GO:0043458);	cama:F384_04835	K13953	adhP	alcohol dehydrogenase, propanol-preferring [EC:1.1.1.1]	ko00010,ko00071,ko00350,ko00625,ko00626,ko00830,ko00980,ko00982	Glycolysis / Gluconeogenesis|Fatty acid degradation|Tyrosine metabolism|Chloroalkane and chloroalkene degradation|Naphthalene degradation|Retinol metabolism|Metabolism of xenobiotics by cytochrome P450|Drug metabolism - cytochrome P450	SP0285	COG1064	Zn-dependent alcohol dehydrogenases	[R]
MG bin.1
gene1644 1690229 1691275 k141_314414_length_15657_cov_13.0090_14 11318 12364	WP_095095926.1	MULTISPECIES: alcohol dehydrogenase AdhP [Enterobacteriaceae]	P20368.2	RecName: Full=Alcohol dehydrogenase 1; AltName: Full=Alcohol dehydrogenase I; Short=ADH I	Molecular Function: alcohol dehydrogenase (NAD) activity (GO:0004022);|Molecular Function: zinc ion binding (GO:0008270);|Biological Process: ethanol biosynthetic process involved in glucose fermentation to ethanol (GO:0043458);	cama:F384_04835	K13953	adhP	alcohol dehydrogenase, propanol-preferring [EC:1.1.1.1]	ko00010,ko00071,ko00350,ko00625,ko00626,ko00830,ko00980,ko00982	Glycolysis / Gluconeogenesis|Fatty acid degradation|Tyrosine metabolism|Chloroalkane and chloroalkene degradation|Naphthalene degradation|Retinol metabolism|Metabolism of xenobiotics by cytochrome P450|Drug metabolism - cytochrome P450	SP0285	COG1064	Zn-dependent alcohol dehydrogenases	[R]
gene2592 2625100 2624090 k141_330923_length_11760_cov_12.0000_6 6548 5538	WP_045855299.1	alcohol dehydrogenase AdhP [Raoultella terrigena]	P39451.1	RecName: Full=Alcohol dehydrogenase, propanol-preferring	Molecular Function: alcohol dehydrogenase (NAD) activity (GO:0004022);|Biological Process: cellular response to DNA damage stimulus (GO:0006974);|Molecular Function: zinc ion binding (GO:0008270);|Biological Process: response to ethanol (GO:0045471);|Biological Process: acetaldehyde catabolic process (GO:0046187);	ron:TE10_13910	K13953	adhP	alcohol dehydrogenase, propanol-preferring [EC:1.1.1.1]	ko00010,ko00071,ko00350,ko00625,ko00626,ko00830,ko00980,ko00982	Glycolysis / Gluconeogenesis|Fatty acid degradation|Tyrosine metabolism|Chloroalkane and chloroalkene degradation|Naphthalene degradation|Retinol metabolism|Metabolism of xenobiotics by cytochrome P450|Drug metabolism - cytochrome P450	STM1567	COG1064	Zn-dependent alcohol dehydrogenases	[R]
PHG bin.4
gene0265 257049 256039 k141_368691_length_22283_cov_128.9968_5 4856 3846	WP_045855299.1	alcohol dehydrogenase AdhP [Raoultella terrigena]	P39451.1	RecName: Full=Alcohol dehydrogenase, propanol-preferring	Molecular Function: alcohol dehydrogenase (NAD) activity (GO:0004022);|Biological Process: cellular response to DNA damage stimulus (GO:0006974);|Molecular Function: zinc ion binding (GO:0008270);|Biological Process: response to ethanol (GO:0045471);|Biological Process: acetaldehyde catabolic process (GO:0046187);	ron:TE10_13910	K13953	adhP	alcohol dehydrogenase, propanol-preferring [EC:1.1.1.1]	ko00010,ko00071,ko00350,ko00625,ko00626,ko00830,ko00980,ko00982	Glycolysis / Gluconeogenesis|Fatty acid degradation|Tyrosine metabolism|Chloroalkane and chloroalkene degradation|Naphthalene degradation|Retinol metabolism|Metabolism of xenobiotics by cytochrome P450|Drug metabolism - cytochrome P450	STM1567	COG1064	Zn-dependent alcohol dehydrogenases	[R]
gene2026 2085079 2086113 k141_118586_length_7798_cov_86.4122 2 1036	WP_095095926.1	MULTISPECIES: alcohol dehydrogenase AdhP [Enterobacteriaceae]	P20368.2	RecName: Full=Alcohol dehydrogenase 1; AltName: Full=Alcohol dehydrogenase I; Short=ADH I	Molecular Function: alcohol dehydrogenase (NAD) activity (GO:0004022);|Molecular Function: zinc ion binding (GO:0008270);|Biological Process: ethanol biosynthetic process involved in glucose fermentation to ethanol (GO:0043458);	cama:F384_04835	K13953	adhP	alcohol dehydrogenase, propanol-preferring [EC:1.1.1.1]	ko00010,ko00071,ko00350,ko00625,ko00626,ko00830,ko00980,ko00982	Glycolysis / Gluconeogenesis|Fatty acid degradation|Tyrosine metabolism|Chloroalkane and chloroalkene degradation|Naphthalene degradation|Retinol metabolism|Metabolism of xenobiotics by cytochrome P450|Drug metabolism - cytochrome P450	SP0285	COG1064	Zn-dependent alcohol dehydrogenases	[R]
AHG_bin.1
gene4677 5011833 5012882 k141_275737_length_7823_cov_54.0012_3 1894 2943	WP_095102565.1	MULTISPECIES: NAD(P)-dependent alcohol dehydrogenase [Enterobacteriaceae]	P75691.1	RecName: Full=Aldehyde reductase YahK; AltName: Full=Zinc-dependent alcohol dehydrogenase YahK	Molecular Function: alcohol dehydrogenase (NADP+) activity (GO:0008106);|Molecular Function: zinc ion binding (GO:0008270);	ron:TE10_01880	K13979	yahK	uncharacterized zinc-type alcohol dehydrogenase-like protein [EC:1.-.-.-]			yahK	COG1064	Zn-dependent alcohol dehydrogenases	[R]
AHG bin.4
gene1367 1501902 1502558 k141_306159_length_12082_cov_69.5129 3 659	WP_095848618.1	NAD(P)-dependent alcohol dehydrogenase [Gibbsiella quercinecans]	P75691.1	RecName: Full=Aldehyde reductase YahK; AltName: Full=Zinc-dependent alcohol dehydrogenase YahK	Molecular Function: alcohol dehydrogenase (NADP+) activity (GO:0008106);|Molecular Function: zinc ion binding (GO:0008270);	rah:Rahaq_1924	K13979	yahK	uncharacterized zinc-type alcohol dehydrogenase-like protein [EC:1.-.-.-]			PA2275	COG1064	Zn-dependent alcohol dehydrogenases	[R]
gene2596 2766526 2766185 k141_436055_length_6446_cov_42.0000 344 3	WP_095848618.1	NAD(P)-dependent alcohol dehydrogenase [Gibbsiella quercinecans]	O82515.1	RecName: Full=Probable mannitol dehydrogenase; AltName: Full=NAD-dependent mannitol dehydrogenase	Molecular Function: zinc ion binding (GO:0008270);|Molecular Function: mannitol dehydrogenase activity (GO:0046029);	raq:Rahaq2_2637	K13979	yahK	uncharacterized zinc-type alcohol dehydrogenase-like protein [EC:1.-.-.-]			PA2275	COG1064	Zn-dependent alcohol dehydrogenases	[R]
gene2668 2827799 2828854 k141_514892_length_6231_cov_54.5787_8 4623 5678	WP_095844590.1	NAD(P)-dependent alcohol dehydrogenase [Gibbsiella quercinecans]	P75691.1	RecName: Full=Aldehyde reductase YahK; AltName: Full=Zinc-dependent alcohol dehydrogenase YahK	Molecular Function: alcohol dehydrogenase (NADP+) activity (GO:0008106);|Molecular Function: zinc ion binding (GO:0008270);	kin:AB182_10435	K13979	yahK	uncharacterized zinc-type alcohol dehydrogenase-like protein [EC:1.-.-.-]			XF1734	COG1064	Zn-dependent alcohol dehydrogenases	[R]
MG bin.1
gene2557 2589760 2590809 k141_197280_length_11920_cov_25.0000_8 6815 7864	WP_095102565.1	MULTISPECIES: NAD(P)-dependent alcohol dehydrogenase [Enterobacteriaceae]	P75691.1	RecName: Full=Aldehyde reductase YahK; AltName: Full=Zinc-dependent alcohol dehydrogenase YahK	Molecular Function: alcohol dehydrogenase (NADP+) activity (GO:0008106);|Molecular Function: zinc ion binding (GO:0008270);	ron:TE10_01880	K13979	yahK	uncharacterized zinc-type alcohol dehydrogenase-like protein [EC:1.-.-.-]			yahK	COG1064	Zn-dependent alcohol dehydrogenases	[R]
PHG bin.2
gene0566 642603 641551 k141_744054_length_688130_cov_29.4006_566 642603 641551	SBW06955.1	putative oxidoreductase, Zn-dependent and NAD(P)-binding [uncultured Dysgonomonas sp.]	P0CH36.1	RecName: Full=NADP-dependent alcohol dehydrogenase C 1; Short=Ms-ADHC 1	Molecular Function: alcohol dehydrogenase (NADP+) activity (GO:0008106);|Molecular Function: zinc ion binding (GO:0008270);	puv:PUV_17810	K13979	yahK	uncharacterized zinc-type alcohol dehydrogenase-like protein [EC:1.-.-.-]			AGc2867	COG1064	Zn-dependent alcohol dehydrogenases	[R]
gene1092 1259387 1259716 k141_242411_length_405321_cov_26.7078_155 155319 155648	KGO90977.1	hypothetical protein Q766_20540 [Flavobacterium subsaxonicum WB 4.1-42 = DSM 21790]				scn:Solca_3678	K13979	yahK	uncharacterized zinc-type alcohol dehydrogenase-like protein [EC:1.-.-.-]			XF1136	COG1064	Zn-dependent alcohol dehydrogenases	[R]
PHG bin.4
gene4716 4589196 4588147 k141_34895_length_1737_cov_609.8816_3 1592 543	WP_095102565.1	MULTISPECIES: NAD(P)-dependent alcohol dehydrogenase [Enterobacteriaceae]	P75691.1	RecName: Full=Aldehyde reductase YahK; AltName: Full=Zinc-dependent alcohol dehydrogenase YahK	Molecular Function: alcohol dehydrogenase (NADP+) activity (GO:0008106);|Molecular Function: zinc ion binding (GO:0008270);	ron:TE10_01880	K13979	yahK	uncharacterized zinc-type alcohol dehydrogenase-like protein [EC:1.-.-.-]			yahK	COG1064	Zn-dependent alcohol dehydrogenases	[R]
PHG bin.6
gene6165 5536620 5536769 k141_159791_length_2598_cov_173.5710_4 2447 2596	WP_121552680.1	NAD(P)-dependent alcohol dehydrogenase [Gibbsiella quercinecans]	O82515.1	RecName: Full=Probable mannitol dehydrogenase; AltName: Full=NAD-dependent mannitol dehydrogenase	Molecular Function: zinc ion binding (GO:0008270);|Molecular Function: mannitol dehydrogenase activity (GO:0046029);	raa:Q7S_09785	K13979	yahK	uncharacterized zinc-type alcohol dehydrogenase-like protein [EC:1.-.-.-]			PA2275	COG1064	Zn-dependent alcohol dehydrogenases	[R]
a-Xylosidase
AHG.bin.1
gene2741 2959616 2961295 k141_75800_length_29461_cov_40.3015_23 26691 28370	WP_095100468.1	MULTISPECIES: glycoside hydrolase family 43 protein [Enterobacteriaceae]	P94489.2	RecName: Full=Beta-xylosidase; AltName: Full=1,4-beta-D-xylan xylohydrolase; AltName: Full=Xylan 1,4-beta-xylosidase	Cellular Component: plasma membrane (GO:0005886);|Molecular Function: xylan 1,4-beta-xylosidase activity (GO:0009044);|Biological Process: xylan catabolic process (GO:0045493);	ron:TE10_20585	K01198	xynB	xylan 1,4-beta-xylosidase [EC:3.2.1.37]	ko00520	Amino sugar and nucleotide sugar metabolism	L0234	COG3507	Beta-xylosidase	[G]
gene3749 4024142 4025758 k141_75080_length_19218_cov_44.8542_9 9726 11342	WP_095104239.1	MULTISPECIES: glycoside hydrolase family 43 protein [Enterobacteriaceae]	P77713.1	RecName: Full=Putative beta-xylosidase; AltName: Full=1,4-beta-D-xylan xylohydrolase; AltName: Full=Xylan 1,4-beta-xylosidase	Molecular Function: xylan 1,4-beta-xylosidase activity (GO:0009044);|Biological Process: xylan catabolic process (GO:0045493);	ron:TE10_04895	K01198	xynB	xylan 1,4-beta-xylosidase [EC:3.2.1.37]	ko00520	Amino sugar and nucleotide sugar metabolism	yagH	COG3507	Beta-xylosidase	[G]
AHG.bin.4
gene0257 296885 295206 k141_57642_length_26285_cov_30.5800 1849 170	WP_008915423.1	family 43 glycosylhydrolase [Providencia sneebia]	P94489.2	RecName: Full=Beta-xylosidase; AltName: Full=1,4-beta-D-xylan xylohydrolase; AltName: Full=Xylan 1,4-beta-xylosidase	Cellular Component: plasma membrane (GO:0005886);|Molecular Function: xylan 1,4-beta-xylosidase activity (GO:0009044);|Biological Process: xylan catabolic process (GO:0045493);	pec:W5S_2478	K01198	xynB	xylan 1,4-beta-xylosidase [EC:3.2.1.37]	ko00520	Amino sugar and nucleotide sugar metabolism	BH3683	COG3507	Beta-xylosidase	[G]
FG.bin.1
gene3277 3482553 3484169 k141_17346_length_10175_cov_66.0115_2 638 2254	WP_095104239.1	MULTISPECIES: glycoside hydrolase family 43 protein [Enterobacteriaceae]	P77713.1	RecName: Full=Putative beta-xylosidase; AltName: Full=1,4-beta-D-xylan xylohydrolase; AltName: Full=Xylan 1,4-beta-xylosidase	Molecular Function: xylan 1,4-beta-xylosidase activity (GO:0009044);|Biological Process: xylan catabolic process (GO:0045493);	ron:TE10_04895	K01198	xynB	xylan 1,4-beta-xylosidase [EC:3.2.1.37]	ko00520	Amino sugar and nucleotide sugar metabolism	yagH	COG3507	Beta-xylosidase	[G]
MG.bin.1
gene2914 2914332 2913232 k141_87677_length_10870_cov_9.0000 1103 3	WP_095100468.1	MULTISPECIES: glycoside hydrolase family 43 protein [Enterobacteriaceae]	P07129.2	RecName: Full=Beta-xylosidase; AltName: Full=1,4-beta-D-xylan xylohydrolase; AltName: Full=Xylan 1,4-beta-xylosidase	Molecular Function: xylan 1,4-beta-xylosidase activity (GO:0009044);|Biological Process: xylan catabolic process (GO:0045493);	ron:TE10_20585	K01198	xynB	xylan 1,4-beta-xylosidase [EC:3.2.1.37]	ko00520	Amino sugar and nucleotide sugar metabolism	L0234	COG3507	Beta-xylosidase	[G]
gene3417 3437007 3438623 k141_266720_length_9201_cov_23.8115_3 1903 3519	WP_095104239.1	MULTISPECIES: glycoside hydrolase family 43 protein [Enterobacteriaceae]	P77713.1	RecName: Full=Putative beta-xylosidase; AltName: Full=1,4-beta-D-xylan xylohydrolase; AltName: Full=Xylan 1,4-beta-xylosidase	Molecular Function: xylan 1,4-beta-xylosidase activity (GO:0009044);|Biological Process: xylan catabolic process (GO:0045493);	ron:TE10_04895	K01198	xynB	xylan 1,4-beta-xylosidase [EC:3.2.1.37]	ko00520	Amino sugar and nucleotide sugar metabolism	yagH	COG3507	Beta-xylosidase	[G]
PHG.bin.2
gene0595 683924 685510 k141_744054_length_688130_cov_29.4006_595 683924 685510	WP_006842477.1	glycoside hydrolase family 43 protein [Dysgonomonas mossii]	A7LXT8.1	RecName: Full=Non-reducing end alpha-L-arabinofuranosidase BoGH43A; AltName: Full=Glycosyl hydrolase family protein 43A; Short=BoGH43A; Flags: Precursor	Cellular Component: periplasmic space (GO:0042597);|Molecular Function: alpha-L-arabinofuranosidase activity (GO:0046556);|Biological Process: symbiont process benefiting host (GO:0085030);|Biological Process: xyloglucan catabolic process (GO:2000899);	shg:Sph21_2647	K01198	xynB	xylan 1,4-beta-xylosidase [EC:3.2.1.37]	ko00520	Amino sugar and nucleotide sugar metabolism	CC2802	COG3507	Beta-xylosidase	[G]
gene2382 2751452 2753212 k141_776106_length_206780_cov_29.5341_157 196334 198094	SBW06516.1	conserved exported hypothetical protein [uncultured Dysgonomonas sp.]				scn:Solca_3673	K01198	xynB	xylan 1,4-beta-xylosidase [EC:3.2.1.37]	ko00520	Amino sugar and nucleotide sugar metabolism
PHG.bin.4
gene4818 4678110 4677142 k141_155429_length_1560_cov_176.9915_2 1558 590	WP_095104239.1	MULTISPECIES: glycoside hydrolase family 43 protein [Enterobacteriaceae]	P77713.1	RecName: Full=Putative beta-xylosidase; AltName: Full=1,4-beta-D-xylan xylohydrolase; AltName: Full=Xylan 1,4-beta-xylosidase	Molecular Function: xylan 1,4-beta-xylosidase activity (GO:0009044);|Biological Process: xylan catabolic process (GO:0045493);	ron:TE10_04895	K01198	xynB	xylan 1,4-beta-xylosidase [EC:3.2.1.37]	ko00520	Amino sugar and nucleotide sugar metabolism	yagH	COG3507	Beta-xylosidase	[G]
gene5084 4993995 4993210 k141_630580_length_1033_cov_63.8565 787 2	WP_159867393.1	MULTISPECIES: family 43 glycosylhydrolase [unclassified Raoultella]	P77713.1	RecName: Full=Putative beta-xylosidase; AltName: Full=1,4-beta-D-xylan xylohydrolase; AltName: Full=Xylan 1,4-beta-xylosidase	Molecular Function: xylan 1,4-beta-xylosidase activity (GO:0009044);|Biological Process: xylan catabolic process (GO:0045493);	ron:TE10_04895	K01198	xynB	xylan 1,4-beta-xylosidase [EC:3.2.1.37]	ko00520	Amino sugar and nucleotide sugar metabolism	yagH	COG3507	Beta-xylosidase	[G]
AHG.bin.1
gene1720 1880031 1882094 k141_181868_length_42114_cov_42.7815_16 18675 20738	WP_100663080.1	glycoside hydrolase family 31 protein [Raoultella ornithinolytica]	Q01336.1	RecName: Full=Uncharacterized family 31 glucosidase ORF2	Molecular Function: hydrolase activity, hydrolyzing O-glycosyl compounds (GO:0004553);|Biological Process: carbohydrate metabolic process (GO:0005975);|Molecular Function: carbohydrate binding (GO:0030246);	rah:Rahaq_4631	K01811	xylS, yicI	alpha-D-xyloside xylohydrolase [EC:3.2.1.177]			STM0041	COG1501	Alpha-glucosidases, family 31 of glycosyl hydrolases	[G]
FG.bin.1
gene1179 1253919 1255982 k141_136339_length_25084_cov_68.2268_14 16777 18840	WP_100663080.1	glycoside hydrolase family 31 protein [Raoultella ornithinolytica]	Q01336.1	RecName: Full=Uncharacterized family 31 glucosidase ORF2	Molecular Function: hydrolase activity, hydrolyzing O-glycosyl compounds (GO:0004553);|Biological Process: carbohydrate metabolic process (GO:0005975);|Molecular Function: carbohydrate binding (GO:0030246);	rah:Rahaq_4631	K01811	xylS, yicI	alpha-D-xyloside xylohydrolase [EC:3.2.1.177]			STM0041	COG1501	Alpha-glucosidases, family 31 of glycosyl hydrolases	[G]
PHG.bin.2
gene1556 1779464 1782301 k141_700252_length_295465_cov_28.0013_260 270075 272912	WP_006797802.1	DUF5110 domain-containing protein [Dysgonomonas gadei]	A7LXT0.1	RecName: Full=Alpha-xylosidase BoGH31A; AltName: Full=Glycosyl hydrolase family protein 31A; Short=BoGH31A; Flags: Precursor	Molecular Function: hydrolase activity, hydrolyzing O-glycosyl compounds (GO:0004553);|Cellular Component: plasma membrane (GO:0005886);|Molecular Function: carbohydrate binding (GO:0030246);|Molecular Function: alpha-D-xyloside xylohydrolase (GO:0061634);|Biological Process: symbiont process benefiting host (GO:0085030);|Biological Process: xyloglucan catabolic process (GO:2000899);	ppn:Palpr_2124	K01811	xylS, yicI	alpha-D-xyloside xylohydrolase [EC:3.2.1.177]			CC0789	COG1501	Alpha-glucosidases, family 31 of glycosyl hydrolases	[G]
Arabinosidase
AHG.bin.1
gene0007 6613 8058 k141_240511_length_63805_cov_12.9821_7 6613 8058	EEV33691.1	alpha-L-arabinosidase [Enterococcus gallinarum EG2]	P94552.2	RecName: Full=Intracellular exo-alpha-L-arabinofuranosidase 2; Short=ABF; AltName: Full=Intracellular arabinan exo-alpha-L-arabinosidase; Short=Arabinosidase	Cellular Component: cytoplasm (GO:0005737);|Biological Process: arabinan catabolic process (GO:0031222);|Biological Process: L-arabinose metabolic process (GO:0046373);|Molecular Function: alpha-L-arabinofuranosidase activity (GO:0046556);	ecas:ECBG_01575	K01209	abfA	alpha-L-arabinofuranosidase [EC:3.2.1.55]	ko00520	Amino sugar and nucleotide sugar metabolism	BH1874	COG3534	Alpha-L-arabinofuranosidase	[G]
PHG.bin.9
gene0134 153819 152374 k141_100344_length_194376_cov_49.1434_134 153819 152374	EEV33691.1	alpha-L-arabinosidase [Enterococcus gallinarum EG2]	P94552.2	RecName: Full=Intracellular exo-alpha-L-arabinofuranosidase 2; Short=ABF; AltName: Full=Intracellular arabinan exo-alpha-L-arabinosidase; Short=Arabinosidase	Cellular Component: cytoplasm (GO:0005737);|Biological Process: arabinan catabolic process (GO:0031222);|Biological Process: L-arabinose metabolic process (GO:0046373);|Molecular Function: alpha-L-arabinofuranosidase activity (GO:0046556);	ecas:ECBG_01575	K01209	abfA	alpha-L-arabinofuranosidase [EC:3.2.1.55]	ko00520	Amino sugar and nucleotide sugar metabolism	BH1874	COG3534	Alpha-L-arabinofuranosidase	[G]
Galactosidase
AHG.bin.1
gene0303 318491 316368 k141_372894_length_79967_cov_98.2407_78 72435 70312	WP_095105334.1	MULTISPECIES: alpha-galactosidase [Enterobacteriaceae]	P16551.1	RecName: Full=Alpha-galactosidase; AltName: Full=Melibiase	Biological Process: carbohydrate metabolic process (GO:0005975);|Molecular Function: raffinose alpha-galactosidase activity (GO:0052692);	ron:TE10_02650	K07407	E3.2.1.22B, galA, rafA	alpha-galactosidase [EC:3.2.1.22]	ko00052,ko00561,ko00600,ko00603	Galactose metabolism|Glycerolipid metabolism|Sphingolipid metabolism|Glycosphingolipid biosynthesis - globo and isoglobo series	YPO1581	COG3345	Alpha-galactosidase	[G]
AHG.bin.4
gene1212 1335057 1332931 k141_361150_length_12899_cov_57.8533_7 8641 6515	WP_095846467.1	alpha-galactosidase [Gibbsiella quercinecans]	P16551.1	RecName: Full=Alpha-galactosidase; AltName: Full=Melibiase	Biological Process: carbohydrate metabolic process (GO:0005975);|Molecular Function: raffinose alpha-galactosidase activity (GO:0052692);	sfw:WN53_08090	K07407	E3.2.1.22B, galA, rafA	alpha-galactosidase [EC:3.2.1.22]	ko00052,ko00561,ko00600,ko00603	Galactose metabolism|Glycerolipid metabolism|Sphingolipid metabolism|Glycosphingolipid biosynthesis - globo and isoglobo series	YPO1581	COG3345	Alpha-galactosidase	[G]
AHG.bin.5
gene2910 3023440 3021866 k141_167034_length_4422_cov_38.0000_2 2457 883	WP_126017303.1	hypothetical protein [Paenibacillus albus]				rum:CK1_15360	K07407	E3.2.1.22B, galA, rafA	alpha-galactosidase [EC:3.2.1.22]	ko00052,ko00561,ko00600,ko00603	Galactose metabolism|Glycerolipid metabolism|Sphingolipid metabolism|Glycosphingolipid biosynthesis - globo and isoglobo series
gene2925 3036765 3035047 k141_231844_length_4407_cov_9.0000_2 2527 809	WP_125604900.1	alpha-galactosidase [Lactobacillus sp. 54-5]				pgm:PGRAT_15210	K07407	E3.2.1.22B, galA, rafA	alpha-galactosidase [EC:3.2.1.22]	ko00052,ko00561,ko00600,ko00603	Galactose metabolism|Glycerolipid metabolism|Sphingolipid metabolism|Glycosphingolipid biosynthesis - globo and isoglobo series
FG.bin.1
gene1469 1564922 1567045 k141_224786_length_21865_cov_59.7535_3 1564 3687	WP_095105334.1	MULTISPECIES: alpha-galactosidase [Enterobacteriaceae]	P16551.1	RecName: Full=Alpha-galactosidase; AltName: Full=Melibiase	Biological Process: carbohydrate metabolic process (GO:0005975);|Molecular Function: raffinose alpha-galactosidase activity (GO:0052692);	ron:TE10_02650	K07407	E3.2.1.22B, galA, rafA	alpha-galactosidase [EC:3.2.1.22]	ko00052,ko00561,ko00600,ko00603	Galactose metabolism|Glycerolipid metabolism|Sphingolipid metabolism|Glycosphingolipid biosynthesis - globo and isoglobo series	YPO1581	COG3345	Alpha-galactosidase	[G]
PHG.bin.2
gene0581 668246 666051 k141_744054_length_688130_cov_29.4006_581 668246 666051	WP_029902519.1	alpha-galactosidase [Prevotella sp. 10(H)]	Q9ALJ4.1	RecName: Full=Alpha-galactosidase AgaA	Molecular Function: alpha-galactosidase activity (GO:0004557);|Biological Process: stachyose metabolic process (GO:0033531);|Biological Process: raffinose catabolic process (GO:0034484);|Biological Process: protein homotetramerization (GO:0051289);|Molecular Function: raffinose alpha-galactosidase activity (GO:0052692);	pdi:BDI_0089	K07407	E3.2.1.22B, galA, rafA	alpha-galactosidase [EC:3.2.1.22]	ko00052,ko00561,ko00600,ko00603	Galactose metabolism|Glycerolipid metabolism|Sphingolipid metabolism|Glycosphingolipid biosynthesis - globo and isoglobo series	BH2223	COG3345	Alpha-galactosidase	[G]
gene1090 1257232 1256981 k141_242411_length_405321_cov_26.7078_153 153164 152913	WP_151852410.1	family 10 glycosylhydrolase [Bacteroides uniformis]				bcel:BcellWH2_00425	K07407	E3.2.1.22B, galA, rafA	alpha-galactosidase [EC:3.2.1.22]	ko00052,ko00561,ko00600,ko00603	Galactose metabolism|Glycerolipid metabolism|Sphingolipid metabolism|Glycosphingolipid biosynthesis - globo and isoglobo series
PHG.bin.4
gene1637 1672706 1674829 k141_372559_length_9899_cov_84.4432_10 7408 9531	WP_095105334.1	MULTISPECIES: alpha-galactosidase [Enterobacteriaceae]	P16551.1	RecName: Full=Alpha-galactosidase; AltName: Full=Melibiase	Biological Process: carbohydrate metabolic process (GO:0005975);|Molecular Function: raffinose alpha-galactosidase activity (GO:0052692);	ron:TE10_02650	K07407	E3.2.1.22B, galA, rafA	alpha-galactosidase [EC:3.2.1.22]	ko00052,ko00561,ko00600,ko00603	Galactose metabolism|Glycerolipid metabolism|Sphingolipid metabolism|Glycosphingolipid biosynthesis - globo and isoglobo series	YPO1581	COG3345	Alpha-galactosidase	[G]
PHG.bin.6
gene0738 693937 691814 k141_745156_length_17468_cov_22.2545_7 7524 5401	WP_153742171.1	alpha-galactosidase [Kluyvera intermedia]	P16551.1	RecName: Full=Alpha-galactosidase; AltName: Full=Melibiase	Biological Process: carbohydrate metabolic process (GO:0005975);|Molecular Function: raffinose alpha-galactosidase activity (GO:0052692);	koe:A225_0045	K07407	E3.2.1.22B, galA, rafA	alpha-galactosidase [EC:3.2.1.22]	ko00052,ko00561,ko00600,ko00603	Galactose metabolism|Glycerolipid metabolism|Sphingolipid metabolism|Glycosphingolipid biosynthesis - globo and isoglobo series	YPO1581	COG3345	Alpha-galactosidase	[G]
PHG.bin.9
gene0462 536504 538078 k141_604993_length_61791_cov_37.9217_13 14676 16250	WP_126017303.1	hypothetical protein [Paenibacillus albus]				rum:CK1_15360	K07407	E3.2.1.22B, galA, rafA	alpha-galactosidase [EC:3.2.1.22]	ko00052,ko00561,ko00600,ko00603	Galactose metabolism|Glycerolipid metabolism|Sphingolipid metabolism|Glycosphingolipid biosynthesis - globo and isoglobo series
gene0542 632330 630093 k141_356714_length_57715_cov_44.9815_40 48711 46474	WP_102866391.1	alpha-galactosidase [Enterococcus avium]	Q9ALJ4.1	RecName: Full=Alpha-galactosidase AgaA	Molecular Function: alpha-galactosidase activity (GO:0004557);|Biological Process: stachyose metabolic process (GO:0033531);|Biological Process: raffinose catabolic process (GO:0034484);|Biological Process: protein homotetramerization (GO:0051289);|Molecular Function: raffinose alpha-galactosidase activity (GO:0052692);	ecas:ECBG_00361	K07407	E3.2.1.22B, galA, rafA	alpha-galactosidase [EC:3.2.1.22]	ko00052,ko00561,ko00600,ko00603	Galactose metabolism|Glycerolipid metabolism|Sphingolipid metabolism|Glycosphingolipid biosynthesis - globo and isoglobo series	BH2223	COG3345	Alpha-galactosidase	[G]
gene0625 729755 731473 k141_123829_length_50069_cov_33.7553_36 34976 36694	WP_125604900.1	alpha-galactosidase [Lactobacillus sp. 54-5]				pgm:PGRAT_15210	K07407	E3.2.1.22B, galA, rafA	alpha-galactosidase [EC:3.2.1.22]	ko00052,ko00561,ko00600,ko00603	Galactose metabolism|Glycerolipid metabolism|Sphingolipid metabolism|Glycosphingolipid biosynthesis - globo and isoglobo series
AHG.bin.1
gene1520 1655168 1653822 k141_79501_length_46406_cov_47.7690_18 19327 17981	WP_095104497.1	MULTISPECIES: alpha-glucosidase/alpha-galactosidase [Enterobacteriaceae]	P30877.2	RecName: Full=Alpha-galactosidase; AltName: Full=Melibiase	Biological Process: carbohydrate metabolic process (GO:0005975);|Molecular Function: oxidoreductase activity, acting on the CH-OH group of donors, NAD or NADP as acceptor (GO:0016616);|Molecular Function: metal ion binding (GO:0046872);|Molecular Function: raffinose alpha-galactosidase activity (GO:0052692);	ron:TE10_04165	K07406	melA	alpha-galactosidase [EC:3.2.1.22]	ko00052,ko00561,ko00600,ko00603	Galactose metabolism|Glycerolipid metabolism|Sphingolipid metabolism|Glycosphingolipid biosynthesis - globo and isoglobo series	STM4298	COG1486	Alpha-galactosidases/6-phospho-beta-glucosidases, family 4 of glycosyl hydrolases	[G]
FG.bin.1
gene4028 4231963 4232121 k141_155129_length_6841_cov_71.0000_9 6681 6839	WP_095104497.1	MULTISPECIES: alpha-glucosidase/alpha-galactosidase [Enterobacteriaceae]	P06720.1	RecName: Full=Alpha-galactosidase; AltName: Full=Melibiase	Molecular Function: alpha-galactosidase activity (GO:0004557);|Cellular Component: cytosol (GO:0005829);|Biological Process: melibiose catabolic process (GO:0005995);|Molecular Function: oxidoreductase activity, acting on the CH-OH group of donors, NAD or NADP as acceptor (GO:0016616);|Molecular Function: manganese ion binding (GO:0030145);|Molecular Function: raffinose alpha-galactosidase activi…	ror:RORB6_16940	K07406	melA	alpha-galactosidase [EC:3.2.1.22]	ko00052,ko00561,ko00600,ko00603	Galactose metabolism|Glycerolipid metabolism|Sphingolipid metabolism|Glycosphingolipid biosynthesis - globo and isoglobo series	ECs5101	COG1486	Alpha-galactosidases/6-phospho-beta-glucosidases, family 4 of glycosyl hydrolases	[G]
gene4237 4431218 4432543 k141_400310_length_5883_cov_71.0263 2 1327	WP_095104497.1	MULTISPECIES: alpha-glucosidase/alpha-galactosidase [Enterobacteriaceae]	P30877.2	RecName: Full=Alpha-galactosidase; AltName: Full=Melibiase	Biological Process: carbohydrate metabolic process (GO:0005975);|Molecular Function: oxidoreductase activity, acting on the CH-OH group of donors, NAD or NADP as acceptor (GO:0016616);|Molecular Function: metal ion binding (GO:0046872);|Molecular Function: raffinose alpha-galactosidase activity (GO:0052692);	ron:TE10_04165	K07406	melA	alpha-galactosidase [EC:3.2.1.22]	ko00052,ko00561,ko00600,ko00603	Galactose metabolism|Glycerolipid metabolism|Sphingolipid metabolism|Glycosphingolipid biosynthesis - globo and isoglobo series	STM4298	COG1486	Alpha-galactosidases/6-phospho-beta-glucosidases, family 4 of glycosyl hydrolases	[G]
PHG.bin.4
gene2875 2903878 2902532 k141_170677_length_5800_cov_124.0000_5 3910 2564	WP_095104497.1	MULTISPECIES: alpha-glucosidase/alpha-galactosidase [Enterobacteriaceae]	P30877.2	RecName: Full=Alpha-galactosidase; AltName: Full=Melibiase	Biological Process: carbohydrate metabolic process (GO:0005975);|Molecular Function: oxidoreductase activity, acting on the CH-OH group of donors, NAD or NADP as acceptor (GO:0016616);|Molecular Function: metal ion binding (GO:0046872);|Molecular Function: raffinose alpha-galactosidase activity (GO:0052692);	ron:TE10_04165	K07406	melA	alpha-galactosidase [EC:3.2.1.22]	ko00052,ko00561,ko00600,ko00603	Galactose metabolism|Glycerolipid metabolism|Sphingolipid metabolism|Glycosphingolipid biosynthesis - globo and isoglobo series	STM4298	COG1486	Alpha-galactosidases/6-phospho-beta-glucosidases, family 4 of glycosyl hydrolases	[G]
PHG.bin.6
gene3837 3536692 3538038 k141_354821_length_5310_cov_13.8868_3 1400 2746	WP_004109389.1	MULTISPECIES: alpha-glucosidase/alpha-galactosidase [Klebsiella]	P30877.2	RecName: Full=Alpha-galactosidase; AltName: Full=Melibiase	Biological Process: carbohydrate metabolic process (GO:0005975);|Molecular Function: oxidoreductase activity, acting on the CH-OH group of donors, NAD or NADP as acceptor (GO:0016616);|Molecular Function: metal ion binding (GO:0046872);|Molecular Function: raffinose alpha-galactosidase activity (GO:0052692);	ror:RORB6_16940	K07406	melA	alpha-galactosidase [EC:3.2.1.22]	ko00052,ko00561,ko00600,ko00603	Galactose metabolism|Glycerolipid metabolism|Sphingolipid metabolism|Glycosphingolipid biosynthesis - globo and isoglobo series	STM4298	COG1486	Alpha-galactosidases/6-phospho-beta-glucosidases, family 4 of glycosyl hydrolases	[G]
Galactosidase
AHG.bin.1
gene1442 1565882 1562775 k141_147991_length_48608_cov_42.9482_24 26473 23366	WP_159236930.1	MULTISPECIES: beta-galactosidase [unclassified Raoultella]	A6T8X0.1	RecName: Full=Beta-galactosidase 1; Short=Beta-gal 1; AltName: Full=Lactase 1	Molecular Function: beta-galactosidase activity (GO:0004565);|Biological Process: carbohydrate metabolic process (GO:0005975);|Cellular Component: beta-galactosidase complex (GO:0009341);|Molecular Function: carbohydrate binding (GO:0030246);|Molecular Function: metal ion binding (GO:0046872);	ron:TE10_15560	K01190	lacZ	beta-galactosidase [EC:3.2.1.23]	ko00052,ko00511,ko00600	Galactose metabolism|Other glycan degradation|Sphingolipid metabolism	lacZ	COG3250	Beta-galactosidase/beta-glucuronidase	[G]
AHG.bin.4
gene1315 1432383 1435469 k141_219887_length_12492_cov_40.7717_6 4336 7422	WP_095844731.1	beta-galactosidase [Gibbsiella quercinecans]	A8GGN3.1	RecName: Full=Beta-galactosidase; Short=Beta-gal; AltName: Full=Lactase	Molecular Function: beta-galactosidase activity (GO:0004565);|Biological Process: carbohydrate metabolic process (GO:0005975);|Cellular Component: beta-galactosidase complex (GO:0009341);|Molecular Function: carbohydrate binding (GO:0030246);|Molecular Function: metal ion binding (GO:0046872);	slq:M495_16290	K01190	lacZ	beta-galactosidase [EC:3.2.1.23]	ko00052,ko00511,ko00600	Galactose metabolism|Other glycan degradation|Sphingolipid metabolism	YPO1654	COG3250	Beta-galactosidase/beta-glucuronidase	[G]
FG.bin.1
gene3400 3608702 3605595 k141_246195_length_9511_cov_69.0630_6 8994 5887	WP_159236930.1	MULTISPECIES: beta-galactosidase [unclassified Raoultella]	A6T8X0.1	RecName: Full=Beta-galactosidase 1; Short=Beta-gal 1; AltName: Full=Lactase 1	Molecular Function: beta-galactosidase activity (GO:0004565);|Biological Process: carbohydrate metabolic process (GO:0005975);|Cellular Component: beta-galactosidase complex (GO:0009341);|Molecular Function: carbohydrate binding (GO:0030246);|Molecular Function: metal ion binding (GO:0046872);	ron:TE10_15560	K01190	lacZ	beta-galactosidase [EC:3.2.1.23]	ko00052,ko00511,ko00600	Galactose metabolism|Other glycan degradation|Sphingolipid metabolism	lacZ	COG3250	Beta-galactosidase/beta-glucuronidase	[G]
PHG.bin.2
gene1557 1782518 1785025 k141_700252_length_295465_cov_28.0013_261 273129 275636	WP_006842488.1	glycoside hydrolase family 2 protein [Dysgonomonas mossii]	A7LXS9.1	RecName: Full=Beta-galactosidase BoGH2A; Short=Beta-gal; AltName: Full=Glycosyl hydrolase family protein 2A; Short=BoGH2A; Flags: Precursor	Molecular Function: beta-galactosidase activity (GO:0004565);|Cellular Component: plasma membrane (GO:0005886);|Biological Process: symbiont process benefiting host (GO:0085030);|Biological Process: xyloglucan catabolic process (GO:2000899);	ppn:Palpr_2137	K01190	lacZ	beta-galactosidase [EC:3.2.1.23]	ko00052,ko00511,ko00600	Galactose metabolism|Other glycan degradation|Sphingolipid metabolism	SP0648_2	COG3250	Beta-galactosidase/beta-glucuronidase	[G]
gene1673 1934518 1938099 k141_749982_length_284877_cov_30.1275_97 129664 133245	WP_122353194.1	DUF4981 domain-containing protein [Parabacteroides sp. AF14-59]	Q56307.2	RecName: Full=Beta-galactosidase; Short=Beta-gal; AltName: Full=Lactase	Molecular Function: beta-galactosidase activity (GO:0004565);|Biological Process: lactose catabolic process (GO:0005990);|Cellular Component: beta-galactosidase complex (GO:0009341);|Molecular Function: carbohydrate binding (GO:0030246);	zpr:ZPR_1541	K01190	lacZ	beta-galactosidase [EC:3.2.1.23]	ko00052,ko00511,ko00600	Galactose metabolism|Other glycan degradation|Sphingolipid metabolism	TM1193	COG3250	Beta-galactosidase/beta-glucuronidase	[G]
gene0642 756534 753412 k141_313111_length_415938_cov_34.1247_45 68404 65282	WP_080903334.1	DUF4981 domain-containing protein [Parabacteroides sp. Marseille-P3160]	Q56307.2	RecName: Full=Beta-galactosidase; Short=Beta-gal; AltName: Full=Lactase	Molecular Function: beta-galactosidase activity (GO:0004565);|Biological Process: lactose catabolic process (GO:0005990);|Cellular Component: beta-galactosidase complex (GO:0009341);|Molecular Function: carbohydrate binding (GO:0030246);	ppn:Palpr_0075	K01190	lacZ	beta-galactosidase [EC:3.2.1.23]	ko00052,ko00511,ko00600	Galactose metabolism|Other glycan degradation|Sphingolipid metabolism	TM1193	COG3250	Beta-galactosidase/beta-glucuronidase	[G]
PHG.bin.4
gene2259 2303161 2305968 k141_336644_length_7293_cov_226.3019 2 2809	WP_159236930.1	MULTISPECIES: beta-galactosidase [unclassified Raoultella]	B5XQY2.1	RecName: Full=Beta-galactosidase; Short=Beta-gal; AltName: Full=Lactase	Molecular Function: beta-galactosidase activity (GO:0004565);|Biological Process: carbohydrate metabolic process (GO:0005975);|Cellular Component: beta-galactosidase complex (GO:0009341);|Molecular Function: carbohydrate binding (GO:0030246);|Molecular Function: metal ion binding (GO:0046872);	ron:TE10_15560	K01190	lacZ	beta-galactosidase [EC:3.2.1.23]	ko00052,ko00511,ko00600	Galactose metabolism|Other glycan degradation|Sphingolipid metabolism	lacZ	COG3250	Beta-galactosidase/beta-glucuronidase	[G]
gene2580 2617253 2617876 k141_296634_length_6461_cov_119.4600_9 5837 6460	WP_132510186.1	beta-galactosidase [Raoultella ornithinolytica]	A6T8X0.1	RecName: Full=Beta-galactosidase 1; Short=Beta-gal 1; AltName: Full=Lactase 1	Molecular Function: beta-galactosidase activity (GO:0004565);|Biological Process: carbohydrate metabolic process (GO:0005975);|Cellular Component: beta-galactosidase complex (GO:0009341);|Molecular Function: carbohydrate binding (GO:0030246);|Molecular Function: metal ion binding (GO:0046872);	ron:TE10_15560	K01190	lacZ	beta-galactosidase [EC:3.2.1.23]	ko00052,ko00511,ko00600	Galactose metabolism|Other glycan degradation|Sphingolipid metabolism	ECs0397	COG3250	Beta-galactosidase/beta-glucuronidase	[G]
PHG.bin.6
gene3909 3591734 3588627 k141_677649_length_5229_cov_14.9603_2 3653 546	WP_125286385.1	beta-galactosidase [Klebsiella oxytoca]	A6T8X0.1	RecName: Full=Beta-galactosidase 1; Short=Beta-gal 1; AltName: Full=Lactase 1	Molecular Function: beta-galactosidase activity (GO:0004565);|Biological Process: carbohydrate metabolic process (GO:0005975);|Cellular Component: beta-galactosidase complex (GO:0009341);|Molecular Function: carbohydrate binding (GO:0030246);|Molecular Function: metal ion binding (GO:0046872);	koy:J415_16175	K01190	lacZ	beta-galactosidase [EC:3.2.1.23]	ko00052,ko00511,ko00600	Galactose metabolism|Other glycan degradation|Sphingolipid metabolism	lacZ	COG3250	Beta-galactosidase/beta-glucuronidase	[G]
AHG.bin.1
gene1195 1305208 1303169 k141_197190_length_50833_cov_38.2174_14 17104 15065	WP_095097491.1	MULTISPECIES: cellulase family glycosylhydrolase [Enterobacteriaceae]	Q5FJ41.1	RecName: Full=Beta-galactosidase LacZ; Short=Beta-gal	Molecular Function: beta-galactosidase activity (GO:0004565);|Biological Process: galactose metabolic process (GO:0006012);|Cellular Component: beta-galactosidase complex (GO:0009341);|Molecular Function: metal ion binding (GO:0046872);	pao:Pat9b_4620	K12308	bgaB, lacA	beta-galactosidase [EC:3.2.1.23]	ko00052	Galactose metabolism	TM1195	COG1874	Beta-galactosidase	[G]
gene3587 3856676 3858733 k141_111946_length_21101_cov_82.9880_5 5231 7288	WP_095097927.1	MULTISPECIES: beta-galactosidase [Enterobacteriaceae]	C8WV58.1	RecName: Full=Beta-galactosidase BglY; Short=Beta-gal	Molecular Function: beta-galactosidase activity (GO:0004565);|Biological Process: galactose metabolic process (GO:0006012);|Cellular Component: beta-galactosidase complex (GO:0009341);|Molecular Function: metal ion binding (GO:0046872);	kom:HR38_11665	K12308	bgaB, lacA	beta-galactosidase [EC:3.2.1.23]	ko00052	Galactose metabolism	YPO0852	COG1874	Beta-galactosidase	[G]
AHG.bin.4
gene1012 1115232 1117289 k141_362844_length_14359_cov_93.7112_7 6993 9050	WP_095846908.1	beta-galactosidase [Gibbsiella quercinecans]	C8WV58.1	RecName: Full=Beta-galactosidase BglY; Short=Beta-gal	Molecular Function: beta-galactosidase activity (GO:0004565);|Biological Process: galactose metabolic process (GO:0006012);|Cellular Component: beta-galactosidase complex (GO:0009341);|Molecular Function: metal ion binding (GO:0046872);	enr:H650_06315	K12308	bgaB, lacA	beta-galactosidase [EC:3.2.1.23]	ko00052	Galactose metabolism	YPO0852	COG1874	Beta-galactosidase	[G]
FG.bin.1
gene2108 2255108 2253051 k141_560286_length_16891_cov_70.0042_8 7737 5680	WP_095097927.1	MULTISPECIES: beta-galactosidase [Enterobacteriaceae]	C8WV58.1	RecName: Full=Beta-galactosidase BglY; Short=Beta-gal	Molecular Function: beta-galactosidase activity (GO:0004565);|Biological Process: galactose metabolic process (GO:0006012);|Cellular Component: beta-galactosidase complex (GO:0009341);|Molecular Function: metal ion binding (GO:0046872);	ron:TE10_07905	K12308	bgaB, lacA	beta-galactosidase [EC:3.2.1.23]	ko00052	Galactose metabolism	YPO0852	COG1874	Beta-galactosidase	[G]
gene2310 2469164 2467125 k141_112650_length_15674_cov_63.3301_9 10634 8595	WP_095097491.1	MULTISPECIES: cellulase family glycosylhydrolase [Enterobacteriaceae]	Q5FJ41.1	RecName: Full=Beta-galactosidase LacZ; Short=Beta-gal	Molecular Function: beta-galactosidase activity (GO:0004565);|Biological Process: galactose metabolic process (GO:0006012);|Cellular Component: beta-galactosidase complex (GO:0009341);|Molecular Function: metal ion binding (GO:0046872);	pao:Pat9b_4620	K12308	bgaB, lacA	beta-galactosidase [EC:3.2.1.23]	ko00052	Galactose metabolism	TM1195	COG1874	Beta-galactosidase	[G]
PHG.bin.2
gene0726 852160 854046 k141_313111_length_415938_cov_34.1247_129 164030 165916	WP_050699771.1	beta-galactosidase [Dysgonomonas sp. BGC7]	P48982.1	RecName: Full=Beta-galactosidase; Short=Lactase; Flags: Precursor	Molecular Function: beta-galactosidase activity (GO:0004565);|Biological Process: carbohydrate metabolic process (GO:0005975);	bfb:VU15_18075	K12308	bgaB, lacA	beta-galactosidase [EC:3.2.1.23]	ko00052	Galactose metabolism	XF0840	COG1874	Beta-galactosidase	[G]
PHG.bin.4
gene0788 800079 802136 k141_296411_length_14391_cov_89.6225_12 11619 13676	WP_095097927.1	MULTISPECIES: beta-galactosidase [Enterobacteriaceae]	C8WV58.1	RecName: Full=Beta-galactosidase BglY; Short=Beta-gal	Molecular Function: beta-galactosidase activity (GO:0004565);|Biological Process: galactose metabolic process (GO:0006012);|Cellular Component: beta-galactosidase complex (GO:0009341);|Molecular Function: metal ion binding (GO:0046872);	ron:TE10_07905	K12308	bgaB, lacA	beta-galactosidase [EC:3.2.1.23]	ko00052	Galactose metabolism	YPO0852	COG1874	Beta-galactosidase	[G]
gene2241 2287147 2288544 k141_150539_length_7317_cov_69.2435_8 5918 7315	WP_095097491.1	MULTISPECIES: cellulase family glycosylhydrolase [Enterobacteriaceae]	P94804.2	RecName: Full=Beta-galactosidase BgaH; Short=Beta-gal	Molecular Function: beta-galactosidase activity (GO:0004565);|Biological Process: galactose metabolic process (GO:0006012);|Cellular Component: beta-galactosidase complex (GO:0009341);|Molecular Function: metal ion binding (GO:0046872);	pao:Pat9b_4620	K12308	bgaB, lacA	beta-galactosidase [EC:3.2.1.23]	ko00052	Galactose metabolism	TM1195	COG1874	Beta-galactosidase	[G]
gene3375 3378252 3377473 k141_28621_length_4722_cov_60.7898_5 4721 3942	WP_095097491.1	MULTISPECIES: cellulase family glycosylhydrolase [Enterobacteriaceae]	C6H178.1	RecName: Full=Beta-galactosidase LacA; Short=Beta-gal	Molecular Function: beta-galactosidase activity (GO:0004565);|Biological Process: galactose metabolic process (GO:0006012);|Cellular Component: beta-galactosidase complex (GO:0009341);|Molecular Function: metal ion binding (GO:0046872);	pao:Pat9b_4620	K12308	bgaB, lacA	beta-galactosidase [EC:3.2.1.23]	ko00052	Galactose metabolism	BH2022	COG1874	Beta-galactosidase	[G]
PHG.bin.6
gene1626 1509484 1507475 k141_377994_length_10076_cov_20.5390_7 7139 5130	WP_098140247.1	MULTISPECIES: beta-galactosidase [Klebsiella]	D9SM34.1	RecName: Full=Beta-galactosidase BgaA; Short=Beta-gal; AltName: Full=Alpha-L-arabinopyranosidase	Molecular Function: beta-galactosidase activity (GO:0004565);|Biological Process: galactose metabolic process (GO:0006012);|Cellular Component: beta-galactosidase complex (GO:0009341);|Molecular Function: metal ion binding (GO:0046872);	kok:KONIH1_02695	K12308	bgaB, lacA	beta-galactosidase [EC:3.2.1.23]	ko00052	Galactose metabolism	YPO0852	COG1874	Beta-galactosidase	[G]
PHG.bin.9
gene0541 630057 628000 k141_356714_length_57715_cov_44.9815_39 46438 44381	WP_103299451.1	beta-galactosidase [Enterococcus gallinarum]	Q65CX4.2	RecName: Full=Beta-galactosidase GanA; Short=Beta-gal; AltName: Full=Beta-1,4-galactooligomerase; AltName: Full=Galactooligomerase	Molecular Function: beta-galactosidase activity (GO:0004565);|Biological Process: galactose metabolic process (GO:0006012);|Cellular Component: beta-galactosidase complex (GO:0009341);|Molecular Function: metal ion binding (GO:0046872);	ecas:ECBG_00362	K12308	bgaB, lacA	beta-galactosidase [EC:3.2.1.23]	ko00052	Galactose metabolism	BH2022	COG1874	Beta-galactosidase	[G]
PHG.bin.2
gene1089 1256914 1255055 k141_242411_length_405321_cov_26.7078_152 152846 150987	WP_165305977.1	galactosylceramidase [Sphingobacterium sp. DR205]	Q0VA39.1	RecName: Full=Galactocerebrosidase; Short=GALCERase; AltName: Full=Galactosylceramidase; Flags: Precursor	Molecular Function: galactosylceramidase activity (GO:0004336);|Cellular Component: lysosome (GO:0005764);|Biological Process: galactosylceramide catabolic process (GO:0006683);	bsa:Bacsa_1415	K01202	GALC	galactosylceramidase [EC:3.2.1.46]	ko00600,ko04142	Sphingolipid metabolism|Lysosome
AHG.bin.4
gene0059 72274 70874 k141_257365_length_45937_cov_15.4605_8 8469 7069	WP_104872363.1	6-phospho-beta-galactosidase [Enterococcus mundtii]	C7N8L9.1	RecName: Full=6-phospho-beta-galactosidase; AltName: Full=Beta-D-phosphogalactoside galactohydrolase; Short=PGALase; AltName: Full=P-beta-Gal; Short=PBG	Biological Process: lactose catabolic process (GO:0005990);|Molecular Function: galactosidase activity (GO:0015925);|Biological Process: lactose catabolic process via tagatose-6-phosphate (GO:0019512);|Molecular Function: 6-phospho-beta-galactosidase activity (GO:0033920);	emu:EMQU_1649	K01220	E3.2.1.85, lacG	6-phospho-beta-galactosidase [EC:3.2.1.85]	ko00052	Galactose metabolism	SP1184	COG2723	Beta-glucosidase/6-phospho-beta-glucosidase/beta-galactosidase	[G]
PHG.bin.9
gene1886 2104935 2106335 k141_68342_length_20147_cov_40.9008_3 1493 2893	WP_104872363.1	6-phospho-beta-galactosidase [Enterococcus mundtii]	C7N8L9.1	RecName: Full=6-phospho-beta-galactosidase; AltName: Full=Beta-D-phosphogalactoside galactohydrolase; Short=PGALase; AltName: Full=P-beta-Gal; Short=PBG	Biological Process: lactose catabolic process (GO:0005990);|Molecular Function: galactosidase activity (GO:0015925);|Biological Process: lactose catabolic process via tagatose-6-phosphate (GO:0019512);|Molecular Function: 6-phospho-beta-galactosidase activity (GO:0033920);	emu:EMQU_1649	K01220	E3.2.1.85, lacG	6-phospho-beta-galactosidase [EC:3.2.1.85]	ko00052	Galactose metabolism	SP1184	COG2723	Beta-glucosidase/6-phospho-beta-glucosidase/beta-galactosidase	[G]
AHG.bin.1
gene3586 3855343 3856545 k141_111946_length_21101_cov_82.9880_4 3898 5100	WP_095094466.1	MULTISPECIES: galactosidase [Enterobacteriaceae]	P48843.1	RecName: Full=Uncharacterized protein in bgaB 5'region; AltName: Full=ORF1	Biological Process: metabolic process (GO:0008152);|Molecular Function: glucosidase activity (GO:0015926);	ron:TE10_07900	K01224	E3.2.1.89	arabinogalactan endo-1,4-beta-galactosidase [EC:3.2.1.89]			YPO0853	COG3867	Arabinogalactan endo-1,4-beta-galactosidase	[G]
AHG.bin.4
gene1011 1114003 1115205 k141_362844_length_14359_cov_93.7112_6 5764 6966	WP_121553373.1	galactosidase [Gibbsiella quercinecans]	Q65CX5.1	RecName: Full=Arabinogalactan endo-beta-1,4-galactanase; AltName: Full=Endo-1,4-beta-galactanase; Short=Galactanase; Flags: Precursor	Biological Process: metabolic process (GO:0008152);|Molecular Function: glucosidase activity (GO:0015926);|Molecular Function: arabinogalactan endo-1,4-beta-galactosidase activity (GO:0031218);|Molecular Function: metal ion binding (GO:0046872);	kvd:KR75_13980	K01224	E3.2.1.89	arabinogalactan endo-1,4-beta-galactosidase [EC:3.2.1.89]			YPO0853	COG3867	Arabinogalactan endo-1,4-beta-galactosidase	[G]
AHG.bin.5
gene0056 68808 67180 k141_257365_length_45937_cov_15.4605_5 5003 3375	WP_081117876.1	cellulase family glycosylhydrolase [Enterococcus casseliflavus]	P48843.1	RecName: Full=Uncharacterized protein in bgaB 5'region; AltName: Full=ORF1	Biological Process: metabolic process (GO:0008152);|Molecular Function: glucosidase activity (GO:0015926);	ecas:ECBG_02570	K01224	E3.2.1.89	arabinogalactan endo-1,4-beta-galactosidase [EC:3.2.1.89]			YPO0853	COG3867	Arabinogalactan endo-1,4-beta-galactosidase	[G]
FG.bin.1
gene2109 2256441 2255239 k141_560286_length_16891_cov_70.0042_9 9070 7868	WP_095094466.1	MULTISPECIES: galactosidase [Enterobacteriaceae]	P48843.1	RecName: Full=Uncharacterized protein in bgaB 5'region; AltName: Full=ORF1	Biological Process: metabolic process (GO:0008152);|Molecular Function: glucosidase activity (GO:0015926);	ron:TE10_07900	K01224	E3.2.1.89	arabinogalactan endo-1,4-beta-galactosidase [EC:3.2.1.89]			YPO0853	COG3867	Arabinogalactan endo-1,4-beta-galactosidase	[G]
PHG.bin.9
gene1889 2108401 2110029 k141_68342_length_20147_cov_40.9008_6 4959 6587	WP_081117876.1	cellulase family glycosylhydrolase [Enterococcus casseliflavus]	P48843.1	RecName: Full=Uncharacterized protein in bgaB 5'region; AltName: Full=ORF1	Biological Process: metabolic process (GO:0008152);|Molecular Function: glucosidase activity (GO:0015926);	ecas:ECBG_02570	K01224	E3.2.1.89	arabinogalactan endo-1,4-beta-galactosidase [EC:3.2.1.89]			YPO0853	COG3867	Arabinogalactan endo-1,4-beta-galactosidase	[G]
AHG.bin.1
gene3996 4285847 4284276 k141_64921_length_17706_cov_39.0855_12 12635 11064	WP_095099786.1	MULTISPECIES: galactarate dehydratase [Enterobacteriaceae]	P39829.2	RecName: Full=Galactarate dehydratase (L-threo-forming); Short=GalcD	Molecular Function: galactarate dehydratase activity (GO:0008867);|Biological Process: galactarate catabolic process (GO:0046392);	ron:TE10_24680	K01708	garD	galactarate dehydratase [EC:4.2.1.42]	ko00053	Ascorbate and aldarate metabolism	STM3250	COG2721	Altronate dehydratase	[G]
FG.bin.1
gene3317 3520974 3522023 k141_510102_length_9923_cov_64.2845_10 8874 9923	WP_095099786.1	MULTISPECIES: galactarate dehydratase [Enterobacteriaceae]	P39829.2	RecName: Full=Galactarate dehydratase (L-threo-forming); Short=GalcD	Molecular Function: galactarate dehydratase activity (GO:0008867);|Biological Process: galactarate catabolic process (GO:0046392);	ron:TE10_24680	K01708	garD	galactarate dehydratase [EC:4.2.1.42]	ko00053	Ascorbate and aldarate metabolism	STM3250	COG2721	Altronate dehydratase	[G]
PHG.bin.6
gene4227 3887456 3887593 k141_387206_length_4717_cov_17.9183 3 140	WP_095099786.1	MULTISPECIES: galactarate dehydratase [Enterobacteriaceae]	P39829.2	RecName: Full=Galactarate dehydratase (L-threo-forming); Short=GalcD	Molecular Function: galactarate dehydratase activity (GO:0008867);|Biological Process: galactarate catabolic process (GO:0046392);	ron:TE10_24680	K01708	garD	galactarate dehydratase [EC:4.2.1.42]	ko00053	Ascorbate and aldarate metabolism	ECs4006	COG2721	Altronate dehydratase	[G]
gene6358 5696437 5694866 k141_386566_length_2258_cov_14.0000 1675 104	WP_049078863.1	MULTISPECIES: galactarate dehydratase [Klebsiella]	P39829.2	RecName: Full=Galactarate dehydratase (L-threo-forming); Short=GalcD	Molecular Function: galactarate dehydratase activity (GO:0008867);|Biological Process: galactarate catabolic process (GO:0046392);	koy:J415_06285	K01708	garD	galactarate dehydratase [EC:4.2.1.42]	ko00053	Ascorbate and aldarate metabolism	STM3250	COG2721	Altronate dehydratase	[G]
AHG.bin.1
gene0427 444234 445385 k141_27246_length_78455_cov_40.0548_44 39492 40643	WP_095095923.1	MULTISPECIES: mandelate racemase/muconate lactonizing enzyme family protein [Enterobacteriaceae]	H2IFX0.1	RecName: Full=3,6-anhydro-alpha-L-galactonate cycloisomerase; Short=AHGA cycloisomerase	Molecular Function: isomerase activity (GO:0016853);|Biological Process: galactose catabolic process (GO:0019388);|Molecular Function: metal ion binding (GO:0046872);	cama:F384_04830	K20023	talrD-galrD	L-talarate/galactarate dehydratase [EC:4.2.1.156 4.2.1.42]	ko00053	Ascorbate and aldarate metabolism	mll7149	COG4948	L-alanine-DL-glutamate epimerase and related enzymes of enolase superfamily	[MR]
gene2784 3006701 3005505 k141_409264_length_29073_cov_39.8048_16 14946 13750	WP_095097616.1	MULTISPECIES: L-talarate/galactarate dehydratase [Enterobacteriaceae]	Q8ZL58.1	RecName: Full=L-talarate/galactarate dehydratase; Short=TalrD/GalrD	Molecular Function: galactarate dehydratase activity (GO:0008867);|Biological Process: cellular amino acid catabolic process (GO:0009063);|Biological Process: galactarate catabolic process (GO:0046392);|Molecular Function: metal ion binding (GO:0046872);|Biological Process: L-altrarate catabolic process (GO:1903663);|Molecular Function: L-altrarate dehydratase activity (GO:1990594);	ron:TE10_13620	K20023	talrD-galrD	L-talarate/galactarate dehydratase [EC:4.2.1.156 4.2.1.42]	ko00053	Ascorbate and aldarate metabolism	STM3697	COG4948	L-alanine-DL-glutamate epimerase and related enzymes of enolase superfamily	[MR]
FG.bin.1
gene1925 2059442 2060593 k141_371112_length_18253_cov_63.4426_10 6870 8021	WP_095095923.1	MULTISPECIES: mandelate racemase/muconate lactonizing enzyme family protein [Enterobacteriaceae]	H2IFX0.1	RecName: Full=3,6-anhydro-alpha-L-galactonate cycloisomerase; Short=AHGA cycloisomerase	Molecular Function: isomerase activity (GO:0016853);|Biological Process: galactose catabolic process (GO:0019388);|Molecular Function: metal ion binding (GO:0046872);	cama:F384_04830	K20023	talrD-galrD	L-talarate/galactarate dehydratase [EC:4.2.1.156 4.2.1.42]	ko00053	Ascorbate and aldarate metabolism	mll7149	COG4948	L-alanine-DL-glutamate epimerase and related enzymes of enolase superfamily	[MR]
gene3923 4140155 4138959 k141_256025_length_7079_cov_62.2893_5 5358 4162	WP_134525829.1	L-talarate/galactarate dehydratase [Raoultella terrigena]	Q8ZL58.1	RecName: Full=L-talarate/galactarate dehydratase; Short=TalrD/GalrD	Molecular Function: galactarate dehydratase activity (GO:0008867);|Biological Process: cellular amino acid catabolic process (GO:0009063);|Biological Process: galactarate catabolic process (GO:0046392);|Molecular Function: metal ion binding (GO:0046872);|Biological Process: L-altrarate catabolic process (GO:1903663);|Molecular Function: L-altrarate dehydratase activity (GO:1990594);	ron:TE10_13620	K20023	talrD-galrD	L-talarate/galactarate dehydratase [EC:4.2.1.156 4.2.1.42]	ko00053	Ascorbate and aldarate metabolism	STM3697	COG4948	L-alanine-DL-glutamate epimerase and related enzymes of enolase superfamily	[MR]
PHG.bin.6
gene4706 4308462 4309565 k141_379511_length_4057_cov_12.0000_2 461 1564	WP_112216415.1	MULTISPECIES: mandelate racemase/muconate lactonizing enzyme family protein [Klebsiella]	Q8ZL58.1	RecName: Full=L-talarate/galactarate dehydratase; Short=TalrD/GalrD	Molecular Function: galactarate dehydratase activity (GO:0008867);|Biological Process: cellular amino acid catabolic process (GO:0009063);|Biological Process: galactarate catabolic process (GO:0046392);|Molecular Function: metal ion binding (GO:0046872);|Biological Process: L-altrarate catabolic process (GO:1903663);|Molecular Function: L-altrarate dehydratase activity (GO:1990594);	kok:KONIH1_03350	K20023	talrD-galrD	L-talarate/galactarate dehydratase [EC:4.2.1.156 4.2.1.42]	ko00053	Ascorbate and aldarate metabolism	BMEI1712	COG4948	L-alanine-DL-glutamate epimerase and related enzymes of enolase superfamily	[MR]
gene6518 5817671 5818339 k141_701158_length_1561_cov_17.0000 1 669	WP_057174140.1	MULTISPECIES: L-talarate/galactarate dehydratase [Klebsiella]	Q8ZL58.1	RecName: Full=L-talarate/galactarate dehydratase; Short=TalrD/GalrD	Molecular Function: galactarate dehydratase activity (GO:0008867);|Biological Process: cellular amino acid catabolic process (GO:0009063);|Biological Process: galactarate catabolic process (GO:0046392);|Molecular Function: metal ion binding (GO:0046872);|Biological Process: L-altrarate catabolic process (GO:1903663);|Molecular Function: L-altrarate dehydratase activity (GO:1990594);	kom:HR38_18235	K20023	talrD-galrD	L-talarate/galactarate dehydratase [EC:4.2.1.156 4.2.1.42]	ko00053	Ascorbate and aldarate metabolism	STM3697	COG4948	L-alanine-DL-glutamate epimerase and related enzymes of enolase superfamily	[MR]
PHG.bin.3
gene1282 1371450 1371740 k141_401469_length_13412_cov_22.5104 1 291	WP_095845210.1	mandelate racemase/muconate lactonizing enzyme family protein [Gibbsiella quercinecans]	A9CEQ8.1	RecName: Full=D-galactarolactone cycloisomerase	Biological Process: cellular amino acid catabolic process (GO:0009063);|Molecular Function: isomerase activity (GO:0016853);|Molecular Function: metal ion binding (GO:0046872);	sod:Sant_1026	K18983	gci	D-galactarolactone cycloisomerase [EC:5.5.1.27]	ko00053	Ascorbate and aldarate metabolism	AGl3340	COG4948	L-alanine-DL-glutamate epimerase and related enzymes of enolase superfamily	[MR]
PHG.bin.6
gene5217 4753076 4754101 k141_725762_length_3559_cov_33.7876_3 2533 3558	WP_095845210.1	mandelate racemase/muconate lactonizing enzyme family protein [Gibbsiella quercinecans]	A9CEQ8.1	RecName: Full=D-galactarolactone cycloisomerase	Biological Process: cellular amino acid catabolic process (GO:0009063);|Molecular Function: isomerase activity (GO:0016853);|Molecular Function: metal ion binding (GO:0046872);	cama:F384_17470	K18983	gci	D-galactarolactone cycloisomerase [EC:5.5.1.27]	ko00053	Ascorbate and aldarate metabolism	AGl3340	COG4948	L-alanine-DL-glutamate epimerase and related enzymes of enolase superfamily	[MR]
AHG.bin.1
gene2508 2723280 2725265 k141_23490_length_32662_cov_66.6287_10 8844 10829	WP_095102882.1	MULTISPECIES: bifunctional UDP-4-amino-4-deoxy-L-arabinose formyltransferase/UDP-glucuronic acid oxidase ArnA [Enterobacteriaceae]	B5XTK9.1	RecName: Full=Bifunctional polymyxin resistance protein ArnA; Includes: RecName: Full=UDP-4-amino-4-deoxy-L-arabinose formyltransferase; AltName: Full=ArnAFT; AltName: Full=UDP-L-Ara4N formyltransferase; Includes: RecName: Full=UDP-glucuronic acid oxidase, UDP-4-keto-hexauronic acid decarboxylating; AltName: Full=ArnADH; AltName: Full=UDP-GlcUA decarboxylase; AltName: Full=UDP-glucuronic acid deh…	Biological Process: lipopolysaccharide biosynthetic process (GO:0009103);|Biological Process: lipid A biosynthetic process (GO:0009245);|Biological Process: response to antibiotic (GO:0046677);|Molecular Function: coenzyme binding (GO:0050662);|Molecular Function: UDP-glucuronic acid dehydrogenase activity (GO:0099618);|Molecular Function: UDP-4-amino-4-deoxy-L-arabinose formyltransferase activit…	ron:TE10_00870	K10011	arnA, pmrI	UDP-4-amino-4-deoxy-L-arabinose formyltransferase / UDP-glucuronic acid dehydrogenase (UDP-4-keto-hexauronic acid decarboxylating) [EC:2.1.2.13 1.1.1.305]	ko00520,ko01503	Amino sugar and nucleotide sugar metabolism|Cationic antimicrobial peptide (CAMP) resistance	yfbG_2	COG0451	Nucleoside-diphosphate-sugar epimerases	[MG]
AHG.bin.4
gene1568 1710068 1712053 k141_142974_length_10543_cov_58.5524_4 2793 4778	WP_095848554.1	bifunctional UDP-4-amino-4-deoxy-L-arabinose formyltransferase/UDP-glucuronic acid oxidase ArnA [Gibbsiella quercinecans]	A8GDR7.1	RecName: Full=Bifunctional polymyxin resistance protein ArnA; Includes: RecName: Full=UDP-4-amino-4-deoxy-L-arabinose formyltransferase; AltName: Full=ArnAFT; AltName: Full=UDP-L-Ara4N formyltransferase; Includes: RecName: Full=UDP-glucuronic acid oxidase, UDP-4-keto-hexauronic acid decarboxylating; AltName: Full=ArnADH; AltName: Full=UDP-GlcUA decarboxylase; AltName: Full=UDP-glucuronic acid deh…	Biological Process: lipopolysaccharide biosynthetic process (GO:0009103);|Biological Process: lipid A biosynthetic process (GO:0009245);|Biological Process: response to antibiotic (GO:0046677);|Molecular Function: coenzyme binding (GO:0050662);|Molecular Function: UDP-glucuronic acid dehydrogenase activity (GO:0099618);|Molecular Function: UDP-4-amino-4-deoxy-L-arabinose formyltransferase activit…	slq:M495_10685	K10011	arnA, pmrI	UDP-4-amino-4-deoxy-L-arabinose formyltransferase / UDP-glucuronic acid dehydrogenase (UDP-4-keto-hexauronic acid decarboxylating) [EC:2.1.2.13 1.1.1.305]	ko00520,ko01503	Amino sugar and nucleotide sugar metabolism|Cationic antimicrobial peptide (CAMP) resistance	YPO2420_2	COG0451	Nucleoside-diphosphate-sugar epimerases	[MG]
FG.bin.1
gene2760 2953500 2951515 k141_250703_length_13151_cov_63.1873_7 6208 4223	WP_095102882.1	MULTISPECIES: bifunctional UDP-4-amino-4-deoxy-L-arabinose formyltransferase/UDP-glucuronic acid oxidase ArnA [Enterobacteriaceae]	B5XTK9.1	RecName: Full=Bifunctional polymyxin resistance protein ArnA; Includes: RecName: Full=UDP-4-amino-4-deoxy-L-arabinose formyltransferase; AltName: Full=ArnAFT; AltName: Full=UDP-L-Ara4N formyltransferase; Includes: RecName: Full=UDP-glucuronic acid oxidase, UDP-4-keto-hexauronic acid decarboxylating; AltName: Full=ArnADH; AltName: Full=UDP-GlcUA decarboxylase; AltName: Full=UDP-glucuronic acid deh…	Biological Process: lipopolysaccharide biosynthetic process (GO:0009103);|Biological Process: lipid A biosynthetic process (GO:0009245);|Biological Process: response to antibiotic (GO:0046677);|Molecular Function: coenzyme binding (GO:0050662);|Molecular Function: UDP-glucuronic acid dehydrogenase activity (GO:0099618);|Molecular Function: UDP-4-amino-4-deoxy-L-arabinose formyltransferase activit…	ron:TE10_00870	K10011	arnA, pmrI	UDP-4-amino-4-deoxy-L-arabinose formyltransferase / UDP-glucuronic acid dehydrogenase (UDP-4-keto-hexauronic acid decarboxylating) [EC:2.1.2.13 1.1.1.305]	ko00520,ko01503	Amino sugar and nucleotide sugar metabolism|Cationic antimicrobial peptide (CAMP) resistance	yfbG_2	COG0451	Nucleoside-diphosphate-sugar epimerases	[MG]
MG.bin.1
gene1726 1776772 1774787 k141_217706_length_15416_cov_17.0000_3 4515 2530	WP_095102882.1	MULTISPECIES: bifunctional UDP-4-amino-4-deoxy-L-arabinose formyltransferase/UDP-glucuronic acid oxidase ArnA [Enterobacteriaceae]	B5XTK9.1	RecName: Full=Bifunctional polymyxin resistance protein ArnA; Includes: RecName: Full=UDP-4-amino-4-deoxy-L-arabinose formyltransferase; AltName: Full=ArnAFT; AltName: Full=UDP-L-Ara4N formyltransferase; Includes: RecName: Full=UDP-glucuronic acid oxidase, UDP-4-keto-hexauronic acid decarboxylating; AltName: Full=ArnADH; AltName: Full=UDP-GlcUA decarboxylase; AltName: Full=UDP-glucuronic acid deh…	Biological Process: lipopolysaccharide biosynthetic process (GO:0009103);|Biological Process: lipid A biosynthetic process (GO:0009245);|Biological Process: response to antibiotic (GO:0046677);|Molecular Function: coenzyme binding (GO:0050662);|Molecular Function: UDP-glucuronic acid dehydrogenase activity (GO:0099618);|Molecular Function: UDP-4-amino-4-deoxy-L-arabinose formyltransferase activit…	ron:TE10_00870	K10011	arnA, pmrI	UDP-4-amino-4-deoxy-L-arabinose formyltransferase / UDP-glucuronic acid dehydrogenase (UDP-4-keto-hexauronic acid decarboxylating) [EC:2.1.2.13 1.1.1.305]	ko00520,ko01503	Amino sugar and nucleotide sugar metabolism|Cationic antimicrobial peptide (CAMP) resistance	yfbG_2	COG0451	Nucleoside-diphosphate-sugar epimerases	[MG]
PHG.bin.3
gene0889 931961 933946 k141_209733_length_16383_cov_11.0000_4 2993 4978	WP_115167381.1	MULTISPECIES: bifunctional UDP-4-amino-4-deoxy-L-arabinose formyltransferase/UDP-glucuronic acid oxidase ArnA [Providencia]	B4ETL7.1	RecName: Full=Bifunctional polymyxin resistance protein ArnA; Includes: RecName: Full=UDP-4-amino-4-deoxy-L-arabinose formyltransferase; AltName: Full=ArnAFT; AltName: Full=UDP-L-Ara4N formyltransferase; Includes: RecName: Full=UDP-glucuronic acid oxidase, UDP-4-keto-hexauronic acid decarboxylating; AltName: Full=ArnADH; AltName: Full=UDP-GlcUA decarboxylase; AltName: Full=UDP-glucuronic acid deh…	Biological Process: lipopolysaccharide biosynthetic process (GO:0009103);|Biological Process: lipid A biosynthetic process (GO:0009245);|Biological Process: response to antibiotic (GO:0046677);|Molecular Function: coenzyme binding (GO:0050662);|Molecular Function: UDP-glucuronic acid dehydrogenase activity (GO:0099618);|Molecular Function: UDP-4-amino-4-deoxy-L-arabinose formyltransferase activit…	psx:DR96_2785	K10011	arnA, pmrI	UDP-4-amino-4-deoxy-L-arabinose formyltransferase / UDP-glucuronic acid dehydrogenase (UDP-4-keto-hexauronic acid decarboxylating) [EC:2.1.2.13 1.1.1.305]	ko00520,ko01503	Amino sugar and nucleotide sugar metabolism|Cationic antimicrobial peptide (CAMP) resistance	YPO2420_2	COG0451	Nucleoside-diphosphate-sugar epimerases	[MG]
PHG.bin.4
gene2567 2607335 2605350 k141_491503_length_6484_cov_564.7955_2 2403 418	WP_095102882.1	MULTISPECIES: bifunctional UDP-4-amino-4-deoxy-L-arabinose formyltransferase/UDP-glucuronic acid oxidase ArnA [Enterobacteriaceae]	B5XTK9.1	RecName: Full=Bifunctional polymyxin resistance protein ArnA; Includes: RecName: Full=UDP-4-amino-4-deoxy-L-arabinose formyltransferase; AltName: Full=ArnAFT; AltName: Full=UDP-L-Ara4N formyltransferase; Includes: RecName: Full=UDP-glucuronic acid oxidase, UDP-4-keto-hexauronic acid decarboxylating; AltName: Full=ArnADH; AltName: Full=UDP-GlcUA decarboxylase; AltName: Full=UDP-glucuronic acid deh…	Biological Process: lipopolysaccharide biosynthetic process (GO:0009103);|Biological Process: lipid A biosynthetic process (GO:0009245);|Biological Process: response to antibiotic (GO:0046677);|Molecular Function: coenzyme binding (GO:0050662);|Molecular Function: UDP-glucuronic acid dehydrogenase activity (GO:0099618);|Molecular Function: UDP-4-amino-4-deoxy-L-arabinose formyltransferase activit…	ron:TE10_00870	K10011	arnA, pmrI	UDP-4-amino-4-deoxy-L-arabinose formyltransferase / UDP-glucuronic acid dehydrogenase (UDP-4-keto-hexauronic acid decarboxylating) [EC:2.1.2.13 1.1.1.305]	ko00520,ko01503	Amino sugar and nucleotide sugar metabolism|Cationic antimicrobial peptide (CAMP) resistance	yfbG_2	COG0451	Nucleoside-diphosphate-sugar epimerases	[MG]
MG.bin.1
gene5606 5490997 5490350 k141_15798_length_3175_cov_21.3889 648 1	WP_095100915.1	MULTISPECIES: NAD-dependent epimerase [Enterobacteriaceae]	Q04871.1	RecName: Full=Uncharacterized 37.6 kDa protein in cld 5'region; AltName: Full=ORF2	Biological Process: carbohydrate metabolic process (GO:0005975);|Molecular Function: lyase activity (GO:0016829);|Molecular Function: racemase and epimerase activity, acting on carbohydrates and derivatives (GO:0016857);|Molecular Function: coenzyme binding (GO:0050662);	ron:TE10_19215	K08679	E5.1.3.6	UDP-glucuronate 4-epimerase [EC:5.1.3.6]	ko00520	Amino sugar and nucleotide sugar metabolism	BH3709	COG0451	Nucleoside-diphosphate-sugar epimerases	[MG]
PHG.bin.3
gene4376 4449062 4448061 k141_32363_length_4060_cov_11.9464_2 1389 388	WP_004906856.1	MULTISPECIES: NAD-dependent epimerase [Providencia]	Q04871.1	RecName: Full=Uncharacterized 37.6 kDa protein in cld 5'region; AltName: Full=ORF2	Biological Process: carbohydrate metabolic process (GO:0005975);|Molecular Function: lyase activity (GO:0016829);|Molecular Function: racemase and epimerase activity, acting on carbohydrates and derivatives (GO:0016857);|Molecular Function: coenzyme binding (GO:0050662);	psx:DR96_1069	K08679	E5.1.3.6	UDP-glucuronate 4-epimerase [EC:5.1.3.6]	ko00520	Amino sugar and nucleotide sugar metabolism	BH3709	COG0451	Nucleoside-diphosphate-sugar epimerases	[MG]
PHG.bin.6
gene2998 2743435 2742431 k141_90256_length_6484_cov_30.1134_2 1909 905	WP_004103673.1	NAD-dependent epimerase [Klebsiella oxytoca]	Q04871.1	RecName: Full=Uncharacterized 37.6 kDa protein in cld 5'region; AltName: Full=ORF2	Biological Process: carbohydrate metabolic process (GO:0005975);|Molecular Function: lyase activity (GO:0016829);|Molecular Function: racemase and epimerase activity, acting on carbohydrates and derivatives (GO:0016857);|Molecular Function: coenzyme binding (GO:0050662);	kom:HR38_23195	K08679	E5.1.3.6	UDP-glucuronate 4-epimerase [EC:5.1.3.6]	ko00520	Amino sugar and nucleotide sugar metabolism	BH3709	COG0451	Nucleoside-diphosphate-sugar epimerases	[MG]
Cellulolytic enzymes
Celluase
AHG.bin.1
gene1058 1142652 1143653 k141_143972_length_54662_cov_58.8532_12 16006 17007	WP_088912219.1	MULTISPECIES: endoglucanase [Enterobacteriaceae]	P18336.1	RecName: Full=Endoglucanase; AltName: Full=Cellulase; AltName: Full=Endo-1,4-beta-glucanase; Flags: Precursor	Molecular Function: cellulase activity (GO:0008810);|Biological Process: cellulose catabolic process (GO:0030245);	ron:TE10_01090	K20542	bcsZ	endoglucanase [EC:3.2.1.4]			AGl3023gl	COG3405	Endoglucanase Y	[G]
gene1066 1153212 1154321 k141_143972_length_54662_cov_58.8532_20 26566 27675	WP_095102991.1	MULTISPECIES: cellulase [Enterobacteriaceae]	Q8X5L9.1	RecName: Full=Endoglucanase; AltName: Full=Carboxymethylcellulase; Short=CMCase; AltName: Full=Cellulase; AltName: Full=Endo-1,4-beta-glucanase; Flags: Precursor	Cellular Component: extracellular region (GO:0005576);|Molecular Function: cellulase activity (GO:0008810);|Biological Process: cellulose catabolic process (GO:0030245);	ron:TE10_01055	K20542	bcsZ	endoglucanase [EC:3.2.1.4]			ECs4411	COG3405	Endoglucanase Y	[G]
AHG.bin.4
gene1732 1878309 1877308 k141_24801_length_9712_cov_180.7382_11 9558 8557	WP_121525868.1	endoglucanase [Gibbsiella quercinecans]	P27032.1	RecName: Full=Minor endoglucanase Y; AltName: Full=Cellulase Y; AltName: Full=Endo-1,4-beta-glucanase Y; Short=EGY; Flags: Precursor	Molecular Function: cellulase activity (GO:0008810);|Biological Process: cellulose catabolic process (GO:0030245);	rah:Rahaq_0102	K20542	bcsZ	endoglucanase [EC:3.2.1.4]			AGl3023gl	COG3405	Endoglucanase Y	[G]
AHG.bin.5
gene0071 88850 87720 k141_257365_length_45937_cov_15.4605_20 25045 23915	KRL33028.1	endoglucanase Y [Lactobacillus uvarum DSM 19971]	P19254.1	RecName: Full=Beta-glucanase; AltName: Full=Endo-beta-1,3-1,4 glucanase; Flags: Precursor	Biological Process: carbohydrate metabolic process (GO:0005975);|Molecular Function: licheninase activity (GO:0042972);	lmk:LMES_1342	K20542	bcsZ	endoglucanase [EC:3.2.1.4]
FG.bin.1
gene0111 113850 112741 k141_51196_length_46280_cov_72.9541_11 17744 16635	WP_095102991.1	MULTISPECIES: cellulase [Enterobacteriaceae]	Q8X5L9.1	RecName: Full=Endoglucanase; AltName: Full=Carboxymethylcellulase; Short=CMCase; AltName: Full=Cellulase; AltName: Full=Endo-1,4-beta-glucanase; Flags: Precursor	Cellular Component: extracellular region (GO:0005576);|Molecular Function: cellulase activity (GO:0008810);|Biological Process: cellulose catabolic process (GO:0030245);	ron:TE10_01055	K20542	bcsZ	endoglucanase [EC:3.2.1.4]			ECs4411	COG3405	Endoglucanase Y	[G]
gene0119 124410 123409 k141_51196_length_46280_cov_72.9541_19 28304 27303	WP_095102804.1	MULTISPECIES: endoglucanase [Enterobacteriaceae]	P18336.1	RecName: Full=Endoglucanase; AltName: Full=Cellulase; AltName: Full=Endo-1,4-beta-glucanase; Flags: Precursor	Molecular Function: cellulase activity (GO:0008810);|Biological Process: cellulose catabolic process (GO:0030245);	ron:TE10_01090	K20542	bcsZ	endoglucanase [EC:3.2.1.4]			AGl3023gl	COG3405	Endoglucanase Y	[G]
MG.bin.1
gene0597 618803 617802 k141_524869_length_24854_cov_10.0000_7 7511 6510	WP_095102804.1	MULTISPECIES: endoglucanase [Enterobacteriaceae]	P18336.1	RecName: Full=Endoglucanase; AltName: Full=Cellulase; AltName: Full=Endo-1,4-beta-glucanase; Flags: Precursor	Molecular Function: cellulase activity (GO:0008810);|Biological Process: cellulose catabolic process (GO:0030245);	ron:TE10_01090	K20542	bcsZ	endoglucanase [EC:3.2.1.4]			AGl3023gl	COG3405	Endoglucanase Y	[G]
gene3407 3422864 3421755 k141_475103_length_9255_cov_14.0000_3 6239 5130	WP_095102991.1	MULTISPECIES: cellulase [Enterobacteriaceae]	Q8X5L9.1	RecName: Full=Endoglucanase; AltName: Full=Carboxymethylcellulase; Short=CMCase; AltName: Full=Cellulase; AltName: Full=Endo-1,4-beta-glucanase; Flags: Precursor	Cellular Component: extracellular region (GO:0005576);|Molecular Function: cellulase activity (GO:0008810);|Biological Process: cellulose catabolic process (GO:0030245);	ron:TE10_01055	K20542	bcsZ	endoglucanase [EC:3.2.1.4]			ECs4411	COG3405	Endoglucanase Y	[G]
PHG.bin.4
gene2293 2342057 2343166 k141_604030_length_7173_cov_305.2590_3 2691 3800	WP_095102991.1	MULTISPECIES: cellulase [Enterobacteriaceae]	Q8X5L9.1	RecName: Full=Endoglucanase; AltName: Full=Carboxymethylcellulase; Short=CMCase; AltName: Full=Cellulase; AltName: Full=Endo-1,4-beta-glucanase; Flags: Precursor	Cellular Component: extracellular region (GO:0005576);|Molecular Function: cellulase activity (GO:0008810);|Biological Process: cellulose catabolic process (GO:0030245);	ron:TE10_01055	K20542	bcsZ	endoglucanase [EC:3.2.1.4]			ECs4411	COG3405	Endoglucanase Y	[G]
gene4439 4350421 4349420 k141_281138_length_2371_cov_78.3444 1046 45	WP_095102804.1	MULTISPECIES: endoglucanase [Enterobacteriaceae]	P18336.1	RecName: Full=Endoglucanase; AltName: Full=Cellulase; AltName: Full=Endo-1,4-beta-glucanase; Flags: Precursor	Molecular Function: cellulase activity (GO:0008810);|Biological Process: cellulose catabolic process (GO:0030245);	ron:TE10_01090	K20542	bcsZ	endoglucanase [EC:3.2.1.4]			AGl3023gl	COG3405	Endoglucanase Y	[G]
gene4727 4603067 4603162 k141_710357_length_1704_cov_89.5310 2 97	WP_123709637.1	MULTISPECIES: endoglucanase [Raoultella]				ron:TE10_01090	K20542	bcsZ	endoglucanase [EC:3.2.1.4]
PHG.bin.6
gene1594 1478435 1479544 k141_302810_length_10251_cov_19.7278_6 6673 7782	VUS66223.1	Endoglucanase [Klebsiella huaxiensis]	Q8ZLB7.1	RecName: Full=Endoglucanase; AltName: Full=Carboxymethylcellulase; Short=CMCase; AltName: Full=Cellulase; AltName: Full=Endo-1,4-beta-glucanase; Flags: Precursor	Cellular Component: extracellular region (GO:0005576);|Molecular Function: cellulase activity (GO:0008810);|Biological Process: cellulose catabolic process (GO:0030245);	kok:KONIH1_27905	K20542	bcsZ	endoglucanase [EC:3.2.1.4]			STM3617	COG3405	Endoglucanase Y	[G]
gene3641 3360214 3359219 k141_781078_length_5503_cov_12.0000_4 3589 2594	WP_142513394.1	endoglucanase [Klebsiella huaxiensis]	P18336.1	RecName: Full=Endoglucanase; AltName: Full=Cellulase; AltName: Full=Endo-1,4-beta-glucanase; Flags: Precursor	Molecular Function: cellulase activity (GO:0008810);|Biological Process: cellulose catabolic process (GO:0030245);	kok:KONIH1_27965	K20542	bcsZ	endoglucanase [EC:3.2.1.4]			AGl3023gl	COG3405	Endoglucanase Y	[G]
PHG.bin.9
gene2579 2856180 2855125 k141_108037_length_11605_cov_274.0721_8 10865 9810	KRL33028.1	endoglucanase Y [Lactobacillus uvarum DSM 19971]	P19254.1	RecName: Full=Beta-glucanase; AltName: Full=Endo-beta-1,3-1,4 glucanase; Flags: Precursor	Biological Process: carbohydrate metabolic process (GO:0005975);|Molecular Function: licheninase activity (GO:0042972);	lmk:LMES_1342	K20542	bcsZ	endoglucanase [EC:3.2.1.4]
beta-glucosidase
AHG.bin.1
gene0625 671890 674241 k141_383798_length_70721_cov_48.4088_47 46046 48397	WP_095097043.1	MULTISPECIES: glycosyl hydrolase [Enterobacteriaceae]	P14002.2	RecName: Full=Thermostable beta-glucosidase B; AltName: Full=Beta-D-glucoside glucohydrolase; AltName: Full=Cellobiase; AltName: Full=Gentiobiase	Molecular Function: beta-glucosidase activity (GO:0008422);|Biological Process: cellulose catabolic process (GO:0030245);|Molecular Function: scopolin beta-glucosidase activity (GO:0102483);	ron:TE10_12500	K05349	bglX	beta-glucosidase [EC:3.2.1.21]	ko00460,ko00500,ko00940	Cyanoamino acid metabolism|Starch and sucrose metabolism|Phenylpropanoid biosynthesis	YPO2803	COG1472	Beta-glucosidase-related glycosidases	[G]
gene1029 1107340 1105043 k141_473671_length_56391_cov_41.0319_39 37085 34788	WP_095100773.1	MULTISPECIES: beta-glucosidase BglX [Enterobacteriaceae]	P33363.2	RecName: Full=Periplasmic beta-glucosidase; AltName: Full=Beta-D-glucoside glucohydrolase; AltName: Full=Cellobiase; AltName: Full=Gentiobiase; Flags: Precursor	Cellular Component: plasma membrane (GO:0005886);|Molecular Function: beta-glucosidase activity (GO:0008422);|Biological Process: glucan catabolic process (GO:0009251);|Molecular Function: glucosidase activity (GO:0015926);|Cellular Component: outer membrane-bounded periplasmic space (GO:0030288);|Cellular Component: periplasmic space (GO:0042597);|Molecular Function: scopolin beta-glucosidase ac…	ron:TE10_19655	K05349	bglX	beta-glucosidase [EC:3.2.1.21]	ko00460,ko00500,ko00940	Cyanoamino acid metabolism|Starch and sucrose metabolism|Phenylpropanoid biosynthesis	bglX	COG1472	Beta-glucosidase-related glycosidases	[G]
AHG.bin.4
gene0603 684461 686758 k141_157968_length_20693_cov_47.0163_9 8915 11212	WP_095845345.1	beta-glucosidase BglX [Gibbsiella quercinecans]	Q56078.2	RecName: Full=Periplasmic beta-glucosidase; AltName: Full=Beta-D-glucoside glucohydrolase; AltName: Full=Cellobiase; AltName: Full=Gentiobiase; AltName: Full=T-cell inhibitor; Flags: Precursor	Cellular Component: plasma membrane (GO:0005886);|Molecular Function: beta-glucosidase activity (GO:0008422);|Biological Process: glucan catabolic process (GO:0009251);|Cellular Component: periplasmic space (GO:0042597);|Molecular Function: scopolin beta-glucosidase activity (GO:0102483);	srl:SOD_c12580	K05349	bglX	beta-glucosidase [EC:3.2.1.21]	ko00460,ko00500,ko00940	Cyanoamino acid metabolism|Starch and sucrose metabolism|Phenylpropanoid biosynthesis	STM2166	COG1472	Beta-glucosidase-related glycosidases	[G]
AHG.bin.5
gene0846 911265 909943 k141_476817_length_16586_cov_12.0000 1325 3	WP_137663193.1	beta-glucosidase BglX [Enterococcus sp. 190-7]	P33363.2	RecName: Full=Periplasmic beta-glucosidase; AltName: Full=Beta-D-glucoside glucohydrolase; AltName: Full=Cellobiase; AltName: Full=Gentiobiase; Flags: Precursor	Cellular Component: plasma membrane (GO:0005886);|Molecular Function: beta-glucosidase activity (GO:0008422);|Biological Process: glucan catabolic process (GO:0009251);|Molecular Function: glucosidase activity (GO:0015926);|Cellular Component: outer membrane-bounded periplasmic space (GO:0030288);|Cellular Component: periplasmic space (GO:0042597);|Molecular Function: scopolin beta-glucosidase ac…	ess:ATZ33_10845	K05349	bglX	beta-glucosidase [EC:3.2.1.21]	ko00460,ko00500,ko00940	Cyanoamino acid metabolism|Starch and sucrose metabolism|Phenylpropanoid biosynthesis	lin1840	COG1472	Beta-glucosidase-related glycosidases	[G]
gene1404 1511801 1513948 k141_272159_length_11847_cov_8.0000_4 3467 5614	WP_087057570.1	beta-glucosidase [Marinilactibacillus psychrotolerans]	Q56078.2	RecName: Full=Periplasmic beta-glucosidase; AltName: Full=Beta-D-glucoside glucohydrolase; AltName: Full=Cellobiase; AltName: Full=Gentiobiase; AltName: Full=T-cell inhibitor; Flags: Precursor	Cellular Component: plasma membrane (GO:0005886);|Molecular Function: beta-glucosidase activity (GO:0008422);|Biological Process: glucan catabolic process (GO:0009251);|Cellular Component: periplasmic space (GO:0042597);|Molecular Function: scopolin beta-glucosidase activity (GO:0102483);	ega:AL523_11580	K05349	bglX	beta-glucosidase [EC:3.2.1.21]	ko00460,ko00500,ko00940	Cyanoamino acid metabolism|Starch and sucrose metabolism|Phenylpropanoid biosynthesis	lin1840	COG1472	Beta-glucosidase-related glycosidases	[G]
gene3254 3331221 3330316 k141_123789_length_3292_cov_22.0000_3 3292 2387	WP_067391796.1	beta-glucosidase BglX [Enterococcus canis]	Q56078.2	RecName: Full=Periplasmic beta-glucosidase; AltName: Full=Beta-D-glucoside glucohydrolase; AltName: Full=Cellobiase; AltName: Full=Gentiobiase; AltName: Full=T-cell inhibitor; Flags: Precursor	Cellular Component: plasma membrane (GO:0005886);|Molecular Function: beta-glucosidase activity (GO:0008422);|Biological Process: glucan catabolic process (GO:0009251);|Cellular Component: periplasmic space (GO:0042597);|Molecular Function: scopolin beta-glucosidase activity (GO:0102483);	ess:ATZ33_10845	K05349	bglX	beta-glucosidase [EC:3.2.1.21]	ko00460,ko00500,ko00940	Cyanoamino acid metabolism|Starch and sucrose metabolism|Phenylpropanoid biosynthesis	STM2166	COG1472	Beta-glucosidase-related glycosidases	[G]
gene0338 369500 367350 k141_430608_length_30170_cov_10.9988_7 9893 7743	WP_060813246.1	hypothetical protein [Enterococcus gallinarum]	Q56078.2	RecName: Full=Periplasmic beta-glucosidase; AltName: Full=Beta-D-glucoside glucohydrolase; AltName: Full=Cellobiase; AltName: Full=Gentiobiase; AltName: Full=T-cell inhibitor; Flags: Precursor	Cellular Component: plasma membrane (GO:0005886);|Molecular Function: beta-glucosidase activity (GO:0008422);|Biological Process: glucan catabolic process (GO:0009251);|Cellular Component: periplasmic space (GO:0042597);|Molecular Function: scopolin beta-glucosidase activity (GO:0102483);	ecas:ECBG_01478	K05349	bglX	beta-glucosidase [EC:3.2.1.21]	ko00460,ko00500,ko00940	Cyanoamino acid metabolism|Starch and sucrose metabolism|Phenylpropanoid biosynthesis	lin1840	COG1472	Beta-glucosidase-related glycosidases	[G]
FG.bin.1
gene2412 2580494 2580583 k141_29442_length_14977_cov_61.6227_13 14886 14975	WP_134527069.1	beta-glucosidase BglX [Raoultella terrigena]	P33363.2	RecName: Full=Periplasmic beta-glucosidase; AltName: Full=Beta-D-glucoside glucohydrolase; AltName: Full=Cellobiase; AltName: Full=Gentiobiase; Flags: Precursor	Cellular Component: plasma membrane (GO:0005886);|Molecular Function: beta-glucosidase activity (GO:0008422);|Biological Process: glucan catabolic process (GO:0009251);|Molecular Function: glucosidase activity (GO:0015926);|Cellular Component: outer membrane-bounded periplasmic space (GO:0030288);|Cellular Component: periplasmic space (GO:0042597);|Molecular Function: scopolin beta-glucosidase ac…	ron:TE10_19655	K05349	bglX	beta-glucosidase [EC:3.2.1.21]	ko00460,ko00500,ko00940	Cyanoamino acid metabolism|Starch and sucrose metabolism|Phenylpropanoid biosynthesis	ECs3019	COG1472	Beta-glucosidase-related glycosidases	[G]
gene3858 4061358 4063655 k141_21869_length_7606_cov_65.4405 50 2347	WP_095100773.1	MULTISPECIES: beta-glucosidase BglX [Enterobacteriaceae]	P33363.2	RecName: Full=Periplasmic beta-glucosidase; AltName: Full=Beta-D-glucoside glucohydrolase; AltName: Full=Cellobiase; AltName: Full=Gentiobiase; Flags: Precursor	Cellular Component: plasma membrane (GO:0005886);|Molecular Function: beta-glucosidase activity (GO:0008422);|Biological Process: glucan catabolic process (GO:0009251);|Molecular Function: glucosidase activity (GO:0015926);|Cellular Component: outer membrane-bounded periplasmic space (GO:0030288);|Cellular Component: periplasmic space (GO:0042597);|Molecular Function: scopolin beta-glucosidase ac…	ron:TE10_19655	K05349	bglX	beta-glucosidase [EC:3.2.1.21]	ko00460,ko00500,ko00940	Cyanoamino acid metabolism|Starch and sucrose metabolism|Phenylpropanoid biosynthesis	bglX	COG1472	Beta-glucosidase-related glycosidases	[G]
gene0057 48631 50982 k141_240361_length_47893_cov_60.8048_2 418 2769	WP_095097043.1	MULTISPECIES: glycosyl hydrolase [Enterobacteriaceae]	P14002.2	RecName: Full=Thermostable beta-glucosidase B; AltName: Full=Beta-D-glucoside glucohydrolase; AltName: Full=Cellobiase; AltName: Full=Gentiobiase	Molecular Function: beta-glucosidase activity (GO:0008422);|Biological Process: cellulose catabolic process (GO:0030245);|Molecular Function: scopolin beta-glucosidase activity (GO:0102483);	ron:TE10_12500	K05349	bglX	beta-glucosidase [EC:3.2.1.21]	ko00460,ko00500,ko00940	Cyanoamino acid metabolism|Starch and sucrose metabolism|Phenylpropanoid biosynthesis	YPO2803	COG1472	Beta-glucosidase-related glycosidases	[G]
MG.bin.1
gene2313 2349469 2351820 k141_232909_length_13094_cov_10.0000_5 4366 6717	WP_095097043.1	MULTISPECIES: glycosyl hydrolase [Enterobacteriaceae]	P14002.2	RecName: Full=Thermostable beta-glucosidase B; AltName: Full=Beta-D-glucoside glucohydrolase; AltName: Full=Cellobiase; AltName: Full=Gentiobiase	Molecular Function: beta-glucosidase activity (GO:0008422);|Biological Process: cellulose catabolic process (GO:0030245);|Molecular Function: scopolin beta-glucosidase activity (GO:0102483);	ron:TE10_12500	K05349	bglX	beta-glucosidase [EC:3.2.1.21]	ko00460,ko00500,ko00940	Cyanoamino acid metabolism|Starch and sucrose metabolism|Phenylpropanoid biosynthesis	YPO2803	COG1472	Beta-glucosidase-related glycosidases	[G]
gene4773 4737095 4736103 k141_536581_length_5241_cov_17.0000_7 5240 4248	WP_095100773.1	MULTISPECIES: beta-glucosidase BglX [Enterobacteriaceae]	P33363.2	RecName: Full=Periplasmic beta-glucosidase; AltName: Full=Beta-D-glucoside glucohydrolase; AltName: Full=Cellobiase; AltName: Full=Gentiobiase; Flags: Precursor	Cellular Component: plasma membrane (GO:0005886);|Molecular Function: beta-glucosidase activity (GO:0008422);|Biological Process: glucan catabolic process (GO:0009251);|Molecular Function: glucosidase activity (GO:0015926);|Cellular Component: outer membrane-bounded periplasmic space (GO:0030288);|Cellular Component: periplasmic space (GO:0042597);|Molecular Function: scopolin beta-glucosidase ac…	ron:TE10_19655	K05349	bglX	beta-glucosidase [EC:3.2.1.21]	ko00460,ko00500,ko00940	Cyanoamino acid metabolism|Starch and sucrose metabolism|Phenylpropanoid biosynthesis	bglX	COG1472	Beta-glucosidase-related glycosidases	[G]
gene5217 5138199 5136886 k141_425081_length_4103_cov_8.0000 1314 1	WP_159866246.1	MULTISPECIES: beta-glucosidase BglX [unclassified Raoultella]	P33363.2	RecName: Full=Periplasmic beta-glucosidase; AltName: Full=Beta-D-glucoside glucohydrolase; AltName: Full=Cellobiase; AltName: Full=Gentiobiase; Flags: Precursor	Cellular Component: plasma membrane (GO:0005886);|Molecular Function: beta-glucosidase activity (GO:0008422);|Biological Process: glucan catabolic process (GO:0009251);|Molecular Function: glucosidase activity (GO:0015926);|Cellular Component: outer membrane-bounded periplasmic space (GO:0030288);|Cellular Component: periplasmic space (GO:0042597);|Molecular Function: scopolin beta-glucosidase ac…	ron:TE10_19655	K05349	bglX	beta-glucosidase [EC:3.2.1.21]	ko00460,ko00500,ko00940	Cyanoamino acid metabolism|Starch and sucrose metabolism|Phenylpropanoid biosynthesis	ZbglX	COG1472	Beta-glucosidase-related glycosidases	[G]
PHG.bin.2
gene0729 858276 860618 k141_313111_length_415938_cov_34.1247_132 170146 172488	WP_050699673.1	beta-glucosidase [Dysgonomonas sp. BGC7]	P33363.2	RecName: Full=Periplasmic beta-glucosidase; AltName: Full=Beta-D-glucoside glucohydrolase; AltName: Full=Cellobiase; AltName: Full=Gentiobiase; Flags: Precursor	Cellular Component: plasma membrane (GO:0005886);|Molecular Function: beta-glucosidase activity (GO:0008422);|Biological Process: glucan catabolic process (GO:0009251);|Molecular Function: glucosidase activity (GO:0015926);|Cellular Component: outer membrane-bounded periplasmic space (GO:0030288);|Cellular Component: periplasmic space (GO:0042597);|Molecular Function: scopolin beta-glucosidase ac…	bth:BT_4714	K05349	bglX	beta-glucosidase [EC:3.2.1.21]	ko00460,ko00500,ko00940	Cyanoamino acid metabolism|Starch and sucrose metabolism|Phenylpropanoid biosynthesis	TM0076	COG1472	Beta-glucosidase-related glycosidases	[G]
gene0870 1025895 1028207 k141_313111_length_415938_cov_34.1247_273 337765 340077	SBW07010.1	Beta-glucosidase BoGH3B [uncultured Dysgonomonas sp.]	A7LXU3.1	RecName: Full=Beta-glucosidase BoGH3B; AltName: Full=Glycosyl hydrolase family protein 3B; Short=BoGH3B; Flags: Precursor	Molecular Function: beta-glucosidase activity (GO:0008422);|Cellular Component: periplasmic space (GO:0042597);|Biological Process: symbiont process benefiting host (GO:0085030);|Molecular Function: scopolin beta-glucosidase activity (GO:0102483);|Biological Process: xyloglucan catabolic process (GO:2000899);	scn:Solca_0312	K05349	bglX	beta-glucosidase [EC:3.2.1.21]	ko00460,ko00500,ko00940	Cyanoamino acid metabolism|Starch and sucrose metabolism|Phenylpropanoid biosynthesis	TM0076	COG1472	Beta-glucosidase-related glycosidases	[G]
gene1145 1331111 1328658 k141_242411_length_405321_cov_26.7078_208 227043 224590	SHE34841.1	beta-glucosidase [Dysgonomonas macrotermitis]	P14002.2	RecName: Full=Thermostable beta-glucosidase B; AltName: Full=Beta-D-glucoside glucohydrolase; AltName: Full=Cellobiase; AltName: Full=Gentiobiase	Molecular Function: beta-glucosidase activity (GO:0008422);|Biological Process: cellulose catabolic process (GO:0030245);|Molecular Function: scopolin beta-glucosidase activity (GO:0102483);	fjo:Fjoh_3392	K05349	bglX	beta-glucosidase [EC:3.2.1.21]	ko00460,ko00500,ko00940	Cyanoamino acid metabolism|Starch and sucrose metabolism|Phenylpropanoid biosynthesis	TM0025	COG1472	Beta-glucosidase-related glycosidases	[G]
gene1543 1762041 1759846 k141_700252_length_295465_cov_28.0013_247 252652 250457	WP_163307674.1	glycosyl hydrolase [Dysgonomonas sp. 521]	D5EY15.1	RecName: Full=Xylan 1,4-beta-xylosidase; AltName: Full=1,4-beta-D-xylan xylohydrolase; AltName: Full=Alpha-L-arabinofuranosidase; Short=Arabinosidase; AltName: Full=Beta-D-xylosidase; AltName: Full=Exo-1,4-beta-xylosidase; Flags: Precursor	Molecular Function: xylan 1,4-beta-xylosidase activity (GO:0009044);|Biological Process: xylan catabolic process (GO:0045493);|Molecular Function: alpha-L-arabinofuranosidase activity (GO:0046556);	nso:NIASO_01805	K05349	bglX	beta-glucosidase [EC:3.2.1.21]	ko00460,ko00500,ko00940	Cyanoamino acid metabolism|Starch and sucrose metabolism|Phenylpropanoid biosynthesis	XF0845	COG1472	Beta-glucosidase-related glycosidases	[G]
gene1871 2176449 2174119 k141_544969_length_246703_cov_25.6337_71 86718 84388	WP_163219173.1	glycoside hydrolase family 3 protein [Bacteroides sp. 224]	Q46684.1	RecName: Full=Periplasmic beta-glucosidase/beta-xylosidase; Includes: RecName: Full=Beta-glucosidase; AltName: Full=Cellobiase; AltName: Full=Gentiobiase; Includes: RecName: Full=Beta-xylosidase; AltName: Full=1,4-beta-D-xylan xylohydrolase; AltName: Full=Xylan 1,4-beta-xylosidase; Flags: Precursor	Molecular Function: beta-glucosidase activity (GO:0008422);|Molecular Function: xylan 1,4-beta-xylosidase activity (GO:0009044);|Cellular Component: periplasmic space (GO:0042597);|Biological Process: xylan catabolic process (GO:0045493);|Molecular Function: scopolin beta-glucosidase activity (GO:0102483);	pcm:AY601_1938	K05349	bglX	beta-glucosidase [EC:3.2.1.21]	ko00460,ko00500,ko00940	Cyanoamino acid metabolism|Starch and sucrose metabolism|Phenylpropanoid biosynthesis	Cgl0317	COG1472	Beta-glucosidase-related glycosidases	[G]
gene1879 2186123 2184264 k141_544969_length_246703_cov_25.6337_79 96392 94533	WP_094996565.1	glycoside hydrolase family 3 protein [Maribacter cobaltidurans]	Q5BCC6.1	RecName: Full=Beta-glucosidase C; AltName: Full=Beta-D-glucoside glucohydrolase C; AltName: Full=Cellobiase C; AltName: Full=Gentiobiase C; Flags: Precursor	Cellular Component: extracellular region (GO:0005576);|Cellular Component: plasma membrane (GO:0005886);|Molecular Function: beta-glucosidase activity (GO:0008422);|Biological Process: glucan catabolic process (GO:0009251);|Biological Process: cellulose catabolic process (GO:0030245);|Molecular Function: scopolin beta-glucosidase activity (GO:0102483);	ttr:Tter_2344	K05349	bglX	beta-glucosidase [EC:3.2.1.21]	ko00460,ko00500,ko00940	Cyanoamino acid metabolism|Starch and sucrose metabolism|Phenylpropanoid biosynthesis	Cgl0317	COG1472	Beta-glucosidase-related glycosidases	[G]
gene2380 2747667 2749952 k141_776106_length_206780_cov_29.5341_155 192549 194834	WP_006843907.1	beta-glucosidase BglX [Dysgonomonas mossii]	Q56078.2	RecName: Full=Periplasmic beta-glucosidase; AltName: Full=Beta-D-glucoside glucohydrolase; AltName: Full=Cellobiase; AltName: Full=Gentiobiase; AltName: Full=T-cell inhibitor; Flags: Precursor	Cellular Component: plasma membrane (GO:0005886);|Molecular Function: beta-glucosidase activity (GO:0008422);|Biological Process: glucan catabolic process (GO:0009251);|Cellular Component: periplasmic space (GO:0042597);|Molecular Function: scopolin beta-glucosidase activity (GO:0102483);	bcel:BcellWH2_02291	K05349	bglX	beta-glucosidase [EC:3.2.1.21]	ko00460,ko00500,ko00940	Cyanoamino acid metabolism|Starch and sucrose metabolism|Phenylpropanoid biosynthesis	STM2166	COG1472	Beta-glucosidase-related glycosidases	[G]
gene2471 2846973 2849195 k141_279813_length_182023_cov_27.0292_79 85075 87297	WP_165021353.1	glycosyl hydrolase [Dysgonomonas sp. ZJ279]	A7LXS8.1	RecName: Full=Beta-glucosidase BoGH3A; AltName: Full=Glycosyl hydrolase family protein 3A; Short=BoGH3A; Flags: Precursor	Molecular Function: beta-glucosidase activity (GO:0008422);|Cellular Component: periplasmic space (GO:0042597);|Biological Process: symbiont process benefiting host (GO:0085030);|Molecular Function: scopolin beta-glucosidase activity (GO:0102483);|Biological Process: xyloglucan catabolic process (GO:2000899);	scn:Solca_0062	K05349	bglX	beta-glucosidase [EC:3.2.1.21]	ko00460,ko00500,ko00940	Cyanoamino acid metabolism|Starch and sucrose metabolism|Phenylpropanoid biosynthesis	YPO2803	COG1472	Beta-glucosidase-related glycosidases	[G]
PHG.bin.4
gene2375 2421400 2419103 k141_48446_length_6928_cov_229.5704_3 4184 1887	WP_095100773.1	MULTISPECIES: beta-glucosidase BglX [Enterobacteriaceae]	P33363.2	RecName: Full=Periplasmic beta-glucosidase; AltName: Full=Beta-D-glucoside glucohydrolase; AltName: Full=Cellobiase; AltName: Full=Gentiobiase; Flags: Precursor	Cellular Component: plasma membrane (GO:0005886);|Molecular Function: beta-glucosidase activity (GO:0008422);|Biological Process: glucan catabolic process (GO:0009251);|Molecular Function: glucosidase activity (GO:0015926);|Cellular Component: outer membrane-bounded periplasmic space (GO:0030288);|Cellular Component: periplasmic space (GO:0042597);|Molecular Function: scopolin beta-glucosidase ac…	ron:TE10_19655	K05349	bglX	beta-glucosidase [EC:3.2.1.21]	ko00460,ko00500,ko00940	Cyanoamino acid metabolism|Starch and sucrose metabolism|Phenylpropanoid biosynthesis	bglX	COG1472	Beta-glucosidase-related glycosidases	[G]
gene0037 35419 37068 k141_72682_length_37070_cov_112.7079_37 35419 37068	WP_095097043.1	MULTISPECIES: glycosyl hydrolase [Enterobacteriaceae]	P14002.2	RecName: Full=Thermostable beta-glucosidase B; AltName: Full=Beta-D-glucoside glucohydrolase; AltName: Full=Cellobiase; AltName: Full=Gentiobiase	Molecular Function: beta-glucosidase activity (GO:0008422);|Biological Process: cellulose catabolic process (GO:0030245);|Molecular Function: scopolin beta-glucosidase activity (GO:0102483);	ron:TE10_12500	K05349	bglX	beta-glucosidase [EC:3.2.1.21]	ko00460,ko00500,ko00940	Cyanoamino acid metabolism|Starch and sucrose metabolism|Phenylpropanoid biosynthesis	YPO2803	COG1472	Beta-glucosidase-related glycosidases	[G]
PHG.bin.6
gene3692 3405564 3403216 k141_234104_length_5463_cov_16.0000_5 5019 2671	WP_142461574.1	glycosyl hydrolase [Klebsiella michiganensis]	P14002.2	RecName: Full=Thermostable beta-glucosidase B; AltName: Full=Beta-D-glucoside glucohydrolase; AltName: Full=Cellobiase; AltName: Full=Gentiobiase	Molecular Function: beta-glucosidase activity (GO:0008422);|Biological Process: cellulose catabolic process (GO:0030245);|Molecular Function: scopolin beta-glucosidase activity (GO:0102483);	kok:KONIH1_12165	K05349	bglX	beta-glucosidase [EC:3.2.1.21]	ko00460,ko00500,ko00940	Cyanoamino acid metabolism|Starch and sucrose metabolism|Phenylpropanoid biosynthesis	YPO2803	COG1472	Beta-glucosidase-related glycosidases	[G]
gene4633 4244170 4242476 k141_548495_length_4129_cov_22.5218 1696 2	WP_139536584.1	beta-glucosidase BglX [Klebsiella michiganensis]	P33363.2	RecName: Full=Periplasmic beta-glucosidase; AltName: Full=Beta-D-glucoside glucohydrolase; AltName: Full=Cellobiase; AltName: Full=Gentiobiase; Flags: Precursor	Cellular Component: plasma membrane (GO:0005886);|Molecular Function: beta-glucosidase activity (GO:0008422);|Biological Process: glucan catabolic process (GO:0009251);|Molecular Function: glucosidase activity (GO:0015926);|Cellular Component: outer membrane-bounded periplasmic space (GO:0030288);|Cellular Component: periplasmic space (GO:0042597);|Molecular Function: scopolin beta-glucosidase ac…	kox:KOX_25615	K05349	bglX	beta-glucosidase [EC:3.2.1.21]	ko00460,ko00500,ko00940	Cyanoamino acid metabolism|Starch and sucrose metabolism|Phenylpropanoid biosynthesis	bglX	COG1472	Beta-glucosidase-related glycosidases	[G]
gene5855 5279066 5277105 k141_12644_length_2932_cov_19.8535_2 2394 433	TCT88040.1	beta-glucosidase [Gibbsiella quercinecans]	Q46684.1	RecName: Full=Periplasmic beta-glucosidase/beta-xylosidase; Includes: RecName: Full=Beta-glucosidase; AltName: Full=Cellobiase; AltName: Full=Gentiobiase; Includes: RecName: Full=Beta-xylosidase; AltName: Full=1,4-beta-D-xylan xylohydrolase; AltName: Full=Xylan 1,4-beta-xylosidase; Flags: Precursor	Molecular Function: beta-glucosidase activity (GO:0008422);|Molecular Function: xylan 1,4-beta-xylosidase activity (GO:0009044);|Cellular Component: periplasmic space (GO:0042597);|Biological Process: xylan catabolic process (GO:0045493);|Molecular Function: scopolin beta-glucosidase activity (GO:0102483);	pge:LG71_05115	K05349	bglX	beta-glucosidase [EC:3.2.1.21]	ko00460,ko00500,ko00940	Cyanoamino acid metabolism|Starch and sucrose metabolism|Phenylpropanoid biosynthesis	Cgl0317	COG1472	Beta-glucosidase-related glycosidases	[G]
gene5857 5279607 5280347 k141_70071_length_2927_cov_19.4749 3 743	WP_142462843.1	beta-glucosidase BglX [Klebsiella michiganensis]	P33363.2	RecName: Full=Periplasmic beta-glucosidase; AltName: Full=Beta-D-glucoside glucohydrolase; AltName: Full=Cellobiase; AltName: Full=Gentiobiase; Flags: Precursor	Cellular Component: plasma membrane (GO:0005886);|Molecular Function: beta-glucosidase activity (GO:0008422);|Biological Process: glucan catabolic process (GO:0009251);|Molecular Function: glucosidase activity (GO:0015926);|Cellular Component: outer membrane-bounded periplasmic space (GO:0030288);|Cellular Component: periplasmic space (GO:0042597);|Molecular Function: scopolin beta-glucosidase ac…	kok:KONIH1_19910	K05349	bglX	beta-glucosidase [EC:3.2.1.21]	ko00460,ko00500,ko00940	Cyanoamino acid metabolism|Starch and sucrose metabolism|Phenylpropanoid biosynthesis	bglX	COG1472	Beta-glucosidase-related glycosidases	[G]
PHG.bin.9
gene0957 1081353 1079206 k141_111291_length_40542_cov_32.2303_13 15935 13788	WP_087057570.1	beta-glucosidase [Marinilactibacillus psychrotolerans]	Q56078.2	RecName: Full=Periplasmic beta-glucosidase; AltName: Full=Beta-D-glucoside glucohydrolase; AltName: Full=Cellobiase; AltName: Full=Gentiobiase; AltName: Full=T-cell inhibitor; Flags: Precursor	Cellular Component: plasma membrane (GO:0005886);|Molecular Function: beta-glucosidase activity (GO:0008422);|Biological Process: glucan catabolic process (GO:0009251);|Cellular Component: periplasmic space (GO:0042597);|Molecular Function: scopolin beta-glucosidase activity (GO:0102483);	ega:AL523_11580	K05349	bglX	beta-glucosidase [EC:3.2.1.21]	ko00460,ko00500,ko00940	Cyanoamino acid metabolism|Starch and sucrose metabolism|Phenylpropanoid biosynthesis	lin1840	COG1472	Beta-glucosidase-related glycosidases	[G]
gene1027 1161955 1159724 k141_7733_length_38971_cov_41.6314_11 16685 14454	WP_137663193.1	beta-glucosidase BglX [Enterococcus sp. 190-7]	Q56078.2	RecName: Full=Periplasmic beta-glucosidase; AltName: Full=Beta-D-glucoside glucohydrolase; AltName: Full=Cellobiase; AltName: Full=Gentiobiase; AltName: Full=T-cell inhibitor; Flags: Precursor	Cellular Component: plasma membrane (GO:0005886);|Molecular Function: beta-glucosidase activity (GO:0008422);|Biological Process: glucan catabolic process (GO:0009251);|Cellular Component: periplasmic space (GO:0042597);|Molecular Function: scopolin beta-glucosidase activity (GO:0102483);	ess:ATZ33_10845	K05349	bglX	beta-glucosidase [EC:3.2.1.21]	ko00460,ko00500,ko00940	Cyanoamino acid metabolism|Starch and sucrose metabolism|Phenylpropanoid biosynthesis	lin1840	COG1472	Beta-glucosidase-related glycosidases	[G]
gene1522 1714026 1716176 k141_401764_length_27419_cov_41.5327_20 20447 22597	WP_060813246.1	hypothetical protein [Enterococcus gallinarum]	Q56078.2	RecName: Full=Periplasmic beta-glucosidase; AltName: Full=Beta-D-glucoside glucohydrolase; AltName: Full=Cellobiase; AltName: Full=Gentiobiase; AltName: Full=T-cell inhibitor; Flags: Precursor	Cellular Component: plasma membrane (GO:0005886);|Molecular Function: beta-glucosidase activity (GO:0008422);|Biological Process: glucan catabolic process (GO:0009251);|Cellular Component: periplasmic space (GO:0042597);|Molecular Function: scopolin beta-glucosidase activity (GO:0102483);	ecas:ECBG_01478	K05349	bglX	beta-glucosidase [EC:3.2.1.21]	ko00460,ko00500,ko00940	Cyanoamino acid metabolism|Starch and sucrose metabolism|Phenylpropanoid biosynthesis	lin1840	COG1472	Beta-glucosidase-related glycosidases	[G]
AHG.bin.4
gene0411 469141 467807 k141_319426_length_24738_cov_28.7339_16 19833 18499	WP_095847888.1	lysosomal glucosyl ceramidase [Gibbsiella quercinecans]	G5ECR8.1	RecName: Full=Putative glucosylceramidase 3; Flags: Precursor	Molecular Function: glucosylceramidase activity (GO:0004348);|Cellular Component: lysosome (GO:0005764);|Biological Process: glucosylceramide catabolic process (GO:0006680);	ecq:ECED1_0305	K01201	GBA, srfJ	glucosylceramidase [EC:3.2.1.45]	ko00511,ko00600,ko04142	Other glycan degradation|Sphingolipid metabolism|Lysosome	STM4426	COG5520	O-Glycosyl hydrolase	[M]
AHG.bin.5
gene2240 2380201 2381529 k141_488754_length_7478_cov_12.0000_6 5644 6972	WP_138403907.1	glycosyl hydrolase [Facklamia tabacinasalis]	Q4WBR2.1	RecName: Full=Endo-1,6-beta-D-glucanase neg1; AltName: Full=Beta-1,6-glucanase neg1; AltName: Full=Glucan endo-1,6-beta-glucosidase neg1; Flags: Precursor	Molecular Function: glucosylceramidase activity (GO:0004348);|Cellular Component: extracellular region (GO:0005576);|Biological Process: sphingolipid metabolic process (GO:0006665);|Molecular Function: glucan endo-1,6-beta-glucosidase activity (GO:0046557);	paej:H70737_10925	K01201	GBA, srfJ	glucosylceramidase [EC:3.2.1.45]	ko00511,ko00600,ko04142	Other glycan degradation|Sphingolipid metabolism|Lysosome	CC1757	COG5520	O-Glycosyl hydrolase	[M]
PHG.bin.2
gene2469 2843927 2845417 k141_279813_length_182023_cov_27.0292_77 82029 83519	WP_165021355.1	glucosylceramidase [Dysgonomonas sp. ZJ279]	Q7M4T0.2	RecName: Full=Endo-1,6-beta-D-glucanase; AltName: Full=Beta-1,6-glucanase Neg1; AltName: Full=Glucan endo-1,6-beta-glucosidase; Flags: Precursor	Molecular Function: glucosylceramidase activity (GO:0004348);|Cellular Component: extracellular region (GO:0005576);|Biological Process: sphingolipid metabolic process (GO:0006665);|Molecular Function: hydrolase activity (GO:0016787);|Molecular Function: glucan endo-1,6-beta-glucosidase activity (GO:0046557);	pdi:BDI_1787	K01201	GBA, srfJ	glucosylceramidase [EC:3.2.1.45]	ko00511,ko00600,ko04142	Other glycan degradation|Sphingolipid metabolism|Lysosome	CC1757	COG5520	O-Glycosyl hydrolase	[M]
PHG.bin.6
gene3717 3426809 3427780 k141_173168_length_5440_cov_32.0000_6 4467 5438	WP_095847888.1	lysosomal glucosyl ceramidase [Gibbsiella quercinecans]	Q9UB00.2	RecName: Full=Putative glucosylceramidase 4; Flags: Precursor	Molecular Function: glucosylceramidase activity (GO:0004348);|Cellular Component: lysosome (GO:0005764);|Biological Process: glucosylceramide catabolic process (GO:0006680);	ecq:ECED1_0305	K01201	GBA, srfJ	glucosylceramidase [EC:3.2.1.45]	ko00511,ko00600,ko04142	Other glycan degradation|Sphingolipid metabolism|Lysosome	STM4426	COG5520	O-Glycosyl hydrolase	[M]
gene0565 517691 516357 k141_357925_length_22079_cov_25.1808_8 10551 9217	WP_095847888.1	lysosomal glucosyl ceramidase [Gibbsiella quercinecans]	P17439.1	RecName: Full=Glucosylceramidase; AltName: Full=Acid beta-glucosidase; AltName: Full=Beta-glucocerebrosidase; AltName: Full=D-glucosyl-N-acylsphingosine glucohydrolase; Flags: Precursor	Molecular Function: glucosylceramidase activity (GO:0004348);|Molecular Function: receptor binding (GO:0005102);|Cellular Component: extracellular space (GO:0005615);|Cellular Component: lysosomal membrane (GO:0005765);|Biological Process: glucosylceramide catabolic process (GO:0006680);|Biological Process: cellular response to starvation (GO:0009267);|Biological Process: response to pH (GO:00092…	ecq:ECED1_0305	K01201	GBA, srfJ	glucosylceramidase [EC:3.2.1.45]	ko00511,ko00600,ko04142	Other glycan degradation|Sphingolipid metabolism|Lysosome	STM4426	COG5520	O-Glycosyl hydrolase	[M]
PHG.bin.9
gene0945 1067315 1065987 k141_111291_length_40542_cov_32.2303 1897 569	WP_138403907.1	glycosyl hydrolase [Facklamia tabacinasalis]	Q4WBR2.1	RecName: Full=Endo-1,6-beta-D-glucanase neg1; AltName: Full=Beta-1,6-glucanase neg1; AltName: Full=Glucan endo-1,6-beta-glucosidase neg1; Flags: Precursor	Molecular Function: glucosylceramidase activity (GO:0004348);|Cellular Component: extracellular region (GO:0005576);|Biological Process: sphingolipid metabolic process (GO:0006665);|Molecular Function: glucan endo-1,6-beta-glucosidase activity (GO:0046557);	paej:H70737_10925	K01201	GBA, srfJ	glucosylceramidase [EC:3.2.1.45]	ko00511,ko00600,ko04142	Other glycan degradation|Sphingolipid metabolism|Lysosome	CC1757	COG5520	O-Glycosyl hydrolase	[M]
AHG.bin.5
gene0085 106591 104975 k141_257365_length_45937_cov_15.4605_34 42786 41170	WP_118214698.1	alpha-glucosidase [Enterococcus casseliflavus]	Q54796.2	RecName: Full=Glucan 1,6-alpha-glucosidase; AltName: Full=Dextran glucosidase; AltName: Full=Exo-1,6-alpha-glucosidase; AltName: Full=Glucodextranase	Cellular Component: cytoplasm (GO:0005737);|Biological Process: carbohydrate metabolic process (GO:0005975);|Molecular Function: glucan 1,6-alpha-glucosidase activity (GO:0043896);	edu:LIU_13295	K01215	dexB	glucan 1,6-alpha-glucosidase [EC:3.2.1.70]			SP0342	COG0366	Glycosidases	[G]
PHG.bin.9
gene3100 3397535 3399151 k141_104073_length_4368_cov_52.4637_4 1707 3323	WP_118214698.1	alpha-glucosidase [Enterococcus casseliflavus]	Q54796.2	RecName: Full=Glucan 1,6-alpha-glucosidase; AltName: Full=Dextran glucosidase; AltName: Full=Exo-1,6-alpha-glucosidase; AltName: Full=Glucodextranase	Cellular Component: cytoplasm (GO:0005737);|Biological Process: carbohydrate metabolic process (GO:0005975);|Molecular Function: glucan 1,6-alpha-glucosidase activity (GO:0043896);	edu:LIU_13295	K01215	dexB	glucan 1,6-alpha-glucosidase [EC:3.2.1.70]			SP0342	COG0366	Glycosidases	[G]
AHG.bin.1
gene0190 210871 212241 k141_509498_length_80208_cov_43.6827_44 45023 46393	WP_095103132.1	MULTISPECIES: beta-glucosidase [Enterobacteriaceae]	P42403.1	RecName: Full=Aryl-phospho-beta-D-glucosidase BglC; AltName: Full=6-phospho-beta-glucosidase	Cellular Component: cytosol (GO:0005829);|Biological Process: carbohydrate metabolic process (GO:0005975);|Molecular Function: beta-glucosidase activity (GO:0008422);|Molecular Function: 6-phospho-beta-glucosidase activity (GO:0008706);|Molecular Function: methyl beta-D-glucoside 6-phosphate glucohydrolase activity (GO:0103047);|Biological Process: glycosyl compound metabolic process (GO:1901657);	ron:TE10_16070	K01223	E3.2.1.86B, bglA	6-phospho-beta-glucosidase [EC:3.2.1.86]	ko00010,ko00500	Glycolysis / Gluconeogenesis|Starch and sucrose metabolism	CAC0385	COG2723	Beta-glucosidase/6-phospho-beta-glucosidase/beta-galactosidase	[G]
gene1037 1116473 1115079 k141_473671_length_56391_cov_41.0319_47 46218 44824	WP_095100760.1	MULTISPECIES: 6-phospho-beta-glucosidase [Enterobacteriaceae]	Q48409.1	RecName: Full=Phospho-cellobiase	Molecular Function: hydrolase activity, hydrolyzing O-glycosyl compounds (GO:0004553);|Biological Process: carbohydrate metabolic process (GO:0005975);	ron:TE10_19700	K01223	E3.2.1.86B, bglA	6-phospho-beta-glucosidase [EC:3.2.1.86]	ko00010,ko00500	Glycolysis / Gluconeogenesis|Starch and sucrose metabolism	bglB	COG2723	Beta-glucosidase/6-phospho-beta-glucosidase/beta-galactosidase	[G]
gene1178 1284924 1283482 k141_75931_length_52563_cov_41.3929_46 49383 47941	WP_095094613.1	MULTISPECIES: glycoside hydrolase family 1 protein [Enterobacteriaceae]	P11988.2	RecName: Full=6-phospho-beta-glucosidase BglB; AltName: Full=Phospho-beta-glucosidase B	Molecular Function: hydrolase activity, hydrolyzing O-glycosyl compounds (GO:0004553);|Cellular Component: cytosol (GO:0005829);|Biological Process: carbohydrate metabolic process (GO:0005975);|Molecular Function: beta-glucosidase activity (GO:0008422);|Molecular Function: 6-phospho-beta-glucosidase activity (GO:0008706);|Molecular Function: methyl beta-D-glucoside 6-phosphate glucohydrolase acti…	blh:BaLi_c28580	K01223	E3.2.1.86B, bglA	6-phospho-beta-glucosidase [EC:3.2.1.86]	ko00010,ko00500	Glycolysis / Gluconeogenesis|Starch and sucrose metabolism	lin0918	COG2723	Beta-glucosidase/6-phospho-beta-glucosidase/beta-galactosidase	[G]
gene1844 2010566 2009133 k141_45083_length_41576_cov_50.6610_22 23548 22115	WP_095099227.1	MULTISPECIES: 6-phospho-beta-glucosidase [Enterobacteriaceae]	Q46829.2	RecName: Full=6-phospho-beta-glucosidase BglA; AltName: Full=Phospho-beta-glucosidase A	Cellular Component: cytosol (GO:0005829);|Biological Process: carbohydrate metabolic process (GO:0005975);|Molecular Function: beta-glucosidase activity (GO:0008422);|Molecular Function: 6-phospho-beta-glucosidase activity (GO:0008706);|Molecular Function: glucosidase activity (GO:0015926);|Molecular Function: methyl beta-D-glucoside 6-phosphate glucohydrolase activity (GO:0103047);|Biological Pr…	ron:TE10_23565	K01223	E3.2.1.86B, bglA	6-phospho-beta-glucosidase [EC:3.2.1.86]	ko00010,ko00500	Glycolysis / Gluconeogenesis|Starch and sucrose metabolism	STM3051	COG2723	Beta-glucosidase/6-phospho-beta-glucosidase/beta-galactosidase	[G]
gene2032 2205546 2204119 k141_67069_length_40244_cov_73.2853_13 13802 12375	WP_095100074.1	MULTISPECIES: glycoside hydrolase family 1 protein [Enterobacteriaceae]	O05508.1	RecName: Full=6-phospho-beta-glucosidase GmuD; AltName: Full=Aryl-phospho-beta-D-glucosidase BglD; AltName: Full=Glucomannan utilization protein D	Biological Process: polysaccharide catabolic process (GO:0000272);|Cellular Component: cytosol (GO:0005829);|Molecular Function: beta-glucosidase activity (GO:0008422);|Molecular Function: 6-phospho-beta-glucosidase activity (GO:0008706);|Molecular Function: methyl beta-D-glucoside 6-phosphate glucohydrolase activity (GO:0103047);|Biological Process: glycosyl compound metabolic process (GO:190165…	ron:TE10_22945	K01223	E3.2.1.86B, bglA	6-phospho-beta-glucosidase [EC:3.2.1.86]	ko00010,ko00500	Glycolysis / Gluconeogenesis|Starch and sucrose metabolism	SPy1599	COG2723	Beta-glucosidase/6-phospho-beta-glucosidase/beta-galactosidase	[G]
gene3083 3323643 3322213 k141_79032_length_25831_cov_46.9248_22 25200 23770	WP_095100354.1	MULTISPECIES: 6-phospho-beta-glucosidase [Enterobacteriaceae]	Q46829.2	RecName: Full=6-phospho-beta-glucosidase BglA; AltName: Full=Phospho-beta-glucosidase A	Cellular Component: cytosol (GO:0005829);|Biological Process: carbohydrate metabolic process (GO:0005975);|Molecular Function: beta-glucosidase activity (GO:0008422);|Molecular Function: 6-phospho-beta-glucosidase activity (GO:0008706);|Molecular Function: glucosidase activity (GO:0015926);|Molecular Function: methyl beta-D-glucoside 6-phosphate glucohydrolase activity (GO:0103047);|Biological Pr…	ron:TE10_20970	K01223	E3.2.1.86B, bglA	6-phospho-beta-glucosidase [EC:3.2.1.86]	ko00010,ko00500	Glycolysis / Gluconeogenesis|Starch and sucrose metabolism	SP0303	COG2723	Beta-glucosidase/6-phospho-beta-glucosidase/beta-galactosidase	[G]
gene3252 3504820 3506244 k141_361375_length_23274_cov_67.9220_6 7024 8448	WP_159236142.1	MULTISPECIES: 6-phospho-beta-glucosidase [unclassified Raoultella]	P24240.2	RecName: Full=6-phospho-beta-glucosidase AscB	Cellular Component: cytosol (GO:0005829);|Molecular Function: beta-glucosidase activity (GO:0008422);|Molecular Function: 6-phospho-beta-glucosidase activity (GO:0008706);|Molecular Function: methyl beta-D-glucoside 6-phosphate glucohydrolase activity (GO:0103047);|Biological Process: glycosyl compound metabolic process (GO:1901657);|Biological Process: cellobiose catabolic process (GO:2000892);	ron:TE10_22140	K01223	E3.2.1.86B, bglA	6-phospho-beta-glucosidase [EC:3.2.1.86]	ko00010,ko00500	Glycolysis / Gluconeogenesis|Starch and sucrose metabolism	ascB	COG2723	Beta-glucosidase/6-phospho-beta-glucosidase/beta-galactosidase	[G]
gene3551 3817965 3816592 k141_204788_length_21232_cov_56.1817_6 8867 7494	WP_095095409.1	MULTISPECIES: glycoside hydrolase family 1 protein [Enterobacteriaceae]	P42973.1	RecName: Full=Aryl-phospho-beta-D-glucosidase BglA; AltName: Full=6-phospho-beta-glucosidase	Cellular Component: cytosol (GO:0005829);|Biological Process: carbohydrate metabolic process (GO:0005975);|Molecular Function: beta-glucosidase activity (GO:0008422);|Molecular Function: 6-phospho-beta-glucosidase activity (GO:0008706);|Molecular Function: methyl beta-D-glucoside 6-phosphate glucohydrolase activity (GO:0103047);|Biological Process: glycosyl compound metabolic process (GO:1901657);	ebf:D782_3005	K01223	E3.2.1.86B, bglA	6-phospho-beta-glucosidase [EC:3.2.1.86]	ko00010,ko00500	Glycolysis / Gluconeogenesis|Starch and sucrose metabolism	L32812	COG2723	Beta-glucosidase/6-phospho-beta-glucosidase/beta-galactosidase	[G]
AHG.bin.4
gene0631 712749 714179 k141_174968_length_19976_cov_40.3256_19 16510 17940	WP_095844698.1	6-phospho-beta-glucosidase [Gibbsiella quercinecans]	Q46829.2	RecName: Full=6-phospho-beta-glucosidase BglA; AltName: Full=Phospho-beta-glucosidase A	Cellular Component: cytosol (GO:0005829);|Biological Process: carbohydrate metabolic process (GO:0005975);|Molecular Function: beta-glucosidase activity (GO:0008422);|Molecular Function: 6-phospho-beta-glucosidase activity (GO:0008706);|Molecular Function: glucosidase activity (GO:0015926);|Molecular Function: methyl beta-D-glucoside 6-phosphate glucohydrolase activity (GO:0103047);|Biological Pr…	kok:KONIH1_21380	K01223	E3.2.1.86B, bglA	6-phospho-beta-glucosidase [EC:3.2.1.86]	ko00010,ko00500	Glycolysis / Gluconeogenesis|Starch and sucrose metabolism	SP0303	COG2723	Beta-glucosidase/6-phospho-beta-glucosidase/beta-galactosidase	[G]
gene1950 2102940 2104343 k141_30516_length_8704_cov_83.4907_4 3803 5206	WP_095846411.1	6-phospho-beta-glucosidase [Gibbsiella quercinecans]	Q48409.1	RecName: Full=Phospho-cellobiase	Molecular Function: hydrolase activity, hydrolyzing O-glycosyl compounds (GO:0004553);|Biological Process: carbohydrate metabolic process (GO:0005975);	srl:SOD_c00840	K01223	E3.2.1.86B, bglA	6-phospho-beta-glucosidase [EC:3.2.1.86]	ko00010,ko00500	Glycolysis / Gluconeogenesis|Starch and sucrose metabolism	bglB	COG2723	Beta-glucosidase/6-phospho-beta-glucosidase/beta-galactosidase	[G]
gene3772 3882909 3884345 k141_392580_length_3017_cov_92.2962_2 450 1886	WP_121555010.1	glycoside hydrolase family 1 protein [Gibbsiella quercinecans]	P40740.2	RecName: Full=Aryl-phospho-beta-D-glucosidase BglH; AltName: Full=6-phospho-beta-glucosidase	Cellular Component: cytosol (GO:0005829);|Biological Process: carbohydrate metabolic process (GO:0005975);|Molecular Function: beta-glucosidase activity (GO:0008422);|Molecular Function: 6-phospho-beta-glucosidase activity (GO:0008706);|Molecular Function: methyl beta-D-glucoside 6-phosphate glucohydrolase activity (GO:0103047);|Biological Process: glycosyl compound metabolic process (GO:1901657);	rah:Rahaq_4887	K01223	E3.2.1.86B, bglA	6-phospho-beta-glucosidase [EC:3.2.1.86]	ko00010,ko00500	Glycolysis / Gluconeogenesis|Starch and sucrose metabolism	L89194	COG2723	Beta-glucosidase/6-phospho-beta-glucosidase/beta-galactosidase	[G]
AHG.bin.5
gene0295 319920 318484 k141_12555_length_30371_cov_17.0000_19 20865 19429	WP_033594451.1	glycoside hydrolase family 1 protein [Enterococcus faecalis]	P40740.2	RecName: Full=Aryl-phospho-beta-D-glucosidase BglH; AltName: Full=6-phospho-beta-glucosidase	Cellular Component: cytosol (GO:0005829);|Biological Process: carbohydrate metabolic process (GO:0005975);|Molecular Function: beta-glucosidase activity (GO:0008422);|Molecular Function: 6-phospho-beta-glucosidase activity (GO:0008706);|Molecular Function: methyl beta-D-glucoside 6-phosphate glucohydrolase activity (GO:0103047);|Biological Process: glycosyl compound metabolic process (GO:1901657);	efq:DR75_1304	K01223	E3.2.1.86B, bglA	6-phospho-beta-glucosidase [EC:3.2.1.86]	ko00010,ko00500	Glycolysis / Gluconeogenesis|Starch and sucrose metabolism	L89194	COG2723	Beta-glucosidase/6-phospho-beta-glucosidase/beta-galactosidase	[G]
gene0406 442763 441372 k141_127528_length_25780_cov_11.0000_24 24927 23536	WP_069635094.1	glycoside hydrolase family 1 protein [Enterococcus quebecensis]	P42403.1	RecName: Full=Aryl-phospho-beta-D-glucosidase BglC; AltName: Full=6-phospho-beta-glucosidase	Cellular Component: cytosol (GO:0005829);|Biological Process: carbohydrate metabolic process (GO:0005975);|Molecular Function: beta-glucosidase activity (GO:0008422);|Molecular Function: 6-phospho-beta-glucosidase activity (GO:0008706);|Molecular Function: methyl beta-D-glucoside 6-phosphate glucohydrolase activity (GO:0103047);|Biological Process: glycosyl compound metabolic process (GO:1901657);	ess:ATZ33_13000	K01223	E3.2.1.86B, bglA	6-phospho-beta-glucosidase [EC:3.2.1.86]	ko00010,ko00500	Glycolysis / Gluconeogenesis|Starch and sucrose metabolism	CAP0010	COG2723	Beta-glucosidase/6-phospho-beta-glucosidase/beta-galactosidase	[G]
gene0516 553135 551711 k141_434511_length_23829_cov_21.7428_12 10373 8949	WP_069662979.1	glycoside hydrolase family 1 protein [Enterococcus termitis]	P40740.2	RecName: Full=Aryl-phospho-beta-D-glucosidase BglH; AltName: Full=6-phospho-beta-glucosidase	Cellular Component: cytosol (GO:0005829);|Biological Process: carbohydrate metabolic process (GO:0005975);|Molecular Function: beta-glucosidase activity (GO:0008422);|Molecular Function: 6-phospho-beta-glucosidase activity (GO:0008706);|Molecular Function: methyl beta-D-glucoside 6-phosphate glucohydrolase activity (GO:0103047);|Biological Process: glycosyl compound metabolic process (GO:1901657);	ess:ATZ33_12080	K01223	E3.2.1.86B, bglA	6-phospho-beta-glucosidase [EC:3.2.1.86]	ko00010,ko00500	Glycolysis / Gluconeogenesis|Starch and sucrose metabolism	CAC1405	COG2723	Beta-glucosidase/6-phospho-beta-glucosidase/beta-galactosidase	[G]
gene0560 608454 607021 k141_411592_length_21741_cov_12.0000_15 19492 18059	WP_005472947.1	MULTISPECIES: glycoside hydrolase family 1 protein [Enterococcus]	P42403.1	RecName: Full=Aryl-phospho-beta-D-glucosidase BglC; AltName: Full=6-phospho-beta-glucosidase	Cellular Component: cytosol (GO:0005829);|Biological Process: carbohydrate metabolic process (GO:0005975);|Molecular Function: beta-glucosidase activity (GO:0008422);|Molecular Function: 6-phospho-beta-glucosidase activity (GO:0008706);|Molecular Function: methyl beta-D-glucoside 6-phosphate glucohydrolase activity (GO:0103047);|Biological Process: glycosyl compound metabolic process (GO:1901657);	ecas:ECBG_01291	K01223	E3.2.1.86B, bglA	6-phospho-beta-glucosidase [EC:3.2.1.86]	ko00010,ko00500	Glycolysis / Gluconeogenesis|Starch and sucrose metabolism	L179659	COG2723	Beta-glucosidase/6-phospho-beta-glucosidase/beta-galactosidase	[G]
gene0629 677016 678449 k141_455305_length_19987_cov_19.0000_3 3114 4547	WP_005225329.1	family 1 glycosylhydrolase [Enterococcus casseliflavus]	P40740.2	RecName: Full=Aryl-phospho-beta-D-glucosidase BglH; AltName: Full=6-phospho-beta-glucosidase	Cellular Component: cytosol (GO:0005829);|Biological Process: carbohydrate metabolic process (GO:0005975);|Molecular Function: beta-glucosidase activity (GO:0008422);|Molecular Function: 6-phospho-beta-glucosidase activity (GO:0008706);|Molecular Function: methyl beta-D-glucoside 6-phosphate glucohydrolase activity (GO:0103047);|Biological Process: glycosyl compound metabolic process (GO:1901657);	ecas:ECBG_00180	K01223	E3.2.1.86B, bglA	6-phospho-beta-glucosidase [EC:3.2.1.86]	ko00010,ko00500	Glycolysis / Gluconeogenesis|Starch and sucrose metabolism	BS_bglH	COG2723	Beta-glucosidase/6-phospho-beta-glucosidase/beta-galactosidase	[G]
gene0967 1046118 1047560 k141_226564_length_14888_cov_17.0000_10 10078 11520	WP_081116684.1	glycoside hydrolase family 1 protein [Enterococcus casseliflavus]	P40740.2	RecName: Full=Aryl-phospho-beta-D-glucosidase BglH; AltName: Full=6-phospho-beta-glucosidase	Cellular Component: cytosol (GO:0005829);|Biological Process: carbohydrate metabolic process (GO:0005975);|Molecular Function: beta-glucosidase activity (GO:0008422);|Molecular Function: 6-phospho-beta-glucosidase activity (GO:0008706);|Molecular Function: methyl beta-D-glucoside 6-phosphate glucohydrolase activity (GO:0103047);|Biological Process: glycosyl compound metabolic process (GO:1901657);	ecas:ECBG_01213	K01223	E3.2.1.86B, bglA	6-phospho-beta-glucosidase [EC:3.2.1.86]	ko00010,ko00500	Glycolysis / Gluconeogenesis|Starch and sucrose metabolism	lin0918	COG2723	Beta-glucosidase/6-phospho-beta-glucosidase/beta-galactosidase	[G]
gene1130 1219434 1217968 k141_476265_length_13461_cov_14.0173_8 13331 11865	WP_086299326.1	MULTISPECIES: glycoside hydrolase family 1 protein [Enterococcus]	P40740.2	RecName: Full=Aryl-phospho-beta-D-glucosidase BglH; AltName: Full=6-phospho-beta-glucosidase	Cellular Component: cytosol (GO:0005829);|Biological Process: carbohydrate metabolic process (GO:0005975);|Molecular Function: beta-glucosidase activity (GO:0008422);|Molecular Function: 6-phospho-beta-glucosidase activity (GO:0008706);|Molecular Function: methyl beta-D-glucoside 6-phosphate glucohydrolase activity (GO:0103047);|Biological Process: glycosyl compound metabolic process (GO:1901657);	ega:AL523_15735	K01223	E3.2.1.86B, bglA	6-phospho-beta-glucosidase [EC:3.2.1.86]	ko00010,ko00500	Glycolysis / Gluconeogenesis|Starch and sucrose metabolism	lin0288	COG2723	Beta-glucosidase/6-phospho-beta-glucosidase/beta-galactosidase	[G]
gene1293 1399076 1399783 k141_66164_length_12354_cov_11.0000 2 709	WP_126823541.1	6-phospho-beta-glucosidase [Vagococcus entomophilus]	Q46829.2	RecName: Full=6-phospho-beta-glucosidase BglA; AltName: Full=Phospho-beta-glucosidase A	Cellular Component: cytosol (GO:0005829);|Biological Process: carbohydrate metabolic process (GO:0005975);|Molecular Function: beta-glucosidase activity (GO:0008422);|Molecular Function: 6-phospho-beta-glucosidase activity (GO:0008706);|Molecular Function: glucosidase activity (GO:0015926);|Molecular Function: methyl beta-D-glucoside 6-phosphate glucohydrolase activity (GO:0103047);|Biological Pr…	emu:EMQU_0024	K01223	E3.2.1.86B, bglA	6-phospho-beta-glucosidase [EC:3.2.1.86]	ko00010,ko00500	Glycolysis / Gluconeogenesis|Starch and sucrose metabolism	ZbglA	COG2723	Beta-glucosidase/6-phospho-beta-glucosidase/beta-galactosidase	[G]
gene1367 1479181 1480611 k141_94746_length_11974_cov_10.0000_6 6596 8026	WP_008378424.1	MULTISPECIES: 6-phospho-beta-glucosidase [Enterococcus]	P24240.2	RecName: Full=6-phospho-beta-glucosidase AscB	Cellular Component: cytosol (GO:0005829);|Molecular Function: beta-glucosidase activity (GO:0008422);|Molecular Function: 6-phospho-beta-glucosidase activity (GO:0008706);|Molecular Function: methyl beta-D-glucoside 6-phosphate glucohydrolase activity (GO:0103047);|Biological Process: glycosyl compound metabolic process (GO:1901657);|Biological Process: cellobiose catabolic process (GO:2000892);	ecas:ECBG_00699	K01223	E3.2.1.86B, bglA	6-phospho-beta-glucosidase [EC:3.2.1.86]	ko00010,ko00500	Glycolysis / Gluconeogenesis|Starch and sucrose metabolism	L121426	COG2723	Beta-glucosidase/6-phospho-beta-glucosidase/beta-galactosidase	[G]
gene1403 1510367 1511800 k141_272159_length_11847_cov_8.0000_3 2033 3466	WP_067393009.1	6-phospho-beta-glucosidase [Enterococcus canis]	P42973.1	RecName: Full=Aryl-phospho-beta-D-glucosidase BglA; AltName: Full=6-phospho-beta-glucosidase	Cellular Component: cytosol (GO:0005829);|Biological Process: carbohydrate metabolic process (GO:0005975);|Molecular Function: beta-glucosidase activity (GO:0008422);|Molecular Function: 6-phospho-beta-glucosidase activity (GO:0008706);|Molecular Function: methyl beta-D-glucoside 6-phosphate glucohydrolase activity (GO:0103047);|Biological Process: glycosyl compound metabolic process (GO:1901657);	thl:TEH_10930	K01223	E3.2.1.86B, bglA	6-phospho-beta-glucosidase [EC:3.2.1.86]	ko00010,ko00500	Glycolysis / Gluconeogenesis|Starch and sucrose metabolism	L22116	COG2723	Beta-glucosidase/6-phospho-beta-glucosidase/beta-galactosidase	[G]
gene1622 1744109 1742721 k141_462529_length_10185_cov_8.0000_4 4643 3255	WP_086269326.1	glycoside hydrolase family 1 protein [Enterococcus gallinarum]	O05508.1	RecName: Full=6-phospho-beta-glucosidase GmuD; AltName: Full=Aryl-phospho-beta-D-glucosidase BglD; AltName: Full=Glucomannan utilization protein D	Biological Process: polysaccharide catabolic process (GO:0000272);|Cellular Component: cytosol (GO:0005829);|Molecular Function: beta-glucosidase activity (GO:0008422);|Molecular Function: 6-phospho-beta-glucosidase activity (GO:0008706);|Molecular Function: methyl beta-D-glucoside 6-phosphate glucohydrolase activity (GO:0103047);|Biological Process: glycosyl compound metabolic process (GO:190165…	ecas:ECBG_01295	K01223	E3.2.1.86B, bglA	6-phospho-beta-glucosidase [EC:3.2.1.86]	ko00010,ko00500	Glycolysis / Gluconeogenesis|Starch and sucrose metabolism	BS_ydhP	COG2723	Beta-glucosidase/6-phospho-beta-glucosidase/beta-galactosidase	[G]
gene1795 1918871 1920310 k141_35947_length_9419_cov_10.0000_3 2738 4177	WP_138371324.1	MULTISPECIES: 6-phospho-beta-glucosidase [Enterococcus]	P42973.1	RecName: Full=Aryl-phospho-beta-D-glucosidase BglA; AltName: Full=6-phospho-beta-glucosidase	Cellular Component: cytosol (GO:0005829);|Biological Process: carbohydrate metabolic process (GO:0005975);|Molecular Function: beta-glucosidase activity (GO:0008422);|Molecular Function: 6-phospho-beta-glucosidase activity (GO:0008706);|Molecular Function: methyl beta-D-glucoside 6-phosphate glucohydrolase activity (GO:0103047);|Biological Process: glycosyl compound metabolic process (GO:1901657);	emu:EMQU_0024	K01223	E3.2.1.86B, bglA	6-phospho-beta-glucosidase [EC:3.2.1.86]	ko00010,ko00500	Glycolysis / Gluconeogenesis|Starch and sucrose metabolism	BS_bglA	COG2723	Beta-glucosidase/6-phospho-beta-glucosidase/beta-galactosidase	[G]
gene1807 1933518 1934897 k141_137624_length_9407_cov_12.0000_7 7966 9345	WP_088745514.1	glycoside hydrolase family 1 protein [Enterococcus hirae]	O05508.1	RecName: Full=6-phospho-beta-glucosidase GmuD; AltName: Full=Aryl-phospho-beta-D-glucosidase BglD; AltName: Full=Glucomannan utilization protein D	Biological Process: polysaccharide catabolic process (GO:0000272);|Cellular Component: cytosol (GO:0005829);|Molecular Function: beta-glucosidase activity (GO:0008422);|Molecular Function: 6-phospho-beta-glucosidase activity (GO:0008706);|Molecular Function: methyl beta-D-glucoside 6-phosphate glucohydrolase activity (GO:0103047);|Biological Process: glycosyl compound metabolic process (GO:190165…	ehr:EHR_13245	K01223	E3.2.1.86B, bglA	6-phospho-beta-glucosidase [EC:3.2.1.86]	ko00010,ko00500	Glycolysis / Gluconeogenesis|Starch and sucrose metabolism	lin0583	COG2723	Beta-glucosidase/6-phospho-beta-glucosidase/beta-galactosidase	[G]
gene1818 1946615 1945242 k141_169921_length_9363_cov_9.0000_2 2280 907	WP_126810095.1	glycoside hydrolase family 1 protein [Vagococcus elongatus]	P42403.1	RecName: Full=Aryl-phospho-beta-D-glucosidase BglC; AltName: Full=6-phospho-beta-glucosidase	Cellular Component: cytosol (GO:0005829);|Biological Process: carbohydrate metabolic process (GO:0005975);|Molecular Function: beta-glucosidase activity (GO:0008422);|Molecular Function: 6-phospho-beta-glucosidase activity (GO:0008706);|Molecular Function: methyl beta-D-glucoside 6-phosphate glucohydrolase activity (GO:0103047);|Biological Process: glycosyl compound metabolic process (GO:1901657);	eft:M395_04960	K01223	E3.2.1.86B, bglA	6-phospho-beta-glucosidase [EC:3.2.1.86]	ko00010,ko00500	Glycolysis / Gluconeogenesis|Starch and sucrose metabolism	CAP0010	COG2723	Beta-glucosidase/6-phospho-beta-glucosidase/beta-galactosidase	[G]
gene1820 1949749 1948364 k141_169921_length_9363_cov_9.0000_4 5414 4029	WP_161902381.1	family 1 glycosylhydrolase [Enterococcus sp. CU12B]	P42403.1	RecName: Full=Aryl-phospho-beta-D-glucosidase BglC; AltName: Full=6-phospho-beta-glucosidase	Cellular Component: cytosol (GO:0005829);|Biological Process: carbohydrate metabolic process (GO:0005975);|Molecular Function: beta-glucosidase activity (GO:0008422);|Molecular Function: 6-phospho-beta-glucosidase activity (GO:0008706);|Molecular Function: methyl beta-D-glucoside 6-phosphate glucohydrolase activity (GO:0103047);|Biological Process: glycosyl compound metabolic process (GO:1901657);	mpx:MPD5_1704	K01223	E3.2.1.86B, bglA	6-phospho-beta-glucosidase [EC:3.2.1.86]	ko00010,ko00500	Glycolysis / Gluconeogenesis|Starch and sucrose metabolism	CAP0010	COG2723	Beta-glucosidase/6-phospho-beta-glucosidase/beta-galactosidase	[G]
gene1823 1952958 1951549 k141_169921_length_9363_cov_9.0000_7 8623 7214	EAC5069837.1	glycoside hydrolase family 1 protein [Listeria monocytogenes]	P42403.1	RecName: Full=Aryl-phospho-beta-D-glucosidase BglC; AltName: Full=6-phospho-beta-glucosidase	Cellular Component: cytosol (GO:0005829);|Biological Process: carbohydrate metabolic process (GO:0005975);|Molecular Function: beta-glucosidase activity (GO:0008422);|Molecular Function: 6-phospho-beta-glucosidase activity (GO:0008706);|Molecular Function: methyl beta-D-glucoside 6-phosphate glucohydrolase activity (GO:0103047);|Biological Process: glycosyl compound metabolic process (GO:1901657);	lmot:LMOSLCC2540_2814	K01223	E3.2.1.86B, bglA	6-phospho-beta-glucosidase [EC:3.2.1.86]	ko00010,ko00500	Glycolysis / Gluconeogenesis|Starch and sucrose metabolism	lin2904	COG2723	Beta-glucosidase/6-phospho-beta-glucosidase/beta-galactosidase	[G]
gene2112 2238764 2237373 k141_249270_length_8161_cov_21.3323_5 5122 3731	WP_061100842.1	glycoside hydrolase family 1 protein [Enterococcus faecalis]	P42403.1	RecName: Full=Aryl-phospho-beta-D-glucosidase BglC; AltName: Full=6-phospho-beta-glucosidase	Cellular Component: cytosol (GO:0005829);|Biological Process: carbohydrate metabolic process (GO:0005975);|Molecular Function: beta-glucosidase activity (GO:0008422);|Molecular Function: 6-phospho-beta-glucosidase activity (GO:0008706);|Molecular Function: methyl beta-D-glucoside 6-phosphate glucohydrolase activity (GO:0103047);|Biological Process: glycosyl compound metabolic process (GO:1901657);	ehr:EHR_10955	K01223	E3.2.1.86B, bglA	6-phospho-beta-glucosidase [EC:3.2.1.86]	ko00010,ko00500	Glycolysis / Gluconeogenesis|Starch and sucrose metabolism	CAP0010	COG2723	Beta-glucosidase/6-phospho-beta-glucosidase/beta-galactosidase	[G]
gene2209 2343155 2344417 k141_63958_length_7665_cov_11.0000_5 6403 7665	WP_101703208.1	family 1 glycosylhydrolase [Carnobacterium maltaromaticum]	P40740.2	RecName: Full=Aryl-phospho-beta-D-glucosidase BglH; AltName: Full=6-phospho-beta-glucosidase	Cellular Component: cytosol (GO:0005829);|Biological Process: carbohydrate metabolic process (GO:0005975);|Molecular Function: beta-glucosidase activity (GO:0008422);|Molecular Function: 6-phospho-beta-glucosidase activity (GO:0008706);|Molecular Function: methyl beta-D-glucoside 6-phosphate glucohydrolase activity (GO:0103047);|Biological Process: glycosyl compound metabolic process (GO:1901657);	efm:M7W_547	K01223	E3.2.1.86B, bglA	6-phospho-beta-glucosidase [EC:3.2.1.86]	ko00010,ko00500	Glycolysis / Gluconeogenesis|Starch and sucrose metabolism	lin0288	COG2723	Beta-glucosidase/6-phospho-beta-glucosidase/beta-galactosidase	[G]
gene2212 2347325 2345865 k141_407875_length_7585_cov_9.0000_3 2908 1448	WP_086350556.1	glycoside hydrolase family 1 protein [Enterococcus sp. 9E7_DIV0242]	P40740.2	RecName: Full=Aryl-phospho-beta-D-glucosidase BglH; AltName: Full=6-phospho-beta-glucosidase	Cellular Component: cytosol (GO:0005829);|Biological Process: carbohydrate metabolic process (GO:0005975);|Molecular Function: beta-glucosidase activity (GO:0008422);|Molecular Function: 6-phospho-beta-glucosidase activity (GO:0008706);|Molecular Function: methyl beta-D-glucoside 6-phosphate glucohydrolase activity (GO:0103047);|Biological Process: glycosyl compound metabolic process (GO:1901657);	efu:HMPREF0351_12922	K01223	E3.2.1.86B, bglA	6-phospho-beta-glucosidase [EC:3.2.1.86]	ko00010,ko00500	Glycolysis / Gluconeogenesis|Starch and sucrose metabolism	lin0288	COG2723	Beta-glucosidase/6-phospho-beta-glucosidase/beta-galactosidase	[G]
gene2329 2469760 2468309 k141_39253_length_7148_cov_47.0000_6 7078 5627	WP_120194979.1	glycoside hydrolase family 1 protein [Lacrimispora algidixylanolytica]	Q46130.1	RecName: Full=6-phospho-beta-glucosidase	Biological Process: carbohydrate metabolic process (GO:0005975);|Molecular Function: 6-phospho-beta-glucosidase activity (GO:0008706);|Molecular Function: methyl beta-D-glucoside 6-phosphate glucohydrolase activity (GO:0103047);	ppy:PPE_03372	K01223	E3.2.1.86B, bglA	6-phospho-beta-glucosidase [EC:3.2.1.86]	ko00010,ko00500	Glycolysis / Gluconeogenesis|Starch and sucrose metabolism	CAC1405	COG2723	Beta-glucosidase/6-phospho-beta-glucosidase/beta-galactosidase	[G]
gene2458 2596244 2594829 k141_160102_length_6382_cov_13.9226_4 4849 3434	WP_137605955.1	glycoside hydrolase family 1 protein [Enterococcus sp. 85-4]	P42403.1	RecName: Full=Aryl-phospho-beta-D-glucosidase BglC; AltName: Full=6-phospho-beta-glucosidase	Cellular Component: cytosol (GO:0005829);|Biological Process: carbohydrate metabolic process (GO:0005975);|Molecular Function: beta-glucosidase activity (GO:0008422);|Molecular Function: 6-phospho-beta-glucosidase activity (GO:0008706);|Molecular Function: methyl beta-D-glucoside 6-phosphate glucohydrolase activity (GO:0103047);|Biological Process: glycosyl compound metabolic process (GO:1901657);	cbe:Cbei_4643	K01223	E3.2.1.86B, bglA	6-phospho-beta-glucosidase [EC:3.2.1.86]	ko00010,ko00500	Glycolysis / Gluconeogenesis|Starch and sucrose metabolism	CAP0010	COG2723	Beta-glucosidase/6-phospho-beta-glucosidase/beta-galactosidase	[G]
gene2573 2711524 2710106 k141_87456_length_6031_cov_10.0000_2 1928 510	WP_081131268.1	glycoside hydrolase family 1 protein [Enterococcus gallinarum]	O05508.1	RecName: Full=6-phospho-beta-glucosidase GmuD; AltName: Full=Aryl-phospho-beta-D-glucosidase BglD; AltName: Full=Glucomannan utilization protein D	Biological Process: polysaccharide catabolic process (GO:0000272);|Cellular Component: cytosol (GO:0005829);|Molecular Function: beta-glucosidase activity (GO:0008422);|Molecular Function: 6-phospho-beta-glucosidase activity (GO:0008706);|Molecular Function: methyl beta-D-glucoside 6-phosphate glucohydrolase activity (GO:0103047);|Biological Process: glycosyl compound metabolic process (GO:190165…	ega:AL523_09740	K01223	E3.2.1.86B, bglA	6-phospho-beta-glucosidase [EC:3.2.1.86]	ko00010,ko00500	Glycolysis / Gluconeogenesis|Starch and sucrose metabolism	BH3918	COG2723	Beta-glucosidase/6-phospho-beta-glucosidase/beta-galactosidase	[G]
gene2877 2987849 2989315 k141_126302_length_4584_cov_14.7353_6 3116 4582	WP_086299920.1	family 1 glycosylhydrolase [Enterococcus faecium]	P40740.2	RecName: Full=Aryl-phospho-beta-D-glucosidase BglH; AltName: Full=6-phospho-beta-glucosidase	Cellular Component: cytosol (GO:0005829);|Biological Process: carbohydrate metabolic process (GO:0005975);|Molecular Function: beta-glucosidase activity (GO:0008422);|Molecular Function: 6-phospho-beta-glucosidase activity (GO:0008706);|Molecular Function: methyl beta-D-glucoside 6-phosphate glucohydrolase activity (GO:0103047);|Biological Process: glycosyl compound metabolic process (GO:1901657);	bpj:B2904_orf318	K01223	E3.2.1.86B, bglA	6-phospho-beta-glucosidase [EC:3.2.1.86]	ko00010,ko00500	Glycolysis / Gluconeogenesis|Starch and sucrose metabolism	lin0288	COG2723	Beta-glucosidase/6-phospho-beta-glucosidase/beta-galactosidase	[G]
gene3375 3430147 3429464 k141_435810_length_2813_cov_8.0000 685 2	WP_126823541.1	6-phospho-beta-glucosidase [Vagococcus entomophilus]	P42973.1	RecName: Full=Aryl-phospho-beta-D-glucosidase BglA; AltName: Full=6-phospho-beta-glucosidase	Cellular Component: cytosol (GO:0005829);|Biological Process: carbohydrate metabolic process (GO:0005975);|Molecular Function: beta-glucosidase activity (GO:0008422);|Molecular Function: 6-phospho-beta-glucosidase activity (GO:0008706);|Molecular Function: methyl beta-D-glucoside 6-phosphate glucohydrolase activity (GO:0103047);|Biological Process: glycosyl compound metabolic process (GO:1901657);	cml:BN424_3032	K01223	E3.2.1.86B, bglA	6-phospho-beta-glucosidase [EC:3.2.1.86]	ko00010,ko00500	Glycolysis / Gluconeogenesis|Starch and sucrose metabolism	L22116	COG2723	Beta-glucosidase/6-phospho-beta-glucosidase/beta-galactosidase	[G]
FG.bin.1
gene0890 952243 950816 k141_15461_length_29261_cov_77.7250_13 14224 12797	WP_095100074.1	MULTISPECIES: glycoside hydrolase family 1 protein [Enterobacteriaceae]	O05508.1	RecName: Full=6-phospho-beta-glucosidase GmuD; AltName: Full=Aryl-phospho-beta-D-glucosidase BglD; AltName: Full=Glucomannan utilization protein D	Biological Process: polysaccharide catabolic process (GO:0000272);|Cellular Component: cytosol (GO:0005829);|Molecular Function: beta-glucosidase activity (GO:0008422);|Molecular Function: 6-phospho-beta-glucosidase activity (GO:0008706);|Molecular Function: methyl beta-D-glucoside 6-phosphate glucohydrolase activity (GO:0103047);|Biological Process: glycosyl compound metabolic process (GO:190165…	ron:TE10_22945	K01223	E3.2.1.86B, bglA	6-phospho-beta-glucosidase [EC:3.2.1.86]	ko00010,ko00500	Glycolysis / Gluconeogenesis|Starch and sucrose metabolism	SPy1599	COG2723	Beta-glucosidase/6-phospho-beta-glucosidase/beta-galactosidase	[G]
gene1500 1598807 1600177 k141_383004_length_21859_cov_60.5613_14 13584 14954	WP_095103132.1	MULTISPECIES: beta-glucosidase [Enterobacteriaceae]	P42403.1	RecName: Full=Aryl-phospho-beta-D-glucosidase BglC; AltName: Full=6-phospho-beta-glucosidase	Cellular Component: cytosol (GO:0005829);|Biological Process: carbohydrate metabolic process (GO:0005975);|Molecular Function: beta-glucosidase activity (GO:0008422);|Molecular Function: 6-phospho-beta-glucosidase activity (GO:0008706);|Molecular Function: methyl beta-D-glucoside 6-phosphate glucohydrolase activity (GO:0103047);|Biological Process: glycosyl compound metabolic process (GO:1901657);	ron:TE10_16070	K01223	E3.2.1.86B, bglA	6-phospho-beta-glucosidase [EC:3.2.1.86]	ko00010,ko00500	Glycolysis / Gluconeogenesis|Starch and sucrose metabolism	CAC0385	COG2723	Beta-glucosidase/6-phospho-beta-glucosidase/beta-galactosidase	[G]
gene2404 2571358 2572752 k141_29442_length_14977_cov_61.6227_5 5750 7144	WP_095100760.1	MULTISPECIES: 6-phospho-beta-glucosidase [Enterobacteriaceae]	Q48409.1	RecName: Full=Phospho-cellobiase	Molecular Function: hydrolase activity, hydrolyzing O-glycosyl compounds (GO:0004553);|Biological Process: carbohydrate metabolic process (GO:0005975);	ron:TE10_19700	K01223	E3.2.1.86B, bglA	6-phospho-beta-glucosidase [EC:3.2.1.86]	ko00010,ko00500	Glycolysis / Gluconeogenesis|Starch and sucrose metabolism	bglB	COG2723	Beta-glucosidase/6-phospho-beta-glucosidase/beta-galactosidase	[G]
[truncated: 95 more rows]

## Sheet: CAZY annotation
AHG bin.1
Cluster_id	Family	Evalue	Covered_Fraction	Class	Class_Definition	CAZy_Activities
[truncated: 189 more rows]

## Sheet: Nitrogen Fixation
AHG.bin.1
[truncated: 151 more rows]
