# Supplementary material for: Gut microbiota contributes to lignocellulose deconstruction and nitrogen fixation of the larva of Apriona swainsoni
Source: Front Physiol. 2022 Dec 23;13:1072893. doi: 10.3389/fphys.2022.1072893 (PMC9816477; doi:10.3389/fphys.2022.1072893)
Supplement: Supplementary file 2 [file Table3.XLSX]

## Sheet: Figure 3A raw data
Metabolites	2MG	3MG	4MG	5MG	2FG	3FG	4FG	5FG	2AHG	3AHG	4AHG	5AHG	2PHG	3PHG	4PHG	5PHG
LysoPC(18:1(9Z))	2.70293e+07	5.41853e+07	4.70524e+07	2.45112e+07	6.95872e+07	7.11731e+07	6.29946e+07	3.90301e+07	2.22693e+08	2.12099e+08	2.70836e+08	3.25723e+08	5.45808e+06	8.23677e+07	1.89568e+07	8.88509e+07
LysoPC(18:2(9Z,12Z))	7.12821e+06	7.78573e+06	1.55991e+07	3.1764e+06	1.78328e+07	2.36127e+07	2.20201e+07	1.24573e+07	1.1857e+08	1.3049e+08	1.40741e+08	1.77797e+08	3.52485e+06	4.04394e+07	1.09688e+07	3.99192e+07
LysoPC(18:1(11Z))	1.60839e+07	3.49854e+07	2.83955e+07	1.94549e+07	5.06374e+07	4.69826e+07	4.37821e+07	2.67847e+07	1.10646e+08	1.04693e+08	1.33777e+08	1.46095e+08	709745	1.96344e+07	4.06537e+06	1.55831e+07
Gluconic acid	6.71429e+07	4.65136e+07	5.69786e+07	5.77723e+07	5.24661e+07	4.66824e+07	4.05154e+07	5.66812e+07	1.69888e+07	1.51906e+07	2.27591e+07	1.49617e+07	6.46234e+06	5.86267e+06	9.89274e+06	5.18744e+06
PE(18:1(11Z)/0:0)	1.62913e+07	3.31524e+07	1.98769e+07	1.60252e+07	3.20073e+07	2.96803e+07	2.33097e+07	1.72171e+07	8.40308e+07	1.05343e+08	1.00173e+08	9.48187e+07	2.3202e+06	4.53691e+07	8.36825e+06	4.45662e+07
4-(2-Aminophenyl)-2,4-dioxobutanoic acid	3.94471e+06	1.65749e+06	519955	2.62533e+06	2.21375e+06	1.50383e+06	1.24671e+06	2.72717e+06	2.37042e+07	8.99118e+06	9.79637e+06	2.17801e+07	3.43058e+07	4.87187e+07	4.0906e+07	6.08643e+07
PE(0:0/18:2(9Z,12Z))	5.95048e+06	8.10773e+06	1.02388e+07	3.65694e+06	1.21991e+07	1.3649e+07	1.05453e+07	7.38053e+06	6.21918e+07	8.49076e+07	7.32228e+07	8.06443e+07	2.13909e+06	3.07061e+07	6.28984e+06	3.06149e+07
3,4-Dihydro-2H-1-benzopyran-2-one	5.57751e+07	5.85577e+07	6.11926e+07	4.97206e+07	4.30416e+07	5.32347e+07	5.83978e+07	5.22806e+07	4.93085e+07	3.44147e+07	6.28739e+07	5.33897e+07	1.13327e+07	1.83822e+07	1.58598e+07	1.21515e+07
3-O-a-L-Fucopyranosyl-D-glucose	1.24161e+07	1.65246e+07	1.69716e+07	3.0103e+06	3.51622e+07	3.38865e+07	4.28122e+07	1.24808e+07	2.68701e+07	1.85348e+07	3.37011e+07	3.65764e+07	1.25785e+07	1.19448e+07	1.10235e+07	1.19291e+07
L-Alloisoleucine	6.11603e+07	6.3451e+07	6.69884e+07	5.65167e+07	5.50164e+07	6.44022e+07	7.28818e+07	5.96367e+07	6.12796e+07	4.93339e+07	7.74513e+07	7.50785e+07	1.85254e+07	2.98638e+07	2.22056e+07	1.86611e+07
2-linoleoyl-sn-glycero-3-phosphocholine	3.94649e+06	5.14292e+06	1.01275e+07	2.70065e+06	1.31683e+07	1.59948e+07	1.68907e+07	8.35938e+06	4.99061e+07	5.26169e+07	5.98384e+07	7.60384e+07	359745	7.91244e+06	1.87904e+06	6.09201e+06
6-{[(3,4,5-trihydroxy-6-methyloxan-2-yl)oxy]methyl}oxane-2,3,4,5-tetrol	6.62933e+06	1.03993e+07	9.54811e+06	1.54758e+06	2.61757e+07	2.43543e+07	2.60825e+07	1.04087e+07	2.28064e+07	1.98703e+07	2.3919e+07	2.96849e+07	7.56791e+06	9.60428e+06	1.10495e+07	7.19706e+06
PE(18:1(9Z)/0:0)	1.11018e+07	2.45586e+07	1.40242e+07	1.27826e+07	2.56757e+07	2.27921e+07	1.97351e+07	1.30771e+07	5.08349e+07	6.19294e+07	5.4706e+07	5.49045e+07	434262	1.14957e+07	2.07796e+06	8.90118e+06
DL-Histidinol	4.49828e+07	3.75244e+07	5.10385e+07	3.88018e+07	5.39456e+07	5.47583e+07	8.12523e+07	4.78402e+07	7.13915e+07	6.40193e+07	8.56403e+07	9.97415e+07	3.14591e+07	3.89766e+07	4.1811e+07	3.58461e+07
LysoPE(18:2(9Z,12Z)/0:0)	3.62404e+06	5.22998e+06	6.67431e+06	2.99631e+06	7.14148e+06	8.4898e+06	7.73907e+06	4.79983e+06	2.89025e+07	4.19101e+07	3.49457e+07	3.7821e+07	317032	6.51911e+06	1.57548e+06	5.35593e+06
L-Proline	3.18324e+07	3.36327e+07	4.17815e+07	3.59864e+07	4.02804e+07	4.78734e+07	6.50648e+07	4.09774e+07	4.92035e+07	5.16733e+07	7.02442e+07	7.72091e+07	2.42955e+07	3.12966e+07	3.23838e+07	2.4989e+07
Adenosine	3.6345e+06	4.17024e+06	1.1387e+07	351588	5.88583e+06	8.08971e+06	3.65628e+07	908319	4.35172e+07	3.26962e+07	6.69927e+07	1.14201e+07	2.4539e+07	3.76854e+07	2.91729e+07	2.32176e+07
PC(17:0/0:0)	8.75423e+06	1.6474e+07	2.82156e+07	1.70546e+07	2.90496e+07	2.60536e+07	3.71568e+07	1.84991e+07	2.84177e+07	2.82271e+07	4.32705e+07	4.35637e+07	504335	1.15779e+07	3.81069e+06	9.39309e+06
LysoPE(0:0/18:2(9Z,12Z))	3.63326e+06	3.95519e+06	5.32298e+06	1.86531e+06	5.47103e+06	6.12606e+06	3.95585e+06	3.3535e+06	2.50237e+07	3.19052e+07	3.34756e+07	3.25816e+07	828068	1.05094e+07	2.58444e+06	1.10133e+07
PC(18:0/0:0)	3.92138e+06	4.57319e+06	4.3314e+06	2.74171e+06	1.99524e+07	1.09389e+07	8.76646e+06	5.45022e+06	9.31692e+06	8.83297e+06	3.36251e+06	9.18975e+06	12559	692633	52116.2	629199
5′-Deoxy-5′-<WBR>(methylthio)adenosine	9.92192e+06	4.76182e+06	4.87368e+06	9.74578e+06	1.19787e+06	1.41076e+06	2.57721e+06	3.01708e+06	2.95013e+06	1.10273e+06	3.87179e+06	6.93114e+06	20495	82958.4	21710.6	31859.9
Kynurenic acid	2.15622e+06	929808	237411	1.37047e+06	988831	673338	470859	1.18499e+06	9.93232e+06	3.38731e+06	4.32873e+06	9.27825e+06	1.1396e+07	1.92891e+07	1.53842e+07	2.08937e+07
PC(18:2(2E,4E)/0:0)	2.54882e+06	2.22199e+06	4.8847e+06	1.01369e+06	4.94879e+06	7.38825e+06	5.58753e+06	3.48841e+06	2.50451e+07	2.25666e+07	3.59821e+07	3.99524e+07	875889	8.14388e+06	2.46845e+06	7.32255e+06
2-Hydroxycinnamic acid	735277	1.08366e+07	1.01451e+07	4.18819e+06	323339	852984	4.16938e+06	1.97383e+06	9.00246e+06	5.96047e+06	1.58528e+07	2.4377e+07	316014	2.21787e+06	823719	2.70422e+06
Zidovudine	9.77767e+06	1.29684e+07	2.05e+07	1.71277e+06	1.59211e+07	2.10682e+07	3.72315e+07	4.067e+06	2.88301e+07	2.07873e+07	4.58396e+07	3.86203e+07	4.28643e+06	8.75799e+06	5.11721e+06	3.64605e+06
Indoleacrylic acid	3.38699e+07	3.75251e+07	4.03485e+07	3.13927e+07	3.14018e+07	3.511e+07	4.63738e+07	3.4274e+07	4.56247e+07	3.17588e+07	6.5841e+07	5.78765e+07	1.89764e+07	2.88322e+07	2.37508e+07	2.0167e+07
PC(18:1(6Z)/0:0)	6.41858e+06	1.02466e+07	1.02872e+07	6.0098e+06	1.1672e+07	1.36206e+07	1.05842e+07	7.50817e+06	2.66482e+07	2.36292e+07	3.55353e+07	3.93379e+07	957126	9.42199e+06	3.29407e+06	8.98873e+06
LysoPE(18:1(9Z)/0:0)	7.39678e+06	1.30642e+07	8.32023e+06	7.13381e+06	1.03368e+07	1.10251e+07	7.10275e+06	6.17099e+06	2.33679e+07	2.22991e+07	2.74201e+07	2.93525e+07	760507	1.12188e+07	2.65694e+06	1.07376e+07
PC(16:1(9Z)/0:0)	1.03413e+06	2.42873e+06	1.77e+06	794338	2.10021e+06	2.48604e+06	1.59678e+06	1.5211e+06	1.64511e+07	1.57189e+07	2.00309e+07	2.4732e+07	711602	4.28037e+06	1.2247e+06	6.05986e+06
Riboflavin (Vitamin B2)	4.8423e+06	1.25186e+06	2.71588e+06	1.81526e+06	7.54534e+06	7.28241e+06	1.17049e+07	1.00438e+07	1.5422e+07	2.09384e+07	3.26321e+07	2.49007e+07	1.0698e+06	2.93835e+06	3.376e+06	1.81065e+06
Cellulose, microcrystalline	4.49104e+06	5.80898e+06	4.41642e+06	1.19349e+06	1.09373e+07	1.14163e+07	1.12162e+07	4.32682e+06	8.51949e+06	6.2129e+06	1.0078e+07	1.15186e+07	2.17649e+06	2.67555e+06	2.49893e+06	1.87905e+06
6-{[3-(6,7-dimethoxy-2H-1,3-benzodioxol-5-yl)prop-2-enoyl]oxy}-3,4,5-trihydroxyoxane-2-carboxylic acid	4.92861e+06	6.55369e+06	7.07232e+06	9.75906e+06	5.77471e+06	8.31146e+06	1.16373e+07	1.34319e+07	1.64879e+06	2.70993e+06	5.52802e+06	9.75431e+06	529875	457473	548801	1.12458e+06
p-Hydroxytriamterene glucuronide	606646	1.20754e+06	1.15202e+06	117811	5.10207e+06	5.64351e+06	5.2091e+06	1.59007e+06	3.15758e+06	2.20169e+06	3.18912e+06	3.24568e+06	305593	409288	444887	177733
LysoPE(0:0/18:1(9Z))	6.66576e+06	1.05769e+07	6.24072e+06	7.3054e+06	1.06841e+07	9.96161e+06	7.36533e+06	5.87476e+06	1.62395e+07	1.88352e+07	2.03788e+07	2.06813e+07	167284	4.12622e+06	836765	3.19224e+06
1-Pentanesulfenothioic acid	1.70381e+06	2.74532e+06	2.39234e+06	1.48479e+06	6.01965e+06	6.64943e+06	6.19829e+06	3.90465e+06	4.17224e+06	4.28423e+06	4.31022e+06	4.85071e+06	477585	657430	941193	920861
PC(0:0/18:1(9Z))	5.00212e+06	8.61309e+06	6.61556e+06	5.39781e+06	1.04775e+07	9.78047e+06	9.38985e+06	6.37074e+06	1.87774e+07	1.55108e+07	2.54389e+07	2.43452e+07	197886	3.38573e+06	871615	2.63741e+06
Artonol C	1.44643e+07	5.64858e+06	8.56795e+06	9.82e+06	1.30124e+07	8.44729e+06	1.30531e+07	1.1013e+07	5.40962e+06	3.0286e+06	4.20143e+06	2.7703e+06	4.85962e+06	4.41975e+06	2.42627e+06	1.77072e+06
6-O-b-D-Fructofuranosyl-2-deoxy-D-glucose	1.55021e+06	2.49867e+06	2.7981e+06	450920	7.09483e+06	7.44811e+06	9.6423e+06	2.96722e+06	7.24542e+06	1.0602e+07	1.03928e+07	1.24708e+07	4.51463e+06	5.69017e+06	6.71395e+06	3.98638e+06
PC(18:2(9Z,12Z)/0:0)[U]	1.8439e+06	1.92859e+06	3.33392e+06	1.16048e+06	4.42042e+06	5.39877e+06	4.09766e+06	2.7502e+06	1.54696e+07	1.34405e+07	1.69711e+07	2.11973e+07	123600	2.00905e+06	646368	1.63574e+06
3-(4-hydroxy-3,5-dimethoxyphenyl)-1-(2,4,6-trihydroxy-3-methoxyphenyl)propane-1,2-dione	1.89837e+06	3.14809e+06	2.05411e+06	387408	7.14237e+06	6.66588e+06	6.8765e+06	2.40929e+06	5.07804e+06	4.90363e+06	6.17401e+06	5.82218e+06	848737	1.28791e+06	1.20819e+06	882204
LysoPE(18:0/0:0)	1.74119e+06	2.49626e+06	2.74582e+06	1.3277e+06	1.06776e+07	4.67506e+06	4.95927e+06	3.38199e+06	5.17577e+06	4.53665e+06	1.99777e+06	6.48759e+06	17343.5	307068	36021.8	518470
Riboflavin	4.26846e+06	921208	1.90988e+06	1.38336e+06	5.66163e+06	5.9599e+06	7.60949e+06	8.51987e+06	1.04554e+07	1.32116e+07	2.46361e+07	1.76561e+07	396284	1.24362e+06	1.54701e+06	751909
Oxoglutaric acid	2.56316e+06	2.35273e+06	1.6295e+06	1.79894e+06	5.80552e+06	5.18118e+06	7.64568e+06	3.59985e+06	2.61532e+06	3.08917e+06	7.18779e+06	5.54485e+06	810778	1.40129e+06	2.73724e+06	1.44934e+06
LysoPC(16:0)	860138	1.9235e+06	1.87713e+06	690173	2.42032e+06	2.55602e+06	1.95376e+06	879728	1.21042e+07	1.1766e+07	1.42967e+07	1.35221e+07	138850	3.68166e+06	401702	3.81126e+06
OG-PA	2.23833e+06	2.15845e+06	2.36781e+06	1.00441e+06	1.94799e+06	2.31281e+06	1.74074e+06	1.38056e+06	1.00759e+07	1.41625e+07	1.40717e+07	1.03134e+07	849240	6.09751e+06	1.44538e+06	5.77918e+06
3,5-Dihydroxyphenyl 1-O-(6-O-galloyl-beta-D-glucopyranoside)	3.42121e+06	3.74021e+06	9.04209e+06	1.95634e+06	5.33621e+06	3.43919e+06	9.37173e+06	1.87639e+06	1.40117e+07	8.1858e+06	2.85597e+07	1.7144e+07	2.67642e+06	2.2353e+06	4.22629e+06	4.64168e+06
N-(1-Deoxy-1-fructosyl)isoleucine	4.53519e+06	5.6555e+06	1.19478e+07	4.20364e+06	7.38537e+06	5.63562e+06	1.61338e+07	4.23552e+06	9.57623e+06	4.57863e+06	2.27279e+07	1.57384e+07	466673	464279	1.65663e+06	436335
Vat Yellow 4	355977	113621	18149.7	161762	122991	70317.6	36751	148657	2.76421e+06	643326	740725	2.2636e+06	4.78621e+06	8.50259e+06	5.99933e+06	9.8484e+06
p-CHLOROPHENYLALANINE	9.51199e+06	9.48253e+06	1.08774e+07	9.7597e+06	1.43373e+07	1.39077e+07	1.83494e+07	1.21818e+07	1.72582e+07	1.62104e+07	2.14803e+07	2.36776e+07	8.64076e+06	1.15144e+07	9.8024e+06	8.34764e+06
Neohesperidose	588835	1.05669e+06	1.04997e+06	124316	4.35898e+06	4.01889e+06	5.90542e+06	1.45526e+06	3.91014e+06	3.95985e+06	4.58981e+06	5.49445e+06	2.05348e+06	2.84939e+06	3.15387e+06	1.69732e+06
LysoPC(0:0/16:0)	1.27704e+06	2.48403e+06	3.01953e+06	998194	9.62904e+06	5.34195e+06	5.91138e+06	2.49165e+06	7.4685e+06	6.82415e+06	6.13222e+06	8.71275e+06	23818	746560	82398.5	609247
11-Hydroxyprogesterone 11-glucuronide	2.67898e+06	1.32326e+06	2.14003e+06	2.88103e+06	96685	233036	84736.4	294611	197509	172331	237377	122298	8499.29	18313.5	5615.31	6122.67
PE(16:1(9Z)/0:0)	946152	2.90304e+06	1.0589e+06	775965	1.47757e+06	1.48178e+06	871822	1.01195e+06	8.30988e+06	9.54738e+06	9.01686e+06	1.06368e+07	379429	2.5352e+06	630473	3.50475e+06
LysoPC(18:3(6Z,9Z,12Z))	337346	276341	599211	101188	718816	1.01656e+06	797986	475906	8.07224e+06	8.23546e+06	9.501e+06	1.36408e+07	359115	2.56643e+06	587253	2.55949e+06
L-Valine	9.98513e+06	1.19611e+07	1.26236e+07	1.02901e+07	1.01939e+07	1.22524e+07	1.39136e+07	1.15097e+07	1.21476e+07	1.10165e+07	1.64144e+07	1.874e+07	4.15297e+06	6.44069e+06	5.62233e+06	4.97727e+06
Glycerol 2-(9Z,12Z-octadecadienoate) 1-hexadecanoate 3-O-[alpha-D-galactopyranosyl-(1->6)-beta-D-galactopyranoside]	303033	446615	574438	127776	778616	861410	509050	371581	7.47911e+06	1.12228e+07	7.4999e+06	8.05139e+06	54254.7	3.07331e+06	291211	3.44163e+06
L-Histidinol	1.09613e+07	1.02227e+07	1.17941e+07	9.10873e+06	1.24661e+07	1.28229e+07	1.78253e+07	1.28983e+07	1.69062e+07	1.76026e+07	2.00348e+07	2.49072e+07	7.95964e+06	9.85936e+06	9.33422e+06	7.65648e+06
Basellasaponin C	908819	21953	2.75739e+06	1.28742e+06	4.53948e+06	3.80909e+06	5.18165e+06	4.50847e+06	5.22129e+06	4.80148e+06	7.71544e+06	7.93278e+06	966670	1.71112e+06	1.90312e+06	1.30228e+06
N-isobutyl-2E,4Z-octadecadienoyl amine	1.6581e+06	3.98936e+06	6.5514e+06	2.72122e+06	1.45684e+06	1.98901e+06	2.88337e+06	1.5417e+06	1.72e+06	974103	1.48526e+06	3.22631e+06	1248.65	208705	7443.31	69388
LysoPC(20:2(11Z,14Z))	183835	375900	487641	134102	556354	732660	553872	363212	8.02374e+06	7.33569e+06	7.69245e+06	7.40317e+06	10940.9	691334	126538	713776
THTC	5.28941e+06	4.99183e+06	5.98926e+06	4.52494e+06	3.46074e+06	4.12824e+06	3.71813e+06	4.23952e+06	2.64258e+06	567372	1.97063e+06	1.43422e+06	169563	495175	171151	214308
Methyl 5-(1-Propynyl)-2-thiophenepropanoate	447781	187800	55357.9	295970	251241	167617	135645	308989	2.75943e+06	1.04225e+06	1.11599e+06	2.49626e+06	3.97201e+06	5.5793e+06	4.78671e+06	7.10032e+06
Salannin	1.31296e+06	1.36608e+06	1.62646e+06	777962	1.43279e+06	1.79524e+06	1.59894e+06	1.20109e+06	6.99614e+06	1.03913e+07	9.85258e+06	8.49368e+06	981051	4.59448e+06	1.46337e+06	4.30206e+06
Choline	5.79108e+06	6.73453e+06	7.78385e+06	6.16525e+06	9.00536e+06	1.0667e+07	1.15684e+07	7.62586e+06	1.17856e+07	1.23192e+07	1.57877e+07	1.33632e+07	5.05415e+06	6.53837e+06	6.2672e+06	3.91074e+06
SC-57666	1.55495e+06	3.89933e+06	1.95559e+06	321519	4.73342e+06	6.90077e+06	6.19206e+06	2.20803e+06	4.95162e+06	6.86104e+06	6.83622e+06	8.87142e+06	662732	1.53648e+06	1.13934e+06	616471
L-Glutamic acid	6.43193e+06	7.3019e+06	9.22742e+06	8.16629e+06	8.49824e+06	9.75093e+06	1.31441e+07	9.01918e+06	6.51305e+06	8.39051e+06	1.2613e+07	1.24256e+07	4.09203e+06	5.42692e+06	6.41787e+06	5.25275e+06
Basellasaponin D	2.19897e+06	200450	3.19571e+06	2.5749e+06	4.69795e+06	4.68146e+06	5.69304e+06	4.48365e+06	5.52943e+06	6.48884e+06	8.42542e+06	8.28648e+06	1.41218e+06	2.11961e+06	2.27261e+06	1.64736e+06
2-C-Methyl-D-erythritol 4-phosphate	3.20295e+06	4.08611e+06	4.14078e+06	2.61094e+06	4.04487e+06	5.99624e+06	7.20319e+06	2.66807e+06	8.62673e+06	8.61839e+06	1.28014e+07	1.6871e+07	1.37917e+06	3.09187e+06	2.49209e+06	1.58968e+06
12-Hydroxynevirapine glucuronide	2.51125e+06	3.02951e+06	3.52125e+06	514945	3.76451e+06	4.47241e+06	4.56414e+06	2.19265e+06	2.42233e+06	349418	1.92017e+06	1.35019e+06	238738	708758	150901	231590
LysoPE(0:0/18:3(9Z,12Z,15Z))	440321	433831	592880	165712	715379	888044	561136	478907	5.3881e+06	7.71404e+06	6.7317e+06	8.15877e+06	308081	2.6975e+06	543031	2.74608e+06
L-Lysine	5.58087e+06	5.71789e+06	7.32974e+06	4.39914e+06	4.36896e+06	5.46605e+06	6.85168e+06	4.61696e+06	5.91595e+06	4.7935e+06	7.27632e+06	6.25818e+06	1.23739e+06	2.29066e+06	1.60587e+06	1.01009e+06
PC(16:1(9E)/0:0)	657362	1.78871e+06	1.23663e+06	796866	1.93875e+06	1.88982e+06	1.49758e+06	1.29975e+06	6.73708e+06	6.73793e+06	7.28772e+06	1.02043e+07	74395.9	586909	204159	582080
Eszopiclone	5.99971e+06	6.51963e+06	8.09649e+06	7.25329e+06	8.87813e+06	9.42663e+06	1.18324e+07	8.42386e+06	1.01537e+07	1.05843e+07	1.44665e+07	1.64457e+07	5.31836e+06	6.37525e+06	6.63017e+06	5.34237e+06
PS(18:1(9Z)/0:0)	4.93167e+06	6.42982e+06	3.85935e+06	3.79739e+06	4.81001e+06	3.97729e+06	4.08684e+06	2.87496e+06	4.69459e+06	5.07646e+06	5.58819e+06	4.24098e+06	130407	2.08625e+06	423965	1.59225e+06
3-methyl sulfolene	4.26796e+06	3.86425e+06	4.57658e+06	3.57187e+06	2.77633e+06	3.24575e+06	2.94156e+06	3.65872e+06	2.04351e+06	361222	1.36553e+06	960764	130468	382328	132671	168257
Ethyl (S)-3-hydroxybutyrate glucoside	888066	1.95582e+06	1.32137e+06	208718	3.1259e+06	4.21423e+06	4.04648e+06	1.12073e+06	2.47613e+06	3.00438e+06	4.26069e+06	2.99676e+06	1.09197e+06	2.11196e+06	1.75388e+06	863490
23-Hydroxyphysalolactone	1.82312e+06	1.55592e+06	734147	2.04677e+06	134374	296972	67206.2	287110	79497.1	223530	405144	73760.3	6464.09	39959.5	6177.77	29542.4
N-[(3a,5b,7a,12a)-3,12-dihydroxy-24-oxo-7-(sulfooxy)cholan-24-yl]-Glycine	1.79992e+06	917347	1.08529e+06	1.89001e+06	74122.6	156381	78905.6	175676	118736	96118	140638	96567.1	7241.18	10316.3	9779.05	7403.28
Glycerophosphocholine	9.02859e+06	8.64634e+06	6.56531e+06	7.54105e+06	6.29746e+06	7.55917e+06	1.02307e+07	7.54777e+06	8.13293e+06	6.48075e+06	1.32315e+07	1.15795e+07	3.21164e+06	5.43425e+06	4.80425e+06	2.13284e+06
Gamma-Glutamyltyrosine	41289.6	202959	391635	127562	143434	65594.7	814785	68025.9	3.22415e+06	6.9387e+06	4.33981e+06	1.06338e+07	50348.6	2.03774e+06	525626	433002
PC(O-16:0/1:0)	2.08033e+06	3.93237e+06	5.66177e+06	3.81318e+06	5.81611e+06	5.71319e+06	5.9929e+06	3.55865e+06	5.24959e+06	4.91163e+06	7.95129e+06	7.78418e+06	88873	1.72076e+06	554622	1.53278e+06
N-(1-Deoxy-1-fructosyl)phenylalanine	2.50168e+06	3.21054e+06	6.2109e+06	1.98166e+06	2.87624e+06	2.35254e+06	6.5594e+06	1.81033e+06	3.69544e+06	1.58847e+06	8.42444e+06	5.14091e+06	117398	198050	483615	127513
1-O-(3R,4-dihydroxy-2-methylene-butanoyl)-beta-D-glucopyranose	566636	945116	1.06569e+06	164017	2.77694e+06	2.58284e+06	3.74835e+06	1.05768e+06	2.65074e+06	3.33288e+06	3.73079e+06	4.07262e+06	1.50565e+06	1.87994e+06	2.25715e+06	1.36059e+06
Kuwanon A	5.59606e+06	2.01703e+06	3.49996e+06	5.82558e+06	3.7588e+06	3.17541e+06	3.09473e+06	5.14123e+06	1.41546e+06	556453	1.20452e+06	1.20566e+06	1.05955e+06	680776	535965	681299
3-(2-hydroxyphenyl)oxirane-2-carbaldehyde	136812	2.15157e+06	2.30807e+06	1.0183e+06	79209.9	193833	992537	547351	2.21717e+06	1.31929e+06	3.71994e+06	6.10315e+06	78409.3	472075	206760	737429
Fucosyllactose	577652	986142	1.76673e+06	138363	2.40944e+06	1.3572e+06	3.8841e+06	497118	5.9311e+06	3.57181e+06	1.26079e+07	9.06838e+06	2.15156e+06	2.01037e+06	2.41826e+06	2.1764e+06
Ethyl propyl disulfide	609179	890445	836709	556974	1.9886e+06	2.16013e+06	2.16e+06	1.52097e+06	1.73028e+06	1.39335e+06	1.48877e+06	1.63178e+06	287579	365481	524101	749026
PE(0:0/16:1(9Z))	607955	1.73222e+06	626067	426022	722847	763888	382901	476838	4.11291e+06	4.52946e+06	4.70516e+06	5.37548e+06	153707	1.15199e+06	269153	1.5374e+06
N-[4'-hydroxy-(E)-cinnamoyl]-L-aspartic acid	92647.3	7457.89	18135.2	13422.3	170799	65181	523468	49144.2	2.53607e+06	5.62954e+06	4.10852e+06	8.04344e+06	18825.1	954994	226242	190047
PS(16:0/22:6(4Z,7Z,10Z,13Z,16Z,19Z))	1.15044e+06	480745	1.27755e+06	1.32892e+06	78358	173519	52990.3	170368	228760	259032	620604	98025.3	8167.66	181941	12516.8	10697.5
Hesperetin	1.27591e+06	2.45732e+06	2.02369e+06	2.70151e+06	1.44709e+06	3.00764e+06	3.90538e+06	4.28636e+06	484965	1.08972e+06	1.84216e+06	4.43566e+06	128071	215283	210948	281321
LysoPE(16:1(9Z)/0:0)	602828	2.0941e+06	707373	747764	952688	982041	722321	722538	3.61156e+06	4.54866e+06	4.11644e+06	4.62581e+06	51007.4	470575	138581	449927
Uric acid	216792	299447	249830	469110	173969	297403	876868	425410	1.39064e+06	2.06869e+06	2.42233e+06	2.599e+06	2.43457e+06	3.87031e+06	3.40922e+06	2.53979e+06
PE(16:0/0:0)	351156	741062	1.00736e+06	278229	3.34306e+06	1.3224e+06	1.84805e+06	1.02108e+06	1.69714e+06	1.18879e+06	638106	2.30434e+06	5258.24	68811	9161.23	113912
2-Heptanethiol	4.26117e+06	4.41638e+06	4.70266e+06	4.00629e+06	3.84016e+06	4.46736e+06	5.1578e+06	4.18555e+06	4.30517e+06	3.45868e+06	5.42163e+06	5.2807e+06	1.30763e+06	2.10521e+06	1.56062e+06	1.30253e+06
Harderoporphyrinogen	1.20691e+06	1.35483e+06	1.19039e+06	884087	986638	1.30002e+06	1.10511e+06	794650	3.19826e+06	5.01973e+06	4.42798e+06	3.39873e+06	73355.6	734601	188199	420669
MG(18:1(9Z)/0:0/0:0)[rac]	713598	628585	664384	354832	1.52731e+06	809163	799273	287042	3.94046e+06	4.76833e+06	4.62433e+06	6.12619e+06	198883	3.37612e+06	551508	3.11599e+06
Mytilitol	2.41153e+06	2.97484e+06	3.04527e+06	4.34617e+06	1.85019e+06	2.62006e+06	3.20399e+06	5.27312e+06	713938	888313	1.70354e+06	2.69905e+06	828350	646169	524636	722105
Glipizide	1.09893e+06	1.0317e+06	1.26175e+06	1.70895e+06	1.07251e+06	1.43665e+06	2.6661e+06	3.17036e+06	220666	384617	836595	1.73086e+06	88118.8	80214.8	115768	151093
PI(18:2(9Z,12Z)/0:0)	964108	1.05992e+06	1.2194e+06	778425	957457	1.28051e+06	1.39834e+06	870119	3.4423e+06	5.54854e+06	4.39834e+06	3.75253e+06	73228.9	835460	203191	550691
SM(d18:2/16:0)	135570	126964	1.09447e+06	145720	465346	1.23018e+06	2.54991e+06	926846	565141	7836.69	523347	5.59133e-10	47724.5	44451.6	493857	30638.6
Succinyladenosine	689812	1.75792e+06	1.66345e+06	1.06997e+06	285869	575765	458507	161245	176570	89133.7	143361	47067	392947	88280.6	235020	542743
Tuliposide B	293618	641696	460778	85294.8	1.35112e+06	1.88409e+06	2.13107e+06	476546	1.11062e+06	1.5637e+06	1.81205e+06	1.33788e+06	680149	1.25353e+06	963208	433178
N-Methyl-a-aminoisobutyric acid	4.287e+06	5.03186e+06	4.97875e+06	3.82276e+06	4.36737e+06	5.39019e+06	5.71084e+06	4.2145e+06	4.89502e+06	5.26688e+06	7.29762e+06	7.10146e+06	1.75751e+06	2.60575e+06	2.63668e+06	1.98412e+06
LysoPE(18:3(6Z,9Z,12Z)/0:0)	281168	248037	313977	86079.1	326352	433616	242054	221935	2.69719e+06	3.77096e+06	3.54525e+06	4.33917e+06	121429	1.24991e+06	215685	1.19001e+06
Indole-3-carboxylic acid	173282	71015.2	24766.1	115873	97473.3	65355.7	57454.2	124997	1.1343e+06	423793	455262	1.04165e+06	1.69063e+06	2.45199e+06	2.05849e+06	3.15048e+06
PE(18:0/0:0)	567033	784321	802672	405936	2.94411e+06	1.35951e+06	1.28591e+06	958618	1.21265e+06	1.04855e+06	511305	1.68321e+06	3158.69	66459.6	5972.2	109788
D-Glutamine	3.90704e+06	5.12691e+06	5.98301e+06	5.02875e+06	4.81964e+06	6.17395e+06	6.97494e+06	5.20044e+06	5.75111e+06	8.87718e+06	9.63947e+06	1.2054e+07	3.17239e+06	4.92004e+06	4.4083e+06	3.93838e+06
PC(18:3(6Z,9Z,12Z)/0:0)	232432	224768	448617	131531	608794	808910	758245	447081	3.12077e+06	3.51816e+06	3.83942e+06	5.892e+06	40148.7	423182	132011	338197
LysoPE(0:0/16:1(9Z))	546652	1.64541e+06	490266	595565	620484	650707	386242	505831	2.45221e+06	2.99544e+06	2.73321e+06	3.00456e+06	30282.5	263560	82691.1	252309
Inosine	680348	500681	996881	24467.2	2.45916e+06	1.64359e+06	2.91875e+06	32430.9	4.80465e+06	3.9761e+06	3.23656e+06	1.03162e+06	1.55751e+06	1.15173e+06	2.7254e+06	577184
3-Fucosyllactose	88764.6	162517	345138	12157.8	571211	277113	1.13835e+06	93142.3	2.88918e+06	1.94625e+06	5.47876e+06	5.79087e+06	1.26501e+06	909424	1.6633e+06	766640
Galactose-beta-1,4-xylose	1.88021e+06	1.85367e+06	2.03979e+06	3.13867e+06	1.58388e+06	1.68292e+06	2.19495e+06	3.68118e+06	388322	389254	1.03068e+06	1.41227e+06	173386	205898	273496	338954
Caffeoyl aspartic acid	24564.7	4670.62	7053.31	5.59133e-10	115979	26203.7	295703	12924.4	1.54326e+06	3.87996e+06	2.87514e+06	6.37929e+06	7072.31	737570	138691	97902.4
RPR112698	844648	563970	458673	1.48065e+06	57924.6	115562	5.59133e-10	107412	23183.9	109115	147960	2292.49	5.59133e-10	30335	5.59133e-10	11529.5
2-Amino-5-oxohexanoate	844843	1.33772e+06	1.06526e+06	1.31894e+06	1.13185e+06	1.74738e+06	1.55357e+06	1.86024e+06	1.74186e+06	2.37007e+06	2.39233e+06	3.26916e+06	2.18436e+06	2.83173e+06	3.23964e+06	5.21204e+06
PC(O-18:1(9Z)/2:0)	78272.3	137278	126592	52923.9	205738	229735	170059	183631	2.40025e+06	3.79564e+06	2.32554e+06	2.28441e+06	4303.62	289207	58722.3	386251
(2S)-2-Butanol O-[b-D-Apiofuranosyl-(1->6)-b-D-glucopyranoside]	405718	635648	554318	109768	1.3902e+06	1.71813e+06	1.94839e+06	641202	1.17926e+06	1.49123e+06	1.99928e+06	1.67634e+06	558057	946552	762206	341914
PGF2alpha methyl ether	500486	531444	656648	303035	556151	715146	661252	454006	2.61752e+06	4.03619e+06	3.71085e+06	3.15658e+06	332397	1.68863e+06	510366	1.59352e+06
PC(18:3(9Z,12Z,15Z)/0:0)	155708	112745	242271	37554.4	265710	368509	255799	177544	2.55926e+06	2.5061e+06	3.13878e+06	4.68388e+06	106106	792298	185298	779616
Beta-D-Glucose	3.40567e+06	3.06951e+06	4.03697e+06	3.00371e+06	3.64922e+06	3.15268e+06	4.99665e+06	2.46413e+06	4.4999e+06	3.36454e+06	6.84591e+06	6.7431e+06	1.60416e+06	2.0685e+06	2.49514e+06	1.94503e+06
17-HOME(9Z)	334309	803518	1.40028e+06	128080	267114	184182	161203	147246	1.63659e+06	1.52271e+06	1.85379e+06	1.35866e+06	82153.9	401012	185774	104684
Armillaripin	998990	1.17794e+06	1.43318e+06	1.81444e+06	2.61734e+06	1.84904e+06	3.83589e+06	2.02522e+06	2.48708e+06	2.19345e+06	4.29134e+06	4.27049e+06	1.31155e+06	1.48116e+06	1.19361e+06	1.0637e+06
1-(2-methoxy-6Z-octadecenyl)-sn-glycero-3-phosphoserine	455410	983151	655691	522270	919725	941422	626198	654330	2.67863e+06	2.67802e+06	3.43158e+06	4.42521e+06	36600.1	240405	92289.7	259717
Austroinulin	2031.64	5814.98	2531.63	216.014	659.709	5766.49	4727.04	2113.21	424982	222468	366748	46540.5	1.35334e+06	4.71039e+06	1.93198e+06	560256
PC(0:0/18:0)	597078	729620	580955	421406	2.32305e+06	1.20571e+06	1.01389e+06	647079	981677	784772	332427	963368	898.444	42969.7	3478.92	42311
Benzofuran	116415	1.26705e+06	1.14743e+06	496772	87558.4	130112	490091	251315	1.02102e+06	693754	1.74597e+06	2.77512e+06	62228.6	264870	124920	317490
Oleamide	951210	2.92896e+06	2.13519e+06	992376	4.31347e+06	3.36198e+06	2.21165e+06	1.68769e+06	4.0142e+06	4.49435e+06	3.78603e+06	6.19719e+06	184793	1.8588e+06	432977	2.18364e+06
Prupaside	680755	393160	406790	851169	3341.31	22326.3	978.308	31258.8	9892.54	19289.5	25321.9	58.6894	45.5881	1350.43	797.523	1339.11
LysoPE(18:3(9Z,12Z,15Z)/0:0)	275174	282112	363005	177064	408925	587012	431002	352505	2.11269e+06	3.21507e+06	2.76325e+06	3.49081e+06	49813.6	500364	118169	362473
(4-{3-[2,4-dihydroxy-5-(3-methylbut-2-en-1-yl)phenyl]-2-hydroxy-3-oxopropyl}-2-(3-methylbut-2-en-1-yl)phenyl)oxidanesulfonic acid	17451.8	1.06972e+06	946934	47385	22007.5	174025	1.10077e+06	143496	2.09539e+06	1.11675e+06	2.79089e+06	4.48536e+06	49529.2	581102	150221	490576
OKOHA-PI	644859	586100	412547	906508	67485.4	140075	33313.1	154106	54606.7	89121.7	122070	20132	5.59133e-10	19831.5	2746.19	5.59133e-10
Cysteinyl-Aspartate	1.11608e+06	1.47735e+06	1.39354e+06	935676	1.38298e+06	2.15492e+06	2.44005e+06	965238	3.04083e+06	3.03782e+06	4.46309e+06	6.05732e+06	520282	1.10335e+06	889910	566923
Droperidol	473994	486457	509567	747966	727218	671144	1.23691e+06	1.91383e+06	157286	241265	479491	1.33031e+06	37584.4	19302.1	40408.4	74545.9
2,5-Dimethyl-1,4-dithiane-2,5-diol	131062	1.0066e+06	319118	320816	56400.4	585251	362966	93651.1	2.4094e+06	1.78483e+06	1.88205e+06	986495	1.55235e+06	2.74092e+06	2.07459e+06	732998
4-Methylbenzyl alcohol	2.76877e+06	2.59778e+06	3.24441e+06	2.78958e+06	3.3516e+06	3.34453e+06	5.07568e+06	3.70935e+06	4.18575e+06	4.63206e+06	5.492e+06	7.49344e+06	1.90303e+06	2.57481e+06	2.74425e+06	2.29145e+06
(4E,6E,d14:2) sphingosine	767621	908363	1.60054e+06	1.31156e+06	2.38243e+06	1.62821e+06	1.9976e+06	1.39294e+06	1.25491e+06	1.63944e+06	1.69856e+06	2.28425e+06	73717.8	623491	121070	589215
PC(O-14:0/2:0)	280498	548801	501223	201548	695373	745674	436555	237155	2.39091e+06	2.57649e+06	3.06865e+06	3.31214e+06	33145.1	751140	92038	780495
PHENOLPHTHALEIN	445242	1.21028e+06	577252	103009	1.45615e+06	2.15388e+06	1.94225e+06	691061	1.54203e+06	2.22042e+06	2.17044e+06	2.82262e+06	200502	482731	344624	180934
5'-Methylthioadenosine	860337	391933	395734	779166	64924.8	89235.1	144348	167585	196552	63975	280677	503784	519.457	3024.82	860.455	3237.68
Japanic acid	507672	1.0285e+06	605807	502962	949290	898454	740456	529906	2.66579e+06	3.3256e+06	3.1946e+06	2.99101e+06	71736.3	1.46657e+06	262438	1.45472e+06
Glycobismine A	27251.6	145403	266439	5.59133e-10	382019	236873	830398	65934	1.69248e+06	1.38002e+06	3.4659e+06	4.55689e+06	985166	921363	1.08697e+06	836365
N-(1-Deoxy-1-fructosyl)leucine	987908	1.21037e+06	2.37151e+06	838154	1.16142e+06	882635	2.26775e+06	622311	1.47348e+06	637032	3.78617e+06	2.44281e+06	43261.4	48422.9	173834	40457.1
N-(3-carboxypropanoyl)-N-hydroxyputrescine	503749	472122	625103	560566	1.28277e+06	1.10613e+06	1.48023e+06	922742	1.27614e+06	1.09086e+06	1.18364e+06	1.85165e+06	1.09576e+06	925923	1.03631e+06	1.25889e+06
Triamcinolone acetonide glucuronide	700154	274773	542217	883068	72521.3	114819	29099	156149	52502.2	112207	279099	38825.5	13552.6	19743	30589.6	26772.1
AL 8810 methyl ester	517918	365668	416599	637270	11459.7	41097.9	15181.1	41806.5	29990.9	44621.3	124128	15115.4	5.59133e-10	7096.16	5.59133e-10	1252.2
PC(O-18:2(9Z,12Z)/2:0)	97180.2	178850	212084	87943.1	240706	331248	256735	183717	2.05057e+06	2.15631e+06	2.29008e+06	2.06971e+06	287.637	98018.5	18651.8	96284.8
Cinnamoside	462181	431579	409103	456607	7685	3361.62	4781.79	3557.94	5.59133e-10	7077.36	21392.1	11.2348	5.59133e-10	5.59133e-10	5.59133e-10	2454.79
D-Pipecolic acid	1.85601e+06	1.91854e+06	2.49144e+06	1.47023e+06	1.51508e+06	1.88987e+06	2.33447e+06	1.60366e+06	1.99521e+06	1.6646e+06	2.50245e+06	2.13019e+06	427194	806354	559243	368684
PGA1	4655.68	12068	7390.43	1384.7	3494.47	10826.6	4695.15	1658.67	301887	435019	197877	52058.5	1.27094e+06	3.75371e+06	1.60384e+06	315818
Antimycin A1	467603	293642	276815	179810	260222	340059	254346	266898	1.71268e+06	2.41985e+06	2.31718e+06	2.13131e+06	339462	1.38392e+06	452728	1.1864e+06
Acetyl citrate	128960	140259	148865	80122.6	1.08504e+06	591115	1.83463e+06	411940	631064	869797	2.01047e+06	1.81745e+06	19235.9	59417.4	421758	56423.3
FAPy-adenine	2.99784e+06	2.31271e+06	3.32168e+06	2.58906e+06	2.11317e+06	2.70141e+06	3.90638e+06	2.84781e+06	2.55965e+06	2.67144e+06	4.19705e+06	6.30018e+06	1.21621e+06	1.96877e+06	1.58642e+06	1.34633e+06
Pantothenic Acid	1.96691e+06	1.9572e+06	2.51938e+06	1.84136e+06	2.66279e+06	2.89512e+06	3.97631e+06	2.8299e+06	3.52354e+06	3.25274e+06	4.28261e+06	5.0583e+06	1.5826e+06	2.17388e+06	1.6872e+06	4.66111e+06
9-tridecynoic acid	2.2403e+06	2.23608e+06	2.7239e+06	2.5726e+06	3.00023e+06	3.14305e+06	4.06764e+06	2.89834e+06	3.49082e+06	3.54549e+06	4.76844e+06	5.58108e+06	1.68331e+06	2.15417e+06	2.1994e+06	1.83134e+06
N-(3-hydroxy-pentanoyl)-homoserine lactone	38621.3	74349	53794.9	36126.4	33974.5	72268.3	76696.7	39289.4	885486	514296	859099	589588	1.16458e+06	1.36667e+06	1.54475e+06	1.17276e+06
5-(3',4',5'-Trihydroxyphenyl)-gamma-valerolactone-3'-O-glucuronide	1.42237e+06	1.03942e+06	1.02069e+06	1.1151e+06	1.21457e+06	1.36184e+06	1.13994e+06	1.28634e+06	580770	545173	346137	136782	85851.2	26760.2	86967.5	25703.3
Hygromycin A	387175	565403	972250	151224	371584	638079	1.23144e+06	174962	1.90725e+06	1.29873e+06	5.40517e+06	2.54281e+06	989229	972734	2.39119e+06	959060
3-Hydroxynevirapine glucuronide	508380	531559	614107	86292.8	884729	1.13913e+06	1.00011e+06	496650	629802	59909.7	326791	239061	32310.7	119883	28129.4	34792.2
PC(P-15:0/0:0)	806182	1.71477e+06	1.8548e+06	1.08507e+06	1.52839e+06	1.21943e+06	1.09242e+06	605084	3.37329e+06	3.48034e+06	2.61959e+06	3.31221e+06	155360	3.99393e+06	681902	2.08432e+06
2-Aminoheptanedioic acid	18206.7	603824	762317	451686	17255.2	11442.5	28581.9	13998.8	108875	137976	222042	131687	67489.8	86345	112861	213222
2,3-Butanediol apiosylglucoside	381861	803661	507532	121761	1.15768e+06	1.60671e+06	1.50994e+06	463946	1.03604e+06	1.20891e+06	1.66487e+06	1.41267e+06	303504	694229	474069	195822
6-O-(3R,4-dihydroxy-2-methylene-butanoyl)-beta-D-glucopyranose	142563	206633	304085	157422	758881	683647	1.2446e+06	500781	675107	660961	960362	1.25969e+06	477072	635978	688132	406033
S-Acetyldihydrolipoamide-E	1.17645e+06	1.4823e+06	1.93082e+06	138738	1.46931e+06	2.01275e+06	2.73913e+06	274288	2.3131e+06	1.70933e+06	3.95749e+06	2.98071e+06	244342	551973	365090	218086
Phenethylamine glucuronide	1.11151e+06	1.15112e+06	1.65196e+06	1.32115e+06	1.04802e+06	1.15566e+06	1.14314e+06	1.51333e+06	314181	168743	494709	1.30338e+06	7034.82	8871.55	32014.9	6820.9
PE(O-18:0/0:0)	412512	1.0652e+06	927275	595288	2.29445e+06	1.65699e+06	1.64727e+06	681786	2.10065e+06	1.98922e+06	1.26491e+06	2.02297e+06	46189	1.29667e+06	190106	881011
Phloroacetophenone 6'-[xylosyl-(1->6)-glucoside]	50181.8	1.31283e+06	576615	88433.4	123889	248320	1.07895e+06	286263	2.72201e+06	2.20249e+06	1.14176e+06	2.76989e+06	86046.3	781348	242446	137197
MG(18:2(9Z,12Z)/0:0/0:0)[rac]	161335	228365	290159	97713.9	329166	372793	294340	200443	1.72244e+06	2.4527e+06	2.10403e+06	2.2876e+06	56016.9	847964	165503	833698
Ibervirin	1.54858e+06	862288	1.17521e+06	1.13594e+06	1.72038e+06	1.18411e+06	881203	1.32608e+06	511844	351496	485616	260017	94026.1	53714.6	116724	99521.4
PC(16:0/0:0)[rac]	368537	636325	745083	344279	1.91649e+06	1.18662e+06	1.09981e+06	636888	1.39282e+06	1.1821e+06	1.23063e+06	1.8645e+06	4904.1	146980	18410.3	91166.3
Uridine diphosphate-N-acetylglucosamine	170654	626838	273894	831510	32277.7	51020.4	63919.5	27895	88528.6	381130	135611	93949.1	21763.8	19985.3	9436.7	3889.76
Hydroxypropionylcarnitine	1.17651e+06	1.19924e+06	1.65998e+06	1.44799e+06	1.91987e+06	1.05343e+06	2.36742e+06	1.04774e+06	1.74517e+06	488431	1.72948e+06	1.7778e+06	133295	106623	313089	74500.6
Isoleucyl-Lysine	1.09428e+06	621540	257261	641534	134141	115235	36708.5	210878	112423	63667.3	47604.3	16641.4	67904.5	169943	97982.4	431508
2-Isopropylmalic acid	14555.8	12952.1	17955.6	16043.4	7899.49	9839.45	14627	11658.2	530112	784435	293926	546141	891152	1.28027e+06	1.32219e+06	1.29004e+06
Deoxynivalenol 3-glucoside	547286	425425	104847	749572	2091.31	14066.4	820.21	18344.5	5.59133e-10	1845.76	5.59133e-10	5.59133e-10	5.59133e-10	5.59133e-10	5.59133e-10	5.59133e-10
PE(18:3(6Z,9Z,12Z)/0:0)	255118	237109	257657	146837	270037	426893	238467	235709	1.45837e+06	2.12864e+06	1.98639e+06	2.30376e+06	24306.3	291288	66890	183774
Melanostatin	13524.4	56158.6	10457.6	13211.8	12981.9	50480.9	6872.01	12051.8	837738	1.52242e+06	344756	153357	1.66104e+06	2.44372e+06	982230	478325
Xanthine	976529	856042	1.25049e+06	1.07406e+06	1.18919e+06	1.31763e+06	1.40115e+06	1.52549e+06	666649	761136	1.07567e+06	1.60286e+06	95846.1	82285.2	188294	82586
Palmityl-CoA	2.91901e+06	625470	1.57241e+06	1.58998e+06	1.93212e+06	834999	1.37351e+06	1.31944e+06	1.05887e+06	200814	338571	296494	534914	178568	256505	119449
N-Acetyl-D-mannosaminolactone	173755	62427.3	68349.5	18429.8	423530	248740	599573	99232.9	1.5332e+06	2.10289e+06	1.94868e+06	3.35234e+06	75767.6	320978	144421	164995
3-phenyloxirane-2-carboxylic acid	28789.1	41331.9	60322.1	45926.2	37993.7	40733.1	85554.3	50220.9	109343	329220	307779	231522	265279	789596	1.61371e+06	3.21683e+06
Trehalose	550564	692168	1.61756e+06	482156	844943	423778	1.51697e+06	387359	2.02081e+06	1.03012e+06	4.24991e+06	2.71816e+06	667660	677073	1.44688e+06	1.29796e+06
PI(20:3(8Z,11Z,14Z)/0:0)	107201	171689	415850	47494.8	229330	227650	427340	70420.7	1.50654e+06	1.15386e+06	2.81853e+06	2.22843e+06	15646.7	146850	74728.5	103223
12,20-DiHETE	6484.14	7101.73	10496.8	287.26	4160.18	5756.98	4451.16	322.847	180921	329533	868998	27651.9	1.86462e+06	2.16782e+06	936797	230549
5,3'-Dihydroxy-6,7,4',5'-tetramethoxyflavanone	425753	753532	578363	119544	1.21083e+06	1.50587e+06	1.48419e+06	433894	1.1541e+06	1.43942e+06	1.94471e+06	1.48271e+06	413204	788971	599845	276012
2-hydroxyflutamide	801641	538243	1.11221e+06	1.88208e+06	422083	2.06411e+06	667032	1.47335e+06	174015	79697	148494	371733	36902.6	42528.8	7234.41	161071
4-[[5-(acetylamino)-1-(hydroxymethyl)-1H-indol-3-yl]methyl]-3-methoxy-N-[(2-methylphenyl)sulfonyl]-B	48166.1	324612	156126	27682.8	270524	814856	703218	241588	128313	139098	139597	194251	78594	105748	99975.7	89586.4
L-Dihydroorotic acid	374357	273084	130242	426552	77839	70682.5	177134	406619	1.30313e+06	973964	1.59267e+06	1.92299e+06	681443	880295	766893	736985
Sagittariol	262429	766780	2.21009e+06	208341	569608	755730	882614	282357	1.00658e+06	1.17841e+06	1.54328e+06	1.40383e+06	22909.6	169266	62637.3	36252.9
9-deoxy-9-methylene-16,16-dimethyl -PGE2	368878	286910	328777	380348	13288.3	33576.9	20658.7	34319.1	31788.9	53919.4	159838	19642	1611.37	13935.1	3055.83	5332.83
a-L-Fucopyranosyl-(1->2)-b-D-galactopyranosyl-(1->2)-D-xylose	71472.7	330796	133158	35852.6	340097	824281	678470	225791	182127	206325	215603	251250	114583	141114	109290	91862.5
PC(14:1(9Z)/0:0)	69472.2	63681.1	57712.6	52509	74722.7	73797.9	50197.6	96291.3	1.75686e+06	1.27492e+06	1.15046e+06	1.46255e+06	79999	367088	136881	394430
D-(+)-Melezitose	834648	565609	1.04607e+06	2.46661e+06	399473	1.75298e+06	631487	1.62482e+06	100324	46208.2	146635	470983	60866.9	60520.2	3172.57	256789
Clerodendrin A	487599	458411	221977	558669	72473.7	80504.2	21377	115551	13603.5	38717.5	52434.3	11788.3	5.59133e-10	2242.01	391.692	378.365
1-(2-methoxy-6Z-pentadecenyl)-sn-glycero-3-phosphoethanolamine	181514	361807	402924	144404	1.29342e+06	535669	673056	468543	597979	444135	234797	924395	1115.27	24835.5	2946.84	36011.8
Niacin (Nicotinic acid)	964784	953770	1.37573e+06	1.04668e+06	1.37707e+06	1.63334e+06	2.36769e+06	1.55685e+06	2.41326e+06	2.39773e+06	3.23958e+06	3.90518e+06	1.1747e+06	1.50032e+06	1.42921e+06	1.06693e+06
PG(18:4(6Z,9Z,12Z,15Z)/0:0)	827371	525368	663197	389471	227737	268605	327044	321315	351441	502575	612905	403495	64630.4	371837	163908	289575
PC(18:3(6Z,9Z,12Z)/0:0)[U]	154346	129203	213447	75019.1	255651	378046	284637	205899	1.3192e+06	1.54084e+06	1.74253e+06	2.43664e+06	16796.7	169248	50834	117658
(S)-2,3-Dihydro-3,5-dihydroxy-2-oxo-3-indoleacetic acid 5-[glucosyl-(1->4)-b-D-glucoside]	5.59133e-10	1344.68	1801.1	5.59133e-10	1820.48	420.746	5.59133e-10	5.59133e-10	281366	499130	154256	737590	1.10418e+06	231778	986904	2.36321e+06
Acetyl-D-carnitine	1.28608e+06	1.29708e+06	1.11224e+06	525693	859261	1.06297e+06	1.10201e+06	616973	1.06668e+06	717110	1.45028e+06	1.3605e+06	113586	257080	175530	112798
AMINOHYDROXYBUTYRIC ACID	1.19483e+06	1.2367e+06	1.43128e+06	1.3626e+06	1.3572e+06	1.39014e+06	1.5412e+06	1.44091e+06	1.21731e+06	1.01144e+06	1.48257e+06	1.53958e+06	331853	459146	453550	395594
4-(2-Amino-3-hydroxyphenyl)-2,4-dioxobutanoic acid	131.448	10862.4	5415.89	3435.11	6488.19	6930.97	4227.6	3523.58	80235.5	184603	23525.7	477724	561231	392211	1.04686e+06	2.79555e+06
Glutamylvaline	1.07078e+06	1.32731e+06	1.25424e+06	1.30628e+06	898198	997567	1.24098e+06	783555	1.18586e+06	1.2705e+06	2.37832e+06	2.01338e+06	570954	1.17183e+06	959288	776071
Erythro-5-hydroxy-L-lysinium(1+)	150739	46573.7	85919.4	21454	430092	176636	649632	103336	1.29757e+06	2.11125e+06	1.51225e+06	2.54577e+06	44046.5	421951	222494	211396
Itaconic acid	750405	729545	986165	737177	1.35419e+06	1.0434e+06	1.44266e+06	989256	2.2222e+06	1.85161e+06	2.62256e+06	3.30627e+06	430399	510731	763420	495255
1-Cyclopropyl-4-methyl-1,3-cyclohexanediol	16032.1	13235.5	19408.4	17438.6	14630.9	15926.3	19222.2	23091.3	778641	342019	202108	452756	884517	548506	942877	1.58897e+06
19-Hydroxy-8-O-methyltetrangulol	138305	307348	533672	64710.6	247205	262315	657928	104124	1.16196e+06	877090	2.83489e+06	2.27366e+06	190972	281257	445600	245543
Tetrangulol	330898	752546	594617	793983	388025	889173	1.2277e+06	1.30254e+06	124373	308823	469032	1.32709e+06	26719.3	41832.4	47635.9	67495.3
1,2-Dioctadecanoyl-3-(galactosyl-B-1-6-galactosyl-B-1)-glycerol	5.59133e-10	12970.4	5.59133e-10	5.59133e-10	4241.27	8324.59	5.59133e-10	1060.68	1.3336e+06	1.00435e+06	1.08605e+06	1.61677e+06	5.59133e-10	77993.2	1609.28	272747
3-(4'-Methylthio)butylmalic acid	639631	490102	252178	917535	1.04717e+06	1.11303e+06	388724	859011	225072	257865	328150	254059	440627	491085	403207	289669
Succinylproline	42389.4	58914.6	45203.2	64812.1	177396	109936	168036	99096.6	553612	1.05035e+06	546682	559164	843637	1.1683e+06	705721	1.14136e+06
2-O-ethyl PAF C-16	467816	1.1844e+06	660058	586410	694719	495319	259341	220039	867990	735910	331770	432115	6153.91	251437	25600.1	148963
4,5-DIDEMETHYLSIMMONDSIN	579319	717359	1.23973e+06	431722	485732	400056	960720	291932	607629	210806	1.49678e+06	833734	15814	17520.5	65476.3	16560.5
C16 Sphinganine	368459	549533	783944	494987	1.56139e+06	755038	1.33038e+06	619211	1.6395e+06	1.26897e+06	3.54488e+06	2.88548e+06	224746	1.12419e+06	268709	516217
5-[(3-methoxyphenyl)methyl]oxolan-2-one	5626.74	3696.48	7759.59	4962.77	7665.8	2093.3	5423.5	3739.97	247910	72385	46579.2	320735	1.25776e+06	184799	739431	2.20131e+06
Uridine 5'-monophosphate	346688	705086	521619	163867	63333.3	137256	107637	139678	70757.2	96839.5	65333.4	59288.8	10395.9	32726.3	12338.7	11002.8
B-Trisaccharide	107127	164714	267861	55934.9	615586	293689	683190	172703	1.76485e+06	983628	2.66342e+06	2.2369e+06	525232	404920	980024	517238
2-hydroxy-10-undecenoic acid	3095.69	6034.85	7927.47	3077.17	1887.48	4083.6	5147.15	2826.08	415240	459911	278415	310440	900814	784736	716851	899891
Delavirdine	38663.7	13753.3	5.59133e-10	92114.8	10149.6	57573.8	186260	117457	289779	447568	483227	592969	669731	1.18032e+06	1.05143e+06	686091
6-(carboxymethoxy)-3,4,5-trihydroxyoxane-2-carboxylic acid	83706.4	92258.9	91716.5	44524.7	677663	382065	1.1564e+06	244783	378991	543979	1.2692e+06	1.18134e+06	10141.8	42151.7	269774	38213.8
PIM1(17:0/18:0)	27772.7	35455.4	93891.8	4165.69	65534.1	131474	61985.4	39714.5	860296	1.31446e+06	1.67073e+06	1.56873e+06	5784.48	355517	35067.9	372668
Glutamyltyrosine	9289.33	78492.7	136482	50126.6	22965.3	13024.9	154859	20198.4	680372	1.47856e+06	1.00577e+06	2.46834e+06	5378.25	291063	83032.9	71483.8
Isopropyl apiosylglucoside	163560	253915	309382	65810	722183	702038	873157	310619	659033	949147	911006	1.09397e+06	432409	531550	644637	412803
Sambubiose	1.13426e+06	281878	791719	749918	1.32264e+06	628410	904522	675285	404970	68338.4	137032	15041.9	374099	62231.5	68682.7	16766.5
PC(20:3(8Z,11Z,14Z)/0:0)	43796.1	94127.1	241147	134221	104927	136107	171071	101983	834437	775872	1.94227e+06	1.96579e+06	662.296	82699.1	21300.7	230229
1,2-octadienoylglycine	63552.2	155847	36737.8	75848.9	41896.9	162714	52160.9	97180.3	718808	360673	382189	467376	714257	757870	662893	1.77224e+06
PG(22:6(4Z,7Z,10Z,13Z,16Z,19Z)/0:0)	372966	257870	199927	519483	36842.1	74761.9	15948.8	80095.5	17820	51018.3	119653	13737.7	736.784	9309.67	621.413	5999.55
(S)-2-Propylpiperidine	1.11631e+06	740430	563614	1.31699e+06	1.05146e+06	788582	814517	1.19917e+06	1.27288e+06	1.41892e+06	1.0889e+06	1.01868e+06	1.54073e+06	1.56125e+06	2.29345e+06	1.87028e+06
4-Hydroxycyclohexylcarboxylic acid	29591.9	47265	45523.4	67214.9	13968.9	33195.9	19779.5	56929.2	517202	484884	525116	415869	797294	794283	908380	651988
Tyrosyl-Aspartate	31832.1	14551	22688.9	3193.44	44336.2	15749.8	112292	6320.1	584277	1.38461e+06	1.19796e+06	2.25862e+06	4584.85	176699	38130.5	32019.5
Zopiclone	1.0006e+06	1.06893e+06	1.44284e+06	1.20463e+06	1.68588e+06	1.6479e+06	2.06546e+06	1.53605e+06	1.82559e+06	2.09127e+06	2.66341e+06	3.11026e+06	868294	1.24564e+06	1.30563e+06	959939
2-Deoxystreptamine phospahte	291521	248020	303005	298969	704847	647223	884172	514586	733611	495425	639203	1.04326e+06	329802	377793	295326	364825
Cerebroside B	5.59133e-10	5.59133e-10	4122.91	4502.55	263178	66422.2	672068	124438	5.59133e-10	2974.44	5.59133e-10	13563.6	5.59133e-10	5.59133e-10	17631.8	17257.3
dinor-12-oxo Phytodienoic Acid-d5	9031.99	10414.3	13230.5	4760.89	8873.97	12647.5	15122	3660.94	276013	301012	110556	69964.5	941456	850027	798618	621358
3-Hydroxytetradecanedioic acid	3390.18	4257.9	6430.55	2484.99	2158.45	4113.8	4419.3	2164.16	305775	290575	136247	204372	921725	593775	871892	765271
PS-PC	187659	533239	459444	139483	339954	280666	372248	90590.8	1.10519e+06	742131	1.97944e+06	1.45006e+06	6633.27	109815	41275.9	71572.5
PG-PA	405341	563470	217210	266395	194280	242145	175278	198541	860997	1.1936e+06	942542	875759	149403	480963	173565	439305
N6,N6,N6-Trimethyl-L-lysine	1.01133e+06	892284	1.18833e+06	1.38841e+06	1.4175e+06	1.31513e+06	1.76112e+06	1.62355e+06	1.62384e+06	1.57574e+06	1.95759e+06	2.13716e+06	706665	886707	634355	640223
2,2,4,4,6,6-Hexamethyl-1,3,5-trithiane	1.14948e+06	1.246e+06	1.59336e+06	1.44713e+06	1.66907e+06	1.84274e+06	2.30545e+06	1.69664e+06	1.96854e+06	2.04037e+06	2.88651e+06	3.25664e+06	1.02047e+06	1.24617e+06	1.30417e+06	1.09094e+06
catechin(3',4',5,7-tetraacetate)-3-dodecanoate	348390	278072	176949	453963	28946.9	46398.5	8911.22	71794.8	7903.57	26046.6	33900.7	2086.39	4660.63	1118.15	5.59133e-10	501.188
Gein	256884	429625	318596	257202	174323	318705	947649	584992	550080	839963	816410	1.7242e+06	878896	1.68789e+06	1.2545e+06	868428
Cerulenin	409549	401826	482560	400409	470234	616451	775162	495209	757688	765012	932568	965948	1.08625e+06	1.2626e+06	1.18955e+06	1.046e+06
CAY10603	463497	723549	554817	524112	369938	293216	275194	394216	418656	81186.6	543697	766425	2470.49	2155.9	5.59133e-10	14289.6
PC(16:0/5:0(CHO))	42824	66065.6	93395.1	31273.5	91097.5	127939	85105.7	59810	1.12953e+06	1.02171e+06	1.29285e+06	1.15985e+06	1847.78	103288	21327.8	99498.1
PE(0:0/18:3(6Z,9Z,12Z))	756360	505591	531758	362481	281406	332219	273821	297227	327142	507955	638729	452182	30960.4	263062	91884.9	191403
Dihydrodeoxystreptomycin	248351	359600	204114	357146	23250	35189.4	32259.8	27042.4	7935.65	4569.4	18058.6	1491.91	8866	10274.8	36992.9	53938.5
N-(1-Deoxy-1-fructosyl)glycine	1.04132e+06	1.29111e+06	738268	592151	632005	1.00747e+06	857860	538216	386693	466183	796889	698718	109513	162873	135694	125046
Phosphocreatinine	1.39054e+06	1.47565e+06	1.96992e+06	1.53852e+06	1.36025e+06	1.67927e+06	2.34779e+06	1.53573e+06	2.05747e+06	1.94497e+06	3.16764e+06	3.39083e+06	722338	859240	1.17305e+06	1.48663e+06
Sclareol	235616	600328	1.67468e+06	237222	1.36021e+06	828584	1.22239e+06	292193	1.04782e+06	1.46351e+06	1.42272e+06	1.70951e+06	2440.76	162697	25898.8	42686.9
Lamiide	1.11544e+06	510340	1.01969e+06	1.18697e+06	755514	420591	400351	1.60326e+06	106202	62690.9	117266	45001.4	316860	244257	63705.1	164073
Pseudouridine 5'-phosphate	258247	780633	556745	159396	78033.1	196575	171896	146461	109932	175534	100366	107747	6934.97	47237.7	17930.3	17761.1
5'-Hydroxy-7,4'-dimethoxy-5,2'-oxido-4-phenylcoumarin	5.59133e-10	5.59133e-10	5.59133e-10	5.59133e-10	5.59133e-10	5.59133e-10	5.59133e-10	5.59133e-10	160338	114449	13347	125775	625481	579012	664065	1.19258e+06
13-HOTE	85012.2	116280	61236.2	36600.4	441402	320084	266826	198120	80590.1	135439	135407	195144	52521	81059.5	60734.9	36875.2
PIM1(19:0/16:0)	33150.9	49886.5	105450	14149.5	131805	169472	129664	53490.5	993132	1.29279e+06	996153	1.16981e+06	5.59133e-10	75843.5	3672.18	69114.6
Bentiromide	834775	290627	413690	429760	1.07234e+06	482320	911138	458170	681071	356560	102546	93008	320305	32865.8	112179	17972
Dambonitol	625978	754809	557515	636501	671706	733389	717397	859738	155969	190268	439554	455147	71595.7	93275.2	110390	111344
2-[3-(sulfooxy)phenyl]acetic acid	141660	613347	746001	323329	334875	647515	1.12387e+06	580247	147863	105807	388341	496571	16055.4	40678.7	65486.8	71527.6
D-2,3-Dihydroxypropanoic acid	884078	608276	698590	763777	572492	621598	551288	711571	279327	168429	404891	533690	39281.1	20861.4	25299.5	29624.7
gamma-CEHC Glc	1.05083e+06	1.29661e+06	1.42118e+06	976738	1.10702e+06	1.26836e+06	1.5802e+06	1.00127e+06	1.73219e+06	1.27899e+06	2.73978e+06	2.4448e+06	495172	950150	847863	514525
S-Cysteinosuccinic acid	59962.7	53215.6	84516.6	81011.4	42915.8	102946	133563	43366	237440	176226	154110	241735	695702	1.05947e+06	455921	916009
Isoleucyl-Glutamate	910379	1.05125e+06	1.18027e+06	892959	774964	897775	1.14061e+06	594371	1.26418e+06	1.17934e+06	2.36164e+06	1.67642e+06	605420	1.26428e+06	773972	624676
N-lactoyl-Phenylalanine	860416	831275	677961	313977	460441	577147	543909	355839	527653	228963	673783	554515	31530.4	81065.9	75988.4	41760.4
gamma-Glutamylisoleucine	886748	953466	1.03805e+06	739580	740759	823696	856705	594717	936561	678271	1.51639e+06	1.12522e+06	235729	490025	317196	273900
11-Hydroxy-9-tridecenoic acid	4665.75	7390.78	6203.15	3071.25	3485.17	4543.61	5498.99	1771.05	312365	291364	133417	195199	804493	547107	725597	672779
Thaumatin b, recombinant	539903	422613	528090	814537	726317	656333	757784	1.0926e+06	652983	428056	640275	576483	481675	307509	267486	463144
GalNAca1-3[Fuca1-2]Galb1-4[Fuca1-3]GlcNAcb-Sp	810990	555066	589941	883135	822393	912437	546757	800901	103778	140328	82185.7	90587.9	350057	193056	186814	150427
LysoPC(20:1(11Z))	63122.8	117179	99622.1	51692.1	236115	191748	164309	130387	941272	1.46284e+06	847281	846477	226.979	51016.9	6761.94	46252.5
Porson	1.04722e+06	1.35531e+06	1.39321e+06	1.87865e+06	2.13092e+06	1.76758e+06	1.91352e+06	1.8167e+06	2.75487e+06	1.87139e+06	2.03775e+06	2.71205e+06	1.24967e+06	2.00391e+06	1.0431e+06	866053
6-oxo-Nonan-1-ol	6241.66	4647.6	10789	3418.57	3967.2	3454.19	9351.5	2810.69	552365	101030	270151	308172	1.04458e+06	312864	852221	694708
Butyl 3'-O-butanoyl-4,6,4'-tri-O-(2-methylpropanoyl)-neohesperidoside	64964.3	59389.3	26878.9	82882.1	2218.09	3825.37	3025.94	22164.9	138400	18073.4	526099	17372.4	510383	1.38326e+06	1.49824e+06	69265
6-(alpha-D-Glucosaminyl)-1D-myo-inositol	48604	34124.2	56238.6	54134.9	62308.4	47839.5	72774	52713.7	261954	103334	235993	158947	825794	806492	825136	448669
N-Hexadecanoylpyrrolidine	219623	527531	1.04369e+06	395795	289778	341540	550788	239877	286755	192336	364865	756620	234.719	56104.5	1570.54	17947.7
beta-D-Xylopyranosyl-(1->5)-alpha-L-arabinofuranosyl-(1->3)-L-arabinose	616905	594485	855093	778780	941723	628455	1.31859e+06	1.19169e+06	1.3212e+06	855704	2.40157e+06	2.34664e+06	203112	242024	314753	292792
BUFEXAMAC	6624.56	3421.47	5301.13	5357.16	6009.79	1119.8	2802.36	2123.91	208474	58308.6	36500	276957	907529	144395	571884	1.82617e+06
1,3-Hexadecadien-1-ol	337663	829034	1.01814e+06	525828	1.38532e+06	1.07541e+06	1.09281e+06	690027	1.46839e+06	1.40627e+06	1.61534e+06	2.29942e+06	78842.4	567576	166809	544602
Deltorphin A	399144	74979.2	300920	642667	59488.2	74189.8	7155.01	167670	17709.3	72707.6	87955.3	6416.44	5.59133e-10	4070.01	5.59133e-10	2.96628
Turicine	347535	331073	435466	499906	546668	494949	659651	623235	713628	682611	794131	1.55763e+06	968686	905924	884635	1.91673e+06
Triamcinolone acetonide	2651.31	24901.9	1373.86	229.041	200170	201545	200434	128639	23987.6	14999.9	16715.7	13619.4	11304.9	17105.9	10223.4	17029.3
Harderoporphyrin	311896	170924	167342	314026	7958.14	25688.4	8519	25337.2	15156	9612.62	16945.7	9736.61	0.473913	5.59133e-10	5.59133e-10	5.59133e-10
PHOHA-PE	77107.3	121838	254294	29119.8	116017	125259	196916	40422.8	871061	623638	1.71286e+06	1.28403e+06	6665.21	72343.6	34983.3	47743.4
3-Isopropenylpentanedioic acid	58489.9	66029.2	64036	62867.4	64240.5	71881.7	84869.8	57829.2	779085	938134	519572	518141	729546	472082	455447	513544
Panfuran S	63427.9	176864	219015	522.761	433721	276073	837836	96204.1	1.27553e+06	804601	2.56215e+06	1.61398e+06	207732	154981	303323	181732
Mupirocin	5.59133e-10	168.351	5.59133e-10	5.59133e-10	16.1476	5.59133e-10	5.59133e-10	5.59133e-10	193090	121313	320266	28825.7	887897	730994	1.09759e+06	165054
2-{[(3,5-dimethoxyphenyl)(hydroxy)methylidene]amino}acetic acid	42036.4	188472	234805	120607	44865	197155	884963	244760	946131	1.2754e+06	1.95835e+06	1.54349e+06	61431.2	111734	197233	55195.5
1-Ipomeanol	11511.8	15480.2	16407	11420.2	11414.9	16095.2	20918.8	12740.4	472902	600282	434228	384294	555868	609928	499593	712544
Maleic hydrazide	617452	533237	802441	668828	696004	789582	1.14129e+06	882814	565188	572942	910198	1.02309e+06	134464	224725	193146	141866
D-2-Hydroxyglutaric acid	99411	125809	116143	183995	168896	172774	188964	192114	890701	550841	1.5498e+06	937952	478783	661118	885110	777040
Lyciumoside VIII	612.387	285.77	232.666	3907.52	5.59133e-10	5.59133e-10	5.59133e-10	202.251	248112	31064.6	252399	19737.6	457051	1.23105e+06	1.2351e+06	123924
Catechin-4-ol 3-O-beta-D-galactopyranoside	39897.8	284846	557325	45221.1	131430	424879	423697	69616.7	1.05978e+06	669953	1.73573e+06	1.65979e+06	420737	234267	705239	540383
Penilloate	530630	989007	249856	635403	151887	503092	56298.3	213166	150927	147500	23540.5	5.59133e-10	432666	280635	241455	311449
KIRENOL	842.085	2106.5	1135.23	141.675	289.622	1478.67	2286.26	5.59133e-10	146866	853833	143873	11642.8	791303	1.73914e+06	588699	217656
2-(3,4-dimethoxyphenyl)-5,6,7,8-tetrahydroxy-3-methoxy-3,4-dihydro-2H-1-benzopyran-4-one	187661	229178	204677	11574.9	608065	502180	419452	195532	376557	244663	316036	416872	84679.9	49761.2	57819.5	56954.5
benzyl 4-(1,3-dioxoisoindolin-2-yl)-2',2'-dimethyl-3',5-dioxo-2',3',4,5-tetrahydro-3H-spiro[furan-2,9'-imidazo[1,2-a]indole]-1'(9a'H)-carboxylate	145213	140868	320798	8035.5	535070	381013	902600	31372.6	1.1709e+06	948459	1.9775e+06	1.59049e+06	383575	474172	578760	240005
3-Indolehydracrylic acid	5223.49	24926.2	24959.7	6876.97	4502.1	24123.5	12796.1	5276.2	120049	769225	606835	350244	264722	1.60217e+06	328367	732634
(S)-2,3-Dihydro-3,5-dihydroxy-2-oxo-3-indoleacetic acid 5-glucoside	5.59133e-10	5.59133e-10	5.59133e-10	5.59133e-10	5.59133e-10	5.59133e-10	5.59133e-10	5.59133e-10	162957	96529	28514.1	554079	320999	359254	730004	1.55475e+06
cis-4-octenedioic acid	14895.8	26250.6	20607.4	14516.1	14323.7	28339.5	25474.4	15964.6	352610	847066	494391	419867	433923	821792	451887	634396
Dinitramine	459297	221090	457386	530419	503658	272017	346437	1.0254e+06	53416.7	60093.1	54017.4	25056.9	49495.2	165493	65024.3	182458
Imidazole lactate	335279	444112	459810	839507	329894	404556	629476	1.09006e+06	50483.6	84134	185903	372759	36095.9	33979.5	50445.7	87446.6
1-(beta-D-Ribofuranosyl)-1,4-dihydronicotinamide	56759.6	46829.8	85647.2	46051.7	70960.1	77118.5	121750	54125.6	347383	251481	316928	314457	554997	586780	766466	633344
Spiramycin II	249658	70214.8	413358	196753	22587	35738.2	13093.8	38470.7	154993	121414	357224	57985.6	6904.73	155475	9076.98	12319.5
Benzoylagmatine	2301.64	2431.31	8125.56	5.59133e-10	1967.2	3220.64	6116.77	345.562	378738	845522	180419	62932.8	818095	866586	442890	341530
(4E,d14:1) sphingosine	267882	367234	417959	554864	586254	412144	372340	414031	943844	1.09739e+06	1.13577e+06	1.86795e+06	24247.4	288084	41726.9	219127
Canescein	261407	150397	206017	284735	27058.3	36015.4	15742.9	57527.1	26143.2	42355.2	50528.5	13617.4	5.59133e-10	925.865	5.59133e-10	662.867
Robinobiose	57681.1	120176	147610	4888.22	442630	435418	551747	150995	364510	503346	485552	611681	129517	170498	220676	125586
Aspartyl-Tyrosine	8193.65	5.59133e-10	5.59133e-10	5.59133e-10	24859.4	5.59133e-10	30574	5.59133e-10	449889	969969	743014	1.67046e+06	108.105	74515.6	10018.2	10467.5
N-ethyl arachidonoyl amine	390419	565541	472269	492926	229958	416468	265474	326406	339082	162584	154880	329586	5.59133e-10	28104.5	947.616	7217.03
2-{[(3,4-dihydroxy-5-methoxyphenyl)(hydroxy)methylidene]amino}acetic acid	1095.36	88236.4	41267.4	146055	939.973	7568.59	7678.66	3795.16	22202.8	182986	57235.6	18269.4	183751	1.37494e+06	399626	842535
Propionylcarnitine	528240	501385	818310	686516	534914	561485	525972	741960	158433	106197	288808	803168	2839.03	4933.69	12331.5	3405.71
Hippuric acid	9071.08	23272.5	13689.8	4728.86	4177.15	9623.8	9460.16	3904.79	419373	357929	626714	310632	392512	596218	658629	528762
PI(16:1(9Z)/0:0)	290611	489049	149636	270281	148365	191710	152381	139729	449383	655992	494059	382873	15579.9	72460.2	25508.7	41265.1
Taurocholic acid 3-sulfate	304244	104005	196418	462006	31336.2	57320.3	9481.39	82321.5	11923.3	37759.6	72275.1	3899.76	640.288	488.06	659.658	1602.47
N-(3-oxo-dodecanoyl)-homoserine thiolactone	10676.3	17407	14398.9	13489.7	6071.99	15427.6	7584.34	8262.76	272408	183558	83360.7	123947	511223	569083	640087	581367
11-cis-Retinol	5122.94	5703.35	6151.76	5438.55	7467.62	7298.07	10165	6175.6	130719	68529.8	101796	20892.7	481508	1.35136e+06	650158	202959
L-Phenylalanine	563478	567391	548465	403407	352545	392456	385715	344976	329879	214267	479843	358141	54132.8	89009.8	81985.1	60556
Physagulin F	164719	217507	142452	203143	252.042	9970.03	5.59133e-10	2935.66	4577.3	6141.48	17793.2	5.59133e-10	5.59133e-10	3772.56	2896.3	238.168
POV-PA	154208	130587	216322	48291.1	149134	175228	125071	115572	894033	699336	824073	1.59874e+06	6435.58	137020	19910.2	204852
Histidylleucine	427027	449252	176696	460048	129402	138967	43302.8	285067	52789.4	21301.1	53954.2	26496.2	23213.3	28805.4	14901.2	49799.7
Citbrasine	5.59133e-10	566.698	980.19	5.59133e-10	5.59133e-10	5.59133e-10	5.59133e-10	60.1261	15787	259120	170691	10042.5	508940	307215	953581	665479
Coroloside	183678	271090	57989.7	297243	5.59133e-10	1326.28	5.59133e-10	1673.71	449.923	5.59133e-10	960.637	5.59133e-10	5.59133e-10	5.59133e-10	791.024	4233.97
PS(16:1(9Z)/0:0)	277624	486331	161251	200959	104259	94169.3	86965.6	108627	185411	207546	213881	171309	23299.7	82790.4	35398.6	63986.6
2,3,4,7,8,9,15,22,23,28-decahydroxy-14-(hydroxymethyl)-12,27,31,34-tetraoxo-13,25,32,35-tetraoxaoctacyclo[14.13.3.3¹⁷,²⁶.0⁵,³⁰.0⁶,¹¹.0¹⁸,²⁶.0¹⁹,²⁴.0²⁹,³³]pentatriaconta-1,3,5(30),6,8,10,19(24),20,22,28-decaene-20-carboxylic acid	236276	73119.3	273240	226047	11588.5	38995.9	7863.39	36949.1	61285.5	56651.2	110581	22102.4	1137.53	42203.9	1897.59	1576.47
Acromelic acid A	5.59133e-10	11711.5	48119.4	5.59133e-10	269389	248263	989305	92239.2	463498	512821	703174	1.10397e+06	667.327	793.244	10047.1	3251.23
6-({3-[(1E)-but-1-en-1-yl]-1-oxo-1H-isochromen-7-yl}oxy)-3,4,5-trihydroxyoxane-2-carboxylic acid	141494	300535	217858	31408.4	495151	637042	582915	189011	440573	486428	670432	478353	122955	245835	156973	86459.8
PI(18:3(6Z,9Z,12Z)/0:0)	328937	217918	180663	231057	149167	234774	199523	208036	644711	998158	823214	815575	35053.6	188195	71509.2	93176.6
2-O-b-D-Galactopyranosyl-D-xylose	143781	191441	310169	367460	272322	260658	603905	709217	33075.8	127020	126244	532434	10857.5	5.59133e-10	20392.1	41008.9
L-Carnitine	650736	692207	910634	719776	859663	1.1247e+06	1.40657e+06	1.05896e+06	1.21645e+06	1.53826e+06	1.57081e+06	1.79635e+06	932882	1.20523e+06	994637	843841
3-Methylazelaic acid	9439.9	9358	15945.5	9657.02	9802.02	9564.28	14333.1	9356.6	348224	151235	178907	182110	647096	492243	514527	512281
5-Androstene-3b,16b,17a-triol	1054.03	2788.75	812.491	209.611	442.12	1709.91	125.496	494.905	118601	209238	154939	46598.1	475420	1.31816e+06	405300	347109
Aldosterone	161246	267188	88534.1	269669	5083.69	12367.7	1488.48	13664.2	1603.27	7954.28	20872.2	1926.83	612.873	1775.06	5.59133e-10	279.581
L-Hypoglycin A	8619.11	14899.7	20829.3	13789.8	12310.3	18843	36000.4	10928	146893	169406	125976	130494	279723	314910	885984	1.10226e+06
1-Hydroxytacrine glucuronide	5.59133e-10	5767.84	2851.74	5.59133e-10	5.59133e-10	327.257	318.21	5.59133e-10	141212	515520	67208	125536	689084	134158	570827	1.1632e+06
PC(14:0/0:0)	47485.4	84729	79414.7	31102.9	71784.9	77429.5	57431.1	47486.6	819676	646600	872718	935908	51298.4	187317	47096.5	222916
N-Glycolyl-D-glucosamine	174566	80605.4	111861	43590.2	417451	213659	568180	153630	793782	1.32162e+06	1.03287e+06	1.5699e+06	89851.4	234051	140549	159711
Propylene glycol alginate	308042	340932	811694	266834	551665	284658	1.04141e+06	247317	1.19798e+06	572363	2.45284e+06	1.42081e+06	349718	273444	484811	286306
D-Lombricine	5.59133e-10	20417.7	146444	5.59133e-10	33600	70456.3	240171	12141	601086	425812	1.71669e+06	1.19461e+06	71079.8	138923	232105	114486
Dityrosine	2845.08	10555.2	4737.02	1759.22	209.752	3367.82	3932.97	1654.61	56006.6	81863	126687	15930.4	536500	116818	1.28516e+06	610796
Diminazene	1375.3	2119.24	5.59133e-10	2533.07	8676.67	6893.51	5.59133e-10	5.59133e-10	2653.48	578.233	51292.7	5.59133e-10	73345.3	186196	1.46222e+06	1.09927e+06
Isonicotinic acid	546461	508721	778349	660031	708845	879699	1.39751e+06	1.00373e+06	1.33701e+06	1.04767e+06	1.78133e+06	2.26354e+06	646926	873232	746607	754755
Asparaginyl-Proline	76163.8	89252.8	148417	41053.7	91161.5	105481	178295	54764.1	206583	949898	547001	189514	401962	785835	1.37464e+06	377998
LysoPC(14:1(9Z))	44394.9	30772.3	35264.6	32905	38945.2	44164.3	38632.6	58257.8	787996	773026	480956	710233	12458.7	62049.3	27208.6	45110
PG(18:2(9Z,12Z)/0:0)	176931	141105	255475	70568.2	149455	177478	132855	123176	783869	633247	783850	1.474e+06	11333.3	108429	32206	142328
Isoleucyl-Arginine	446347	256088	96592.4	276448	56876.1	47593.6	20495.6	95813.2	43815.3	15650.9	16770.2	19115.1	30917.4	47864	24890.3	81005.4
Cyclodopa glucoside	1043.95	3447.26	6687.67	1161.58	5.59133e-10	3605.68	2230.11	3035.08	70546.9	27752	83246.9	227747	654281	299182	513270	649797
Farnesyl acetone	304579	780028	630753	308432	1.14213e+06	956536	673954	544364	1.13591e+06	1.22061e+06	1.05931e+06	1.59477e+06	103409	431145	189335	502766
FAD	602661	536125	561928	429326	598963	606954	668364	678294	651310	390867	550897	871697	29584.8	56850.7	41033.1	44341.5
3-(Cystein-S-yl)acetaminophen	940.709	362029	188935	255663	1347.17	5700.74	2662.68	2139.96	2273.95	896.948	668.542	8173.12	7905.12	3780.5	1347.35	2289.27
PA-PG	226093	154405	177107	140225	13310.3	29172.7	14581.3	26691.9	43347.1	31148.1	92223.2	14321.6	253.268	30073.8	845.331	5.59133e-10
Lercanidipine	5.59133e-10	76227.1	53625.5	5.59133e-10	192367	198893	334498	5.59133e-10	811362	708336	2.01622e+06	713259	307594	579420	679276	214178
Maltopentaose	346406	218798	514488	167761	219329	108035	354306	74412.9	547756	276788	841206	786816	158151	152452	63373.6	111728
3-(3-amino-4,5-dihydroxyphenyl)-2-cyano-N,N-diethylprop-2-enamide	597433	338910	160606	377790	220736	218291	170566	386957	213294	411246	1.03728e+06	1.11526e+06	15614.6	39250.8	37676.1	39151.3
Benzo[a]pyrene-7,8-dihydrodiol-9,10-oxide	603594	341641	392936	1.42028e+06	556163	641282	321853	1.09067e+06	39187.4	90559	187992	176699	156418	226653	332581	245635
PKOHA-PI	176271	242595	41773.3	301292	876.344	9625.02	2180.83	10815.5	1133.95	1113.67	4029.34	5.59133e-10	5.59133e-10	1.86233	5.59133e-10	1366.66
NeuAcalpha2-3Galbeta-Cer(d18:1/16:0)	5.59133e-10	12364.9	6652.27	5.59133e-10	9758.98	21299.4	1688.18	5.59133e-10	758938	614561	662923	460420	5.59133e-10	58472	5.59133e-10	81498
8-iso-PGA1	141.306	1202.61	150.872	5.59133e-10	5.59133e-10	1395.31	247.591	5.59133e-10	101361	180155	48241.7	8866.24	636828	1.1549e+06	452118	129074
Ketoprofen glucuronide	24682.9	39547.5	32528.7	24042.7	19581.7	26093.6	50616.2	28934.6	329287	266480	135994	88324.3	552333	360227	721937	454425
D-Maltose	219533	272504	560064	95861.4	388829	284025	935083	120355	878481	532057	1.90246e+06	1.24021e+06	92038.5	113832	131433	65264.6
N-Undecanoylglycine	722628	723163	910491	842574	1.01326e+06	1.04383e+06	1.37797e+06	975692	1.13727e+06	1.1467e+06	1.58351e+06	1.88989e+06	494397	654783	712112	546976
1-(gamma-Glutamylamino)cyclopropanecarboxylic acid	519153	962707	581298	627385	490152	719265	674945	408998	348546	479391	796170	561830	120099	161653	215319	176470
HEUDELOTTIN C	771.326	694.439	7691.38	3337.21	368.913	5.59133e-10	428.011	1968.89	142905	57104.9	49078.3	312417	805427	163646	267693	1.22019e+06
Uracil	590442	502877	724234	581117	681297	742766	968847	743826	526025	581656	887276	920667	196042	353011	312941	211536
MG(0:0/18:1(9Z)/0:0)	193576	216744	247247	145882	216618	252318	290215	145521	656381	996692	1.13931e+06	987888	133024	269247	182005	182098
Dikegulac	250448	54341.6	117272	81768.1	330592	350876	447809	506076	604230	754777	1.40015e+06	1.02347e+06	21621.7	72416.4	95968.6	46394.5
L-beta-aspartyl-L-glutamic acid	110158	176696	166675	48080.6	364582	230668	394452	98591.7	731328	678076	1.62425e+06	1.34923e+06	183143	126128	235173	83502.1
{[2-(10-{[2,2-dimethyl-7,10-bis(2-methylbut-3-en-2-yl)-8-oxo-2H,8H-pyrano[3,2-g]chromen-5-yl]oxy}-8,8-dimethyl-5-[(2-methylbut-3-en-2-yl)oxy]-2-oxo-2H,8H-pyrano[3,2-g]chromen-3-yl)-2-methylbut-3-en-1-yl]oxy}sulfonic acid	815558	361010	619245	769152	681720	728455	522478	556660	269178	121583	221006	195005	260508	233402	110868	90709.2
Norepinephrine sulfate	103429	296400	431516	185806	260399	447410	644956	315052	79223.4	86412.2	247096	467199	8533.37	23550	35618.3	50418.5
Butyl (S)-3-hydroxybutyrate [arabinosyl-(1->6)-glucoside]	138759	249938	171792	18344.9	356095	529399	451151	132584	272813	275806	417575	220257	93286.2	176650	114358	50859.5
(-)-12-hydroxy-9,10-dihydrojasmonic acid	6339.28	6999.3	14027.8	6161.11	10424.3	10410	16796.8	7925.5	159942	220923	133494	178140	526449	442789	388877	500001
Cilazprilat	152843	278896	111276	324343	27841.6	48260.2	29934.2	53629.6	6777.01	22659	13769.4	10485.7	872.53	3692.07	3532.54	3745.43
Mascaroside	192524	125036	116616	258512	11725.7	28266.1	8531.17	27882.2	24670.6	24084.7	58013.4	20687.1	5.59133e-10	8711.83	663.684	5.59133e-10
MG(18:2(9Z,12Z)/0:0/0:0)	81418.3	106431	143242	67633.3	182099	194650	188914	122945	695962	1.09441e+06	950664	882210	20714	582336	58544.7	297742
Isoglobotriaose	56294.9	210851	235364	7384.96	319817	295062	631564	53486.9	744818	832061	2.23382e+06	852038	353841	601130	623255	258233
Docosanamide	97122.4	89332.3	117312	95563.5	143627	366154	191529	345767	149509	173752	198452	231517	91113.8	86910.7	95375.3	92475.5
Fluphenazine enanthate	51472.7	59892	30316.4	69646.2	11547	28792.9	16703.6	22877.2	81571.5	259642	56316.9	28579.5	476430	597800	456897	493594
N-gamma-L-Glutamyl-D-alanine	317727	356232	525507	366381	632697	670089	1.01242e+06	482791	1.07842e+06	839073	1.25368e+06	1.57127e+06	255578	532067	363878	292670
N-Acetyl-D-glucosamine	313661	610087	249949	397330	151980	342094	155084	183541	338959	230845	171773	498263	650432	586527	520859	1.12437e+06
Dihydrotestosterone	1993.45	4322.41	1054.7	360.206	1228.12	3026.69	1044.69	232.431	143154	286718	74492.8	13110.1	551126	1.17766e+06	467797	101266
diginatin	163895	151077	95018.9	178735	2544.95	656.094	5.59133e-10	939.856	875.941	5.59133e-10	7822.58	5.59133e-10	5.59133e-10	0.0618352	5.59133e-10	109.988
Asymmetric dimethylarginine	11177.8	16865.1	5415.66	5607.66	9413.53	11456.4	4038.6	5112.22	520043	356209	35811.6	115565	862625	666770	262451	237258
Limonene-1,2-epoxide	683950	755815	941628	860363	986809	1.04938e+06	1.40166e+06	979244	1.14478e+06	1.19756e+06	1.64684e+06	1.97248e+06	600167	743019	766663	616169
L-Acetylcarnitine	14979.4	12832.1	35772.7	13630.9	158205	81995.1	313779	64224.9	487627	843068	742303	1.17552e+06	280817	385974	512487	320406
Sterebin E	5.59133e-10	111.104	5.59133e-10	5.59133e-10	5.59133e-10	5.59133e-10	206.519	5.59133e-10	90242.6	68392.6	184446	11104.4	523879	567477	727379	108520
alpha-L-Rhamnopyranosyl-(1->2)-beta-D-galactopyranosyl-(1->2)-beta-D-glucuronopyranoside	12893.1	135671	58858.5	9072.82	95451.8	339995	297660	101025	40206.6	54020.9	49404.4	80435	31059.1	39237.3	41485.5	39339.9
Mycalamide A	137353	158955	82890	222955	73.7278	1318.77	5.59133e-10	2527.68	45.913	2294.33	3174.68	30.8907	4612.34	5126.75	2945.73	2164.99
(R)-(+)-2-Pyrrolidone-5-carboxylic acid	508174	613428	685201	415270	632166	808534	809631	574474	925568	1.38102e+06	1.33593e+06	1.9613e+06	310447	486161	529305	366487
Deoxytubulosine	16755.7	12495.8	4786.39	12582.4	2425.81	1930.87	359.165	1114	105072	194930	16963	16070	465603	553353	402453	381898
Salicylaldehyde	59451.9	367476	332409	155052	68910	85483.8	186459	94188.1	328102	264237	533792	818866	38298.4	103637	71083	104075
D-Ribulose 5-phosphate	323028	206362	133392	303885	69121.6	39612.4	31247.1	158808	84683.7	29676.5	7024.45	5.59133e-10	2340.94	5004.41	2635.03	3868.51
Phosphohydroxypyruvic acid	606527	630339	783324	732193	877579	956190	1.21552e+06	877007	1.00031e+06	1.02839e+06	1.43172e+06	1.67727e+06	548873	641774	689675	555162
3-Hydroxymethylglutaric acid	395770	344446	355624	249298	364778	313465	402328	200243	654043	614278	819636	746215	594509	550797	929080	730571
Homovanillin	26854.7	38768	44958.5	35931.4	32721.1	42889.7	68617.5	40832.5	314390	184468	317188	225328	350349	389907	912485	380445
Acetyl-maltose	230695	403377	319680	75307.1	542657	663153	665901	244999	487407	591933	851801	687626	155680	295331	267961	127208
Cyclic GMP	378312	436795	358522	276757	170922	253669	249680	267718	336297	115077	262303	387166	24530.6	94855	9775.77	46645.9
PI(18:3(9Z,12Z,15Z)/0:0)	156976	94826.5	70550.3	54781.5	84665.5	116896	85524	94059.2	525564	705702	657291	607606	189192	603641	217649	502101
GalNAcβ1-4[Fucα1-3]GlcNAcβ-Sp	306.616	341.573	5.59133e-10	567.087	188877	128638	65073.2	82105.9	25799.8	19668.7	27692.9	11709.9	46760.2	81421.1	72145.2	72791.9
N-ACETYLPROLINE	130222	149930	206981	170148	171167	201481	309052	182925	368070	584450	462831	487922	559401	657951	561179	581336
N-arachidonoyl histidine	1513.25	995.606	2673.82	1018.1	328.264	539.345	5.59133e-10	22.8565	105511	85557	93845	75408.4	717317	157385	642425	347456
N-lactoyl-Leucine	398650	321449	367495	692990	521421	362036	274305	590264	111724	16919.4	70235.7	344834	11021.4	13672.2	18447.1	12611.6
3-Oxododecanoic acid glycerides	225567	159779	64568.3	229886	10357.9	33626.5	2860.61	24652.3	7963.64	16387	19781	1452.26	0.145241	921.177	598.648	5.59133e-10
Tazarotenic acid	46508.1	1187.64	1069.14	31982.5	245299	41691.5	393188	27053.7	465473	393787	1.24481e+06	1.4462e+06	2828.71	5.59133e-10	2656.7	5.59133e-10
PC(19:0/0:0)	217319	275352	225376	154274	718651	328551	350185	195908	260318	364820	184761	314629	5.59133e-10	26682.6	3727.04	21502.1
3-O-beta-D-Galactopyranosyl-L-arabinose	138131	198405	114476	186783	200711	229126	416276	353332	5.59133e-10	27897.9	53242.1	304627	5.59133e-10	5.59133e-10	5.59133e-10	5.59133e-10
Tyrosyl-Hydroxyproline	485529	463746	625802	434811	645810	657347	1.05547e+06	615208	786079	585973	1.17076e+06	1.17007e+06	194810	446397	299046	218862
2-methyl-dodecanedioic acid	954.68	9460.31	2454.67	3296.65	374.159	8265.32	1248.36	2348.6	180015	245214	115327	85322.8	560988	479488	312160	356632
Flunarizine 4-oxide	159526	186453	57417.7	234060	4583.88	11886.1	1085.96	19875.1	1561.51	7983.66	6876.6	502.587	47.5069	524.651	9.25575	302.014
Ethyldimethylaminopropyl Carbodiimide	6552.93	10203.9	3336.43	3116.7	7732.89	7379.67	3595.67	3243.47	428643	245035	45127.7	72043.1	715693	491815	372978	210572
DIHYDROMUNDULETONE	10421.2	2979.34	8186.48	10899	129805	143159	96996	100580	13655	6118.77	15493.1	3927.94	4086.21	4830.27	5584.5	6416.45
S-[1-[2-(Acetyloxy)ethyl]butyl] ethanethioate	2070.29	5088.74	6388.09	1133.28	37502.5	18178.7	19769.9	14194.5	139274	154571	87200.2	54185.7	520924	495195	349692	333075
5-Hydroxyindoleacetylglycine	2097.01	3314.84	2298.23	2488.36	1740.11	1575	2059.29	2797.74	92081.9	50371.8	71911.4	134447	288408	450894	502915	388272
alpha-Antiarin	184396	108165	142502	223942	17732.7	27176.8	9928.99	45425	12889.9	26448.3	40420.1	6913.02	676.919	4028.71	2325.33	549.471
Pectic acid	68370.5	52367.7	46521.5	55689.4	418800	225545	531926	170581	560580	612800	767494	1.08226e+06	30057.8	56228.8	108056	47872.3
Maculosine	5.59133e-10	2294.7	1937.92	5.59133e-10	5.59133e-10	5.59133e-10	296.902	123.552	41313.9	339164	104359	17633.4	389953	547863	504448	307029
Cholestane-3,7,12,25-tetrol-3-glucuronide	183316	139804	100757	154276	14362.9	17410.5	2872.6	19157.2	15523.3	12971.5	49316	2732.33	5.59133e-10	6974.68	1005.12	562.753
Glutamylproline	14972.8	57673.9	19443.9	16462.2	17125.6	51757.3	29824.2	18628.1	138756	137493	93465.9	126956	384647	423890	338772	592483
Glycerylphosphorylethanolamine	750560	843711	769944	701854	769944	992918	1.27988e+06	882967	1.23117e+06	1.14206e+06	2.12731e+06	1.39021e+06	1.20395e+06	1.10502e+06	1.64336e+06	887136
Galα1-3[Fucα1-2]Galβ1-4[Fucα1-3]GlcNAcβ-Sp	143951	58147.1	142136	291226	9777.83	17072	5.59133e-10	3386.35	5.59133e-10	1475.38	29775.7	5.59133e-10	5.59133e-10	1096.69	5.59133e-10	5.59133e-10
Serylvaline	274229	241271	261163	292567	530690	514898	505246	340087	489298	346735	403239	650187	246818	239720	243275	284252
Flazasulfuron	821965	580073	596556	500407	915285	839504	568502	521242	810181	605048	706203	520455	282647	219218	219520	223813
D-Biopterin	16610.6	503.567	3869.9	3060.58	149637	62301.8	322275	27920.1	373084	712948	969027	1.26442e+06	45051.3	309528	348100	165287
Asparaginyl-Cysteine	356142	173436	84002	245311	736851	213227	118590	353368	70111	9980.31	24358	667.345	197741	94271.3	64296.7	43586.8
Yucalexin P17	5.59133e-10	274.143	5.59133e-10	123.679	5.59133e-10	158.104	5.59133e-10	5.59133e-10	111252	118600	152859	22519.2	736684	323049	596971	127702
glycodeoxycholic acid	5.59133e-10	5.59133e-10	600.287	5.59133e-10	5.59133e-10	5.59133e-10	625.291	5.59133e-10	147238	7626.47	97097	26062.5	616938	171304	719174	268909
Treosulfan	196442	382929	405102	528927	151171	307044	148208	414985	266504	98426.2	162928	267824	3946.59	20710.6	0.193503	683.567
10,11-Dihydro-12R-hydroxy-leukotriene E4	7659.14	6921.76	2959.66	5446.24	0.00112408	635.264	0.869008	462.899	110452	125784	14023.4	17384.7	436478	469122	350991	362623
2-(4'-Methylthio)butylmalic acid	60000.1	63690.2	33857.4	16902.3	271263	164055	236186	57579.3	53139.4	32660.2	120115	90954.2	33693.2	47835	10250.8	660.359
Stenbolone	199.498	670.714	211.488	5.59133e-10	5.59133e-10	360.545	362.964	5.59133e-10	82182.8	426125	96513.8	6652.43	473919	1.00667e+06	400113	137135
4-Hydroxy-3-methoxy-cinnamoylglycine	1146.52	9158.12	11436	2785.56	1468.83	10232.7	7361.49	2052.94	69576.1	498567	421814	242540	175962	1.07892e+06	196424	436822
Mannopine	286899	308999	567975	224706	283244	211875	473628	174761	330223	126249	841196	598947	4000.63	4472.44	15651.9	1155.15
3-Hydroxy-8,9-dimethoxycoumestan	13932.2	1560.34	25428.4	22104.6	17569.5	13342	16573.7	15224.3	182141	127778	52327.4	158265	323446	298525	426221	691244
(S)-5-Hydroxymethyl-2[5H]-furanone	40224.4	46590.9	79509.3	46867	76526.2	82032.5	146532	54864.6	121752	184454	217785	337898	356209	222626	556739	933994
3,4,5-trihydroxy-2-[hydroxy(3,4,5-trihydroxyoxan-2-yl)methyl]-4-[3,4,5-trihydroxy-6-(hydroxymethyl)oxan-2-yl]cyclohexa-2,5-dien-1-one	221123	55755.5	126807	82865.8	310480	313080	421664	417801	423196	478168	890293	764125	14859.5	52903.2	58622.3	24381.2
PKHdiA-PS	5.59133e-10	29523.6	53554.9	9397.21	66580.1	125674	149144	192248	24231.8	2089.38	5.59133e-10	5.59133e-10	1848.48	1631.47	5.59133e-10	1994.93
Trigonelline	216132	382505	185511	275134	217135	393152	177905	215775	406032	370949	254545	394375	646119	969951	365248	795613
CAY10641	514178	223879	643616	586559	357463	440592	513704	491751	73305.4	85816.5	204034	130702	132744	110172	68080.1	108713
(R)-Pantothenic acid 4'-O-b-D-glucoside	140405	152889	260362	79466.5	26182	40016.1	46099.9	41948.8	151062	73988.3	362199	233878	13761.6	21294.8	21614.5	31907.5
13,14-Dihydro-15-keto-PGE2	5.59133e-10	201.852	5.59133e-10	5.59133e-10	785.544	184.555	634.112	5.59133e-10	86943.5	143530	67943.7	16867.5	394987	859745	281257	235127
LysoPC(20:5(5Z,8Z,11Z,14Z,17Z))	13788.6	57061.4	104059	65286	78984.4	77114.8	108691	107175	317430	349058	1.00746e+06	1.22289e+06	4945.51	44306.6	22431.8	153083
Glycyl-Phenylalanine	469716	237836	95597.6	289641	104872	75573.5	35592.1	138564	94627.9	43063.7	70836	45791.3	66892.4	151289	69531.3	185231
desmethyladinazolam	9508.22	6345.17	8388.18	8817.46	11343.9	10985.8	9354.17	14455.2	171933	100114	37794.1	104455	379909	410789	251267	539276
19-hydroxy-nonadecanoic acid	16753.1	139581	259686	4184.52	2053.69	2012.78	2545.67	672.91	580268	454118	235625	207639	13972.2	342206	76935.1	68249.8
methyl 8-[3,5-epidioxy-2-(3-hydroperoxy-1-pentenyl)-cyclopentyl]-octanoate	116660	184082	92628.4	118509	3964.58	7564.22	567.07	3895.31	5370.6	6701.18	18029.2	1360.04	19157.7	30552.9	17157.6	2525.9
N-Glycolyl-D-mannosamine 6-phosphate	13259.5	5.59133e-10	5.59133e-10	5.59133e-10	79505.9	27040.8	142575	4710.1	522994	673500	495675	885012	7280.09	50761.9	64767.1	32288.5
4-OH-Retinal	4744.33	3471.74	7848.08	1725.38	5064.04	5151.37	5324.33	1732.66	83784	136638	473974	17156.7	773171	614714	355188	94615.5
Loganin	119807	123769	134305	83705.9	211589	220804	248779	67227.9	273303	248152	322447	273384	356958	503903	611866	414582
Citbismine F	17458.7	27552.7	21132.9	234611	82658.7	33752	31731.5	483619	674242	337460	1.00212e+06	802804	68561.2	59717.1	188262	70003.6
4-Methylhippuric acid	12541.1	16335.1	14520.5	8321.52	7625.85	9260.26	12176	7675.19	447021	231259	694540	256145	290132	485851	295775	279622
PC(17:1(9Z)/0:0)	55297.2	158215	104870	26488.8	129958	135836	63844.2	69978.1	499057	471521	567739	1.38469e+06	5715.57	124947	13415.9	230456
Lysyl-Phenylalanine	306313	199618	78887	150549	34159.4	39938.9	7298.39	63200	34772.9	14456.6	13796.8	4167.26	17446.2	42696.5	10959.1	39843.9
4-Formyl-3-(formylmethyl)-4-hexenoic acid	3616.57	5109.55	6278.84	3190.53	3116.17	4997.28	8039.92	3766.69	174986	130712	74699	109669	469099	380022	350472	259934
D-altro-D-manno-Heptose	192768	125959	241980	178355	269583	201736	347490	236965	199161	264443	357077	387108	411955	378545	975531	552147
Methyl n-formylanthranilate	8953.05	16924.2	18427.2	12424.6	10065.5	13186.7	24868.4	13539.5	200186	210317	319010	192933	251742	342485	526027	347718
Phosphatidyl glycerol	625175	809372	475471	444780	735176	835516	861293	565797	1.36231e+06	1.09747e+06	1.78636e+06	1.20248e+06	570535	479388	990115	417611
Phytocassane B	93.086	1052.36	351.787	111.574	5.59133e-10	143.257	179.406	5.59133e-10	66448.7	174205	146206	9057.01	447857	618658	330462	177217
18-Oxocortisol	269.71	1824.04	453.059	173.671	5.59133e-10	500.491	5.59133e-10	5.59133e-10	115295	50603.8	27995.4	100653	567816	518753	229635	236899
(±)-Borneol	540506	591105	737620	671892	790269	839659	1.09044e+06	764629	917652	958810	1.33594e+06	1.5118e+06	482802	586768	607909	488881
Norophthalmic acid	145186	94157.4	193807	87484.6	190214	209070	320269	122225	507742	634995	876317	968077	231424	613738	382996	333341
PE(O-18:1(9Z)/0:0)	215531	471448	444150	310703	343134	301210	224377	135869	741729	690943	538518	761122	24125	734784	104228	361341
PKOHA-PG	58729.1	101854	226511	34393.1	111692	112049	252259	39475.5	516049	404822	970413	752164	300.594	19901.1	10962.1	6086.49
Gossypetin 7-methyl ether 8-acetate	477731	208665	264590	454208	325503	126591	161256	633829	13786.2	14595.9	10288.8	5.59133e-10	1598.46	10733.6	5.59133e-10	27531.5
N-cis-Caffeoyltyramine	24026.3	35876.2	34448.9	43014.4	187967	108996	196688	122410	86040.2	168555	100286	81557.1	160792	161681	314267	152370
Behenoyl-EA	168629	158845	209183	164503	266771	379968	346142	343312	259563	295636	357792	411980	150538	156164	161918	151497
Pyrrole-2-carboxylic acid	64562.4	63550.1	77960.5	47988.6	74665.9	94592.2	123036	49061.6	274915	323015	295184	188585	390801	581004	411146	312142
Herierin IV	100198	90391.5	130262	100209	123143	167437	157549	165333	312253	502989	451746	516124	440322	467619	409750	448945
Yucalexin A16	5.59133e-10	5.59133e-10	408.557	345.055	5.59133e-10	5.59133e-10	291.345	885.48	61496.6	47082.4	144397	4143.84	415646	427044	553678	102570
6'-Apiosyllotaustralin	76944.8	68098.5	54101.1	54958.5	183568	149971	172837	120936	72466.4	41338.7	51352.5	40515.2	54474.1	77093.2	61594.1	81587.5
Debromohymenialdisine	4163.77	58647.8	71878	16973.6	73896.9	37155.4	368931	4880.16	400231	631171	701796	1.08028e+06	1844.02	5650.31	42319.7	7206.87
Disopyramide	12611.4	15953.2	6511.77	14189.8	1994.21	2666.98	753.434	3319.64	147966	162636	21715.6	29311.1	452571	371556	232708	403944
Phenobarbital	4563.27	18505	4897.03	3620.83	1716.64	7755.67	3223.96	697.295	337041	268509	53751.6	94129.9	408766	706829	193884	288710
Glycylleucine	463329	221720	88519.8	297524	120429	78585.6	29903.9	155261	105531	36003.6	77347.4	25669.8	60960.1	174360	53555.2	106140
gamma-L-Glutamyl-L-pipecolic acid	385545	443404	320691	338797	274747	312583	210203	297780	104392	80551	70604.9	71010	28586.6	74681.2	44330.3	38458.8
Methenolone	772.794	280.342	5.59133e-10	5.59133e-10	427.516	125.675	5.59133e-10	5.59133e-10	57357.7	124394	66289.4	1300.17	331109	651644	498811	92259.4
(-)-Cladielline	5.59133e-10	5.59133e-10	5.59133e-10	5.59133e-10	5.59133e-10	5.59133e-10	5.59133e-10	5.59133e-10	64002.3	21677.6	54610.3	3512.96	314145	592718	544659	79011.7
DOPA sulfate	5.59133e-10	5.59133e-10	5.59133e-10	5.59133e-10	5.59133e-10	5.59133e-10	5.59133e-10	5.59133e-10	85250.9	53691.4	12571.1	77425	310699	235983	321339	592075
<i>para</i>-hydroxyatorvastatin	3145.47	1344.23	2774.18	498.454	6805.73	8548.62	2549.03	1889.53	276368	154056	57494.4	440334	674310	66869.2	275757	673008
Cytochalasin Ppho	54123.9	56630.8	45905.8	46600.6	141026	35597.2	236905	40412.1	712286	563912	547679	656914	155417	226023	152896	254081
N-stearoyl valine	602933	628226	739653	671554	884846	774378	1.03079e+06	769342	934816	978243	1.25561e+06	1.51833e+06	421905	603843	501166	543475
Cystathionine ketimine	182483	471703	500024	254626	235687	346700	462929	362223	90725.8	58460.3	261855	372831	2975.32	14188.7	13641.4	26681.2
17-hydroxy-1-oxo-2,3-seco-androstan-3-oic acid	4314.61	12451.1	1945.4	1311.35	4050.48	29014.5	4246.57	696.541	194945	21903.1	18273.2	23184.9	470074	620892	171772	286097
LysoPE(22:2(13Z,16Z)/0:0)	39267.6	55592	85272.6	15501.5	88879.6	59858.7	46554	38386.2	418711	333282	547962	1.20887e+06	2836.98	74193.1	9946.95	104515
gamma-Glutamylmethionine	420111	307022	473114	289410	414464	389574	432506	343413	339837	67423.2	262188	130158	33461.6	104858	24792.8	23443.4
Arecoline	6877.26	11692.9	8718.03	5209.96	5414.54	9312.13	8626.21	4675.96	252283	217949	167839	145926	323455	431253	354790	219525
6-Mercaptopurine	203917	202491	259488	184452	348206	441118	414890	384736	366653	244444	227671	671221	124823	234632	109074	116643
omega-hydroxy hendecanoic acid	1539.01	2133.56	2384.44	753.281	1154.61	763.375	1436.19	305.707	333732	206309	75557.9	113648	543760	240347	291288	258196
Tetrahydropentoxyline	32417.5	30815.4	14872.6	26728.3	28752.7	66822.7	16836.6	24865.7	110703	52711.9	43760.6	77004.6	317067	567713	160023	463231
Aminoadipic acid	148350	169358	237642	208759	204124	218464	355334	242667	332125	460455	483513	674684	359517	440788	550180	998132
6-(2-Hydroxyethoxy)-6-oxohexanoic acid	6757.08	7599.33	11611.5	7965.53	5543.55	8725.31	9890.29	7681.98	283415	339696	168807	166063	376426	294663	270266	264578
deoxyguanosine 5'-monophosphate (dGMP)	133003	291726	417857	152451	100238	152091	174944	149817	257189	257481	120297	289246	8884.14	43953.9	35580.2	23187.3
2-Acetyl-1,5,6,7-tetrahydro-6-hydroxy-7-(hydroxymethyl)-4H-azepine-4-one	5839.53	5579.95	6231.44	2312.35	3830.4	2884.86	7793.49	3472.47	63000.8	158940	71606.7	98492.6	338834	267232	367696	350358
Gardoside	117601	22506.8	58348.8	30036.6	267049	186160	368051	273278	356422	559651	1.02167e+06	655141	13948.8	45253.6	48242.3	25907
L-2-Amino-3-(1-pyrazolyl)propanoic acid	551445	537142	710555	502185	614150	736336	1.1378e+06	700881	1.03848e+06	852862	1.19422e+06	1.5289e+06	419963	497014	644487	496168
Thiamine monophosphate	54010.2	39888.6	85943.2	36274.2	167562	163314	628931	120357	237347	234395	455681	568943	7241.04	117902	101641	43654
3-Hydroxydodecanedioic acid	1550.04	599.668	834.883	109.976	992.294	135.092	199.048	5.59133e-10	103886	133141	88704.6	131571	363354	255196	269877	414864
N-Acetyl-b-glucosaminylamine	9483.94	12943.2	6242.55	6705.66	8185.51	31376.7	6601.16	3156.73	268661	171734	78039.2	33748	480636	468204	326554	165754
(1S,2S,4R,8S)-p-Menthane-1,2,8,9-tetrol 2-glucoside	2397.16	6356.99	3716.63	2032.04	1135.37	2991.05	3341.51	1440.91	123760	107281	164854	192083	351137	65299.2	570653	508501
Physagulin C	105721	45496.6	21464.1	57957.7	40157.9	52491.9	34043.2	50717.8	508704	505193	400827	293672	82897.6	270756	120697	167658
(2S,3'S)-alpha-Amino-2-carboxy-5-oxo-1-pyrrolidinebutanoic acid	275570	376357	244017	400250	174153	260325	249731	159120	120057	171027	302494	207436	93439	122921	100955	86127
3-Hydroxymethyltriazolopthalazinone glucuronide	75.7696	4897.26	4971.1	157.911	45.2342	555.978	995.57	5.59133e-10	84825.5	385169	190691	32766.5	238158	385132	517371	270169
L-Glutamic acid n-butyl ester	464638	493317	484906	195526	413586	473572	628119	276507	504972	369999	736857	764239	71312.5	143805	102594	62430
Nω-Acetylhistamine	5343.81	58347.2	5.59133e-10	5.59133e-10	4430.06	54787.1	5.59133e-10	5.59133e-10	256592	96979.4	48547.1	79418.3	845957	237369	290370	251474
Uridine 5'-diphosphoglucuronic acid	94711.6	71900.9	115808	130284	1029.28	23294.2	19011.6	3856.12	51729.5	60457.8	126598	44698.3	3224.87	9322	617.445	6921.13
PS(18:3(6Z,9Z,12Z)/0:0)	170899	247530	102369	87553.7	113528	118202	64312.2	91476.6	397239	449814	522420	535814	52852.7	254290	72700.3	243235
MAM-2201	70445.8	96338	217847	342.122	100632	109869	267808	3825.4	544983	232441	1.43002e+06	591804	88514.8	101441	141479	75535.6
3,4,5-trihydroxy-6-{[(2E)-2-methylbut-2-enoyl]oxy}oxane-2-carboxylic acid	404048	368085	446834	298740	577572	514492	599309	355208	587613	498530	778784	932092	88048.5	182895	192769	73477.7
Disperse Yellow 3	442084	272236	237877	411972	261588	240119	256149	235078	80528.3	86177.1	104254	119932	23666.8	23758	58513	44453.2
PG(14:0/0:0)	26472.9	150759	237568	7061.06	931.161	2480.2	1969.58	1266.09	196102	106671	109148	99682.4	28006.9	49381.1	48208	11888.5
3-Furanmethanol glucoside	4986.2	10249.3	18586	6661.66	3581.75	10499.3	13816.8	4533.18	65409.2	220978	136203	169536	253814	668591	179586	320446
Cyclic pyranopterin monophosphate	254398	416802	458540	83008.7	101012	285517	266357	130526	154743	142310	152954	117391	25052.4	61347.9	23167.8	34994.7
Methyl (Z)-3-hexenoate	289292	260993	452885	189227	393468	477348	700500	249869	785820	837776	1.21249e+06	713354	451471	891354	700544	329646
Gluten exorphin A5	135372	112460	33815.9	184491	140.251	4869.05	5.59133e-10	2088.72	6.66523	2544.35	5.59133e-10	590.696	5.59133e-10	721.923	5.59133e-10	5.59133e-10
PS(20:4(5Z,8Z,11Z,14Z)/0:0)	310767	365895	180165	229311	230966	197030	148835	130874	191234	204721	234318	179870	2657.34	75379.1	12965.5	53586.7
Spironolactone	2676.97	19896.6	24.5324	525.054	94070.6	103801	87785.7	70035	14094	8395.89	11396.4	10224.7	3872.77	7923.62	4294.5	7501.39
(±)-Furaneol	168697	180800	215378	166121	385649	270156	449461	236840	770349	631087	797538	1.10553e+06	287807	383211	460653	261426
HC Blue No. 2	9697.62	14446.2	6644.53	5546.25	90754.6	88646.5	96891.2	97463.6	55860.9	18671.6	50790.4	23342.2	20437.3	18007.2	19594.5	31185.3
N-lactoyl-Valine	490305	500861	434445	202899	392803	461403	557749	254243	513738	394072	773426	873099	93167.1	162576	134711	101037
Ganoderic acid F	123583	219014	58877.4	81264.5	63389.6	84430.9	50816.1	60615.9	344997	525003	379562	315228	87841.1	193030	76728.1	195898
Glycyl-Arginine	244360	283286	162663	226118	86937	132522	12655	185206	47141	2365.6	19342.6	5.59133e-10	5528.42	9801.1	7693.5	4756.77
Icilin	508248	554153	370858	342640	337828	584005	545445	327642	636137	640628	1.09556e+06	1.05079e+06	191122	413890	309719	135192
L-2-Amino-5-hydroxypentanoic acid	499312	467976	399524	574568	369808	478588	390389	418839	535017	786544	700455	987970	252284	509103	256529	472786
CAY10500	4232.59	7635.45	3188.22	2756.71	1987.09	2292.8	5.59133e-10	562.935	87497	143253	28335.2	24518.7	304951	342510	292891	306482
(2xi,6xi)-7-Methyl-3-methylene-1,2,6,7-octanetetrol	2449.56	3793.03	4367.49	2340.25	3644.68	4433.41	6915.55	2190.31	300434	220813	88653.4	122249	415954	472643	167937	246473
Aspartyl-Histidine	355628	280971	244411	381380	246807	237716	263344	180802	197247	127132	315214	236457	39922.7	69610.4	48524.6	41311.7
Serotinose	402590	93866.4	368659	461578	420226	160047	327651	435477	55257.8	10661.3	23702.5	10553.7	107882	7167.39	19441.1	32050.6
1-(3-Methyl-2-butenoyl)-6-apiosylglucose	84976.3	195628	363599	259490	188364	175397	522048	386101	56736.8	30569	204427	310229	4233.24	26250.7	9046.45	6763
BEBEERINE	2979.42	5.59133e-10	14350.1	7011.54	58851.7	102201	215117	60249.9	5471.99	14506.9	62507.8	12456.5	3064.35	1652.58	6767.29	1075.54
gamma-Glutamylthreonine	367123	367862	508812	330693	580897	542627	736198	429779	691140	466240	813291	701235	216413	377939	237643	229203
2-amino-4-({1-[(carboxymethyl)-C-hydroxycarbonimidoyl]-2-{[2-(3,4-dimethoxyphenyl)-1-{[2-(3,4-dimethoxyphenyl)ethyl]-C-hydroxycarbonimidoyl}-2-hydroxyethyl]sulfanyl}ethyl}-C-hydroxycarbonimidoyl)butanoic acid	83.6223	5.59133e-10	5.59133e-10	5.59133e-10	5.59133e-10	861.097	5.59133e-10	5.59133e-10	6322.99	113302	23250	1382.62	180749	116032	946272	347930
METHYL ROBUSTONE	136806	244732	187685	40367.3	372710	457817	440703	136913	356212	428379	607240	447801	117464	243274	181853	91424.7
N-Nitrosopiperidine	56432.2	46085	36843.7	118977	71004.6	52435.1	51952	111736	210988	249775	70252.6	146342	431436	354152	411072	285011
2-Phenylacetamide	72716.5	263685	290210	155626	99355.1	96841.6	205687	105916	315514	230443	495328	714285	58413.9	107570	85956.5	121383
2-Fucosyllactose	26227.8	60028.6	74188.5	14340.7	227612	136779	337759	20919.9	481743	386846	849469	756522	251746	190657	391625	225947
PC(20:2(11Z,14Z)/0:0)	31024.3	48443.5	47424.6	24590.9	58515.8	88799.2	47672.7	35893.4	457139	450259	485191	423994	5.59133e-10	18134.7	4291.37	14433.6
1-O-E-Cinnamoyl-(6-arabinosylglucose)	160878	296928	462520	344925	139988	167951	447535	464161	8340.08	9917.53	118994	120970	5.59133e-10	5.59133e-10	5.59133e-10	5.59133e-10
4-(3-Pyridyl)-3-butenoic acid	14157.5	14452.6	19278.4	15169.9	21405.1	20349.1	35723.4	18924.7	27117	52590.9	70383	56739.1	35172.2	145736	907632	603772
2,6-Nonadien-1-ol	482770	499046	612663	572823	687917	695527	902147	629888	800237	789115	1.10979e+06	1.27899e+06	372863	478011	496251	403410
Retronecine	10479.3	14995.9	13035.7	11466.7	10357.1	14396.4	16075.6	11875.6	161121	176707	90703.6	116934	313950	357433	280828	255690
cis-12-Octadecenoic Acid methyl ester	29747	93911.7	92247	65444.5	43614.1	72462.9	40304.6	49608	355306	555996	386433	461093	2080.09	176880	22708.9	170866
N-Ac-Asp-Glu-Val-Asp-CHO	13719.2	47802.5	80984.2	438.729	103777	82573.3	251594	11560.2	421372	422964	1.20504e+06	503001	199173	303560	300959	162458
Pelargonidin 3-sophoroside	377493	197163	103803	514064	148490	274099	44530	236180	35721.8	22195.7	1347.62	33756	26001.5	9912.08	5.59133e-10	14023.4
Zeanoside C	5.59133e-10	5.59133e-10	406.887	5.59133e-10	1338.65	5.59133e-10	228.477	5.59133e-10	90294.3	53465.6	22218.3	301978	142898	175050	357105	783848
8-nonenoylglycine	70714.9	59739.8	80944.3	49329.8	63748.4	95900.5	120161	192797	363083	457472	436107	494541	270043	273656	379226	361546
Wybutoxine	181745	228818	386532	135612	148273	119417	254141	96298.8	166138	51524	420196	224638	2352.77	2016.69	13103	1863.05
Mangiferic acid	168212	225661	442507	251893	418858	479269	436307	209164	579807	375335	781755	719647	5661.71	77360	18066.5	57865.5
Thymol Sulfate	10634.1	16597.9	21190.6	1520.6	15117.8	22369.2	33757.6	1400.62	80257.4	192195	78986.4	68703.2	251069	316200	226799	493429
Adenosine 3',5'-diphosphate	357731	384997	444645	374783	441013	443341	415644	250437	544071	346815	437892	646564	73157.7	101786	119214	93235.2
N-Oleoyl Glycine	157613	415000	498501	192475	345772	353325	462547	193065	390773	328376	460189	504047	2104.24	51109.7	10742	20674.9
Guanidylic acid (guanosine monophosphate)	217431	364774	341919	91241.7	96549.3	216649	156380	130145	69725.1	87316.4	92282.2	70556.3	8210.87	33601	6913.81	12810.2
4,2',3',4'-Tetrahydroxychalcone 4'-O-(2''-O-p-coumaroyl-6''-O-acetyl)glucoside	79999.3	159165	142960	26826	359498	259502	406445	144245	393971	264502	557614	506978	25182.9	125829	78817.3	38087.1
cis-4-Decenedioic acid	10836	11412.8	11907.6	9888.48	10227.8	11006.1	13701.4	8656.79	226690	123264	130457	187037	304471	185074	388794	300386
Oxypurinol	228157	161450	272884	263807	222099	269898	328817	475993	165954	143210	222926	378410	27080.6	29681.2	46303.4	36446.9
Capsicum annuum Fluorescent chlorophyll catabolite	5.59133e-10	100.262	5564.08	5.59133e-10	5.59133e-10	5.59133e-10	370.18	5.59133e-10	102387	59745.5	179216	111592	189174	191208	807991	236090
Salsoline-1-carboxylate	399692	420261	393701	154958	309448	329142	449022	227969	356701	175801	476916	391598	25557.1	61934.3	49366.2	31298.2
Alpha-Linolenic acid	181184	220194	195312	258319	318173	393589	500049	150799	539100	550434	505157	480701	6355.31	77750.3	21124.1	33819.1
13-hydroxy-tridecanoic acid	3136.68	2930.12	2702.65	1342.45	1845.04	1116.81	1774.98	677.345	457226	70033.3	59089	89627	533295	113016	293888	298939
Hydroxychloroquine	2725.89	3252.9	2480.49	4702.88	2198.19	4689.73	2101.98	3295.18	119478	151692	27014.9	40593.2	357118	300179	202277	288254
N-Acetyl-D-fucosamine	61150.3	72008.6	90200	59475.1	108315	99509.6	123572	65102.4	211555	157732	134046	97790.6	392734	367478	304944	330323
L-Aspartic acid	110162	108753	165566	176356	31096.4	36740.3	33704	63755.9	17779.4	17501.3	30759.4	7667.14	5041.06	5417.59	5.59133e-10	3658.76
Humilixanthin	47043.1	126943	90187.5	83698.7	54960.4	101951	101202	61743.4	275984	707192	477686	489208	20979.6	139862	270236	51184.8
4-Hydroxy-5-(3',4'-dihydroxyphenyl)-valeric acid-O-glucuronide	11120.1	38784.6	7476.67	5.59133e-10	125688	141030	185106	36591.8	99366.6	102836	97019.8	100064	58963	46284	43877.5	28144.8
11-dehydro-2,3-dinor Thromboxane B2	115163	28192.7	59545	41525.2	180801	171561	279774	236086	372274	511365	788022	617116	28234.1	68054.6	78743.6	43496.6
5-Hydroxymethyl-4-methyluracil	239225	64700.6	83810.5	51809.9	377204	191494	195390	149098	262683	223759	295494	325685	279084	272053	343517	422722
(-)-trans-Carveol glucoside	5.59133e-10	586.409	5.59133e-10	381.841	5.59133e-10	2041.43	516.245	1343.41	140724	50056.6	46633.5	49094.3	279758	296721	188998	327547
12-keto tridecanoic acid	783.753	115.695	1570.8	250.132	464.107	285.085	865.606	307.268	159737	75944.1	56160.7	73183.9	320629	154263	317450	312579
PRIEURANIN ACETATE	188711	37145	154709	292291	51484.4	79050.7	37228	79814.2	45786.9	65446.3	103346	36242.7	2483.27	9419.01	9476.59	9619.89
beta-Butoxyethyl nicotinate	189696	158715	192359	191643	179156	215504	323072	214072	311432	277233	345647	324242	409041	540811	409774	416296
PI(14:1(9Z)/0:0)	108200	44819.2	20937.5	78558.2	36751.4	55628.5	40876.6	47235.4	348597	428448	266341	210939	15525.8	54960.1	23220	18918.9
4-(Glutamylamino) butanoate	7702.67	14909.5	11718.7	20128.3	7843.18	21164.1	13801.2	19422.7	110270	343198	91384.4	59605.9	327737	363552	307318	172845
1-methylhistidine	166464	223929	383003	150180	239027	295799	547672	187934	433826	549816	872148	618741	348693	387204	623713	680449
3-Oxo-3-ureidopropanoate	130861	187605	401002	193239	296268	333542	610460	221708	524743	469860	853335	857566	368955	368083	565834	360760
Stearoylcarnitine	175434	327381	358530	228961	491187	358285	394524	200425	688929	438475	405845	757080	1681.54	108915	10874.3	77452.3
L-Tryptophan	323326	346619	392895	289239	210040	260863	335218	280283	324364	227923	565052	448281	97597.2	172924	145786	126968
Biopterin	37736.3	22251.7	47590.2	43218.4	86025.5	50853.8	142639	80434.6	221245	203666	316326	297356	292938	199659	673326	220430
15-hydroxy-9Z,12Z-Octadecadienoic acid	38258.6	51125.6	36482	29014.2	143378	108524	144776	84451.4	70567.4	64286.6	66281.4	75366.4	72497.8	42124.5	41791.8	21488
4-Hydroxybenzenesulfonic acid	78982.8	301193	354961	167718	172093	298153	510771	330075	171405	129054	234204	610287	2593.61	13249.2	9000	13382.7
4,5-Dihydroorotic acid	43247	47629.7	2787.94	36179.7	29604.4	29811	22827.8	57366.3	241480	265242	300621	354827	168977	415858	302725	176860
Acetylagmatine	5.59133e-10	1171.82	5.59133e-10	2064.09	5.59133e-10	1957.1	1240.65	1930.73	62205.6	33649.7	2797.65	67682.9	242898	254512	192101	350933
Uridine	508202	151130	189485	222754	197258	147136	186474	143591	105012	97693.7	138232	106793	443912	721818	240644	556827
4'-Hydroxyflurbiprofen	260269	289040	351587	257933	237315	267619	267281	227933	259269	198312	285787	244423	35617	79108	48369	22783
3-Methylhippuric acid	7550.5	9581.7	11521.2	6785.72	7414.09	7654.63	14193.8	7685.92	297759	165172	479726	182446	217868	338101	205034	203864
Bacteriochlorophyllide b	67470.8	45313.8	64465.1	38423	64937.1	114428	94247.4	73429.1	328570	512552	556600	525692	75385.1	243225	96668.3	232746
Portulacaxanthin II	5.59133e-10	2150.1	5.59133e-10	2442.97	5.59133e-10	5.59133e-10	5.59133e-10	5.59133e-10	4658.62	200784	20118.2	1619.22	115220	145542	448570	579311
1-(5-Hydroxy-2-pyrimidinyl)piperazine	422884	456525	566675	350190	374030	637345	925477	556976	757896	660161	1.03663e+06	1.32092e+06	345182	373013	618860	412321
Casimiroin	143.722	141.031	1101.62	5.59133e-10	5.59133e-10	5.59133e-10	1063.76	165.706	62395.8	199311	99889.8	66306.5	231936	459857	151455	262489
5-L-Glutamyl-L-alanine	167759	168167	234579	102827	299177	325853	497354	189283	510425	558503	704292	899627	123419	277239	172693	132222
Threoninyl-Proline	3098.99	2314.59	4399.66	523.454	3134.45	1287.29	4981.94	2073.65	40665.5	105316	56924.4	96939.7	193249	152243	358085	408475
Ethyl 5-oxotetrahydro-2-furancarboxylate	431906	422730	565144	486826	582867	628011	775050	584669	709117	730115	1.00029e+06	1.13832e+06	353644	447120	459572	389497
7,2'-Dihydroxy-6,8-dimethyl-4',5'-methylenedioxyflavan	22760.6	24808.5	33460.3	29159.4	110860	121369	322690	99276	134238	145099	190511	233537	6768.03	77917.5	56950.4	26811.3
Methyloxaloacetate	211336	124058	266614	381734	211193	274518	417493	332124	60260.6	68687.2	219393	83354.9	48328.1	145943	90382	35344.1
Ononin	125897	30736.8	62939.2	40668.3	203776	189517	259906	251106	306783	343027	625836	531536	12602	38916.9	45665.9	19331.4
Lysyl-Gamma-glutamate	185590	143324	77005.1	133233	32569.4	50185.4	4616.3	63244.8	27910.3	19721.9	5.59133e-10	5.59133e-10	5.59133e-10	6710.55	5389.64	6281.88
Inosinic acid	77769.2	243301	305242	167839	177618	332353	421949	188901	190143	110359	93045.6	163079	44084.9	111100	39950.9	34981.6
Prolyl-Gamma-glutamate	348531	396542	225729	183077	240298	213528	87604.3	217128	210301	88355	178530	88184.2	57127.5	90534.6	46559.1	90239.4
6-({4,5-dihydroxy-6-methyl-2-[(3,4,5,6-tetrahydroxyoxan-2-yl)methoxy]oxan-3-yl}oxy)-3,4,5-trihydroxyoxane-2-carboxylic acid	11654.9	8158.77	1938.75	5.59133e-10	247987	109246	291829	24326.1	225815	109139	229165	431621	5.59133e-10	4688.21	5.59133e-10	5.59133e-10
1-Octen-3-yl primeveroside	277359	331569	243237	72323	54413.8	130055	3824.21	291622	85456.4	2723.35	6644.22	3924.3	1505.72	1575.29	1341.26	468.713
LysoPC(20:4(8Z,11Z,14Z,17Z))	15414.2	51714.2	95079.2	70614.4	67410.7	55065.4	156137	76653.6	195292	187660	1.00963e+06	653669	1747.26	26227.8	20384.7	102616
N-Acetylputrescine	109755	177606	137066	115856	165695	138081	125027	135607	541306	195548	200137	223835	539178	732290	300725	252192
LysoPE(0:0/20:3(11Z,14Z,17Z))	67924.7	75386.9	83410.2	50468.9	280777	149326	147115	116506	121762	101409	53761.1	184455	117.123	7121.33	267.278	12244.7
(S)-2-Hydroxyglutarate	108347	114719	134974	109512	256864	187108	246956	225146	508754	531301	568963	727908	272326	292538	374330	153761
Bis(glycerophospho)-glycerol	71092.5	315940	63172.1	81025.1	98845.6	215893	137043	75133.9	246430	171952	562777	184817	490179	404780	633792	213778
Ipconazole	1746.35	3746.54	2625.39	3258.8	1435.43	2779.55	1998.15	2895.17	77876.3	85763.7	21098.3	33234.6	273516	240205	207538	266194
Undecanedioic acid	3331.96	4217.79	3036.68	21015.3	985.425	2503	1970.96	19211.2	236873	161854	61935.6	89842.8	361116	192669	194044	236232
Glutaminylproline	231530	208807	103071	237655	65218.9	84450.4	25940.1	177620	32171.9	24105.3	8646.1	32478.9	28759	41634.3	11115.6	63944.7
5'-(3',4'-dihydroxyphenyl)-gamma-valerolactone glucuronide	37634.2	73652	41314.8	47786.9	60414.4	93634.1	262196	89665.4	171331	271639	238117	337028	217261	356831	355697	255364
Carbocysteine sulfoxide	26787.3	62679.1	1510.77	27004.9	12771.2	66622.7	661.553	26594.1	210325	44204.9	14843.9	72360.9	484000	594593	59657	224968
3-iodo-octadecanoic acid	2566.74	9038.79	4492.91	1892.9	3150.14	12835.6	5497.79	1472.9	94822.1	131424	22690.4	26854.9	409551	509816	84081.4	186894
p-[N-Propyl-N-(2-carboxyethyl)sulfamoyl]benzoic acid	5.59133e-10	1927.75	2902.54	575.799	5.59133e-10	5.59133e-10	1486.76	5.59133e-10	8025.19	28742.9	2359.04	854.179	207230	438660	105164	274496
Histidinal	433438	479525	639972	365304	374074	671720	911822	558846	827482	703088	1.02683e+06	1.39402e+06	375205	359641	730563	437896
PC(19:1(9Z)/0:0)	34607.5	103491	42087.8	18144.7	78693.6	74323.1	45875	37220.6	341607	368423	375665	607921	5.59133e-10	52549.2	2513.68	91326.4
Calystegine C1	309100	315374	296873	131410	253097	341418	338057	187368	204399	148789	282517	358337	10456.1	28310.4	15260.9	8616.51
(R)-(Homo)3-citrate	160037	203239	316464	217148	262205	282234	404012	267876	227374	103937	328745	327153	36436.6	27513.2	46153.3	66829.9
3-(3'-Methylthio)propylmalic acid	360190	366381	500022	447389	504169	552449	746740	523036	623541	642690	911416	1.10946e+06	310636	414327	426248	348970
Ofloxacin	188612	221414	246662	119683	201193	247832	386082	169114	159379	130692	77967.4	26594.6	59364.7	19412	68717.3	16404.5
PS(20:2(11Z,14Z)/0:0)	125001	183145	207975	134507	254392	278955	300096	181097	466987	511461	703178	904824	27483.4	241013	105738	230930
L-Dopaquinone	397.756	4270.75	3898.74	863.433	733.73	1287.74	2485.37	487.315	46654.2	194814	103299	35073	177334	141361	483900	299504
Prolyl-Aspartate	10426.7	7422.7	5.59133e-10	1712.51	52182.6	48516.8	12864.2	20818.1	167312	102083	100327	151927	347891	332771	157686	199761
9-peroxy-5Z,7E,11Z,14Z-eicosatetraenoate	341.305	1565.72	478.354	106.508	5.59133e-10	1463.52	140.98	103.44	58581.8	115456	32867.7	5852.98	258152	683037	234683	57518.3
N-Hydroxy-L-tryptophan	112804	40940.1	63644.9	37919	196571	140246	229564	174095	215667	260523	493258	302505	250920	230949	203020	324824
15-keto-PGE1	1221.37	4843.56	310.239	111.037	343.803	1311.18	349.671	5.59133e-10	61089.3	198585	99063.7	6883.06	293033	541576	236699	82644.4
2-Methylhippuric acid	11785.8	16275.1	17168	14267.8	11943	16799.1	19030.5	15818	172823	215942	226701	251554	157593	267695	231954	225100
Kurilensoside F	104138	79114.4	56509.5	102303	8435.85	10622.2	2186.02	13182.2	7261.74	8279.71	21996.3	2766.39	68.4406	1618.59	79.2386	5.59133e-10
N-Carbamoylsarcosine	246151	262011	333262	210127	238769	239043	275770	228127	146759	99925.5	221376	133139	13938	44706.5	26209.3	29938.3
Benzyl ethyl ether	388121	388087	487242	406799	512113	524809	719555	520214	624252	667462	862989	1.03212e+06	302981	386191	394601	324926
Fructose 6-phosphate	48717.2	54235.6	81550.2	48796.4	190398	172517	256677	122546	172775	173488	263528	273819	44550.9	74088.4	58135.8	34516.2
Cytidine	14257.5	29192.9	16674.4	14907.7	31304.2	55595.8	49482.9	31266.9	68944.2	66979.9	54411.8	102183	148509	609980	186712	207604
N-Carboxyethyl-γ-aminobutyric acid	28222	68283.9	44615.2	20291.4	160369	78585.5	71600.1	44333.4	315196	136687	187355	128344	422539	422151	239383	156215
Pinocembrin 7-O-benzoate	5.59133e-10	863.205	452.772	1134.9	5.59133e-10	7.4704	133.88	5.59133e-10	28022.5	100029	9983.01	7006.47	125631	360431	275039	229522
PS(22:2(13Z,16Z)/0:0)	204604	288909	356393	302522	460099	389176	472235	261879	371089	326583	515879	546958	41886.3	221635	87468.5	147277
2,4-Dihydroxy-7,8-dimethoxy-2H-1,4-benzoxazin-3(4H)-one 2-glucoside	5.59133e-10	597.12	6323.21	5.59133e-10	5.59133e-10	5.59133e-10	2289.82	5.59133e-10	25620.6	10006.9	28073.9	98602.6	354422	123178	230414	280159
Cis-zeatin-9-N-glucoside	84678.6	96848.5	196026	55027	21424.5	29919.8	42062.2	39551.1	160531	94897.8	337830	267551	96861.6	40120.3	171627	185997
Cholic acid glucuronide	250365	112526	16372.6	172270	35216.4	36592.3	9609.39	55502.1	6890.65	7222.62	2410.7	593.787	5.59133e-10	710.29	5.59133e-10	5.59133e-10
4a-Hydroxytetrahydrobiopterin	96596.2	106774	172435	151842	122852	204825	207495	253545	14763.2	5.59133e-10	12707.1	206609	5.59133e-10	5.59133e-10	5.59133e-10	5.59133e-10
Toluate	22424.9	24037.2	32726.2	29148.4	33872.9	34332.1	52252.2	33387.6	53940.6	95405	95945.9	96008.1	71313.2	180821	361848	671671
Perilla sugar	355221	385264	495671	463666	506006	542638	727401	536879	575326	648394	898351	1.03723e+06	304051	373580	422938	341263
1,7-Dimethylguanosine	78536.1	62457.9	128698	3064.12	117748	172329	495638	11324.7	725954	531983	1.06633e+06	148717	158836	260555	251395	117479
OHHdiA-PE	276639	305089	313350	275985	389745	349812	437085	327133	422108	333011	567198	599346	19641.6	158795	80669.9	138327
Asparaginyl-Lysine	15501.5	55347.3	15456.8	12489.7	17253.4	39383.3	14395.5	35846.7	229322	309108	54863.4	42919.8	262115	204727	280869	190118
dimethyl (R)-pyrrolidine-1,2-dicarboxylate	38913.3	33286.2	33093.5	54697	48597.4	52580.5	58308.4	65959.9	93771.4	160001	104912	146125	232175	251876	217728	387986
4-Hydroxyretinoic acid	5.59133e-10	113.463	5.59133e-10	5.59133e-10	5.59133e-10	237.073	5.59133e-10	5.59133e-10	44461.7	67213.7	31331.6	7203.36	244464	406707	180936	145693
Inosine 2',3'-cyclic phosphate	163493	286471	348266	130829	114040	207634	187594	153991	180838	183895	127455	149422	18567.4	45853.9	38276.5	33577
D-Malic acid	22429.5	163977	6149.05	15755.2	9696.98	106908	9990.85	15647.9	370816	283644	274465	138236	199993	465600	327323	88935.2
3-(7-hydroxy-6-methoxy-2H-1,3-benzodioxol-5-yl)prop-2-enoic acid	38080.9	22964.1	49272	5.59133e-10	168473	97215.1	92543.1	5.59133e-10	90935	49010.1	95795.5	37909.6	167687	186881	218736	274275
PS(10:0/10:0)	138213	185519	211779	170148	306519	288030	327856	216563	456415	407749	594515	706557	1929.11	142111	29704	119290
4-Heptanone	357461	378267	472563	421362	506096	539442	680973	493967	595342	611726	841696	957459	313372	371097	391731	317542
2-hydroxymexiletine	934.309	3021.3	1024.82	678.381	1413.03	2898.51	2338.13	1564.84	107402	44606	31504.3	91056.1	167717	294104	101027	403238
C16 Sphingosine	53424.7	88053.2	142567	74415.3	60113.1	37349.5	34321.4	33696.1	210302	208052	283968	313629	362.819	45552.2	2781.54	57860.7
8-iso-PGE2	380.431	626.681	5.59133e-10	5.59133e-10	5.59133e-10	199.863	5.59133e-10	5.59133e-10	44614	132153	57731.5	5929.7	262446	421328	228576	96115.4
(Z)-3-(1-Formyl-1-propenyl)pentanedioic acid	1560.69	5081.65	4426.36	9375.44	1619.11	6481.84	6308.27	9228.66	45568	316992	140243	49678.7	171134	426537	286483	164600
Glycyl-Isoleucine	228303	161860	49963.9	150154	56330.9	50165.9	16297.3	82874.5	62600.2	26397.9	48022.4	16839.3	26461.7	72508.2	23037.6	34979.1
Glutarylcarnitine	655.295	754.838	635.984	5.59133e-10	788.188	635.078	300.857	5.59133e-10	14413.7	121337	67094.3	12370.6	203839	126997	404205	244591
Tripelennamine	201268	384550	253999	271671	308145	350859	275230	295285	547234	136101	507917	356384	22914.1	30154.9	39483.8	26069.2
PS(20:1(11Z)/0:0)	28505.8	38170	30619.5	14080.9	225087	107152	79750.6	40681.3	45855.7	42736.2	4075.75	57246.4	5.59133e-10	5.59133e-10	5.59133e-10	5.59133e-10
(1R,6R)-6-Hydroxy-2-succinylcyclohexa-2,4-diene-1-carboxylate	23891.5	56942.7	43377.8	17310.5	125212	183944	195975	48679.9	102104	154265	176215	120443	70393.7	119131	97597.6	43419.8
Dimebolin	944.893	1994.79	1576.56	2795.97	1306.25	4136.47	570.447	3771.45	105966	44636.6	35590.6	52355.5	180886	202103	213139	305666
(Z,Z)-3,6-Nonadienal	344754	378603	477382	430768	507447	518995	708896	488413	564377	606154	843280	996186	307808	380548	403835	327538
GA	123693	73838.8	45715.8	126888	7193.64	22323.7	2720.89	18605.4	4550.25	8709.73	12722.2	2274.5	195.52	610.149	5.59133e-10	808.706
PC(O-15:0/0:0)	122309	319738	232273	174868	533000	392510	327662	154744	459997	398346	280835	448760	7524.58	242160	27116.3	150692
Nonadecandioic acid	30806.5	101618	35648.3	27423.5	47343.9	52232.1	33514.8	33489	301751	345229	322818	386189	37503.9	97116.3	42448.8	147443
CDP-DG(18:2(9Z,11Z)/i-15:0)	104899	29127.5	87862.9	101234	2814.45	13947.2	482.055	11660.6	7569.04	16867.8	29874.1	1887.36	5.59133e-10	5.59133e-10	677.392	5.59133e-10
albendazole (V)	75443.9	52066.2	105797	287.708	265946	180732	304160	1356.36	479109	404032	352968	115302	155694	119250	269533	63842.8
1-(2-methoxy-6Z-hexadecenyl)-sn-glycero-3-phosphoethanolamine	26830.2	43783.7	43240.6	13814.8	30521.7	34808.5	21568.8	21991.8	321027	243587	382860	402804	17566.5	68608.5	20378	86887.4
L-NAME	5.59133e-10	5.59133e-10	5.59133e-10	5.59133e-10	70054.3	10506.5	133083	5.59133e-10	278361	403141	376361	571246	5.59133e-10	5.59133e-10	1391.64	5.59133e-10
2-amino-4-({1-[(carboxymethyl)-C-hydroxycarbonimidoyl]-2-{[2-hydroxy-3-(4-methoxyphenyl)-3-oxo-1-phenylpropyl]sulfanyl}ethyl}-C-hydroxycarbonimidoyl)butanoic acid	98115.9	81263.4	69717.5	114603	9545.88	29788.2	1509.69	25392.6	4373.52	15336.4	27588.2	5.59133e-10	5621.32	4139.64	3606.69	5.59133e-10
pentanamide	352890	320107	409570	373618	502643	500296	587133	437801	567570	566181	739728	817080	277170	316581	358965	319840
Hydroxyzileuton	10650.2	23592.6	35336.6	18012.9	89492.3	69019.7	284851	43393.8	164625	226141	432095	525398	129493	171060	375815	227645
Levofloxacin	287431	153780	90578.4	108966	305966	227309	215240	143698	137481	145743	40914.1	21636.3	83918.7	4660.26	52444.4	5285.37
Gamma-glutamyl-L-putrescine	196560	166116	78579.1	204646	63349.8	65873.3	11475.4	120266	24628.2	10639	5.59133e-10	5.59133e-10	13449.7	23264.1	9036.55	63481.3
Acrimarine J	85038.4	87001	111125	43373.5	121038	124067	84732.6	72166.5	343735	426558	489286	456087	18669.3	162221	56741.3	149706
2-(2,3,6-trihydroxy-4-methoxyphenyl)propanoic acid	355796	308397	398181	383976	467186	426551	522626	412210	513927	445641	705464	802061	168738	223686	229025	188820
(3E,5Z)-3,5-Octadien-1-ol	353501	383427	469988	411444	520486	466867	748141	451380	577226	633494	853098	1.01127e+06	328668	415268	406656	326521
Caryoptosidic acid	32580.2	6212.23	18952	8857.09	31204.4	36282.9	61870.1	55246.8	263080	267971	604665	461792	7361.72	21897.9	48235.1	13617.7
Leucomycin A6	65543	122426	44239.8	66958.7	5.59133e-10	2571.6	5.59133e-10	1497.84	5.59133e-10	5.59133e-10	2610.16	5.59133e-10	788.469	5.59133e-10	5.59133e-10	5.59133e-10
N-Acetyl-5-hydroxysulfapyridine	44217.6	60472.4	47683.1	100765	145995	123577	102235	156068	97267.8	121597	89598.2	33174.4	49360.8	64324.9	43963	20834.1
cis-(Z)-Flupenthixol	42994.3	75242	50860.9	11543.4	140918	221381	157790	56951.9	100279	104908	155122	160830	42164.3	74805.3	75067.8	33495.1
21-hydroxyallopregnanolone	79222.5	53463.3	48210.4	36242.6	51982	70034.3	58573.7	59912.5	270370	389093	348074	327701	104384	287222	117300	246015
Glaucarubol 15-O-beta-D-glucopyranoside	105978	40378.9	69035.5	162872	10274.6	18167.7	2945.24	26283.2	2575.2	12948.8	25639.2	1162.4	5.59133e-10	5.59133e-10	5.59133e-10	5.59133e-10
9,10,13-TriHOME	47494	54161.7	31122.4	34033.4	190287	123469	128259	79919.2	195587	120918	126931	174359	179175	117245	132881	155241
7-F4-NeuroP	5.59133e-10	3301.91	6244.7	5.59133e-10	0.526638	5943.92	4203.74	4842.58	9756.07	9628.49	14930.1	7375.85	256752	55252.6	265464	381710
3,4,5-trihydroxy-6-({1,8,16,17,18,21,22,23,34,39,39-undecahydroxy-2,5,13,26,31-pentaoxo-6,9,12,27,30,40-hexaoxaoctacyclo[34.3.1.0⁴,³⁸.0⁷,²⁸.0¹⁰,²⁹.0¹⁴,¹⁹.0²⁰,²⁵.0³²,³⁷]tetraconta-3,14,16,18,20,22,24,32,34,36-decaen-35-yl}oxy)oxane-2-carboxylic acid	46626.8	80227.1	77958.8	60216.4	142368	129384	183388	107136	214160	450268	482675	239919	264434	647572	254604	158812
S-Ribosyl-L-homocysteine	8214.55	13010.3	3551.94	4482.2	4462.97	23748.2	4465.11	3759.14	114021	186402	36769.7	45316.7	216399	439513	199796	138826
Lysyl-Threonine	130270	122647	60924.4	121494	28812	36901.2	5186.28	45186.7	5521.75	6558.9	7454.8	5.59133e-10	5.59133e-10	9382.6	5.59133e-10	6349.88
Guanosine 5′-diphosphate (GDP)	113069	234300	67891.4	252048	47544.8	97985.4	15753.3	130679	5.59133e-10	5.59133e-10	584.027	5.59133e-10	1715.67	16939.9	5.59133e-10	5.59133e-10
3-Methylpyrrole-2,4-dicarboxylic acid	6744.75	8333.69	5.59133e-10	5.59133e-10	215926	93601.2	243068	33658.8	227655	266862	257400	436530	5.59133e-10	5.59133e-10	5.59133e-10	5.59133e-10
Glycerophospho-N-Arachidonoyl Ethanolamine	322198	299690	312460	357304	393784	344698	354900	310253	338609	308218	467058	547066	17268.8	175104	76590.6	156749
Hydroxypropionic acid	131991	160591	120956	128717	201397	233652	146393	176293	104713	88680.2	101306	107972	5555.4	11050.4	19450.7	7163.77
Propyl 1-(propylsulfinyl)propyl disulfide	418445	383341	443744	422971	469111	478057	510826	406868	533521	469158	666634	681958	192528	239005	256705	212201
DEOXYSAPPANONE B 7,3'-DIMETHYL ETHER	13784.8	18607	24581.3	22827.4	83679.4	100726	278494	77380.8	117888	131961	180689	182867	3346.9	58817.2	62668.8	20697.4
Octanal	323035	340108	425300	400207	469814	480212	636993	451830	535642	549279	763870	916603	282949	336815	355043	292024
Triacsin C	18601.9	6125.53	1513.97	9448.53	9628.54	5448.81	4862.71	12107.4	104026	42301.1	37949	101674	157493	231290	190205	281978
Megaphone	5.59133e-10	5.59133e-10	5.59133e-10	5.59133e-10	5.59133e-10	5.59133e-10	5.59133e-10	5.59133e-10	9566.83	11673.9	5.59133e-10	3917.84	231901	329641	77353.4	221659
S-Adenosylhomocysteine	178938	188951	240496	160404	48266.3	144786	244653	147805	113910	57341.4	169124	234205	5.59133e-10	5.59133e-10	5.59133e-10	5.59133e-10
alpha-Carboxy-delta-decalactone	2687.1	10818.1	4185.2	12470.6	986.185	9761.91	2265.86	11686	103270	209576	60304	52055.2	258047	300938	121798	203700
CAY10554	270637	293394	367540	335998	415781	438610	551272	410512	480013	492796	688554	772099	231326	290780	308246	270387
3-hydroxy-dodecanedioic acid	168.346	750.666	543.264	0.190131	0.680228	264.291	256.664	0.170936	61655.9	105513	57127.8	62718.3	224630	214631	156287	206291
Zindoxifene	522.667	503.715	175.805	5.59133e-10	5.59133e-10	5.47703	5.59133e-10	5.59133e-10	39182.8	29615.5	138471	70970.1	104330	54803.3	660793	286114
1-Isothiocyanato-8-(methylthio)octane	18848.2	21687.7	21247.5	17712.8	21697	25213.9	36457.2	20240.6	93438.6	137438	70140.7	96545.1	238110	531565	111007	183641
Eugenitol	11271.3	21487.9	19699.4	20279.1	6975.55	10299.3	25454.4	16132.8	160966	104944	75420.6	86459.6	195688	164679	279687	233040
Steryl sulfate	643.389	1044.51	419.59	5.59133e-10	5.59133e-10	1148.31	5.59133e-10	5.59133e-10	74387.5	65761.7	20705.7	10163.1	330254	267021	171604	111901
2,3-Diphenyl-3-(2-pyridinyl)acrylonitrile	5.59133e-10	941.41	124.636	153.412	46829.3	64125.6	95875.7	30598.6	6904.14	2361.66	6238.42	5640.4	1253.06	1015.26	507.806	1497.22
Pentasine	303656	265647	365613	303291	381127	375449	410965	356888	326132	258462	438219	517773	77759.6	160011	177008	146078
(9R,13R)-1a,1b-dihomo-jasmonic acid	5609.98	6544.64	9259.52	6562.55	10073	9731.14	13071.6	8227.12	101564	94711.1	47676.8	64154.3	248817	170631	216410	192445
Stearyl monoglyceridyl citrate	59343.5	78477.3	76432.4	50143	67098.2	108552	60897.8	37694	383666	228301	374579	395951	443.449	30048.5	4698.3	41370.7
7-Aminomethyl-7-carbaguanine	21456.1	23952.7	25248.1	94488.2	41334.5	52233.3	66895.3	155188	156918	107322	159126	175966	213210	209888	260119	259674
(1S,2R,4R,8S)-p-Menthane-2,8,9-triol 9-glucoside	92301.9	107324	28745.1	63031.7	5863.89	5275.12	693.292	6521.45	15671	13840.3	26572.3	4986.02	6917.05	16655.6	1839.32	16770.2
3-(6-hydroxy-7-methoxy-2H-1,3-benzodioxol-5-yl)prop-2-enal	122.363	666.195	1239.65	518.015	738.901	357.241	2461.82	610.673	166922	103445	77209.2	55485.9	238212	103625	312638	157292
Lysyl-Asparagine	11727.2	58046.8	22556.6	20574.6	9980.85	33283.5	24013.4	47740.5	208162	222164	56522.2	59446.9	214321	195722	231191	226246
6-Methoxy-2-naphthylacetic acid	353627	109728	263027	118927	251416	249075	310551	73136.2	41501.2	28524.9	86512.5	12542.8	78811.2	130456	6359.33	2719.3
(ent-2alpha,3beta,15beta)-16-Kaurene-2,3,15-triol	5.59133e-10	262.249	5.59133e-10	5.59133e-10	5.59133e-10	408.734	202.161	123.57	42127.3	201030	45977.7	5143.66	204392	538142	208258	76454
3-Hydroxyanthranilic acid	5908.45	9260.32	8587.08	24204	8403.26	21160.9	31364.4	21766.5	83450.4	92614	70610.6	175133	118943	175880	209909	439929
Polyethylene, oxidized	7059.09	8101.19	6307.02	5436.33	7111.78	7132.73	7610.99	6097.7	129337	353729	38157.8	55501.8	273010	274919	129372	163399
Isofenphos	39760.4	45597.9	42581.6	20472.7	72195.7	96911.6	97255.8	62888	113417	59843.1	91514.6	108477	210843	189221	180635	255065
Ascorbalamic acid	17395.1	30207.8	7667.44	72473.4	14254.2	27536	11634.3	120159	81521.6	306975	43148.8	86822.5	321247	380407	158875	171080
Ceanothine D	5.59133e-10	5.59133e-10	5.59133e-10	5.59133e-10	5.59133e-10	5.59133e-10	5.59133e-10	5.59133e-10	44230.8	23977.6	30302	5119.72	266075	111040	478665	69857.4
Lysinoalanine	152151	158652	58890	101628	39789.1	50966.7	9619.58	50984.4	13991.6	1779.96	5.59133e-10	5.59133e-10	5.59133e-10	7678.36	5.59133e-10	1297.4
Dinocton 6	162931	235510	335905	231564	191686	232130	286960	289539	86323.6	46560.9	150538	514445	5921.11	5105.01	24761	19832.4
5-trans Prostaglandin D2	5.59133e-10	652.062	5.59133e-10	5.59133e-10	5.59133e-10	459.061	5.59133e-10	5.59133e-10	40651	102569	53108.5	8619.05	210611	371799	191157	102623
PC(0:0/14:0)	33036.8	68288.3	64179.6	37354.3	100594	75657.6	80903.3	59715.8	334029	301904	369322	451912	4137.53	25974.7	7870.22	23482.7
Lumichrome	75505.7	19290.5	43407.3	22251.8	156955	122974	238593	168008	230350	283690	573043	369146	8664.74	24690.7	27193.8	18260.3
KAPA	26747	36296.8	17087.9	22526.7	67247.4	79350.6	60983.7	33194.1	105731	138981	87092.7	163843	240333	499921	157964	139526
2-Amino-4-oxo-6-(1,2,3-Trihydroxypropyl)-diquinoid-7,8-dihydroxypterin	45313.5	77471.7	53944.1	7740.46	319498	185594	169633	75385.5	383600	218374	630448	470345	84466	94438.1	117041	56319
Oxatomide	1082.87	3605.43	826.373	3497.89	5.59133e-10	5.59133e-10	5.59133e-10	467.937	36776.7	59269.5	8313	7820.2	226950	285533	135803	169243
D-Tryptophan	5.59133e-10	171.819	931.388	5.59133e-10	177.129	391.307	953.287	5.59133e-10	57685.2	146292	79451.5	43294.7	166630	334286	117810	209907
2-Aminomethylpyrimidine (hydrochloride)	310744	304230	331187	289941	288585	333581	364116	292498	301285	231070	408018	360922	89668	149737	101679	86307.3
5-Hydroxy-N-formylkynurenine	29496.8	35621.4	87143	1175.31	51433	67505.3	339135	5018.24	390722	293574	630404	97039.5	248191	352623	268545	228296
Butylate	1411.65	3056.83	2632.88	810.599	942.522	4135.58	2554.91	476.541	107841	161300	35201.9	27360.2	252428	264813	169316	126457
N-Oleoyl phenylalanine	54087.8	74884.8	107455	4225.06	1067.57	1147.8	2752.22	392.071	61981.8	32171.8	71416.4	28255.2	3656.21	2914.32	8743.88	4129.5
Butenylcarnitine	6327.8	19982.2	9434.79	2355.78	2695.67	17768.6	10861.8	2708.05	202846	115163	225667	189566	162939	183950	205163	146320
PHOOA-PS	130856	131025	210818	84264.8	265965	282997	244179	182426	407874	331642	501690	603856	8349.65	112029	48299	91392.8
PKHdiA-PG	70455.2	132687	170854	239957	110509	72661.6	117141	155307	215686	222549	666709	309884	10093.8	84001.6	46778.2	98641.2
4-Hydroxymibefradil	62723.7	63976.7	54485.4	81297.6	3429.78	3406.78	943.854	3573.31	2065.95	9191.42	858.139	5.59133e-10	13565.1	12448.9	8084.4	7610.79
DIHYDROJASMONIC ACID, METHYL ESTER	1088.18	948.007	1254.96	323.667	661.056	904.575	1192.08	274.047	86137.5	94285.5	53906.4	40960.2	236063	195288	175488	155694
Histidinyl-Phenylalanine	191671	173960	84804.7	179888	66777.1	76349.6	29227.2	139400	36177.5	16961	28491.9	14562.3	16509	22895	14697.7	30841.6
7-Methylguanosine	5.59133e-10	5.59133e-10	3.33076	5.85153	5.59133e-10	5.59133e-10	1.15112	6.00919	47391.9	122244	31367.4	40432	118458	282915	128811	290410
17-hydroxy-androstan-1,3-dione	872.455	1708.83	1046.42	665.616	869.699	1820.34	1330.6	1900.74	58913.9	131976	29398.4	13893.9	217895	443891	133318	126915
5-phosphonooxy-L-lysine	109735	93134.1	110907	98352	240841	220398	236687	132782	219669	158794	191727	317513	70389.1	86356.4	77074.1	76192.6
PC(O-18:1(9E)/2:0)[U]	9022.74	19289.2	14685.2	7313.56	17721.9	21083.8	15832.2	18769.5	240211	327807	250722	237898	207.351	25791.7	5373.53	41302
Dihydro-alpha-ergocryptine mesylate	1807.69	2090.83	1671.76	2118.89	5.59133e-10	5.59133e-10	5.59133e-10	37.5252	52028.2	39509.5	111444	87363.6	120083	75878.8	366024	336644
Austalide C	82076.1	38593.5	67522.1	87490.9	2614.37	6505.31	2086.05	9882.89	3916.61	3704.77	7201.11	1942.73	5.59133e-10	5.59133e-10	5.59133e-10	5.59133e-10
3-O-(alpha-L-arabinopyranosyl-(1->6)-beta-D-glucopyranosyl) butyl 3S-hydroxybutanoate	66182	107296	51252.8	78604.6	5787.62	4353.29	9619.68	7562.15	6306.48	16752.2	2286.8	782.455	30766.8	45699.3	11495.7	19266.2
Stizolobate	75320.4	37238.9	49463.4	31691.6	86122.3	74328.4	128063	41987.2	32963	74293.7	75455.8	72993.7	171204	274511	241921	166235
4-Hydroxyvalsartan	15026.8	10590.5	8777.12	13042.6	71.3141	1812	2216.25	1048.05	122862	19063.6	37641.2	33556.4	187336	164316	333519	153951
2-hydroxyhexanoylglycine	111305	137131	206056	167776	151252	172259	301416	186625	324190	308390	479881	514669	285016	347120	406926	326893
L-Homocysteic acid	262739	263975	270334	235777	195543	247812	265743	249216	216034	156247	284373	249728	52287.3	85953.5	69188.2	51638
Aragusteroketal	55018.7	110924	220419	53346.3	29236.9	43733.1	93050.4	17129.7	44708.4	11044.9	41255.5	54521.5	5.59133e-10	672.933	5.59133e-10	5.59133e-10
Porphobilinogen	13393.6	42209.4	12927.6	12708.3	10151.8	30704.8	15136.8	11944.2	74321.3	74982.7	54417.1	71763.5	173887	200787	168485	296919
Musaroside	94768.8	77969.1	47698	53795.5	4807.45	7045.23	4521.99	9965.44	7372.08	6014.16	21484.6	5.59133e-10	5.59133e-10	1427.51	5.59133e-10	5.59133e-10
CGS 7181	244422	250194	350244	307275	360957	405696	539574	368463	472254	480301	658061	810408	236560	278562	303730	245407
2-{[hydroxy(6-hydroxy-7-methoxy-2H-1,3-benzodioxol-5-yl)methylidene]amino}acetic acid	728.812	2089.49	549.505	3880.45	29265.6	10254.1	93815.2	2819.47	222002	311790	326233	514137	4028.82	1162.63	7552.5	7679.58
N-(3-oxo-octanoyl)-homoserine lactone	882.638	1773.89	554.794	1016.2	1081.07	1815.38	1834.23	1252.54	76863.5	37452.4	13129.6	92234	118733	293578	47066.8	385747
dolichodial	14009.9	14206.6	20352.7	16780.6	22074	22009.7	30147.5	19797.1	113537	111000	78445.8	98273.6	232624	202155	185008	178721
Medicanine	67084	69471.9	75499.6	100232	99173.7	98697.2	109508	121058	168567	156259	180421	355914	232393	219562	232274	476587
3,4-Dimethyl-5-pentyl-2-furanpropanoic acid	5571.38	4987.03	7501.96	5908.24	9326.58	8797.73	11895.8	5847.63	101796	63356.6	53537.4	75549.7	230527	120039	218217	207523
(±)-Glycerol 1-monophosphate K salt (1:2)	197669	136460	109942	92335.9	321319	261547	117862	125103	256273	208437	134374	131483	26669	24927.4	12223.4	20170.9
1H-Indole-3-carboxaldehyde	447665	485264	536391	409593	413129	459355	616357	463580	608028	415839	886635	781870	252124	383519	338880	282978
Glycolic acid	217946	193496	172714	199775	147782	197654	124924	252746	77308.1	69133.3	110155	147714	7679.3	7717.98	13922	8285.15
Adenosine monophosphate	125461	204356	161031	89598.2	66791.1	113350	55232.7	89041.4	52087.1	64565.6	34781.5	59790.1	2834.06	1889.36	11243.2	3679.49
L-Iditol	276361	191024	201844	245463	189268	132503	194003	185961	89334.3	52647.3	112909	137304	45788.8	54016.7	62264.2	63953.1
OHHdiA-PA	52246	72611.9	114332	34057.1	91554.2	123730	77415.8	77488.2	203317	284860	256240	1.02619e+06	2728.65	43384.7	7594.41	46334.1
(+)-3-hydroxy pelargonic acid	2820.17	2184.7	3163.71	6154.7	945.848	1381.17	1596.36	5210.51	182207	29658.8	67822.6	74091.4	301968	90995	211319	193441
Ranunculin	18999	46104.8	28744.8	2547.72	104969	143614	162074	31817	90351.4	127266	141622	94847.9	55071.1	101641	77913.5	32671.4
O-Phosphohomoserine	217383	190442	219433	182027	282845	321447	300843	193629	233792	208550	333133	252869	71641.3	77630.5	90404.7	90380.1
1,4-Ipomeadiol	3895.92	6993.27	4611.45	10823.4	3397.48	6239.69	4327.57	9856.5	119168	174601	55790.2	70927.1	203643	203103	123205	202713
Desmethylnizatidine	95322.9	41658.5	47364.9	149084	191304	136950	304291	251517	294781	213805	849912	524670	48984.2	52639.5	245748	95168.3
Guanosine triphosphate adenosine	96.6011	250.75	39.9852	5.59133e-10	205.858	2306.18	5.59133e-10	15.2786	5737.34	4380.57	12910.7	45163.5	247422	154064	236731	100118
N-Gluconyl ethanolamine	217508	301911	199430	173294	235838	226249	472230	160784	231390	164025	643280	332928	16975.2	75186.5	37040.2	18437.6
Methylsuccinic acid	58284.1	59789.9	56597.8	59135.9	53967.7	71925.3	78969.4	60818.8	130905	209064	143198	189687	179804	328329	217549	243552
MG(18:1(11E)/0:0/0:0)[rac]	221259	296516	183605	141324	203536	181320	142850	128485	367023	386126	479809	356249	26930.8	338730	68722.4	364849
3R-hydroxy-eicosanoic acid	248411	365846	32706.1	233908	132080	216521	77225.4	93683.5	89114.1	90873.9	68011.4	15010.7	32413.2	96009.1	43324.2	9071.85
Lucidenic acid K	5.59133e-10	1697.85	422.178	5.59133e-10	36393.5	123648	8238.08	64488	8982.14	5.59133e-10	7916.37	5.59133e-10	5.59133e-10	5.59133e-10	5.59133e-10	5.59133e-10
PC(17:2(9Z,12Z)/0:0)	28416.2	21138.8	52481.9	9879.09	50028.5	79903.7	58297.9	38120.3	275752	242807	409541	475439	8829.58	90049.6	28342.7	78792
5-hydroxyhexanoylglycine	4237.76	10894.7	7718.66	5146.47	4228.7	10348.5	8465.2	4504.06	85183.7	201893	86820	47623.4	176258	301443	161144	148055
4-thiodimethylarsenobutanoic acid	41688.9	213501	212386	83796	65827.2	123689	219464	96733.7	428524	333422	268124	417780	122001	53381.4	98446.3	101637
(-)-Epinephrine	20708	14000.1	28749.3	23877.7	69601.5	40413.3	160770	35976.9	201435	400818	364581	552593	13745.5	18761.9	34038.4	23421.7
Chrysoeriol 4',7-diglucuronide	5.59133e-10	5.59133e-10	5.59133e-10	5.59133e-10	63153.7	34861.3	70877.6	30695	2206.99	3308.91	5.59133e-10	3451.6	20888.2	7984.75	50519.3	39713.5
O-palmitoylcarnitine	5.59133e-10	312.024	5.59133e-10	5.59133e-10	5.59133e-10	5.59133e-10	5.59133e-10	5.59133e-10	43207.7	10599.8	28151.9	20101.9	228554	79457.4	271724	178428
LysoPE(20:4(8Z,11Z,14Z,17Z)/0:0)	303314	284438	308992	348398	305506	331038	305170	283557	249678	181416	327696	392886	65693.8	143606	151758	117106
Narcotoline	9316.95	13466.5	21303.7	10401.4	89009.9	80161.9	188090	53303.8	72193.5	186022	71247.5	48885.1	9711.48	57147.7	46005.9	11152.5
delta13-8-IsoF	585.551	78.9316	378.985	403.981	731.618	567.952	387.97	221.283	51214.2	48792.8	14906.6	27704.8	142231	193667	198001	169376
Allodesmosine	71970.2	88268.4	69763.2	50537.7	227734	140781	116434	76683.7	108883	84693	36178.3	114178	5.59133e-10	4073.94	160.04	4654.09
1-(sn-Glycero-3-phospho)-1D-myo-inositol	85692.7	247852	151446	178047	166113	235235	202260	97441.5	307170	301034	437933	390559	265405	336671	344572	379702
8-Nonen-3-one	282746	301243	377502	350787	417430	409242	569651	380127	463412	487736	660893	807806	252480	310912	308211	256150
25-Acetyl-6,7-didehydrofevicordin F 3-[glucosyl-(1->6)-glucoside]	8036.41	4367.73	2455.18	11759.7	74188.8	60452.3	47009.6	34901.9	773.078	5.59133e-10	1840.09	852.546	2587.84	8684.23	8440.15	6062.7
OOB-PS	29979.6	62426.7	43061.2	20299	45242.2	57110.1	32624.9	38801.1	263927	223483	322012	426295	12585.2	70794.6	21107.1	81926.9
Isokanugin	314267	293910	345817	347544	351439	370681	412552	340736	374122	334910	529542	588789	127194	164554	181359	149480
OKHdiA-PE	148880	128690	234953	68625.8	247314	315621	287561	199050	373357	283699	545680	538578	56981.2	173269	111179	127292
3-Methylsuberic acid	2364.63	6462.68	3467.39	7344.78	957.407	5049.02	2282.15	5713.12	67073.1	101527	43513.7	42836.1	178850	246279	125652	175938
(9S,10E,12S,13S)-9,12,13-Trihydroxy-10-octadecenoic acid	19844.6	23776.3	6852.47	11176	130822	74510.1	34912.1	62301.2	58296.6	53065.7	28355.7	52966.2	51575.4	72407.1	37108.4	34670.2
XDP	168726	158299	187647	103681	293407	241774	302599	135120	323343	278736	459521	540493	32598.9	89318.1	77683.1	20582.8
N-lactoyl-Tyrosine	12301.7	63779.8	129930	37078.5	3827.56	8948.63	51035.2	15853.7	138475	63702.7	252729	377689	4666.21	16318.2	22045.6	35060.3
PC(5:0/5:0)	14190.9	14377.3	16845.6	11983.8	11780.5	13710.3	16668.9	11268.9	43440.8	33419	26110.5	32423.1	180232	162385	164367	241196
3-Dehydroxycarnitine	75992.8	80765.9	117289	41648.4	103905	151835	161371	114837	377646	316851	463786	497933	19246.4	130454	61490.6	135688
PE(0:0/20:5(5Z,8Z,11Z,14Z,17Z))	185428	225665	218008	153718	228173	271482	237445	171244	375344	341230	505138	506074	11669.3	138383	52800.2	121039
Actinodaphnine	5.59133e-10	5.59133e-10	5.59133e-10	3231.21	9525.6	5.59133e-10	5.59133e-10	5.59133e-10	146460	106204	125242	123679	175252	221635	114072	140791
2-Pyrroloylglycine	254391	250859	325989	301866	369352	378796	490448	362566	420747	435106	603480	674002	219618	267225	284714	228061
2E,4E,8E,10E-Dodecatetraenedioic acid	2448.78	14192.4	5985.82	5627.57	1531.68	12203.9	4074.6	6626.23	107032	105834	83388.4	97425.6	173211	48834.5	250073	329923
2-linoleoyl-sn-glycerol	72147.8	59681.5	89685.2	34362.3	95670.8	60560.6	88217.7	39833.5	282809	249707	309776	526837	20321.1	67478.2	20661.4	85357.8
Gibberellin A37 glucosyl ester	77825.5	39865.6	66273.9	135940	17111.5	10284.5	12081.8	23925.7	11264.9	7099.17	11214.7	11931.3	497.828	5.59133e-10	1416.28	508.247
4-Hydroxy-4-(3-pyridyl)-butanoic acid	5640.96	7730.87	11758.4	9130.66	7332.16	6812.88	15666.7	9232.78	17188.7	22153.1	51528.7	35289.9	303828	85399.1	216473	168955
Hydroxyphenylacetylglycine	2264.52	11420.4	6717.81	6001.89	3008.13	4082.38	10189	6817.05	140284	181598	92789	131380	97964.8	145640	118271	423059
PtdIns-(1,2-dioctanoyl) (sodium salt)	68534.6	44459.8	43393.8	47293.1	29288.6	54460.4	40636.7	28326.9	209459	326477	349011	189496	50189.3	196707	85991.1	104826
18:1(14E)	60007.5	69553.7	62196.1	33752.3	144839	81912.7	71799.8	32503.4	291231	360401	337897	473185	16821.9	252961	48508.5	237168
21-hydroxy-heneicosanoic acid	261560	154532	73479.3	288381	226119	201697	102762	194031	120155	201322	24643.7	16870.8	61931.5	39012.9	11346.4	22331.1
Flupenthixol	12691.7	47241	15934.6	1576.83	129496	148705	158050	12361.4	101576	192652	146746	134864	64995.9	64075.8	91097.9	70391.3
CYCLOLEUCINE	351961	209000	336606	262930	494593	310736	524712	344067	442422	409371	639237	745608	217111	237536	320960	363567
PE(17:1(9Z)/0:0)	20795.2	94986.9	28140	22869.3	72457.2	54405.1	24760.2	47584.3	199858	273833	356992	364391	1905.76	23643.8	5959.81	47802.2
hexadecanedioic acid mono-L-carnitine ester	2729.27	2640.83	248.828	2071.28	766.536	1061.21	586.02	306.661	38711.2	149110	11799.5	5.59133e-10	225253	216956	136464	150453
Galegine	51519.2	30183.3	57677.1	79606.6	85337.8	41329.1	70481	78271.9	193020	63239.7	155391	160383	144940	267819	268238	262153
2-(4-Allyl-2,6-dimethoxyphenoxy)-1-(3,4,5-trimethoxyphenyl)-1-propanol	5.59133e-10	2049.97	270.454	465.959	535.666	1165.14	711.37	1349.88	223616	113870	70180	59866.7	188484	158202	119416	168594
Homomethionine	156022	150624	228230	200928	157837	157282	134334	218127	40342.2	22539.3	82757.9	211295	1748.89	3593.3	1533.1	1656.03
Desethyleneciprofloxacin	5.59133e-10	1342.27	773.53	301.33	381.524	1432.51	218.101	1987.87	758.516	1064.66	28218.6	1469.19	13728.7	35102.5	393242	498778
Drostanolone	46134.8	141311	258489	27501.8	51457.4	88393.4	89974.9	31756.1	139204	120184	130952	126450	6722.87	20615.9	13713.3	4231.56
Methyl N-(a-methylbutyryl)glycine	64553	83387.2	74022.3	86919.4	89612.2	115653	116328	99891.9	142781	164198	180397	230385	205663	246670	248437	264247
3-Oxoadipic acid	79910.4	153987	60299.8	93225.6	73788.4	99936	92882.2	112425	148453	211444	294470	313212	201446	217762	210987	389936
Precursor Z	132774	203761	259614	46014.7	34286.9	132601	152513	75243.6	72606.4	90474.2	89846.4	46599.4	12218	46783.5	13849.5	29428
Ochotensine	2867.82	2846.58	3024.39	1406.04	653.779	605.499	5.59133e-10	1665.31	44846.7	22645.2	69673.5	74852.2	85154.7	142885	365137	169080
Unshuoside A	397.779	543.42	1442.85	250.108	414.058	2536.06	933.958	671.31	189501	33231.8	67133.7	104892	142120	67402.6	244249	305599
O-malonyl-L-carnitine	9812.64	16174.6	8145.37	9898.51	11637.4	22911	18848	11413.6	72680.1	40885.6	36049.9	57375.1	167163	217868	126349	195535
3-Oxo-carbofuran	18323.6	51733.5	215489	40173.3	15762.3	6418.81	126935	16544.3	100542	128194	267725	263772	10425.9	19481.7	32170.3	24468.8
Taraxacolide 1-O-b-D-glucopyranoside	66035.7	99245.3	43767.4	135394	14746.2	24824	28785.5	23764.3	6155.06	17350.2	10634.9	17781.2	1769.41	3320.64	3993.31	3230.89
Sodium 3-ethyl-7-isopropyl-1-azulenesulfonate	53373.5	140173	43593.3	55747.2	56952.7	54668	49707.9	57353.8	224441	75744	410452	461176	55423.4	53825.3	23838.6	23861.5
(E)-2-Tridecene-4,6,8-triyn-1-ol	287463	272513	368498	357414	378876	383375	550200	413489	387010	391216	560152	672149	243285	275524	320348	249067
(2E)-octenoylcarnitine	192.046	2372.46	5.59133e-10	1905.75	5.59133e-10	2678.09	5.59133e-10	2147.9	107635	24361.4	20308.4	33523.3	168479	179411	115002	223258
HEPTAMINOL	150189	100537	77385.4	179877	131091	97589.4	106472	156912	162836	245349	152806	142185	243611	253835	440440	310415
Boeravinone B	1755.67	666.235	7156.92	1321.21	2269.45	1438.95	2738.05	1706.81	56061.8	38264.1	5243.51	40013.7	145038	151308	145437	238900
PS(13:0/0:0)	87293.3	86282	151373	159813	34482.8	62250.4	30810.8	88742.4	12465.3	250.679	5.59133e-10	5.59133e-10	5.59133e-10	2014.82	1404.19	224.243
8-[3,7-dihydroxy-2-(4-hydroxy-3-methoxyphenyl)-3,4-dihydro-2H-1-benzopyran-4-yl]-2-(3,4-dihydroxyphenyl)-3,4-dihydro-2H-1-benzopyran-3,5,7-triol	61966.6	96033.2	81349.5	15622.1	188840	162395	227289	83712	195250	126873	280868	288451	7107.35	50237.6	36100	14246.7
PGA2	5.59133e-10	5.59133e-10	5.59133e-10	5.59133e-10	5.59133e-10	5.59133e-10	5.59133e-10	5.59133e-10	19235.2	63388.3	31595.9	941.158	200127	261429	151697	89559
1-Dehydro-9-fluoro-11-oxotestololactone	4960.38	11795.9	3967.74	3446.47	3787.34	22718.6	5291.53	2711.93	73098.1	17105.4	27703.5	27270.7	143249	267531	83507.6	223017
PE(19:0/0:0)	78096.5	120104	87241.7	50565.2	341967	112004	101132	85770.8	79555.9	127357	43618.6	131907	5.59133e-10	2935.42	5.59133e-10	4262.49
8R-hydroxy-nonanoic acid	943.247	1594.78	1966.07	243.096	375.834	853.124	553.81	340.944	67591.9	87773.3	52589.3	40701.6	191782	192392	144290	124960
PC(6:0/6:0)	63775.7	19666.5	64919.6	85793	5.59133e-10	1565.57	5.59133e-10	3057.87	1573.68	2449.79	901.485	5025.37	1285.55	5.59133e-10	9822.17	13290.9
Galactonic acid	50985.4	71734.8	57797.6	41361.6	180933	121121	208750	139427	297020	263902	279784	425506	109256	116949	178130	108040
Phenylacetylglycine	4478.56	5696.61	8974.07	6029	5542.45	6236.45	11852.8	6525.51	111694	140011	141451	177993	116949	140258	179325	165142
LysoPC(20:3(8Z,11Z,14Z))	9629.49	23102.1	61139.5	37128.6	21632.1	29297.7	33145.2	23679.6	152852	143483	368588	413803	5.59133e-10	13072.8	2690.31	35032.3
Zygadenine	5.59133e-10	5.59133e-10	5.59133e-10	5.59133e-10	5.59133e-10	5.59133e-10	5.59133e-10	5.59133e-10	80465.2	6117.87	44679.1	17344.7	199170	51810.3	366836	139778
Isoproterenol	5339.52	14039.2	5254.36	8615.81	3187.4	17472.9	6085.02	7367.47	169523	91085	39847	48282.8	146984	310806	104624	190388
cis-3-Hexenyl pyruvate	4537.62	6884.52	8834.67	35881.5	3740.63	6100.28	5559.64	30571.8	95754.1	89258.3	74154	98751.2	144993	178607	124950	229870
cis-2-Carboxycyclohexyl-acetic acid	3936.77	5114	5939.34	4262.94	5260.02	6260.07	8508.99	4968.59	116316	147239	107122	100433	141558	151447	132202	181875
N-(5-Amino-2-hydroxybenzoyl)glycine	151662	125337	234611	88714.1	176209	216383	446905	138688	249283	219863	406754	660335	87615.8	77976.3	104630	117598
Dopaquinone	189.475	1794.28	2155.72	827.691	214.084	887.329	4258.8	573.159	31478.2	108089	74525.2	29143.6	129195	98473.5	304198	188725
(S)-Oleuropeic acid	5563.09	4601.8	7758.6	6101.52	7840.56	7528.14	11256.2	6131.39	89483.3	56844.1	36769.8	58762.1	227315	189070	132483	133012
PGE1	5.59133e-10	437.097	5.59133e-10	5.59133e-10	5.59133e-10	5.59133e-10	5.59133e-10	5.59133e-10	51020.1	29119.7	48071.3	9345.62	216787	143720	273768	60723.2
Monohydroxyperhexiline	91759.1	206167	247591	107327	148423	161025	169028	85961.9	141825	123762	175518	184515	438.067	17106.7	3339.99	5767.79
Negletein 6-[rhamnosyl-(1->2)-fucoside]	3187.09	1808.87	1780.87	3625.71	0.0858039	732.795	40.017	284.715	5.59133e-10	45.9524	22827.7	5.59133e-10	3391.89	45296.2	488807	369458
Triethylene glycol diglycidyl ether	2172.5	2952.41	3409.89	3522.46	1917.71	3446.43	3189.54	3459.23	123168	64895.5	45215.9	63710.1	212415	122129	133959	182054
Mycophenolate mofetil	5.59133e-10	1337.2	5.59133e-10	5.59133e-10	5.59133e-10	567.616	5.59133e-10	5.59133e-10	11704.4	25604.3	3585.06	4505.79	127475	173666	86219.6	291866
PS(P-16:0/22:6(4Z,7Z,10Z,13Z,16Z,19Z))	904.344	15266.9	39147.4	29552.7	80197.8	59856.2	71294.7	68141.1	2546.85	5.59133e-10	5.59133e-10	5.59133e-10	15506.2	11705.9	61988	95395.8
Alpha-Aspartyl-lysine	181552	159642	123560	151913	82489.3	102311	53399.1	141193	38419	30180.9	12500.9	19952.2	17024.5	18754.7	16470.1	28697
2,8-Dihydroxyquinoline-beta-D-glucuronide	165.445	85.5394	531.762	165.21	5.59133e-10	1.99154	6285.65	319.216	37735.8	314781	219694	564257	1848.92	140994	36841.5	38071.7
N-Ac-Tyr-Val-Ala-Asp-CHO	5.59133e-10	5.59133e-10	4449.03	5.59133e-10	3275.71	5.59133e-10	13516	5.59133e-10	104719	54655.4	157061	103944	71243.4	99952.3	387476	202294
Laurencione diacetate	20998.3	27333.7	24673.1	38377.8	23321.3	34637.1	26712.4	35944.8	42202.2	206245	48451.8	80707.3	168055	205327	184764	231107
3-(4-Hydroxy-3-methoxyphenyl)-1,2-propanediol 2-O-(galloyl-glucoside)	21483.8	39718.8	31698.2	2188.77	114157	137557	154118	29782.8	98293.6	133745	165374	138643	48384.3	88384.6	69094.1	31149.3
3,4-Dihydroxyphenyl ethanol	10246.4	12917.4	15672.4	12358.6	12398	14280	22755.8	12598.3	166455	237101	101115	118946	224961	114900	110250	109706
2-amino-4-({1-[(carboxymethyl)-C-hydroxycarbonimidoyl]-2-[(1-hydroxy-2,4-diphenylbutan-2-yl)sulfanyl]ethyl}-C-hydroxycarbonimidoyl)butanoic acid	71289.1	93043.2	91878.1	61981.3	95672.7	115742	94565.6	71821.3	250545	297546	370037	350905	3330.6	74012.1	19509.6	54836.4
PG(12:0/20:5(5Z,8Z,11Z,14Z,17Z))	11.0909	10738.3	13236.2	6627.34	69740.4	58352.1	104607	45145	79635.1	29785.9	61928.4	9076.81	3064.24	15941.7	1550.07	5.59133e-10
Pranlukast	5.59133e-10	5.59133e-10	5.59133e-10	63.8205	5.59133e-10	5.59133e-10	468.548	5.59133e-10	53954.9	14137.1	27757.1	14237.5	85611.5	201397	207993	150039
METERGOLINE	2170.85	2622.8	3078.81	3977.25	1241.13	1396.64	647.987	1291.08	66909	32651.8	64649.6	30968.1	176636	142647	201544	112805
5-Androstene-3b,16a,17a-triol	5.59133e-10	965.412	5.59133e-10	5.59133e-10	5.59133e-10	263.038	319.518	5.59133e-10	38672.3	146530	73869.9	4423.86	197246	329768	168770	50956.8
Acaciabiuronic acid	2383.28	5190.96	25051.3	5870.95	7707.68	5040.38	31139.2	12201.4	53113.6	44121.8	55535.5	77961.4	137010	75147.8	216596	328630
(ent-6alpha,7alpha,16alphaH)-6,7,17-Trihydroxy-19-kauranoic acid	5.59133e-10	536.534	5.59133e-10	5.59133e-10	5.59133e-10	117.607	5.59133e-10	5.59133e-10	31806.8	68820.5	45233.6	9069.28	122531	444769	114236	94856.1
Goshonoside F2	5.59133e-10	5.59133e-10	5.59133e-10	5.59133e-10	5.59133e-10	5.59133e-10	5.59133e-10	19.1605	47856.3	8129.8	55533.6	1328.6	114741	297125	303764	21888.6
Piperidine	25411.1	69619.5	28525.1	39581.2	119974	121390	73674.9	68811.3	58893.9	80654	77639	36287.4	39803.6	50866.8	55924.7	39194.9
Lysyl-Isoleucine	125690	63261	27419.8	74750.1	10864.9	8889.24	2025.45	17834.7	8667.23	3734.35	1511.26	2734.61	2045.03	7457.08	3150.74	27882.1
4-Oxoretinol	206.071	459.332	5.59133e-10	5.59133e-10	5.59133e-10	128.971	253.162	5.59133e-10	28125.7	38506	13336.6	3948.22	169958	351191	158471	48006.1
4-Ethylphenol	5732.38	6742.51	7470.25	6040.94	7218.7	8768.96	11028.3	6963.3	116335	143899	113098	96701.2	138430	155684	120509	172863
Leucylproline	160747	200827	125507	149216	107704	139248	96606.4	122360	146863	93257.1	149503	55583.1	172820	487425	182135	397948
6-Kestose	13506.3	5.59133e-10	81023.5	15077.7	44608.2	52829.9	161021	7450.32	276314	162225	582361	353801	37562.8	48545.6	83514.8	35151.1
LysoPE(0:0/20:5(5Z,8Z,11Z,14Z,17Z))	17538.5	74884.5	80820.2	60123	72023	66798.4	57159.8	76528	189471	202897	549822	329176	4288.26	48744.6	11938.3	71754.6
N-Acetyl-7-O-acetylneuraminic acid	56.0409	99426.8	74293.9	56891.7	614.921	136.55	5.59133e-10	5.59133e-10	27.7922	5302.56	6242.79	5.59133e-10	1058.59	5.59133e-10	3012.52	5.59133e-10
PI(19:1(9Z)/22:2(13Z,16Z))	20719.2	12561.5	15888.9	23780.4	37404.9	37179.1	69072.7	113892	2564.43	13874.4	19206.5	5.59133e-10	5.59133e-10	5.59133e-10	5.59133e-10	5.59133e-10
Betamethasone	169371	202576	134172	94831	184304	222516	72840.7	129276	45973.6	12712.1	16648.2	3336.96	3517.58	2698.38	1340.76	4551.1
Sarmentosin	21125.6	14624.4	18256.5	25609.2	34307.1	21782	25803.7	25964.2	163991	41743	72887.9	172249	201584	111581	227094	201247
1-Isothiocyanato-2-(methylthio)ethane	61063.3	137024	52742.7	83304	51282	90747.7	162603	79598.3	282770	320024	444780	323263	98940.1	201296	133811	102316
Lincomycin	664.137	3821.34	358.465	5.59133e-10	674.62	9100.77	2150.64	5.59133e-10	83525	16084.7	5858.52	9342.88	188489	182545	95234.2	180940
PS(18:3(9Z,12Z,15Z)/0:0)	124417	58236	48148.7	28721.5	36206.6	43129.5	28901.8	47079.5	122543	176311	194002	151897	89018.6	311193	102567	287462
(±)-2-Propylthiazolidine	232535	249500	342584	286245	332611	366131	480643	335519	392490	428828	604493	647261	203467	264888	271265	211943
Glycinoeclepin B	40744.6	71405.7	17700.1	150352	485.75	8260.3	632.176	5897.92	5147.45	2466.03	1312.07	3081.67	6579.8	695.59	12308.2	9694.11
Axisothiocyanate 3	56672.8	90559.3	61394	84580.1	118348	133755	82734.8	109467	29704.9	38071.8	19177.5	7510.41	5159.29	7480.08	1759.32	16058.6
Fucα1-2Galβ1-3GlcNAcβ-Sp	5.59133e-10	13469.4	5125.35	5.59133e-10	139651	100037	136034	5.59133e-10	119141	157706	187901	148927	58411.8	70840.5	145948	28408.8
Galactopinitol A	103998	146376	233134	165496	102083	88531.8	175388	154991	21794.8	21392.5	85573.7	127055	10877.8	3294.65	10726.5	21371.5
3,4,5-trihydroxy-6-[4-hydroxy-5-(methoxymethyl)-2-(3,5,7-trihydroxy-3,4-dihydro-2H-1-benzopyran-2-yl)phenoxy]oxane-2-carboxylic acid	1665.03	42590.4	15202	2884.13	32549.7	126215	89923.3	29016.7	13207	15986.3	11785.1	18073.4	9765.73	12117.6	8977.66	11935.8
Dihydrolipoate	79505.6	74355.2	70868.5	125629	169587	149313	117840	167253	110261	137676	138655	277007	213461	209242	155883	187022
PC(O-18:1(9E)/0:0)[S]	44250.3	116357	46668.8	45415.1	112131	115420	36281.5	57246.4	489206	211421	92904.7	145274	1129.29	37202.5	7962.72	39262
Cotinine	151347	76617	30703.2	99250.1	27653.8	21543.4	9005.02	39308.7	26319.8	8897.85	19069	9006.7	12000.3	30737.6	10494.9	26643.7
N-Hydroxy-L-tyrosine	4016.4	85107.3	77378.9	50454.5	8876.6	4202.38	15447.6	2058.43	31815.6	49495.9	53980.6	85392.7	2286.15	16364.6	8627.54	11754.7
Thiourocanic acid	294386	199867	306738	287378	435062	310500	402300	348088	398819	319759	513621	579055	207606	270841	232360	212427
4-(Methylnitrosamino)-1-(3-pyridyl)-1-butanol glucuronide	235345	209511	276816	146810	200942	199499	242448	145422	272703	179966	357897	382485	58645.4	70132.3	134021	115749
Epsilon-(gamma-Glutamyl)-lysine	194495	244869	97878.4	130428	123897	190968	48119.9	88990.6	33471.4	39023	15379.8	16947.4	10695.8	22090.6	6238.17	5000.08
Carbamazepine iminoquinone	152804	54589.2	50149.5	68170.6	177471	135435	177259	82776.8	98558.8	65293.6	105867	110837	24546.7	36769.5	7044.38	32824.5
Aldehydo-D-xylose	174350	178099	281709	111641	167224	122037	186157	101748	195880	99929.3	230406	129792	54549.4	31922.1	80086	82926.8
Alexine	51305.5	55139.8	152242	71330.7	107591	75439.3	153479	107375	213924	257264	291186	303398	170672	198960	201553	419857
LysoPA(0:0/18:1(9Z))	51275.7	73837.2	45204.9	29132	28550.2	37316.1	21279.3	29708.2	231740	108252	233519	268450	10369.1	21606.4	12304	22952.8
7-alpha-D-Ribosyladenine 5'-phosphate	70918.2	172784	167624	55558.1	48977.2	92713.5	90499.4	57012.2	105503	120535	69270.5	132123	3064.54	9268.72	19272.3	6151.84
Ilicifolinoside A	2705.83	319.394	559.86	3116.02	5.59133e-10	469.472	184.515	1582.38	101040	14695.8	42607.1	64725.5	211231	8743.31	291036	189301
Isoleucyl-Glycine	168627	72360.2	26431.1	105031	32246.9	22080.7	6928.9	42788.9	26518	8251.09	19959.8	6677.25	10939	34993	10940.1	19765.6
Methyprylon	1328.73	4070.48	1980.23	1277.66	1674.62	2922.41	2509.93	1763.4	67519	45879.7	61277.4	72231.9	111914	159694	124807	179427
alpha,beta-Didehydrotryptophan	11969.8	4903.83	1343.8	8240.53	6229.52	4832.17	3431.1	8008.61	75641.1	28643.1	32857.9	80277.9	113787	154468	139630	204361
3-O-Acetylepisamarcandin	106912	108604	156142	190106	229574	203413	354675	187263	204861	238957	379973	493824	106557	135152	135377	104557
Nitrofurazone	14044.1	67164.5	5441.42	10687.3	10789.2	90024.6	11171.5	13619	187350	169495	110020	83969.6	186528	294860	212380	65337.1
2-dodecenal	143043	212542	214800	203415	312231	275663	317796	245490	259857	278511	351826	482827	139343	195754	134965	181840
5-trans-PGE2	891.009	3163.24	189.408	5.59133e-10	482.613	2160.23	231.048	95.4787	29862.8	123724	45527.7	8204.91	181872	338948	127162	66765.3
Perilloside C	1778.24	682.97	1363.11	3385.48	1134.34	380.488	1885.19	7855.47	50909.6	19814.1	61368.1	154301	77290.1	61860.5	305891	265326
2,2'-(3-methylcyclohexane-1,1-diyl)diacetic acid	4977.84	5278.59	6268.8	5400.84	5655.09	5333.3	6841.91	5547.66	106039	68741.2	59897.8	99203.2	141294	93802.2	168558	200763
Gentamicin X2	225582	153247	121084	174971	185620	168052	149718	240151	96386.2	92231.2	58980.1	50180.2	95980.6	72371.1	45415	23583
PC(12:0/0:0)	10348.5	13439.4	10929.8	9118.5	16871.8	15413.3	14252.2	21614.9	220308	178578	190694	348226	54754	69136.9	40509.4	157215
Tryptophyl-Gamma-glutamate	2459.24	7573.47	3558.65	7803.27	2085.07	5863.42	4446.22	7250.35	47528.6	41443.4	49169.4	77550.3	122997	59287.3	226830	276587
Palmitic acid	374870	289866	316671	241068	426316	248082	430250	187332	448330	360371	548676	467424	179325	201004	205876	165819
15-Acetoxyscirpene-3,4-diol 4-O-a-D-glucopyranoside	92128.7	44690.1	3743.31	112542	1537.9	1136.57	5.59133e-10	10238.3	4564.46	7221.91	5.59133e-10	5.59133e-10	1220.52	811.419	4636.4	5225.28
2-Hydroxy-2,6,6-trimethylcyclohexanone	17877.9	18140.1	19431	20001.5	19994	21919.7	26589.9	19000.2	115488	87596.6	71585.6	108470	161389	146438	151351	173995
L-gamma-Glutamyl-beta-phenyl-beta-L-alanine	220914	190421	234900	192991	242049	260867	330324	235019	300331	214404	449709	414852	53087.9	137349	95277.3	67605.6
L-Serine	155005	158261	214126	174304	166353	187132	183146	185153	144032	78897.8	166465	150747	23161.3	39260.5	34525.8	24628.3
5-Carboxyamino-1-(5-phospho-D-ribosyl)imidazole	5.59133e-10	43015.1	47093.8	10712.2	5.59133e-10	44371.8	118021	47624.6	105774	152978	139496	257225	116295	186456	187160	221331
avocadenyne acetate	302.901	1234.96	641.892	5.59133e-10	5.59133e-10	309.172	259.296	5.59133e-10	39858.9	83473.4	89555.9	5308.16	182500	330738	130539	49239
11-dimethylarsinoyl-undecanoic acid	133985	123762	211192	98399.4	104228	108704	137094	91721.4	171998	116065	177212	145386	20004	29257.6	35962.1	20542.7
Mitomycin	341.097	469.07	990.015	1391.42	432.766	926.324	257.486	433.06	117557	40998.6	125722	42742.6	104144	152813	354114	71882.4
PGF1β	740.528	831.055	4161.52	1046.78	2908.62	1208.44	4876.22	329.509	36029	24299.9	6295.45	5286.33	137024	188230	222225	66117
Guanosine monophosphate	4547.67	8314.93	20268.5	2094.42	69636.6	91204.6	160591	30984	228937	248796	332231	404243	28482.4	85442.6	55603.7	30743.5
Linoleoyl glycine	85612.8	145860	265685	79599.3	141578	264416	274421	123831	197979	202715	328428	310534	4830.63	48912.5	17210	24140.8
PC(20:3(5Z,8Z,11Z)/0:0)	11049.2	18361.3	9725.45	11337	22872	34008.3	14366.1	34080.3	169113	254164	247166	279041	5576.42	55441.2	15257.9	74561.9
Malyngamide H	5.59133e-10	5.59133e-10	65.9127	5.59133e-10	5.59133e-10	9.8575	5.59133e-10	1.91477	35091.9	3814.95	24863.2	6630.95	183946	78544.7	232472	110431
trans, trans-3,5-Octadien-2-one	222251	237949	303961	286137	332032	331566	453650	315298	369258	382133	537877	639833	199497	242772	253137	211678
Leukotriene E3	42.9555	5.59133e-10	5.59133e-10	5.59133e-10	5.59133e-10	5.59133e-10	5.59133e-10	5.59133e-10	31609.2	47823.2	2340.56	8275.9	153162	223436	93651.3	127963
Sebacic acid	1030.82	858.814	3081.4	1895.4	1624.47	1844.08	5075.58	2182.2	32984.7	26982.3	48704.2	92548	111352	98848.1	135995	269675
Phosphatidylinositol-3,4,5-trisphosphate	198865	45842.7	137557	129256	208793	84655.4	227764	114295	81466.3	26114.4	38302.5	27582	61769.4	17465.1	14252.7	9959.91
3-Hydroxy-1,10-bisaboladien-9-one	222011	228866	285699	275563	309137	335171	434255	311683	332584	356969	506901	573671	186187	228020	241105	196610
Stearamide	73394.6	150028	220612	136797	277091	205629	273368	140847	287737	258163	407393	493097	22261.5	130171	43779.6	103024
N-butanoyl-lhomoserine lactone	32367.6	36178.9	24262.5	53415.1	22360.5	35526.9	20284.8	36915.8	39887.9	188284	44045.4	68678.6	145656	191924	177749	227500
5,6,7,4'-Tetrahydroxyflavanone 6,7-diglucoside	262448	135465	85978.8	406101	279921	181234	71519.5	207084	37842.5	29580.4	22740.3	41793.2	89728.5	46587.7	16481.7	104992
Stachyoside A	8681.4	2444.35	6202.6	15989	23577.1	45119.4	75242.3	110949	9532.68	20073.1	64342.5	66777.1	5.59133e-10	5.59133e-10	1042.67	53.7358
O-sebacoylcarnitine	5.59133e-10	5.59133e-10	187.534	5.59133e-10	150.658	334.59	258.896	5.59133e-10	95587.8	24551.9	4148.07	7801.53	170535	157755	92666.3	171235
2-Hydroxylamino-4,6-dinitrotoluene	63705.1	31368.5	57425.1	42212.6	102894	142406	41845.8	119977	15195.7	66278.2	5704.31	102277	30197.8	8746.27	25689.5	47621.4
L-Alanine	172316	173178	230359	143474	146251	189836	257118	141758	194408	160642	336800	425804	36589.4	66787.1	54226.4	48712.8
2-amino-4-({1-[(carboxymethyl)-C-hydroxycarbonimidoyl]-2-[(3-oxo-1-phenylpropyl)sulfanyl]ethyl}-C-hydroxycarbonimidoyl)butanoic acid	7687.3	14911.9	18515.9	14118.2	5364.22	15442.9	15420.8	7662.04	51337.7	149271	16514.4	26015.1	166634	204602	127894	149698
Butyl salicylate	206065	208073	276239	259052	287804	318325	403350	311812	325961	354540	470824	562531	166556	213756	226047	181231
9-hendecenoic acid	4540.42	5142.53	5847.89	5110.52	4740.47	5590.48	5858.19	4150.95	158863	83392.5	51574.2	86496.8	200077	85942.2	128186	141768
(3S,5R,6R,7E)-3,5,6-Trihydroxy-7-megastigmen-9-one	874.507	3094.59	2039.01	1091.53	339.658	1359.84	717.614	935.517	89494.5	246929	30060.5	32015.1	226041	200853	72448.6	94014.7
(3S,5R,6S,7E,9x)-7-Megastigmene-3,6,9-triol 9-glucoside	5700.56	10406.7	3505.51	5161.52	1649.94	2928.6	1753.24	3392.86	55003	59105.4	68748	76660.7	155780	48552.4	222357	189936
(-)-2,7-Dolabelladiene-6beta,10alpha,18-triol	88.4559	695.959	5.59133e-10	5.59133e-10	5.59133e-10	712.334	5.59133e-10	149.733	38178.7	22622.8	20011.5	18312.1	134202	212246	98873.5	122476
Ascorbyl palmitate	47687.1	44963.5	78338.2	4110.47	1331.78	473.361	1785.75	1458.12	19273.7	17946.8	19590.1	51747.6	603.311	885.176	1310.75	386.462
CAY10499	5.59133e-10	58.522	5.59133e-10	100.346	83.2291	28.0889	34.8661	5.59133e-10	19.1498	2267.17	17134.4	3787.76	3201.88	52335.6	299061	395928
Barbituric acid, 5-ethyl-5-(2-hydroxyethyl)-	6415.23	7045.37	4166.07	9633.27	7739.25	10086.7	9468.11	10774.4	85924.6	123066	36331.2	54426.7	158375	177826	164825	88180.1
LysoPE(0:0/16:0)	45248.7	135094	115843	36932.7	186771	110900	108206	55937.1	320444	431076	267658	293612	6076.95	161058	16492.7	146197
Methyl linoleate	13422.2	25581	41554.6	20712.9	19841.4	53372.6	21995.6	19743.4	194112	209619	223793	322534	268.9	98304.1	16032	71837.4
3'-HydroxyIndinavir	57511.6	56944	18365.2	55378.7	950.218	869.327	5.59133e-10	5.59133e-10	5.59133e-10	1050.97	4875.7	5.59133e-10	5.59133e-10	5.59133e-10	5.59133e-10	5.59133e-10
5'-Deoxy-5-fluorocytidine	5.59133e-10	5.59133e-10	5.59133e-10	5.59133e-10	5.59133e-10	5.59133e-10	460.02	5.59133e-10	2075.15	12809.2	45615.2	6860.01	46311.3	130914	453193	91606.4
apo-[3-methylcrotonoyl-CoA:carbon-dioxide ligase (ADP-forming)]	12069.4	16577.5	6236.93	9849.04	6598.11	14838	3529.02	9371.62	75427.2	108583	37981.2	45801.1	117229	197342	177976	110900
LY395153	113.954	966.026	87.5945	1474.19	52712.7	41552.3	29437	27531.8	8869.66	515.679	10253.8	1555.93	3063.16	3545.09	7940.67	3021.36
3,4-Methyleneazelaic acid	1087.3	3504.81	2051.53	1655.6	796.174	2129.54	2985.06	2251.55	51182.7	38616.2	56293.9	67934.2	99081.6	150026	121805	157571
Goshonoside F1	5.59133e-10	313.251	561.283	5.59133e-10	5.59133e-10	5.59133e-10	194.65	5.59133e-10	44925.2	45113.8	184353	8923.69	209381	48703.4	367617	66564.4
2-Oxo-4-methylthiobutanoic acid	133248	73281.4	99092.3	55001.6	151217	142854	262836	162586	245783	248329	703514	249281	22334.9	47811.5	33580.3	33170.4
Leukotriene E4 methyl ester	5.59133e-10	494.579	184.152	505.106	5.59133e-10	5.59133e-10	5.59133e-10	5.59133e-10	51668.3	84415.7	9176.25	16192	150656	177705	104008	126145
3-oxo-adipic acid	5389.4	3874.28	1215.52	1521.57	8342.51	3387.8	2268.78	2746.92	24898.1	113602	20430.1	8140.99	125361	165550	125380	162916
2-Hydroxytacrine glucuronide	5.59133e-10	236.635	5.59133e-10	5.59133e-10	5.59133e-10	5.59133e-10	5.59133e-10	5.59133e-10	15055.6	170713	13563.9	12887.5	189511	51166.2	136952	256117
Avocadene 1-acetate	62603.9	105204	35741.9	46209.7	36571	40427.5	39430.9	35345.5	160269	227219	180792	153108	47159.3	87479.7	51460.1	94171.1
dTDP	129422	162285	276049	115100	119299	158414	278710	137496	268224	283195	449258	548133	75243.8	72888.1	249813	234905
PA(20:0/16:1(9Z))	72461.3	43369.2	27224.7	56023.6	5087.01	3224.7	5.59133e-10	6576.68	5.59133e-10	4288.47	16299.9	5.59133e-10	5.59133e-10	5.59133e-10	5.59133e-10	5.59133e-10
5,6-Dihydroxyprostaglandin F1a	101.643	591.044	112.38	5.59133e-10	5.59133e-10	543.595	5.59133e-10	5.59133e-10	15115.5	120224	15588	5476.61	161732	371790	101026	64444.1
Glutamylmethionine	207134	151404	211518	131736	161858	159472	154780	121849	131424	49184.3	122399	73657.8	34951.7	63284.9	30176	27859.5
N-palmitoyl taurine	3121.02	2569.89	4077.22	1593.24	2566.15	2997.48	3416.88	1076.1	43905	60573.2	23787.8	15853.7	138132	148901	156095	104894
22-tricosenoic acid	81993.3	121078	155381	104183	60778.1	95496.5	71170.3	66428	81460.5	65645.9	48773.9	79051.5	9645.25	21199.6	3775.84	31632.4
FLUTRIMAZOLE	27405.5	5145.53	12711.9	8651.7	19965.8	26108.7	33316.1	40154	173041	166061	392149	266660	2998.7	12722.4	25632.8	7227.72
Scillabiose	10932.8	8952.62	12419	5.59133e-10	72804.3	100284	165159	11502.2	103559	107618	121034	177035	39296	51975.5	69532	26137.5
Lactosamine	16387.2	12612.4	20052.6	15935.5	14510.7	13379.2	16808.9	13179.8	67886.2	27554.1	61008.6	41520.3	157966	173242	175812	92500
Fluoranthene	310425	286864	279618	258869	200761	250358	315412	230603	144220	91290.1	292152	144460	116284	149679	249711	82584.8
Phenylacetaldehyde	8071.57	54870.5	69377.2	26833.1	13670.8	12923.6	61204.4	19868.2	112314	100514	219214	526759	90656.3	13874.3	9727.86	18449.2
6-hydroxyoct-5-enoylglycine	11352.9	14810.9	28328.7	18592.9	11169.7	16520.4	39480.6	18790.5	95658.2	81050.1	95585.6	97491.7	150637	183845	129952	122529
2H-1-Benzopyran-2-one, 6-(1,2-dihydroxyethyl)-7-hydroxy-8-methoxy-	105045	109589	99138.2	80801.5	53200.9	62780.7	55825.6	53242.6	49765.8	20779.1	41907.8	37852.9	7443.58	5990.43	8217.67	9628.71
6-[(3,3-dimethyloxiran-2-yl)methyl]-5-hydroxy-7-methoxy-2-(3,4,5-trimethoxyphenyl)-3,4-dihydro-2H-1-benzopyran-4-one	117563	58780.2	99702.6	144823	114008	115569	107131	151562	8342.65	26365.1	33010.2	19056.9	16407.3	2066.06	2989.9	5748.28
catechin 3-tetradecanoate	64029.7	46572.2	26105.7	44986.2	1880.7	2733.09	215.017	2340.62	2285.75	1270.09	11694.7	5.59133e-10	4.18456	1848.57	5.59133e-10	5.59133e-10
Obtusifolin 2-glucoside	207995	206980	249335	237947	277359	277409	345471	283441	323266	292165	424466	448236	116981	167862	165985	137030
Cantleyine	175527	285509	211167	131959	190062	273529	152891	200073	231981	192597	365739	244992	40227.9	72866.9	62757.2	37127.8
4-(3,7-dimethylocta-2,6-dien-1-yl)benzene-1,2,3,5-tetrol	225664	215367	307466	250908	318823	305751	410866	290029	373268	365029	517804	614960	181689	213769	226985	195695
2-Aminoheptanoate	41000	20870.1	81180.2	16303.6	35236.2	129911	137443	93231.2	292982	244763	317158	360381	18812.8	77154.8	60296.2	82368
Phenylacetylglutamine	269.805	154.082	1520.57	5.59133e-10	153.556	380.742	1308.9	726.819	41279.8	161030	57785.5	37303.1	106245	174475	135353	132611
{[1-(4-methoxyphenyl)pentan-3-yl]oxy}sulfonic acid	400.81	962.241	1052.16	5.59133e-10	764.796	67.8846	89.0298	118.788	134575	44732.2	56174	40819.7	42703.4	66450.8	300704	261836
2 -(Butylamido)-4-hydroxybutanoic acid	178320	201397	198079	83854.9	196053	212895	331619	124216	292558	267071	432966	549785	108056	126244	105806	94535.3
Avocadyne	17338.3	21203.9	6995.2	10838.2	94600.1	59877	36345.5	48478.5	43389.2	35531.5	32718.3	52528.3	28377.7	34615.1	22810.1	17971
Talaromycin A	4888.07	5076.76	7166.33	5301.74	7304.35	6340.35	10995.9	6906.89	49852.4	27801.7	27465.4	124503	121610	53407.9	141115	374955
(2R)-1-O-beta-D-Galactopyranosylglycerol	5.59133e-10	5928.68	13425.6	5.59133e-10	72193	59276.9	86173.2	25890.4	81025.8	65244.7	67959.5	33788.2	30296.7	36434	30922.8	16608.3
3,4,5-trihydroxy-6-[(3-methyl-2-oxo-4-phenylbut-3-en-1-yl)oxy]oxane-2-carboxylic acid	14346.2	67069.8	64994.2	50355.2	10231.4	28699.7	188341	73862	123411	166865	199485	432076	97058.1	230629	230031	167435
PA(8:0/16:0)	5.59133e-10	5.59133e-10	5.59133e-10	209.271	5.59133e-10	5.59133e-10	5.59133e-10	5.59133e-10	40410.6	13171	18495.4	9257.42	179134	111577	161657	83670
LysoPE(0:0/20:2(11Z,14Z))	12422.9	11827.4	20043.2	9348.37	25024.5	30708.5	16658.9	21038.4	174187	270399	202414	132342	5.59133e-10	48087.6	6731.74	43278.9
1alpha,25-Dihydroxy-previtamin D3	609.807	582.592	491.495	1292.16	285.152	261.932	5.59133e-10	125.384	15983.1	10028.4	6177.7	7454.45	128032	173236	65951.4	162800
o-O-glucuronide rosiglitazone	5.59133e-10	68.6789	5.59133e-10	86.5383	5.59133e-10	44.1279	39.257	5.59133e-10	5.59133e-10	10673.9	5.59133e-10	5.59133e-10	48353.1	159717	152650	171432
Isomaltose	8798.71	12659.6	8592.23	8749	7417.2	10827.4	8283.06	6123.22	65562.7	41574.1	28797.3	66045	105351	168756	96967.2	190959
(-)-Malyngolide	43196.1	87237.4	114010	20879.3	27925.6	22368	25135.4	24999.7	102430	71449.6	86743.1	64871.7	29755	44418.1	48741.1	16931.7
6,8-dihydroxy-octanoic acid	1544.62	1282.32	2389.22	939.785	1058.71	1287.61	2143.62	1135.85	119709	22762.9	68691.8	56320.9	200849	62753.4	174244	116196
Naphthyl dipeptide	5.59133e-10	1239.02	5.59133e-10	5.59133e-10	5.59133e-10	639.091	5.59133e-10	5.59133e-10	35258.3	54643	5895.36	15965.7	131520	136905	93947.9	163376
Indicaxanthin	21.4863	21.949	5.59133e-10	97.7235	4.93362	53.2227	1330.32	120.934	32161.8	230832	206209	423419	1904.4	89190.3	25596.8	10797
Orciprenaline	5903.45	15019.6	5707.24	14393	3424.93	13549.2	6667.23	11518.9	115387	52492.6	40009.4	66720.4	109570	107772	141174	220152
PC(O-18:0/0:0)	52358	156401	68299.2	72812.1	61156.4	52816	25552.3	19619.6	75445.4	57322.6	31428	46836	5.59133e-10	20416.7	847.49	13269.5
(1RS,2RS)-Guaiacylglycerol 1-glucoside	43483.4	10805.5	24935.4	13283.3	99167.7	69841.1	146718	111981	150805	212213	399093	245787	4413.66	16344.4	21226.6	12571.9
Palmitoleoyl 3-carbacyclic Phosphatidic Acid	13899.8	35285.2	25163.2	37829.9	50485.3	44649.8	58865.6	99544.9	2121.22	6941.3	1302.37	5.59133e-10	16053.5	22070.8	14318.5	9077.46
Glucoconvallasaponin B	46674.2	31483.6	25597.1	7131.42	118728	61208.2	73347.6	46185.6	45515.7	7836.51	52111.3	12212.2	5.59133e-10	5034.86	5.59133e-10	5.59133e-10
15-hydroxy stearic acid	121174	142841	130132	137161	201651	147349	135632	80109.7	250230	217983	272488	333485	3437.73	64889.7	16364.8	47133.7
Glutamyltryptophan	96922.9	89412.9	144873	107801	154176	153621	293002	171203	252484	208922	457072	513641	94794.8	192857	133075	98726.1
6-hydroxy-2,3,4-trimethoxybenzoic acid	1834.1	7922.27	14804.2	1160.23	77894.1	83742.8	112609	10811.2	62772.4	105434	102292	92362.5	41488.8	43925.2	78665.5	26263.8
2-amino-8-oxo-9,10-epoxy-decanoic acid	229139	180248	189287	110661	238384	170975	173904	214781	320262	218837	396302	403905	40294.7	70330.5	134117	49154.6
(S)-3-Octanol glucoside	85.3307	786.364	417.281	5.59133e-10	83.1472	282.937	90.9866	5.59133e-10	100108	70507.6	26147.8	26514.4	184264	133991	95575.5	101148
PIM1(16:0/14:0)	3228.93	13805.2	3547.28	5.59133e-10	8928.62	7333.91	1032.36	2944.56	144138	198752	158859	191562	5.59133e-10	18886	5.59133e-10	16666.8
N2-Monodes-methylnizatidine	26227.1	17791.4	15012.3	2974.84	130931	120120	140411	63720.3	113303	125432	415682	260431	9403.8	1990.49	107259	25235
6-(2-amino-2-carboxyethyl)-4-hydroxybenzothiazole	126779	118977	129449	213030	127455	88212.6	141595	140322	158611	80941.3	211806	255841	8317.15	33536.6	25584.6	20039.4
Indinavir-N-oxide	93130.5	18747.8	92390.8	20051.4	12232.9	4076.08	2261.62	10060.6	37586.7	87.2842	7210.5	838.657	585.173	5.59133e-10	5.59133e-10	5.59133e-10
trans,trans-Farnesol	201940	212915	271434	247270	286880	304184	391135	280086	326723	348734	486483	555344	172445	207632	222399	182256
(2E,4E)-2,7-Dimethyl-2,4-octadienedioic acid	9327.47	12150.2	18657.6	16856.7	11361.5	15288.3	27478.1	16417.7	64134.8	85732.5	68458	86519.8	111166	170890	87387.5	198576
MG(0:0/16:1(9Z)/0:0)	36361.2	47914.7	33947.3	17743.7	38924.8	28763.2	30868.4	20551.8	197963	182633	206682	226854	16793.1	84257.5	24189.8	74603
Stearic acid	301006	255636	280408	231757	362835	244078	372050	198597	380293	323344	467546	411312	150069	179675	177102	133267
1-(2-methoxy-6Z-heptadecenyl)-sn-glycero-3-phosphoethanolamine	32504.3	50777.9	47816.1	29355.3	177428	84310.3	73331.9	48219.8	62921.7	64801.9	33342.4	89127.7	75.9005	3696.88	155.73	4500.53
11-deoxy PGF2β	5.59133e-10	298.861	5.59133e-10	5.59133e-10	144.032	5.59133e-10	280.5	5.59133e-10	23984.2	114903	27550.9	2291.75	117344	361319	134065	46607.9
1-Arachidonoylglycerophosphoinositol	48259.5	100113	105214	228218	67133.1	46849	92311.2	111473	86338.8	91291.9	257895	98974.1	5.59133e-10	11048.3	3936.78	7997.11
Pelargonidin 3,5-di-(6-acetylglucoside)	132931	63563.6	22569.5	183426	26412.8	73434.7	3906.6	61596.7	1757.7	1067.39	5.59133e-10	612.126	1464.45	5.59133e-10	5.59133e-10	188.864
Ciclesonide	3559.76	1322.08	4266.11	3910.46	691.727	2191.39	2592.43	1394.67	31179.4	73768.6	5087	7893.15	118352	157881	93208.4	160487
Maltotriose	5.59133e-10	5.59133e-10	5.59133e-10	5.59133e-10	5.59133e-10	5.59133e-10	5.59133e-10	5.59133e-10	55736.2	32115.7	49110.2	35505.4	106974	46295.6	299210	141862
Cyanofenphos	5.59133e-10	702.744	5.59133e-10	5.59133e-10	3452.6	5.59133e-10	5.59133e-10	5.59133e-10	15940	97489.9	10331	361.583	120058	149004	111394	142046
Tafluprost	53346.7	54883	29381	35008.7	1964.15	973.08	329.744	610.71	1052.61	5.59133e-10	1136.08	5.59133e-10	1849.49	935.941	16494.3	8356.75
Ustiloxin D	2682.28	4742.94	648.637	2227.02	339.979	286.156	5.59133e-10	5.59133e-10	69873.4	14569.6	39327.7	80957.5	103748	37131	301530	164044
Methionine sulfoxide	6380.08	21432.4	1220.19	18860.4	5311.01	33640.5	844.585	16629.4	66141.8	24879.2	12314.3	44558.8	284670	217596	26435.2	132415
5'-(3'-Methoxy-4'-hydroxyphenyl)-gamma-valerolactone	2682.36	12235.7	5683.31	6209.99	2900.96	8467.96	4777.14	6902.1	55820.7	72634.7	96867.4	71774.2	103928	40436.8	202140	248879
Glycyl-Lysine	89568.4	106640	34072.3	79120.5	20828.7	31743.2	5904.02	46948.8	8194.67	1480.52	2192.31	5.59133e-10	1521.14	3274.4	610.589	1034.93
PC(20:0/0:0)	78848.2	127015	98451.7	72325.8	268835	134354	115075	49313.5	101315	166668	44775.9	82034.6	5.59133e-10	11168.4	5.59133e-10	6364
Quinalphos	168764	188733	247084	229729	250783	283166	362752	271848	286009	326842	441461	496241	161299	186879	203736	156590
Arginyl-Phenylalanine	83341.1	55828.7	40061.1	62296.1	9437.69	10017	14272.2	19152.1	10960.9	1467.58	7926.97	976.636	9089.81	8739.92	9000.74	27512.1
D-Glucuronic acid	20890.5	27902.2	9411.73	20873.1	29605.5	24521.8	24960.7	24255.3	110279	119209	38047.9	60742.8	283288	118113	69024.6	175471
N-Acetyl-L-glutamic acid	44539	71223.2	47160.2	57401.6	105162	158263	62321.5	87583.8	30761.9	98911.7	49372.4	75404.3	28548.1	31830.1	44120.7	41328.9
Flavoxate	45697.2	31079.5	27517.2	90262.6	5.59133e-10	2423.18	5.59133e-10	6829.99	5.59133e-10	3959.53	2965.08	5.59133e-10	5.59133e-10	1051.93	5.59133e-10	0.506828
Uridine monophosphate (UMP)	33634	107120	102899	15548.1	6358.09	22837.9	24424.6	13357.2	15411.6	38677.2	15540.9	2623.29	2654.43	7403.93	4279.41	593.332
Desmethylflumazenil (Ro 15-5528)	7.17582	2.11197	11566.8	5.59133e-10	26986.2	3885.81	46617.7	5.59133e-10	125638	107639	303384	367747	33563.6	39861.6	66838.6	41117.6
Obtusilactone A	8969.5	41075.7	30331.6	24720.5	15857.5	27870.2	10690.8	9464.53	150225	209778	141915	204172	526.432	76050.4	8585.54	71788
2-O-(beta-D-galactopyranosyl-(1->6)-beta-D-galactopyranosyl) 2S-hydroxynonanoic acid	1407.38	1506.39	878.932	846.604	5.59133e-10	298.692	5.59133e-10	572.539	42234.3	29501	60827.7	97533.7	107788	7166.59	242421	255453

## Sheet: Figure  3BC raw data
ID	m/z	Retention time (min)	Ion mode	Metabolites	Compound ID	Super Class	Class	Sub Class	level	kegg	Score	Fragmentation Score	Adducts	Formula	Mass Error (ppm)	VIP	P-value	adj.P-value	average(F)	average(M)	average(FH)	average(HH)	2M	3M	4M	5M		2F	3F	4F	5F		2FH	3FH	4FH	5FH		2HH	3HH	4HH	5HH
1.08_415.1459m/z	415.146	1.07812	neg	Cellulose, microcrystalline	HMDB0032197	Organic oxygen compounds	Organooxygen compounds	Carbohydrates and carbohydrate conjugates			53.2	67.6	M+FA-H	C14H26O11	0.588405	9.50429	0.00141052	0.00394651	9.47415e+06	3.97749e+06	9.08225e+06	2.3075e+06	4.49104e+06	5.80898e+06	4.41642e+06	1.19349e+06	3.97749e+06	1.09373e+07	1.14163e+07	1.12162e+07	4.32682e+06	9.47415e+06	8.51949e+06	6.2129e+06	1.0078e+07	1.15186e+07	9.08225e+06	2.17649e+06	2.67555e+06	2.49893e+06	1.87905e+06	2.3075e+06
																											#DIV/0!					#DIV/0!					#DIV/0!					#DIV/0!
																											#DIV/0!					#DIV/0!					#DIV/0!					#DIV/0!
1.20_503.1624m/z	503.162	1.20407	neg	a-L-Fucopyranosyl-(1->2)-b-D-galactopyranosyl-(1->2)-D-xylose	HMDB0041222	Organic oxygen compounds	Organooxygen compounds	Carbohydrates and carbohydrate conjugates			55.1	82.5	M+FA-H	C17H30O14	1.42667	2.91928	0.0121827	0.0218799	517160	142820	213826	114213	71472.7	330796	133158	35852.6	142820	340097	824281	678470	225791	517160	182127	206325	215603	251250	213826	114583	141114	109290	91862.5	114213
0.71_357.1041m/z	357.104	0.712983	neg	Galactose-beta-1,4-xylose	HMDB0011677	Organic oxygen compounds	Organooxygen compounds	Carbohydrates and carbohydrate conjugates			52.6	66.7	M+FA-H	C11H20O10	0.721945	4.1414	0.00104957	0.00316128	2.28573e+06	2.22809e+06	805131	247934	1.88021e+06	1.85367e+06	2.03979e+06	3.13867e+06	2.22809e+06	1.58388e+06	1.68292e+06	2.19495e+06	3.68118e+06	2.28573e+06	388322	389254	1.03068e+06	1.41227e+06	805131	173386	205898	273496	338954	247934
0.74_330.1392m/z	330.139	0.743067	pos	2-O-b-D-Galactopyranosyl-D-xylose	HMDB0038863	Organic oxygen compounds	Organooxygen compounds	Carbohydrates and carbohydrate conjugates			37.5	0	M+NH4	C11H20O10	-0.998825	2.11012	0.0216721	0.0353306	461525	253213	204693	18064.6	143781	191441	310169	367460	253213	272322	260658	603905	709217	461525	33075.8	127020	126244	532434	204693	10857.5	5.59133e-10	20392.1	41008.9	18064.6
0.74_299.0985m/z	299.099	0.740917	neg	Aldehydo-D-xylose	HMDB0060254	Organic oxygen compounds	Organooxygen compounds	Carbohydrates and carbohydrate conjugates	**	C00181	38.9	0	2M-H	C5H10O5	0.470601	1.10348	0.0262329	0.0414324	144292	186450	164002	62371.1	174350	178099	281709	111641	186450	167224	122037	186157	101748	144292	195880	99929.3	230406	129792	164002	54549.4	31922.1	80086	82926.8	62371.1
																						mean	567453	638503	691206	913407		590880	722475	915870	1.17948e+06		199851	205632	400733	581436		88344.1	94733.6	120816	138688
Cellulose					xylose related compound
FG	MG	FHG	PHG		FG	MG	FHG	PHG
1.09373e+07	4491045	8519488	2176485		590880	567453	199851	88344.1
11416306	5808983	6212903	2675552		722475	638502	205632	94733.6
11216212	4416423	1.0078e+07	2498933		915870	691206	400733	120816
4326817	1193490	1.15186e+07	1879049		1179485	913406	581436	138688

## Sheet: Figure 4A raw data
	F	M	FH	HH
Acetate kinase	1.65958e-06	7.80036e-07	1.0703e-06	1.91428e-06
Acetate kinase	7.49624e-07	7.2331e-07	1.35724e-06	1.25194e-06
Acetate kinase	8.80448e-07	6.91136e-07	9.29848e-07	1.23647e-06
Acetate kinase	8.43972e-07	7.56731e-07	7.93602e-07	1.888e-06
Alcohol dehydrogenase	1.32805e-06	2.85185e-07	6.684e-07	1.84215e-06
Alcohol dehydrogenase	3.19613e-07	2.61702e-07	8.37625e-07	9.21815e-07
Alcohol dehydrogenase	3.3121e-07	2.24247e-07	4.5057e-07	7.41867e-07
Alcohol dehydrogenase	4.15035e-07	3.9777e-07	3.79903e-07	1.73572e-06
ARABINOFURANOSIDE	0	1.167e-07	4.21967e-07	2.24333e-06
ARABINOFURANOSIDE	0	2.56333e-08	3.29333e-07	3.70667e-07
ARABINOFURANOSIDE	1.61e-08	0	1.28367e-07	0
ARABINOFURANOSIDE	0	3.56667e-08	3.19e-08	9.48e-07
a-Xylosidase	1.0975e-06	5.37625e-08	4.46675e-07	8.22121e-07
a-Xylosidase	6.56667e-08	2.36667e-09	4.97392e-07	6.10083e-07
a-Xylosidase	8.435e-08	3.79583e-09	1.25954e-07	3.86642e-07
a-Xylosidase	2.19917e-07	9.40583e-08	8.58375e-08	1.34534e-06
Benzoate dioxygenase	8.71e-06	5.8e-07	6.06e-07	4.75e-06
Benzoate dioxygenase	6.04e-07	0	2.28e-06	1.42e-06
Benzoate dioxygenase	4.52e-07	0	4.14e-07	1.6e-06
Benzoate dioxygenase	1.31e-06	9.75e-07	4.69e-07	7.14e-06
beta-glucosidase	1.88207e-06	1.16588e-06	1.54386e-06	2.45007e-06
beta-glucosidase	1.11523e-06	1.13365e-06	1.58092e-06	1.46506e-06
beta-glucosidase	1.23118e-06	1.20198e-06	1.26338e-06	1.42348e-06
beta-glucosidase	1.18696e-06	1.15686e-06	1.12808e-06	2.13766e-06
Catalase-peroxidase	1.95719e-06	1.8605e-06	1.86905e-06	2.38405e-06
Catalase-peroxidase	1.85906e-06	1.83761e-06	2.07555e-06	2.07364e-06
Catalase-peroxidase	1.79019e-06	1.90573e-06	2.10126e-06	2.09221e-06
Catalase-peroxidase	1.90487e-06	1.70064e-06	1.93774e-06	2.09927e-06
Catechol dioxygenase	2.1175e-06	2.5e-07	9.4825e-07	3.065e-06
Catechol dioxygenase	1.69075e-07	5.8225e-08	8.2e-07	7.72e-07
Catechol dioxygenase	1.2975e-07	2.4875e-08	1.7625e-07	4.15e-07
Catechol dioxygenase	3.075e-07	2.6125e-07	1.17375e-07	2.28425e-06
Celluase	3.00069e-06	3.20615e-06	2.8706e-06	3.12854e-06
Celluase	3.16692e-06	3.17077e-06	3.16077e-06	3.43692e-06
Celluase	3.00846e-06	3.10846e-06	3.06462e-06	3.33455e-06
Celluase	2.82231e-06	3.03538e-06	2.71846e-06	2.59304e-06
endo-1,4-beta-xylanase	0	0	0	0
endo-1,4-beta-xylanase	0	0	0	0
endo-1,4-beta-xylanase	0	0	0	0
endo-1,4-beta-xylanase	0	0	0	1.57e-06
Fe–Mn superoxide dismutase	1.29923e-06	1.07124e-06	1.08765e-06	1.76104e-06
Fe–Mn superoxide dismutase	8.61769e-07	7.79385e-07	1.23273e-06	1.36854e-06
Fe–Mn superoxide dismutase	1.04132e-06	7.25354e-07	1.109e-06	1.23181e-06
Fe–Mn superoxide dismutase	9.11738e-07	8.40442e-07	1.16872e-06	1.64631e-06
Galacta	2.63925e-06	2.34534e-06	2.35973e-06	2.5301e-06
Galacta	2.41841e-06	2.26423e-06	2.30942e-06	2.48995e-06
Galacta	2.33001e-06	2.38154e-06	2.36063e-06	2.43113e-06
Galacta	2.18823e-06	2.37199e-06	2.3383e-06	2.44077e-06
Galactosidase	1.10217e-06	2.58657e-07	4.62243e-07	1.22196e-06
Galactosidase	1.84475e-07	1.15552e-07	5.9944e-07	6.60222e-07
Galactosidase	1.60217e-07	1.18762e-07	2.67867e-07	4.81255e-07
Galactosidase	2.00577e-07	1.93963e-07	2.49592e-07	1.46348e-06
Lactate dehydrogenase	1.41195e-06	3.79022e-07	8.20726e-07	1.7257e-06
Lactate dehydrogenase	4.26183e-07	3.78911e-07	9.84907e-07	1.07342e-06
Lactate dehydrogenase	3.84839e-07	3.8905e-07	5.89248e-07	7.74865e-07
Lactate dehydrogenase	5.35607e-07	5.30946e-07	4.9318e-07	1.72727e-06
Peroxidase	0	0	3.4175e-07	7.775e-08
Peroxidase	0	0	0	0
Peroxidase	0	0	1.2175e-08	0
Peroxidase	5.225e-08	2.5e-08	2.925e-08	7.23075e-07
Protocatechuate dioxygenase	5.4396e-06	1.49e-07	5.84e-07	2.8e-06
Protocatechuate dioxygenase	1.0462e-07	0	1.7016e-06	1.0996e-06
Protocatechuate dioxygenase	2.59e-07	7.808e-08	1.9014e-07	1.2228e-06
Protocatechuate dioxygenase	6.817e-07	5.0446e-07	1.856e-07	3.0878e-06
Pyruvate formate lyase	1.12585e-06	8.23754e-08	5.57826e-07	1.78552e-06
Pyruvate formate lyase	7.14783e-08	9.03913e-09	7.90068e-07	7.49828e-07
Pyruvate formate lyase	5.9042e-08	1.21304e-08	2.08729e-07	5.60467e-07
Pyruvate formate lyase	1.87262e-07	1.408e-07	1.51319e-07	2.1201e-06
Pyruvate kinase	1.6354e-06	9.48512e-07	1.25182e-06	1.86516e-06
Pyruvate kinase	9.91637e-07	1.01756e-06	1.33385e-06	1.42208e-06
Pyruvate kinase	1.02572e-06	9.64683e-07	1.0687e-06	1.1286e-06
Pyruvate kinase	1.05645e-06	1.00724e-06	9.95564e-07	1.83692e-06
Xylose isomerase	1.37632e-06	6.985e-08	6.23917e-07	1.93933e-06
Xylose isomerase	9.68667e-08	1.64583e-08	1.08733e-06	1.04917e-06
Xylose isomerase	7.03333e-08	0	2.77908e-07	9.49217e-07
Xylose isomerase	1.79667e-07	1.81667e-07	1.69417e-07	2.01892e-06
Xylulose kinase	1.19658e-06	6.15576e-07	8.69407e-07	1.66632e-06
Xylulose kinase	7.44585e-07	6.2557e-07	1.08287e-06	1.1113e-06
Xylulose kinase	7.69033e-07	6.90857e-07	7.97722e-07	9.55285e-07
Xylulose kinase	6.88911e-07	7.69389e-07	6.51035e-07	1.61445e-06
	Acetate kinase	Acetate kinase	Acetate kinase	Acetate kinase	Alcohol dehydrogenase	Alcohol dehydrogenase	Alcohol dehydrogenase	Alcohol dehydrogenase	ARABINOFURANOSIDE	ARABINOFURANOSIDE	ARABINOFURANOSIDE	ARABINOFURANOSIDE	a-Xylosidase	a-Xylosidase	a-Xylosidase	a-Xylosidase	Benzoate dioxygenase	Benzoate dioxygenase	Benzoate dioxygenase	Benzoate dioxygenase	beta-glucosidase	beta-glucosidase	beta-glucosidase	beta-glucosidase	Catalase-peroxidase	Catalase-peroxidase	Catalase-peroxidase	Catalase-peroxidase	Catechol dioxygenase	Catechol dioxygenase	Catechol dioxygenase	Catechol dioxygenase	Celluase	Celluase	Celluase	Celluase	endo-1,4-beta-xylanase	endo-1,4-beta-xylanase	endo-1,4-beta-xylanase	endo-1,4-beta-xylanase	Fe–Mn superoxide dismutase	Fe–Mn superoxide dismutase	Fe–Mn superoxide dismutase	Fe–Mn superoxide dismutase	Galacta	Galacta	Galacta	Galacta	Galactosidase
FG	1.65958e-06	7.49624e-07	8.80448e-07	8.43972e-07	1.32805e-06	3.19613e-07	3.3121e-07	4.15035e-07	0	0	1.61e-08	0	1.0975e-06	6.56667e-08	8.435e-08	2.19917e-07	8.71e-06	6.04e-07	4.52e-07	1.31e-06	1.88207e-06	1.11523e-06	1.23118e-06	1.18696e-06	1.95719e-06	1.85906e-06	1.79019e-06	1.90487e-06	2.1175e-06	1.69075e-07	1.2975e-07	3.075e-07	3.00069e-06	3.16692e-06	3.00846e-06	2.82231e-06	0	0	0	0	1.29923e-06	8.61769e-07	1.04132e-06	9.11738e-07	2.63925e-06	2.41841e-06	2.33001e-06	2.18823e-06	1.10217e-06
MG	7.80036e-07	7.2331e-07	6.91136e-07	7.56731e-07	2.85185e-07	2.61702e-07	2.24247e-07	3.9777e-07	1.167e-07	2.56333e-08	0	3.56667e-08	5.37625e-08	2.36667e-09	3.79583e-09	9.40583e-08	5.8e-07	0	0	9.75e-07	1.16588e-06	1.13365e-06	1.20198e-06	1.15686e-06	1.8605e-06	1.83761e-06	1.90573e-06	1.70064e-06	2.5e-07	5.8225e-08	2.4875e-08	2.6125e-07	3.20615e-06	3.17077e-06	3.10846e-06	3.03538e-06	0	0	0	0	1.07124e-06	7.79385e-07	7.25354e-07	8.40442e-07	2.34534e-06	2.26423e-06	2.38154e-06	2.37199e-06	2.58657e-07
AHG	1.0703e-06	1.35724e-06	9.29848e-07	7.93602e-07	6.684e-07	8.37625e-07	4.5057e-07	3.79903e-07	4.21967e-07	3.29333e-07	1.28367e-07	3.19e-08	4.46675e-07	4.97392e-07	1.25954e-07	8.58375e-08	6.06e-07	2.28e-06	4.14e-07	4.69e-07	1.54386e-06	1.58092e-06	1.26338e-06	1.12808e-06	1.86905e-06	2.07555e-06	2.10126e-06	1.93774e-06	9.4825e-07	8.2e-07	1.7625e-07	1.17375e-07	2.8706e-06	3.16077e-06	3.06462e-06	2.71846e-06	0	0	0	0	1.08765e-06	1.23273e-06	1.109e-06	1.16872e-06	2.35973e-06	2.30942e-06	2.36063e-06	2.3383e-06	4.62243e-07
PHG	1.91428e-06	1.25194e-06	1.23647e-06	1.888e-06	1.84215e-06	9.21815e-07	7.41867e-07	1.73572e-06	2.24333e-06	3.70667e-07	0	9.48e-07	8.22121e-07	6.10083e-07	3.86642e-07	1.34534e-06	4.75e-06	1.42e-06	1.6e-06	7.14e-06	2.45007e-06	1.46506e-06	1.42348e-06	2.13766e-06	2.38405e-06	2.07364e-06	2.09221e-06	2.09927e-06	3.065e-06	7.72e-07	4.15e-07	2.28425e-06	3.12854e-06	3.43692e-06	3.33455e-06	2.59304e-06	0	0	0	1.57e-06	1.76104e-06	1.36854e-06	1.23181e-06	1.64631e-06	2.5301e-06	2.48995e-06	2.43113e-06	2.44077e-06	1.22196e-06
[truncated: 31 more columns]

## Sheet: Figure 5C raw data
Cluster_id	F	M	FH	HH
anfG	0	0	1.54e-07	7.66e-08
anfG	7.86e-06	8.31e-07	5.8e-07	2.56e-06
anfG	0	0	0	8.24e-07
anfG	3.03e-07	0	1.62e-06	1.87e-06
anfG	0	0	0	6.95e-08
anfG	3.58e-07	0	1.46e-07	2.4e-06
anfG	0	0	0	0
anfG	9.89e-07	1.2e-06	5.29e-07	4.2e-06
anfG
anfG
anfG
anfG
anfG
anfG
anfG
anfG
anfG
anfG
anfG
anfG
anfG
anfG
anfG
anfG
anfG
anfG
anfG
anfG
nifD	0	0	2.01e-07	2e-07
nifD	8.11e-06	5.15e-07	8.49e-07	4.89e-06
nifD	8.89e-06	5.66e-07	7.82e-07	4.09e-06
nifD	3.07e-06	1.42e-07	1.41e-07	1.58e-06
nifD	2.5e-06	3.54e-07	0	1.05e-06
nifD	0	0	0	0
nifD	0	0	0	0
nifD	0	0	0	1.06e-06
nifD	5.77e-07	5.06e-08	2.9e-06	1.25e-06
nifD	4.49e-07	0	2.87e-06	1.38e-06
nifD	1.94e-07	9.05e-08	1.05e-06	4.54e-07
nifD	0	0	9.83e-07	7.57e-07
nifD	0	0	0	0
nifD	0	0	0	0
nifD	0	0	6.46e-08	1.32e-07
nifD	4.95e-07	6.86e-08	5.75e-07	1.91e-06
nifD	5.82e-07	3.16e-08	8.52e-07	1.93e-06
nifD	1.22e-07	0	3.12e-07	1.28e-06
nifD	4.07e-07	0	3.12e-07	1.7e-06
nifD	0	0	0	0
nifD	0	0	0	0
nifD	0	0	1.95e-08	8.59e-08
nifD	1.01e-06	1.11e-06	2.73e-07	4.11e-06
nifD	1.29e-06	1.2e-06	4.84e-07	5.31e-06
nifD	2.59e-07	2.56e-07	2.25e-07	1.39e-06
nifD	2.16e-07	4.27e-07	0	9.94e-07
nifD	0	0	0	9.42e-07
nifD	0	0	0	7.45e-07
nifH	7.94e-06	2.28e-07	2.92e-07	4.52e-06
nifH	6.95e-06	3.81e-07	2.42e-07	3.82e-06
nifH	2.66e-06	1.1e-07	2.93e-07	2.19e-06
nifH	0	0	0	0
nifH	0	0	3.47e-08	0
nifH	7.41e-07	0	3.28e-06	2.08e-06
nifH	5.05e-07	0	2.37e-06	1.63e-06
nifH	3.35e-07	0	1.09e-06	1.18e-06
nifH	0	0	0	0
nifH	0	0	0	1.6e-06
nifH	4.2e-07	0	3.44e-07	2.02e-06
nifH	5.07e-07	0	5.49e-07	1.87e-06
nifH	1.27e-07	0	2.91e-07	1.66e-06
nifH	0	0	0	0
nifH	0	0	1.22e-07	6.27e-08
nifH	8.03e-07	1.26e-06	2.07e-07	4.53e-06
nifH	1.33e-06	9.4e-07	5.15e-07	4.31e-06
nifH	2.35e-07	4.32e-07	2.34e-07	1.65e-06
nifH	0	0	0	4.23e-07
nifH	0	0	0	0
nifH
nifH
nifH
nifH
nifH
nifH
nifH
nifH
nifK	0	0	1.97e-07	4.89e-08
nifK	8.22e-06	6.43e-07	4.99e-07	4.53e-06
nifK	9.58e-06	3.72e-07	9.06e-07	4.63e-06
nifK	0	0	0	0
nifK	0	0	0	1.07e-07
nifK	0	0	0	1.53e-06
nifK	4.23e-07	0	3.13e-06	1.24e-06
nifK	7.72e-07	0	2.54e-06	9.93e-07
nifK	0	0	0	0
nifK	0	0	0	1.2e-06
nifK	0	0	4.34e-08	0
nifK	5.39e-07	0	5.67e-07	2.1e-06
nifK	7.83e-07	1.25e-07	4.18e-07	1.58e-06
nifK	0	0	0	0
nifK	0	0	3.18e-08	6.51e-08
nifK	0	0	0	4.61e-08
nifK	1.26e-06	9.21e-07	4.17e-07	5.4e-06
nifK	1.17e-06	9.9e-07	3.51e-07	5.22e-06
nifK	0	0	0	1.25e-06
nifK	0	0	0	0
nifK
nifK
nifK
nifK
nifK
nifK
nifK
nifK
Nif-specific regulatory protein	9.68e-06	7.65e-07	5.27e-07	4.2e-06
Nif-specific regulatory protein	8.96e-06	4.8e-07	4.96e-07	4.11e-06
Nif-specific regulatory protein	9.89e-07	1.46e-07	2.19e-07	8e-07
Nif-specific regulatory protein	0	0	7.04e-08	0
Nif-specific regulatory protein	0	0	0	0
Nif-specific regulatory protein	0	0	0	0
Nif-specific regulatory protein	0	0	3.41e-07	1.43e-07
Nif-specific regulatory protein	6.31e-07	0	2.82e-06	1.97e-06
Nif-specific regulatory protein	4.21e-07	0	2.37e-06	7.79e-07
Nif-specific regulatory protein	0	0	8.82e-07	2.74e-07
Nif-specific regulatory protein	0	0	0	0
Nif-specific regulatory protein	0	0	0	0
Nif-specific regulatory protein	0	0	0	0
Nif-specific regulatory protein	0	0	0	1.92e-06
Nif-specific regulatory protein	4.24e-07	3.16e-08	4.17e-07	1.63e-06
Nif-specific regulatory protein	6.12e-07	6.16e-08	4.54e-07	1.17e-06
Nif-specific regulatory protein	0	6.35e-08	3.23e-07	6.28e-07
Nif-specific regulatory protein	0	0	0	0
Nif-specific regulatory protein	0	0	0	0
Nif-specific regulatory protein	0	0	0	0
Nif-specific regulatory protein	0	0	3.17e-08	9.73e-08
Nif-specific regulatory protein	1.38e-06	1.04e-06	2.32e-07	4.06e-06
Nif-specific regulatory protein	1.09e-06	8.2e-07	6.6e-07	4.04e-06
Nif-specific regulatory protein	2.01e-07	1.66e-07	0	9.94e-07
Nif-specific regulatory protein	0	0	0	6.93e-07
Nif-specific regulatory protein	2.95e-07	0	0	1.51e-06
Nif-specific regulatory protein	0	0	0	1.09e-06
Nif-specific regulatory protein	0	0	3.81e-08	6.73e-08
NifU-like protein	1e-05	2.62e-07	6.2e-07	3.32e-06
NifU-like protein	7.48e-06	3.72e-07	6.36e-07	2e-06
NifU-like protein	3.41e-06	1.22e-07	6.07e-08	1.69e-06
NifU-like protein	6.56e-07	0	1.79e-06	1.68e-06
NifU-like protein	5.32e-07	0	1.43e-06	1.19e-06
NifU-like protein	2.22e-07	0	6.2e-07	8.46e-07
NifU-like protein	4.8e-07	0	8.07e-07	1.86e-06
NifU-like protein	4.58e-07	9.21e-08	3.27e-07	7.19e-07
NifU-like protein	2.1e-07	0	6.97e-07	2.03e-06
NifU-like protein	1.65e-06	8.88e-07	4.86e-07	4.11e-06
NifU-like protein	1.17e-06	1.15e-06	2.82e-07	4.03e-06
NifU-like protein	4.46e-07	0	2.58e-07	1.31e-06
NifU-like protein
NifU-like protein
NifU-like protein
NifU-like protein
NifU-like protein
NifU-like protein
NifU-like protein
NifU-like protein
NifU-like protein
NifU-like protein
NifU-like protein
NifU-like protein
NifU-like protein
NifU-like protein
NifU-like protein
NifU-like protein
nitrogen fixation protein NifB	1.03e-05	5.5e-07	4.88e-07	3.52e-06
nitrogen fixation protein NifB	1.21e-06	1.32e-07	6.58e-08	6.22e-07
nitrogen fixation protein NifB	0	0	0	0
nitrogen fixation protein NifB	0	0	1.81e-07	1.8e-07
nitrogen fixation protein NifB	4.64e-07	0	2.51e-06	1.18e-06
nitrogen fixation protein NifB	0	0	7.02e-07	2.82e-07
nitrogen fixation protein NifB	0	0	0	0
nitrogen fixation protein NifB	0	0	8.41e-08	1.43e-06
nitrogen fixation protein NifB	2.63e-07	5.3e-08	2.33e-07	2.04e-06
nitrogen fixation protein NifB	0	0	2.9e-07	1.01e-06
nitrogen fixation protein NifB	0	0	0	0
nitrogen fixation protein NifB	0	0	8e-08	1.84e-07
nitrogen fixation protein NifB	1.08e-06	7.19e-07	1.95e-07	4.1e-06
nitrogen fixation protein NifB	1.21e-07	5.96e-08	3.5e-08	5.24e-07
nitrogen fixation protein NifB	0	0	0	1.29e-06
nitrogen fixation protein NifB	0	0	0	0
nitrogen fixation protein NifB
nitrogen fixation protein NifB
nitrogen fixation protein NifB
nitrogen fixation protein NifB
nitrogen fixation protein NifB
nitrogen fixation protein NifB
nitrogen fixation protein NifB
nitrogen fixation protein NifB
nitrogen fixation protein NifB
nitrogen fixation protein NifB
nitrogen fixation protein NifB
nitrogen fixation protein NifB
nitrogen fixation protein NifQ	6.38e-06	2.26e-07	3.39e-07	3.09e-06
nitrogen fixation protein NifQ	2.28e-07	0	0	7.03e-07
nitrogen fixation protein NifQ	3.61e-07	0	3.04e-06	1.27e-06
nitrogen fixation protein NifQ	0	0	1.09e-07	2.52e-07
nitrogen fixation protein NifQ	9.75e-08	4.9e-08	7.47e-07	1.68e-06
nitrogen fixation protein NifQ	0	0	2.08e-07	7.45e-07
nitrogen fixation protein NifQ	8.8e-07	1.13e-06	3e-07	3.49e-06
nitrogen fixation protein NifQ	0	1.07e-07	0	5.52e-07
nitrogen fixation protein NifQ
nitrogen fixation protein NifQ
nitrogen fixation protein NifQ
nitrogen fixation protein NifQ
nitrogen fixation protein NifQ
nitrogen fixation protein NifQ
nitrogen fixation protein NifQ
nitrogen fixation protein NifQ
nitrogen fixation protein NifQ
nitrogen fixation protein NifQ
nitrogen fixation protein NifQ
nitrogen fixation protein NifQ
nitrogen fixation protein NifQ
nitrogen fixation protein NifQ
nitrogen fixation protein NifQ
nitrogen fixation protein NifQ
nitrogen fixation protein NifQ
nitrogen fixation protein NifQ
nitrogen fixation protein NifQ
nitrogen fixation protein NifQ
nitrogen fixation protein NifT	5.05e-06	3.93e-07	2.61e-07	2.73e-06
nitrogen fixation protein NifT	2.39e-07	0	1.94e-06	8.4e-07
nitrogen fixation protein NifT	1.13e-07	0	9.23e-07	8.27e-07
nitrogen fixation protein NifT	1.2e-06	9.47e-07	1.39e-07	2.57e-06
nitrogen fixation protein NifT
nitrogen fixation protein NifT
nitrogen fixation protein NifT
nitrogen fixation protein NifT
nitrogen fixation protein NifT
nitrogen fixation protein NifT
nitrogen fixation protein NifT
nitrogen fixation protein NifT
nitrogen fixation protein NifT
nitrogen fixation protein NifT
nitrogen fixation protein NifT
nitrogen fixation protein NifT
nitrogen fixation protein NifT
nitrogen fixation protein NifT
nitrogen fixation protein NifT
nitrogen fixation protein NifT
nitrogen fixation protein NifT
nitrogen fixation protein NifT
nitrogen fixation protein NifT
nitrogen fixation protein NifT
nitrogen fixation protein NifT
nitrogen fixation protein NifT
nitrogen fixation protein NifT
nitrogen fixation protein NifT
nitrogen fixation protein NifU and related proteins	2.49e-07	4.52e-07	0	0
nitrogen fixation protein NifU and related proteins	7.15e-08	7.41e-08	2.96e-07	3.61e-06
nitrogen fixation protein NifU and related proteins	1.6e-06	0	1.24e-06	1.44e-06
nitrogen fixation protein NifU and related proteins	0	0	0	0
nitrogen fixation protein NifU and related proteins	4.93e-06	1.48e-07	1.11e-06	4.56e-06
nitrogen fixation protein NifU and related proteins	0	4.84e-07	9.66e-07	2.28e-06
nitrogen fixation protein NifU and related proteins	7.15e-06	1.48e-07	9.61e-07	5.45e-06
nitrogen fixation protein NifU and related proteins	0	0	0	0
nitrogen fixation protein NifU and related proteins	0	0	1.1e-06	2.3e-06
nitrogen fixation protein NifU and related proteins	2.84e-07	0	8.66e-07	1.11e-07
nitrogen fixation protein NifU and related proteins	0	0	0	0
nitrogen fixation protein NifU and related proteins	4.05e-07	0	2.95e-06	1.43e-06
nitrogen fixation protein NifU and related proteins	0	5.16e-08	3.92e-07	1.94e-07
nitrogen fixation protein NifU and related proteins	4.05e-07	0	3.77e-06	1.58e-06
nitrogen fixation protein NifU and related proteins	1.39e-06	2.8e-07	2.28e-07	1.75e-07
nitrogen fixation protein NifU and related proteins	0	0	4.57e-07	6.02e-07
nitrogen fixation protein NifU and related proteins	0	0	0	5.62e-07
nitrogen fixation protein NifU and related proteins	6.38e-08	0	0	0
nitrogen fixation protein NifU and related proteins	0	0	4.57e-07	1.2e-06
nitrogen fixation protein NifU and related proteins	0	0	0	1.09e-07
nitrogen fixation protein NifU and related proteins	0	0	4.57e-07	1.4e-06
nitrogen fixation protein NifU and related proteins	0	0	6.17e-07	0
nitrogen fixation protein NifU and related proteins	0	0	8.65e-07	1.66e-06
nitrogen fixation protein NifU and related proteins	9.51e-08	0	0	1.07e-06
nitrogen fixation protein NifU and related proteins	0	0	2.36e-07	8.32e-07
nitrogen fixation protein NifU and related proteins	5.42e-07	1.07e-06	7.08e-07	3.54e-06
nitrogen fixation protein NifU and related proteins	0	0	0	1.19e-06
nitrogen fixation protein NifU and related proteins	6.1e-07	1.34e-06	6.29e-07	5.34e-06
nitrogen fixation protein NifX	8.11e-06	4.26e-07	1.88e-06	4.6e-06
nitrogen fixation protein NifX	3.33e-07	0	2.99e-06	7.81e-07
nitrogen fixation protein NifX	2.62e-07	0	0	8.24e-07
nitrogen fixation protein NifX	9.47e-07	6.61e-07	3.23e-07	3.7e-06
nitrogen fixation protein NifX
nitrogen fixation protein NifX
nitrogen fixation protein NifX
nitrogen fixation protein NifX
nitrogen fixation protein NifX
nitrogen fixation protein NifX
nitrogen fixation protein NifX
nitrogen fixation protein NifX
nitrogen fixation protein NifX
nitrogen fixation protein NifX
nitrogen fixation protein NifX
nitrogen fixation protein NifX
nitrogen fixation protein NifX
nitrogen fixation protein NifX
nitrogen fixation protein NifX
nitrogen fixation protein NifX
nitrogen fixation protein NifX
nitrogen fixation protein NifX
nitrogen fixation protein NifX
nitrogen fixation protein NifX
nitrogen fixation protein NifX
nitrogen fixation protein NifX
nitrogen fixation protein NifX
nitrogen fixation protein NifX
nitrogen fixation protein NifZ	7.4e-06	0	3.89e-07	2.39e-06
nitrogen fixation protein NifZ	0	0	0	0
nitrogen fixation protein NifZ	5.93e-08	0	1.69e-06	1.81e-06
nitrogen fixation protein NifZ	0	0	4.16e-07	6.86e-08
nitrogen fixation protein NifZ	1.68e-07	0	0	1.17e-06
nitrogen fixation protein NifZ	0	0	1.13e-07	5.79e-07
nitrogen fixation protein NifZ	5.35e-07	4.12e-07	6.9e-08	3.35e-06
nitrogen fixation protein NifZ	0	0	0	7.8e-07
nitrogen fixation protein NifZ
nitrogen fixation protein NifZ
nitrogen fixation protein NifZ
nitrogen fixation protein NifZ
nitrogen fixation protein NifZ
nitrogen fixation protein NifZ
nitrogen fixation protein NifZ
nitrogen fixation protein NifZ
nitrogen fixation protein NifZ
nitrogen fixation protein NifZ
nitrogen fixation protein NifZ
nitrogen fixation protein NifZ
nitrogen fixation protein NifZ
nitrogen fixation protein NifZ
nitrogen fixation protein NifZ
nitrogen fixation protein NifZ
nitrogen fixation protein NifZ
nitrogen fixation protein NifZ
nitrogen fixation protein NifZ
nitrogen fixation protein NifZ
nitrogenase molybdenum-cofactor synthesis protein NifE	9.28e-06	5.43e-07	6.25e-07	3.44e-06
nitrogenase molybdenum-cofactor synthesis protein NifE	7.61e-07	1.78e-08	2.18e-06	1.41e-06
nitrogenase molybdenum-cofactor synthesis protein NifE	5.75e-07	1.81e-08	5.7e-07	1.86e-06
nitrogenase molybdenum-cofactor synthesis protein NifE	1.03e-06	9.25e-07	2.88e-07	4.12e-06
nitrogenase molybdenum-cofactor synthesis protein NifE
nitrogenase molybdenum-cofactor synthesis protein NifE
nitrogenase molybdenum-cofactor synthesis protein NifE
nitrogenase molybdenum-cofactor synthesis protein NifE
nitrogenase molybdenum-cofactor synthesis protein NifE
nitrogenase molybdenum-cofactor synthesis protein NifE
nitrogenase molybdenum-cofactor synthesis protein NifE
nitrogenase molybdenum-cofactor synthesis protein NifE
nitrogenase molybdenum-cofactor synthesis protein NifE
nitrogenase molybdenum-cofactor synthesis protein NifE
nitrogenase molybdenum-cofactor synthesis protein NifE
nitrogenase molybdenum-cofactor synthesis protein NifE
nitrogenase molybdenum-cofactor synthesis protein NifE
nitrogenase molybdenum-cofactor synthesis protein NifE
nitrogenase molybdenum-cofactor synthesis protein NifE
nitrogenase molybdenum-cofactor synthesis protein NifE
nitrogenase molybdenum-cofactor synthesis protein NifE
nitrogenase molybdenum-cofactor synthesis protein NifE
nitrogenase molybdenum-cofactor synthesis protein NifE
nitrogenase molybdenum-cofactor synthesis protein NifE
nitrogenase molybdenum-cofactor synthesis protein NifE
nitrogenase molybdenum-cofactor synthesis protein NifE
nitrogenase molybdenum-cofactor synthesis protein NifE
nitrogenase molybdenum-cofactor synthesis protein NifE
nitrogenase molybdenum-iron protein NifN	6.25e-08	0	2.26e-07	7.08e-07
nitrogenase molybdenum-iron protein NifN	8.34e-06	2.48e-07	5.37e-07	4.07e-06
nitrogenase molybdenum-iron protein NifN	5.91e-08	0	1.2e-07	6.93e-08
nitrogenase molybdenum-iron protein NifN	5.09e-07	0	2.07e-06	1.13e-06
nitrogenase molybdenum-iron protein NifN	0	0	6.57e-07	1.08e-06
nitrogenase molybdenum-iron protein NifN	3.92e-07	7.17e-08	6.74e-07	1.89e-06
nitrogenase molybdenum-iron protein NifN	0	0	6.88e-08	3.34e-07
nitrogenase molybdenum-iron protein NifN	8.9e-07	7.86e-07	3.51e-07	3.27e-06
nitrogenase molybdenum-iron protein NifN
nitrogenase molybdenum-iron protein NifN
nitrogenase molybdenum-iron protein NifN
nitrogenase molybdenum-iron protein NifN
nitrogenase molybdenum-iron protein NifN
nitrogenase molybdenum-iron protein NifN
nitrogenase molybdenum-iron protein NifN
nitrogenase molybdenum-iron protein NifN
nitrogenase molybdenum-iron protein NifN
nitrogenase molybdenum-iron protein NifN
nitrogenase molybdenum-iron protein NifN
nitrogenase molybdenum-iron protein NifN
nitrogenase molybdenum-iron protein NifN
nitrogenase molybdenum-iron protein NifN
nitrogenase molybdenum-iron protein NifN
nitrogenase molybdenum-iron protein NifN
nitrogenase molybdenum-iron protein NifN
nitrogenase molybdenum-iron protein NifN
nitrogenase molybdenum-iron protein NifN
nitrogenase molybdenum-iron protein NifN
nitrogenase-stabilizing/protective protein	6.33e-06	2.22e-07	2.22e-07	2.21e-06
nitrogenase-stabilizing/protective protein	4.05e-07	0	1.54e-06	3.56e-07
nitrogenase-stabilizing/protective protein	3.83e-07	0	1.96e-07	7.02e-07
nitrogenase-stabilizing/protective protein	4.07e-07	3.02e-07	1.18e-07	2.29e-06
nitrogenase-stabilizing/protective protein
nitrogenase-stabilizing/protective protein
nitrogenase-stabilizing/protective protein
nitrogenase-stabilizing/protective protein
nitrogenase-stabilizing/protective protein
nitrogenase-stabilizing/protective protein
nitrogenase-stabilizing/protective protein
nitrogenase-stabilizing/protective protein
nitrogenase-stabilizing/protective protein
nitrogenase-stabilizing/protective protein
nitrogenase-stabilizing/protective protein
nitrogenase-stabilizing/protective protein
nitrogenase-stabilizing/protective protein
nitrogenase-stabilizing/protective protein
nitrogenase-stabilizing/protective protein
nitrogenase-stabilizing/protective protein
nitrogenase-stabilizing/protective protein
nitrogenase-stabilizing/protective protein
nitrogenase-stabilizing/protective protein
nitrogenase-stabilizing/protective protein
nitrogenase-stabilizing/protective protein
nitrogenase-stabilizing/protective protein
nitrogenase-stabilizing/protective protein
nitrogenase-stabilizing/protective protein
Cluster_id	anfG	anfG	anfG	anfG	anfG	anfG	anfG	anfG	anfG	anfG	anfG	anfG	anfG	anfG	anfG	anfG	anfG	anfG	anfG	anfG	anfG	anfG	anfG	anfG	anfG	anfG	anfG	anfG	nifD	nifD	nifD	nifD	nifD	nifD	nifD	nifD	nifD	nifD	nifD	nifD	nifD	nifD	nifD	nifD	nifD	nifD	nifD	nifD	nifD
FG	0	7.86e-06	0	3.03e-07	0	3.58e-07	0	9.89e-07																					0	8.11e-06	8.89e-06	3.07e-06	2.5e-06	0	0	0	5.77e-07	4.49e-07	1.94e-07	0	0	0	0	4.95e-07	5.82e-07	1.22e-07	4.07e-07	0	0
MG	0	8.31e-07	0	0	0	0	0	1.2e-06																					0	5.15e-07	5.66e-07	1.42e-07	3.54e-07	0	0	0	5.06e-08	0	9.05e-08	0	0	0	0	6.86e-08	3.16e-08	0	0	0	0
AHG	1.54e-07	5.8e-07	0	1.62e-06	0	1.46e-07	0	5.29e-07																					2.01e-07	8.49e-07	7.82e-07	1.41e-07	0	0	0	0	2.9e-06	2.87e-06	1.05e-06	9.83e-07	0	0	6.46e-08	5.75e-07	8.52e-07	3.12e-07	3.12e-07	0	0
PHG	7.66e-08	2.56e-06	8.24e-07	1.87e-06	6.95e-08	2.4e-06	0	4.2e-06																					2e-07	4.89e-06	4.09e-06	1.58e-06	1.05e-06	0	0	1.06e-06	1.25e-06	1.38e-06	4.54e-07	7.57e-07	0	0	1.32e-07	1.91e-06	1.93e-06	1.28e-06	1.7e-06	0	0
[truncated: 371 more columns]
