# Supplementary material for: Gut microbiota contributes to lignocellulose deconstruction and nitrogen fixation of the larva of Apriona swainsoni
Source: Front Physiol. 2022 Dec 23;13:1072893. doi: 10.3389/fphys.2022.1072893 (PMC9816477; doi:10.3389/fphys.2022.1072893)
Supplement: Supplementary file 3 [file Table1.XLSX]

## Sheet: FG_bin.stats
FG
bin	completeness	contamination	GC	lineage	N50	size	binner	Taxonomy
bin.1	93.04	3.333	0.578	Enterobacteriaceae	15372	4977450	binsA	Bacteria;Proteobacteria;Gammaproteobacteria;Enterobacterales;Enterobacteriaceae
MG
bin	completeness	contamination	GC	lineage	N50	size	binner	Taxonomy
bin.1	97.91	3.863	0.567	Enterobacteriaceae	10493	6049723	binsC	Bacteria;Proteobacteria;Gammaproteobacteria;Enterobacterales;Enterobacteriaceae
AHG
bin	completeness	contamination	GC	lineage	N50	size	binner	Taxonomy
bin.1	96.77	2.935	0.575	Enterobacteriaceae	32858	5383101	binsA	Bacteria;Proteobacteria;Gammaproteobacteria;Enterobacterales;Enterobacteriaceae
bin.5	94.91	2.92	0.386	Lactobacillales	9883	3662421	binsC	Bacteria;Firmicutes;Bacilli;Lactobacillales;Enterococcaceae
bin.4	78.71	2.568	0.567	Enterobacteriaceae	9096	4003981	binsBC	Bacteria;Proteobacteria;Gammaproteobacteria;Enterobacterales;Enterobacteriaceae;Gibbsiella;Gibbsiella quercinecans
PHG
bin	completeness	contamination	GC	lineage	N50	size	binner	Taxonomy
bin.9	96.81	2.737	0.388	Lactobacillales	26915	3460763	binsA	Bacteria;Firmicutes;Bacilli;Lactobacillales;Enterococcaceae
bin.2	92.49	0	0.354	Bacteria	295465	3456116	binsA	Bacteria;Bacteroidetes
bin.3	90.21	4.873	0.403	Gammaproteobacteria	8118	5442888	binsC	Bacteria;Proteobacteria;Gammaproteobacteria;Enterobacterales;Morganellaceae;Providencia;Providencia rettgeri
bin.6	51.2	0	0.534	Bacteria	6172	5829391	binsBC	Bacteria;Proteobacteria;Gammaproteobacteria;Enterobacterales;Enterobacteriaceae
bin.4	50.86	0	0.571	Bacteria	6719	5018623	binsB	Bacteria;Proteobacteria;Gammaproteobacteria;Enterobacterales;Enterobacteriaceae
